# Supplementary material
Source: publisher site journal article supplement (https://uk.sagepub.com/sites/default/files/upm-binaries/74511_AppendixC_LogFiles.zip)
Supplement: Supplementary file 1 [file 74511_AppendixC_LogFiles.zip]

```
*****
* A Practical Guide to Using Panel Data
* Simonetta Longhi and Alita Nandi
* ISER, University of Essex
* Chapter 8
*****
```

```
-----
name: <unnamed>
log: C:\My Documents\Example_Chapter8.log
log type: text
opened on: 1 Sep 2014, 15:18:49
```

```
.
.
.
. * 8.1. Introduction
. *-----
.
. use "$datadir/rindresp", clear

. rename r* *

. quietly mvdecode _all, mv(-9/-1)

.
. * When "quietly" is added before the command, Stata
. * will run the command without showing the results of the command
.
. * 8.2. Continuous Variables
. * 8.2.1. Correlations Coefficients vs. Regression Coefficients
. *-----
.
. label var paygu "Usual gross pay per month"

.
. set more on

.
. correlate paygu age
(obs=7067)

-----+-----
      |      paygu      age
-----+-----
paygu |      1.0000
age   |      0.1492      1.0000

. scatter paygu age, scheme(s1manual)

. more

. twoway (scatter paygu age) (lfit paygu age), scheme(s1manual)

. more

.
. generate LnW = ln(paygu)
(7351 missing values generated)

.
. kdensity paygu

. more

. kdensity LnW

. more

. twoway (scatter LnW age) (lfit LnW age), scheme(s1manual)

.
```

```

. set more off

.
. generate age2 = age^2
(1 missing value generated)

.
. generate Female = 1 if sex == 2
(6973 missing values generated)

. replace Female = 0 if sex == 1
(6239 real changes made)

. label var Female "Dummy for women"

.
. generate Married = 1 if mastat == 1 | mastat == 2 | mastat == 7
(5197 missing values generated)

. replace Married = 0 if (mastat >= 3 & mastat <= 6) | (mastat >= 8 & mastat < .)
(5157 real changes made)

. label var Married "Whether married or cohabiting"

.
. * qfachi: highest academic qualification
. recode qfachi (-9/-1 = .) (1 = 2)
(qfachi: 424 changes made)

. tabulate qfachi, gen(Q)

```

|                  | highest academic<br>qualification | Freq.  | Percent | Cum.   |
|------------------|-----------------------------------|--------|---------|--------|
|                  | 1st degree                        | 2,023  | 15.23   | 15.23  |
| hnd,hnc,teaching | a level                           | 918    | 6.91    | 22.14  |
|                  | o level                           | 2,768  | 20.84   | 42.98  |
|                  | cse                               | 3,391  | 25.53   | 68.50  |
|                  | none of these                     | 671    | 5.05    | 73.55  |
|                  |                                   | 3,513  | 26.45   | 100.00 |
| Total            |                                   | 13,284 | 100.00  |        |

```

. label var Q1 "1st degree or higher"

. label var Q2 "HND,HNC,teaching"

. label var Q3 "A level"

. label var Q4 "O level"

. label var Q5 "CSE"

. label var Q6 "none of these qualif"

```

```

.
. * region2: Government Office Regions
. tabulate region2, gen(R)

```

|                    | government office<br>region | Freq. | Percent | Cum.  |
|--------------------|-----------------------------|-------|---------|-------|
|                    | north east                  | 361   | 2.52    | 2.52  |
|                    | north west                  | 1,044 | 7.28    | 9.80  |
| yorkshire & humber | east midlands               | 827   | 5.77    | 15.57 |
|                    | west midlands               | 722   | 5.04    | 20.61 |
|                    | east of england             | 714   | 4.98    | 25.59 |
|                    | london                      | 839   | 5.85    | 31.44 |
|                    | south east                  | 617   | 4.30    | 35.74 |
|                    | south west                  | 1,168 | 8.15    | 43.89 |
|                    | wales                       | 812   | 5.66    | 49.56 |
|                    | scotland                    | 2,563 | 17.88   | 67.44 |
|                    |                             | 2,462 | 17.17   | 84.61 |

|                  |  |        |        |        |
|------------------|--|--------|--------|--------|
| northern ireland |  | 2,206  | 15.39  | 100.00 |
| -----+           |  |        |        |        |
| Total            |  | 14,335 | 100.00 |        |

```
. label var R1 "North East"
. label var R2 "North West"
. label var R3 "Yorkshire & Humber"
. label var R4 "East Midlands"
. label var R5 "West Midlands"
. label var R6 "East of England"
. label var R7 "London"
. label var R8 "South East"
. label var R9 "South West"
. label var R10 "Wales"
. label var R11 "Scotland"
. label var R12 "Northern Ireland"
```

```
.
. save DatasetR.dta, replace
file DatasetR.dta saved
```

```
.
. regress LnW age
```

| Source   | SS         | df   | MS         | Number of obs = | 7067   |
|----------|------------|------|------------|-----------------|--------|
| -----+   |            |      |            |                 |        |
| Model    | 151.535381 | 1    | 151.535381 | F( 1, 7065) =   | 233.95 |
| Residual | 4576.13267 | 7065 | .647718708 | Prob > F =      | 0.0000 |
| -----+   |            |      |            |                 |        |
| Total    | 4727.66805 | 7066 | .66907275  | R-squared =     | 0.0321 |
|          |            |      |            | Adj R-squared = | 0.0319 |
|          |            |      |            | Root MSE =      | .80481 |

| LnW    | Coef.    | Std. Err. | t      | P> t  | [95% Conf. Interval] |
|--------|----------|-----------|--------|-------|----------------------|
| -----+ |          |           |        |       |                      |
| age    | .0111543 | .0007293  | 15.30  | 0.000 | .0097247 .0125838    |
| _cons  | 6.748847 | .0302577  | 223.05 | 0.000 | 6.689533 6.808161    |

```
. * Compare with:
. regress LnW age age2 Female Married Q1-Q5 R1-R6 R8-R12
```

| Source   | SS         | df   | MS         | Number of obs = | 6933   |
|----------|------------|------|------------|-----------------|--------|
| -----+   |            |      |            |                 |        |
| Model    | 1763.50556 | 20   | 88.1752779 | F( 20, 6912) =  | 217.90 |
| Residual | 2797.04324 | 6912 | .40466482  | Prob > F =      | 0.0000 |
| -----+   |            |      |            |                 |        |
| Total    | 4560.54879 | 6932 | .657897979 | R-squared =     | 0.3867 |
|          |            |      |            | Adj R-squared = | 0.3849 |
|          |            |      |            | Root MSE =      | .63613 |

| LnW     | Coef.     | Std. Err. | t      | P> t  | [95% Conf. Interval] |
|---------|-----------|-----------|--------|-------|----------------------|
| -----+  |           |           |        |       |                      |
| age     | .1277878  | .0036589  | 34.93  | 0.000 | .1206152 .1349604    |
| age2    | -.0014583 | .0000442  | -33.01 | 0.000 | -.0015449 -.0013717  |
| Female  | -.5173127 | .0153669  | -33.66 | 0.000 | -.5474366 -.4871888  |
| Married | .0835274  | .0188041  | 4.44   | 0.000 | .0466656 .1203891    |
| Q1      | .7055081  | .0287987  | 24.50  | 0.000 | .6490539 .7619623    |
| Q2      | .5010076  | .0358421  | 13.98  | 0.000 | .4307461 .5712691    |
| Q3      | .2901391  | .0280411  | 10.35  | 0.000 | .2351699 .3451084    |
| Q4      | .1872705  | .0272528  | 6.87   | 0.000 | .1338467 .2406943    |
| Q5      | .1165528  | .0396332  | 2.94   | 0.003 | .0388596 .194246     |
| R1      | -.2786627 | .0589121  | -4.73  | 0.000 | -.3941486 -.1631768  |
| R2      | -.3066754 | .0458084  | -6.69  | 0.000 | -.3964739 -.2168769  |

|       |           |          |       |       |           |           |
|-------|-----------|----------|-------|-------|-----------|-----------|
| R3    | -.2909338 | .0483127 | -6.02 | 0.000 | -.3856416 | -.196226  |
| R4    | -.3418577 | .0491452 | -6.96 | 0.000 | -.4381973 | -.245518  |
| R5    | -.3572488 | .0496795 | -7.19 | 0.000 | -.4546359 | -.2598618 |
| R6    | -.258527  | .0486662 | -5.31 | 0.000 | -.3539278 | -.1631262 |
| R8    | -.2885082 | .0444103 | -6.50 | 0.000 | -.3755661 | -.2014503 |
| R9    | -.3170754 | .0480772 | -6.60 | 0.000 | -.4113216 | -.2228293 |
| R10   | -.3830289 | .0413105 | -9.27 | 0.000 | -.4640102 | -.3020475 |
| R11   | -.3182777 | .0408353 | -7.79 | 0.000 | -.3983274 | -.238228  |
| R12   | -.3309315 | .0419792 | -7.88 | 0.000 | -.4132236 | -.2486394 |
| _cons | 4.878964  | .0780401 | 62.52 | 0.000 | 4.725981  | 5.031946  |

. \* 8.2.2. Different Types of Standard Errors

. regress LnW age age2 Female Married Q1-Q5 R1-R6 R8-R12, vce(robust)

|                   |                 |          |
|-------------------|-----------------|----------|
| Linear regression | Number of obs = | 6933     |
|                   | F( 20, 6912) =  | 199.52   |
|                   | Prob > F        | = 0.0000 |
|                   | R-squared       | = 0.3867 |
|                   | Root MSE        | = .63613 |

| LnW     | Coef.     | Robust Std. Err. | t      | P> t  | [95% Conf. Interval] |           |
|---------|-----------|------------------|--------|-------|----------------------|-----------|
| age     | .1277878  | .0042482         | 30.08  | 0.000 | .1194601             | .1361156  |
| age2    | -.0014583 | .0000519         | -28.11 | 0.000 | -.00156              | -.0013566 |
| Female  | -.5173127 | .0151984         | -34.04 | 0.000 | -.5471062            | -.4875193 |
| Married | .0835274  | .0177792         | 4.70   | 0.000 | .0486747             | .1183801  |
| Q1      | .7055081  | .0295252         | 23.90  | 0.000 | .6476296             | .7633866  |
| Q2      | .5010076  | .0362811         | 13.81  | 0.000 | .4298855             | .5721297  |
| Q3      | .2901391  | .0289532         | 10.02  | 0.000 | .2333821             | .3468962  |
| Q4      | .1872705  | .0287069         | 6.52   | 0.000 | .1309963             | .2435448  |
| Q5      | .1165528  | .0373302         | 3.12   | 0.002 | .0433741             | .1897315  |
| R1      | -.2786627 | .0536325         | -5.20  | 0.000 | -.3837988            | -.1735266 |
| R2      | -.3066754 | .0464689         | -6.60  | 0.000 | -.3977687            | -.2155822 |
| R3      | -.2909338 | .0466247         | -6.24  | 0.000 | -.3823325            | -.1995351 |
| R4      | -.3418577 | .0483738         | -7.07  | 0.000 | -.4366852            | -.2470301 |
| R5      | -.3572488 | .0509676         | -7.01  | 0.000 | -.457161             | -.2573366 |
| R6      | -.258527  | .0514016         | -5.03  | 0.000 | -.35929              | -.157764  |
| R8      | -.2885082 | .0464486         | -6.21  | 0.000 | -.3795616            | -.1974547 |
| R9      | -.3170754 | .0474077         | -6.69  | 0.000 | -.4100092            | -.2241417 |
| R10     | -.3830289 | .0417081         | -9.18  | 0.000 | -.4647895            | -.3012682 |
| R11     | -.3182777 | .040951          | -7.77  | 0.000 | -.3985543            | -.2380012 |
| R12     | -.3309315 | .041912          | -7.90  | 0.000 | -.4130919            | -.2487711 |
| _cons   | 4.878964  | .089349          | 54.61  | 0.000 | 4.703812             | 5.054115  |

. \* 8.2.3. Post-estimation Commands

```
. predict yhat_a, xb
(1250 missing values generated)

. label var yhat_a "Predictions (xb) on full sample"

. predict yhat_a_se, stdp
(1250 missing values generated)

. predict yhat_b if e(sample), xb
(7486 missing values generated)

. label var yhat_a "Predictions (xb) on estimation sample"

. predict yhat_b_se if e(sample), stdp
(7486 missing values generated)
```

```
. test Female
```

```
( 1) Female = 0
```

```
F( 1, 6912) = 1158.55
Prob > F = 0.0000
```

```
. test Q1 Q2 Q3 Q4 Q5
```

```
( 1) Q1 = 0
```

```
( 2) Q2 = 0
```

```
( 3) Q3 = 0
```

```
( 4) Q4 = 0
```

```
( 5) Q5 = 0
```

```
F( 5, 6912) = 190.02
Prob > F = 0.0000
```

```
.
. * Run the model again after including a dummy for part-time workers
. * jbf: employed full time
. tabulate jbf, gen(PT)
```

| employed full time   | Freq. | Percent | Cum.   |
|----------------------|-------|---------|--------|
| full time: 30 hrs +  | 6,337 | 75.21   | 75.21  |
| part time: lt 30 hrs | 2,089 | 24.79   | 100.00 |
| Total                | 8,426 | 100.00  |        |

```
. rename PT2 PartTime
```

```
. regress LnW age age2 Female Married PartTime Q1-Q5 R1-R6 R8-R12, vce(robust)
```

```
Linear regression      Number of obs =    6880
                      F( 21, 6858) =    400.56
                      Prob > F      =    0.0000
                      R-squared      =    0.6244
                      Root MSE     =    .49619
```

| LnW      | Coef.     | Robust Std. Err. | t      | P> t  | [95% Conf. Interval] |           |
|----------|-----------|------------------|--------|-------|----------------------|-----------|
| age      | .088841   | .0034059         | 26.08  | 0.000 | .0821643             | .0955177  |
| age2     | -.0009707 | .0000424         | -22.88 | 0.000 | -.0010538            | -.0008875 |
| Female   | -.2256467 | .0127961         | -17.63 | 0.000 | -.250731             | -.2005623 |
| Married  | .1138963  | .0140509         | 8.11   | 0.000 | .0863523             | .1414403  |
| PartTime | -.987484  | .0180455         | -54.72 | 0.000 | -1.022859            | -.9521092 |
| Q1       | .6088579  | .0238686         | 25.51  | 0.000 | .5620681             | .6556478  |
| Q2       | .4082738  | .0292568         | 13.95  | 0.000 | .3509214             | .4656261  |
| Q3       | .2751816  | .0230068         | 11.96  | 0.000 | .2300811             | .3202821  |
| Q4       | .160291   | .022508          | 7.12   | 0.000 | .1161683             | .2044136  |
| Q5       | .0863405  | .0293789         | 2.94   | 0.003 | .0287487             | .1439323  |
| R1       | -.2884608 | .0431974         | -6.68  | 0.000 | -.3731412            | -.2037805 |
| R2       | -.2902021 | .0385291         | -7.53  | 0.000 | -.365731             | -.2146731 |
| R3       | -.2645453 | .0388755         | -6.80  | 0.000 | -.3407534            | -.1883372 |
| R4       | -.2965224 | .0401363         | -7.39  | 0.000 | -.3752019            | -.2178428 |
| R5       | -.3299882 | .0421835         | -7.82  | 0.000 | -.412681             | -.2472954 |
| R6       | -.2236844 | .0417228         | -5.36  | 0.000 | -.3054741            | -.1418947 |
| R8       | -.2172875 | .0379952         | -5.72  | 0.000 | -.29177              | -.1428051 |
| R9       | -.2628452 | .0387062         | -6.79  | 0.000 | -.3387213            | -.186969  |
| R10      | -.3401631 | .035284          | -9.64  | 0.000 | -.4093307            | -.2709955 |
| R11      | -.2572789 | .0346461         | -7.43  | 0.000 | -.3251961            | -.1893618 |
| R12      | -.3076073 | .0351798         | -8.74  | 0.000 | -.3765706            | -.238644  |
| _cons    | 5.655043  | .0706139         | 80.08  | 0.000 | 5.516618             | 5.793468  |

```
.
.
. * 8.2.4. Diagnostics
. *-----
.
```

```
. regress LnW age age2 Female Married Q1-Q5 R1-R6 R8-R12
```

| Source   | SS         | df   | MS         | Number of obs = | 6933   |
|----------|------------|------|------------|-----------------|--------|
| Model    | 1763.50556 | 20   | 88.1752779 | F( 20, 6912) =  | 217.90 |
| Residual | 2797.04324 | 6912 | .40466482  | Prob > F =      | 0.0000 |
|          |            |      |            | R-squared =     | 0.3867 |
|          |            |      |            | Adj R-squared = | 0.3849 |
| Total    | 4560.54879 | 6932 | .657897979 | Root MSE =      | .63613 |

| LnW     | Coef.     | Std. Err. | t      | P> t  | [95% Conf. Interval] |
|---------|-----------|-----------|--------|-------|----------------------|
| age     | .1277878  | .0036589  | 34.93  | 0.000 | .1206152 .1349604    |
| age2    | -.0014583 | .0000442  | -33.01 | 0.000 | -.0015449 -.0013717  |
| Female  | -.5173127 | .0153669  | -33.66 | 0.000 | -.5474366 -.4871888  |
| Married | .0835274  | .0188041  | 4.44   | 0.000 | .0466656 .1203891    |
| Q1      | .7055081  | .0287987  | 24.50  | 0.000 | .6490539 .7619623    |
| Q2      | .5010076  | .0358421  | 13.98  | 0.000 | .4307461 .5712691    |
| Q3      | .2901391  | .0280411  | 10.35  | 0.000 | .2351699 .3451084    |
| Q4      | .1872705  | .0272528  | 6.87   | 0.000 | .1338467 .2406943    |
| Q5      | .1165528  | .0396332  | 2.94   | 0.003 | .0388596 .194246     |
| R1      | -.2786627 | .0589121  | -4.73  | 0.000 | -.3941486 -.1631768  |
| R2      | -.3066754 | .0458084  | -6.69  | 0.000 | -.3964739 -.2168769  |
| R3      | -.2909338 | .0483127  | -6.02  | 0.000 | -.3856416 -.196226   |
| R4      | -.3418577 | .0491452  | -6.96  | 0.000 | -.4381973 -.245518   |
| R5      | -.3572488 | .0496795  | -7.19  | 0.000 | -.4546359 -.2598618  |
| R6      | -.258527  | .0486662  | -5.31  | 0.000 | -.3539278 -.1631262  |
| R8      | -.2885082 | .0444103  | -6.50  | 0.000 | -.3755661 -.2014503  |
| R9      | -.3170754 | .0480772  | -6.60  | 0.000 | -.4113216 -.2228293  |
| R10     | -.3830289 | .0413105  | -9.27  | 0.000 | -.4640102 -.3020475  |
| R11     | -.3182777 | .0408353  | -7.79  | 0.000 | -.3983274 -.238228   |
| R12     | -.3309315 | .0419792  | -7.88  | 0.000 | -.4132236 -.2486394  |
| _cons   | 4.878964  | .0780401  | 62.52  | 0.000 | 4.725981 5.031946    |

```
.
. * Heteroskedasticity
. set more on
```

```
. rvfplot, yline(0)
```

```
. more
```

```
. estat hettest
```

```
Breusch-Pagan / Cook-Weisberg test for heteroskedasticity
Ho: Constant variance
Variables: fitted values of LnW
```

```
chi2(1)          =    271.81
Prob > chi2      =    0.0000
```

```
.
. * Multicollinearity
. estat vif
```

| Variable | VIF   | 1/VIF    |
|----------|-------|----------|
| age      | 39.32 | 0.025434 |
| age2     | 38.10 | 0.026244 |
| R11      | 4.18  | 0.239391 |
| R10      | 3.94  | 0.253791 |
| R12      | 3.62  | 0.276435 |
| R8       | 2.82  | 0.354686 |
| Q4       | 2.56  | 0.390217 |
| R2       | 2.55  | 0.391940 |
| Q3       | 2.53  | 0.395479 |
| Q1       | 2.37  | 0.422075 |
| R9       | 2.24  | 0.445704 |
| R3       | 2.22  | 0.450460 |
| R6       | 2.17  | 0.459784 |
| R4       | 2.13  | 0.468803 |
| R5       | 2.08  | 0.481658 |

|         |      |          |
|---------|------|----------|
| R1      | 1.58 | 0.630958 |
| Q2      | 1.57 | 0.636926 |
| Q5      | 1.48 | 0.675560 |
| Married | 1.30 | 0.770387 |
| Female  | 1.01 | 0.992633 |

---

|          |      |
|----------|------|
| Mean VIF | 5.99 |
|----------|------|

```
. collin age age2 Female Married Q1-Q5 R1-R6 R8-R12
(obs=13169)
```

# Collinearity Diagnostics

| Variable | VIF | SQRT<br>VIF | Tolerance | R-<br>Squared |
|----------|-----|-------------|-----------|---------------|
|----------|-----|-------------|-----------|---------------|

---

|         |       |      |        |        |
|---------|-------|------|--------|--------|
| age     | 32.74 | 5.72 | 0.0305 | 0.9695 |
| age2    | 32.52 | 5.70 | 0.0307 | 0.9693 |
| Female  | 1.01  | 1.01 | 0.9898 | 0.0102 |
| Married | 1.30  | 1.14 | 0.7718 | 0.2282 |
| Q1      | 1.58  | 1.26 | 0.6347 | 0.3653 |
| Q2      | 1.24  | 1.11 | 0.8058 | 0.1942 |
| Q3      | 1.75  | 1.32 | 0.5726 | 0.4274 |
| Q4      | 1.72  | 1.31 | 0.5806 | 0.4194 |
| Q5      | 1.25  | 1.12 | 0.7969 | 0.2031 |
| R1      | 1.58  | 1.26 | 0.6327 | 0.3673 |
| R2      | 2.59  | 1.61 | 0.3859 | 0.6141 |
| R3      | 2.29  | 1.51 | 0.4361 | 0.5639 |
| R4      | 2.13  | 1.46 | 0.4687 | 0.5313 |
| R5      | 2.10  | 1.45 | 0.4753 | 0.5247 |
| R6      | 2.30  | 1.52 | 0.4347 | 0.5653 |
| R8      | 2.77  | 1.67 | 0.3604 | 0.6396 |
| R9      | 2.28  | 1.51 | 0.4387 | 0.5613 |
| R10     | 4.39  | 2.09 | 0.2280 | 0.7720 |
| R11     | 4.31  | 2.08 | 0.2321 | 0.7679 |
| R12     | 4.18  | 2.04 | 0.2394 | 0.7606 |

---

|          |      |
|----------|------|
| Mean VIF | 5.30 |
|----------|------|

|  | Eigenval | Cond<br>Index |
|--|----------|---------------|
|--|----------|---------------|

---

|    |        |         |
|----|--------|---------|
| 1  | 5.6064 | 1.0000  |
| 2  | 1.0871 | 2.2709  |
| 3  | 1.0479 | 2.3130  |
| 4  | 1.0384 | 2.3236  |
| 5  | 1.0167 | 2.3483  |
| 6  | 1.0033 | 2.3639  |
| 7  | 1.0004 | 2.3672  |
| 8  | 1.0002 | 2.3675  |
| 9  | 1.0001 | 2.3677  |
| 10 | 1.0000 | 2.3678  |
| 11 | 1.0000 | 2.3678  |
| 12 | 0.9872 | 2.3831  |
| 13 | 0.9685 | 2.4060  |
| 14 | 0.9565 | 2.4210  |
| 15 | 0.9204 | 2.4680  |
| 16 | 0.5262 | 3.2641  |
| 17 | 0.4411 | 3.5653  |
| 18 | 0.2789 | 4.4837  |
| 19 | 0.0995 | 7.5063  |
| 20 | 0.0185 | 17.4225 |
| 21 | 0.0028 | 45.0067 |

---

Condition Number 45.0067

Eigenvalues & Cond Index computed from scaled raw sscp (w/ intercept)

Det(correlation matrix) 0.0015

```
.
. * Normality
. predict Resid, residuals
(7486 missing values generated)
```

```

. kdensity Resid, normal

. more

.
. mvtest norm Resid, stats(all)

Test for multivariate normality

Mardia mSkewness = .6036374      chi2(1) = 698.107      Prob>chi2 = 0.0000
Mardia mKurtosis = 4.703037      chi2(1) = 837.835      Prob>chi2 = 0.0000
Henze-Zirkler    = 45.98647      chi2(1) = 78.707      Prob>chi2 = 0.0000
Doornik-Hansen   =                chi2(2) = 555.507      Prob>chi2 = 0.0000

.
. set more off

.
. * 8.2.5. Interaction Terms
. *-----
. generate MarriedWoman = Married * Female
(770 missing values generated)

. regress LnW age age2 Female Married MarriedWoman Q1-Q5 R1-R6 R8-R12, vce(robust)

```

```

Linear regression                                Number of obs =      6933
                                                F( 21,  6911) =    197.69
                                                Prob > F       =    0.0000
                                                R-squared      =    0.3950
                                                Root MSE     =    .63186

```

|              | LnW     | Coef.     | Robust Std. Err. | t      | P> t  | [95% Conf. Interval] |           |
|--------------|---------|-----------|------------------|--------|-------|----------------------|-----------|
|              | age     | .1276517  | .0042391         | 30.11  | 0.000 | .1193417             | .1359617  |
|              | age2    | -.0014612 | .0000517         | -28.24 | 0.000 | -.0015626            | -.0013598 |
|              | Female  | -.2948867 | .029477          | -10.00 | 0.000 | -.3526708            | -.2371026 |
|              | Married | .2621487  | .0248542         | 10.55  | 0.000 | .2134269             | .3108706  |
| MarriedWoman |         | -.3218283 | .0342282         | -9.40  | 0.000 | -.388926             | -.2547305 |
|              | Q1      | .7027223  | .0292402         | 24.03  | 0.000 | .6454025             | .7600421  |
|              | Q2      | .4988589  | .0360588         | 13.83  | 0.000 | .4281726             | .5695453  |
|              | Q3      | .2826265  | .0285748         | 9.89   | 0.000 | .226611              | .3386419  |
|              | Q4      | .1857889  | .0283883         | 6.54   | 0.000 | .1301392             | .2414387  |
|              | Q5      | .1159745  | .0370145         | 3.13   | 0.002 | .0434146             | .1885344  |
|              | R1      | -.2761127 | .0537536         | -5.14  | 0.000 | -.3814864            | -.1707391 |
|              | R2      | -.2988173 | .0464111         | -6.44  | 0.000 | -.3897972            | -.2078373 |
|              | R3      | -.2868429 | .0464893         | -6.17  | 0.000 | -.3779762            | -.1957096 |
|              | R4      | -.3388793 | .048426          | -7.00  | 0.000 | -.4338092            | -.2439494 |
|              | R5      | -.3559591 | .0508977         | -6.99  | 0.000 | -.4557343            | -.2561839 |
|              | R6      | -.2522411 | .0510619         | -4.94  | 0.000 | -.3523382            | -.1521441 |
|              | R8      | -.2839727 | .0463723         | -6.12  | 0.000 | -.3748766            | -.1930688 |
|              | R9      | -.3158565 | .0473003         | -6.68  | 0.000 | -.4085796            | -.2231334 |
|              | R10     | -.38301   | .0416297         | -9.20  | 0.000 | -.464617             | -.301403  |
|              | R11     | -.3159382 | .0409452         | -7.72  | 0.000 | -.3962034            | -.235673  |
|              | R12     | -.3337361 | .0419031         | -7.96  | 0.000 | -.415879             | -.2515932 |
|              | _cons   | 4.764389  | .089859          | 53.02  | 0.000 | 4.588238             | 4.94054   |

```

. test Married + MarriedWoman = 0

```

```

( 1) Married + MarriedWoman = 0

```

```

      F( 1,  6911) =    6.06
      Prob > F =    0.0138

```

```

.
. * Vs separate estimations: men
. regress LnW age age2 Married Q1-Q5 R1-R6 R8-R12 if Female == 0, vce(robust)

```

```

Linear regression                                Number of obs =    3248
                                                F( 19,  3228) =    75.14
                                                Prob > F       =    0.0000

```



R-squared = 0.3997  
Root MSE = .56676

| LnW     | Coef.     | Robust Std. Err. | t      | P> t  | [95% Conf. Interval] |           |
|---------|-----------|------------------|--------|-------|----------------------|-----------|
| age     | .1443334  | .0057842         | 24.95  | 0.000 | .1329922             | .1556745  |
| age2    | -.0016376 | .000069          | -23.73 | 0.000 | -.0017729            | -.0015022 |
| Married | .217188   | .0246666         | 8.80   | 0.000 | .1688242             | .2655517  |
| Q1      | .5101071  | .0377811         | 13.50  | 0.000 | .4360296             | .5841845  |
| Q2      | .407089   | .0453442         | 8.98   | 0.000 | .3181826             | .4959954  |
| Q3      | .197006   | .0365656         | 5.39   | 0.000 | .1253118             | .2687002  |
| Q4      | .1809222  | .0365909         | 4.94   | 0.000 | .1091785             | .2526659  |
| Q5      | .1751289  | .0455008         | 3.85   | 0.000 | .0859155             | .2643424  |
| R1      | -.3050504 | .0726482         | -4.20  | 0.000 | -.4474917            | -.1626091 |
| R2      | -.2574072 | .0582356         | -4.42  | 0.000 | -.3715897            | -.1432248 |
| R3      | -.2422732 | .0600793         | -4.03  | 0.000 | -.3600706            | -.1244759 |
| R4      | -.2927718 | .0624387         | -4.69  | 0.000 | -.4151952            | -.1703483 |
| R5      | -.3331775 | .0662792         | -5.03  | 0.000 | -.4631311            | -.203224  |
| R6      | -.1817815 | .065793          | -2.76  | 0.006 | -.3107817            | -.0527812 |
| R8      | -.2300818 | .0598177         | -3.85  | 0.000 | -.3473663            | -.1127973 |
| R9      | -.2411579 | .0604966         | -3.99  | 0.000 | -.3597736            | -.1225422 |
| R10     | -.3658288 | .0547779         | -6.68  | 0.000 | -.4732318            | -.2584258 |
| R11     | -.2802566 | .0539071         | -5.20  | 0.000 | -.3859522            | -.1745611 |
| R12     | -.3271627 | .0540389         | -6.05  | 0.000 | -.4331167            | -.2212087 |
| _cons   | 4.477692  | .1213288         | 36.91  | 0.000 | 4.239803             | 4.715582  |

. estimates store ResultsMen

. \* and women

. regress LnW age age2 Married Q1-Q5 R1-R6 R8-R12 if Female == 1, vce(robust)

Linear regression

Number of obs = 3685  
F( 19, 3665) = 75.17  
Prob > F = 0.0000  
R-squared = 0.2884  
Root MSE = .67667

| LnW     | Coef.     | Robust Std. Err. | t      | P> t  | [95% Conf. Interval] |           |
|---------|-----------|------------------|--------|-------|----------------------|-----------|
| age     | .1157469  | .0061697         | 18.76  | 0.000 | .1036505             | .1278434  |
| age2    | -.0013265 | .0000771         | -17.21 | 0.000 | -.0014776            | -.0011755 |
| Married | -.0327202 | .0245923         | -1.33  | 0.183 | -.0809362            | .0154959  |
| Q1      | .879351   | .0440968         | 19.94  | 0.000 | .7928943             | .9658077  |
| Q2      | .5932097  | .0565818         | 10.48  | 0.000 | .4822748             | .7041447  |
| Q3      | .3704825  | .0442011         | 8.38   | 0.000 | .2838214             | .4571436  |
| Q4      | .212737   | .0427821         | 4.97   | 0.000 | .128858              | .2966161  |
| Q5      | .0704396  | .0573601         | 1.23   | 0.220 | -.0420214            | .1829006  |
| R1      | -.2508162 | .0771073         | -3.25  | 0.001 | -.4019936            | -.0996388 |
| R2      | -.3379547 | .0709184         | -4.77  | 0.000 | -.4769982            | -.1989112 |
| R3      | -.3247389 | .0704872         | -4.61  | 0.000 | -.4629369            | -.1865409 |
| R4      | -.3955709 | .0727315         | -5.44  | 0.000 | -.5381691            | -.2529728 |
| R5      | -.3825186 | .0760007         | -5.03  | 0.000 | -.5315264            | -.2335108 |
| R6      | -.3158734 | .0764549         | -4.13  | 0.000 | -.4657717            | -.165975  |
| R8      | -.3327406 | .0694428         | -4.79  | 0.000 | -.468891             | -.1965902 |
| R9      | -.3891743 | .0721264         | -5.40  | 0.000 | -.5305862            | -.2477624 |
| R10     | -.4083766 | .0620517         | -6.58  | 0.000 | -.5300359            | -.2867174 |
| R11     | -.3587405 | .0610653         | -5.87  | 0.000 | -.4784658            | -.2390153 |
| R12     | -.3467539 | .0627197         | -5.53  | 0.000 | -.4697229            | -.223785  |
| _cons   | 4.651776  | .1271073         | 36.60  | 0.000 | 4.402568             | 4.900984  |

. estimates store ResultsWomen

.  
.  
.  
.  
\* 8.3 Estimating Weighted Regression Models  
\*-----

```

.
. * Add in psu and strata variables from rhhsamp using link variable rhid
. * The variable identifying households in the rhhsamp file is called rhid
. * while above we have renamed it hid
. generate double rhid = hid

```

```

. merge m:1 rhid using "$datadir\rhhsamp", keepusing(rhid rpsu rstrata)
(label rregion2 already defined)
(label rregion already defined)

```

| Result      | # of obs.          |
|-------------|--------------------|
| not matched | 3,293              |
| from master | 0 (_merge==1)      |
| from using  | 3,293 (_merge==2)  |
| matched     | 14,419 (_merge==3) |

```

. keep if _merge == 3
(3293 observations deleted)

```

```

. drop _merge

```

```

. rename rpsu psu

```

```

. rename rstrata strata

```

```

. regress LnW age age2 Female Married Q1-Q5

```

| Source   | SS         | df   | MS         | Number of obs = | 6985   |
|----------|------------|------|------------|-----------------|--------|
| Model    | 1730.16543 | 9    | 192.240604 | F( 9, 6975) =   | 470.39 |
| Residual | 2850.54501 | 6975 | .408680288 | Prob > F =      | 0.0000 |
|          |            |      |            | R-squared =     | 0.3777 |
|          |            |      |            | Adj R-squared = | 0.3769 |
| Total    | 4580.71044 | 6984 | .655886375 | Root MSE =      | .63928 |

| LnW     | Coef.     | Std. Err. | t      | P> t  | [95% Conf. Interval] |
|---------|-----------|-----------|--------|-------|----------------------|
| age     | .1270167  | .0036603  | 34.70  | 0.000 | .1198414 .134192     |
| age2    | -.0014477 | .0000442  | -32.75 | 0.000 | -.0015344 -.0013611  |
| Female  | -.5163072 | .015376   | -33.58 | 0.000 | -.5464488 -.4861655  |
| Married | .0832343  | .0187549  | 4.44   | 0.000 | .046469 .1199995     |
| Q1      | .7241378  | .0287271  | 25.21  | 0.000 | .6678239 .7804518    |
| Q2      | .5051909  | .0357219  | 14.14  | 0.000 | .435165 .5752167     |
| Q3      | .2988562  | .0280033  | 10.67  | 0.000 | .2439613 .3537512    |
| Q4      | .1945445  | .02723    | 7.14   | 0.000 | .1411654 .2479235    |
| Q5      | .1258957  | .0395816  | 3.18   | 0.001 | .0483038 .2034877    |
| _cons   | 4.573313  | .0691988  | 66.09  | 0.000 | 4.437663 4.708964    |

```

. estimates store R_Regions

```

```

. regress LnW age age2 Female Married Q1-Q5 R1-R6 R8-R12

```

| Source   | SS         | df   | MS         | Number of obs = | 6933   |
|----------|------------|------|------------|-----------------|--------|
| Model    | 1763.50556 | 20   | 88.1752779 | F( 20, 6912) =  | 217.90 |
| Residual | 2797.04324 | 6912 | .40466482  | Prob > F =      | 0.0000 |
|          |            |      |            | R-squared =     | 0.3867 |
|          |            |      |            | Adj R-squared = | 0.3849 |
| Total    | 4560.54879 | 6932 | .657897979 | Root MSE =      | .63613 |

| LnW     | Coef.     | Std. Err. | t      | P> t  | [95% Conf. Interval] |
|---------|-----------|-----------|--------|-------|----------------------|
| age     | .1277878  | .0036589  | 34.93  | 0.000 | .1206152 .1349604    |
| age2    | -.0014583 | .0000442  | -33.01 | 0.000 | -.0015449 -.0013717  |
| Female  | -.5173127 | .0153669  | -33.66 | 0.000 | -.5474366 -.4871888  |
| Married | .0835274  | .0188041  | 4.44   | 0.000 | .0466656 .1203891    |
| Q1      | .7055081  | .0287987  | 24.50  | 0.000 | .6490539 .7619623    |

|       |           |          |       |       |           |           |
|-------|-----------|----------|-------|-------|-----------|-----------|
| Q2    | .5010076  | .0358421 | 13.98 | 0.000 | .4307461  | .5712691  |
| Q3    | .2901391  | .0280411 | 10.35 | 0.000 | .2351699  | .3451084  |
| Q4    | .1872705  | .0272528 | 6.87  | 0.000 | .1338467  | .2406943  |
| Q5    | .1165528  | .0396332 | 2.94  | 0.003 | .0388596  | .194246   |
| R1    | -.2786627 | .0589121 | -4.73 | 0.000 | -.3941486 | -.1631768 |
| R2    | -.3066754 | .0458084 | -6.69 | 0.000 | -.3964739 | -.2168769 |
| R3    | -.2909338 | .0483127 | -6.02 | 0.000 | -.3856416 | -.196226  |
| R4    | -.3418577 | .0491452 | -6.96 | 0.000 | -.4381973 | -.245518  |
| R5    | -.3572488 | .0496795 | -7.19 | 0.000 | -.4546359 | -.2598618 |
| R6    | -.258527  | .0486662 | -5.31 | 0.000 | -.3539278 | -.1631262 |
| R8    | -.2885082 | .0444103 | -6.50 | 0.000 | -.3755661 | -.2014503 |
| R9    | -.3170754 | .0480772 | -6.60 | 0.000 | -.4113216 | -.2228293 |
| R10   | -.3830289 | .0413105 | -9.27 | 0.000 | -.4640102 | -.3020475 |
| R11   | -.3182777 | .0408353 | -7.79 | 0.000 | -.3983274 | -.238228  |
| R12   | -.3309315 | .0419792 | -7.88 | 0.000 | -.4132236 | -.2486394 |
| _cons | 4.878964  | .0780401 | 62.52 | 0.000 | 4.725981  | 5.031946  |

```

. estimates store R_NoWeights

```

```

. regress LnW age age2 Female Married Q1-Q5 R1-R6 R8-R12 [pweight = xrwtuk1]
(sum of wgt is 7.7209e+03)

```

|                   |                 |        |
|-------------------|-----------------|--------|
| Linear regression | Number of obs = | 6769   |
|                   | F( 20, 6748) =  | 112.82 |
|                   | Prob > F =      | 0.0000 |
|                   | R-squared =     | 0.3869 |
|                   | Root MSE =      | .6493  |

| LnW     | Coef.     | Robust Std. Err. | t      | P> t  | [95% Conf. Interval] |           |
|---------|-----------|------------------|--------|-------|----------------------|-----------|
| age     | .1308828  | .0056207         | 23.29  | 0.000 | .1198645             | .1419012  |
| age2    | -.0014913 | .0000675         | -22.11 | 0.000 | -.0016236            | -.0013591 |
| Female  | -.5496539 | .0205501         | -26.75 | 0.000 | -.5899386            | -.5093692 |
| Married | .0417188  | .0242714         | 1.72   | 0.086 | -.0058608            | .0892984  |
| Q1      | .7029947  | .0408313         | 17.22  | 0.000 | .6229524             | .7830371  |
| Q2      | .4995007  | .0522556         | 9.56   | 0.000 | .3970632             | .6019381  |
| Q3      | .3080371  | .0396209         | 7.77   | 0.000 | .2303676             | .3857066  |
| Q4      | .1890128  | .0396809         | 4.76   | 0.000 | .1112256             | .2667999  |
| Q5      | .1160016  | .0479183         | 2.42   | 0.016 | .0220667             | .2099366  |
| R1      | -.2581424 | .0570714         | -4.52  | 0.000 | -.3700203            | -.1462645 |
| R2      | -.2920184 | .0508405         | -5.74  | 0.000 | -.3916818            | -.1923551 |
| R3      | -.276581  | .0510785         | -5.41  | 0.000 | -.376711             | -.176451  |
| R4      | -.3315176 | .0532502         | -6.23  | 0.000 | -.4359047            | -.2271304 |
| R5      | -.3444206 | .0560619         | -6.14  | 0.000 | -.4543196            | -.2345217 |
| R6      | -.2343718 | .0575599         | -4.07  | 0.000 | -.3472074            | -.1215363 |
| R8      | -.2476696 | .0502791         | -4.93  | 0.000 | -.3462324            | -.1491068 |
| R9      | -.2770463 | .051823          | -5.35  | 0.000 | -.3786358            | -.1754568 |
| R10     | -.3655642 | .0461064         | -7.93  | 0.000 | -.4559473            | -.275181  |
| R11     | -.2813341 | .0446743         | -6.30  | 0.000 | -.3689099            | -.1937583 |
| R12     | -.3047024 | .0453409         | -6.72  | 0.000 | -.3935849            | -.2158199 |
| _cons   | 4.823145  | .1169873         | 41.23  | 0.000 | 4.593813             | 5.052477  |

```

. estimates store R_Weights

```

```

. replace psu = hid if memorig == 7
psu was int now long
(2247 real changes made)

. svyset psu [pw=xrwtuk1], strata(strata)

    pweight: xrwtuk1
      VCE: linearized
Single unit: missing
  Strata 1: strata
    SU 1: psu
    FPC 1: <zero>

```

```
. svy: regress LnW age age2 Female Married Q1-Q5 R1-R6 R8-R12
(running regress on estimation sample)
```

Survey: Linear regression

|                  |   |      |                 |   |           |
|------------------|---|------|-----------------|---|-----------|
| Number of strata | = | 121  | Number of obs   | = | 7449      |
| Number of PSUs   | = | 1051 | Population size | = | 7720.8555 |
|                  |   |      | Design df       | = | 930       |
|                  |   |      | F( 20, 911)     | = | 111.03    |
|                  |   |      | Prob > F        | = | 0.0000    |
|                  |   |      | R-squared       | = | 0.3869    |

| LnW     | Linearized |           | t      | P> t  | [95% Conf. Interval] |           |
|---------|------------|-----------|--------|-------|----------------------|-----------|
|         | Coef.      | Std. Err. |        |       |                      |           |
| age     | .1308828   | .006282   | 20.83  | 0.000 | .1185543             | .1432114  |
| age2    | -.0014913  | .0000744  | -20.04 | 0.000 | -.0016374            | -.0013453 |
| Female  | -.5496539  | .0210723  | -26.08 | 0.000 | -.5910087            | -.5082991 |
| Married | .0417188   | .0228738  | 1.82   | 0.068 | -.0031715            | .0866091  |
| Q1      | .7029947   | .0441149  | 15.94  | 0.000 | .6164185             | .789571   |
| Q2      | .4995007   | .0520258  | 9.60   | 0.000 | .3973992             | .6016021  |
| Q3      | .3080371   | .0409191  | 7.53   | 0.000 | .2277326             | .3883416  |
| Q4      | .1890128   | .0416538  | 4.54   | 0.000 | .1072664             | .2707592  |
| Q5      | .1160016   | .0516338  | 2.25   | 0.025 | .0146693             | .2173339  |
| R1      | -.2581424  | .0602998  | -4.28  | 0.000 | -.3764818            | -.139803  |
| R2      | -.2920184  | .0439435  | -6.65  | 0.000 | -.3782584            | -.2057785 |
| R3      | -.276581   | .0476351  | -5.81  | 0.000 | -.3700658            | -.1830962 |
| R4      | -.3315176  | .0470253  | -7.05  | 0.000 | -.4238056            | -.2392295 |
| R5      | -.3444206  | .0545619  | -6.31  | 0.000 | -.4514994            | -.2373419 |
| R6      | -.2343718  | .0596534  | -3.93  | 0.000 | -.3514428            | -.1173009 |
| R8      | -.2476696  | .0467212  | -5.30  | 0.000 | -.3393608            | -.1559783 |
| R9      | -.2770463  | .0489909  | -5.66  | 0.000 | -.3731918            | -.1809008 |
| R10     | -.3655642  | .0419731  | -8.71  | 0.000 | -.4479371            | -.2831912 |
| R11     | -.2813341  | .0421597  | -6.67  | 0.000 | -.3640734            | -.1985948 |
| R12     | -.3047024  | .0415092  | -7.34  | 0.000 | -.386165             | -.2232398 |
| _cons   | 4.823145   | .1268506  | 38.02  | 0.000 | 4.574198             | 5.072091  |

```
. estimates store R_SampleDesign
```

```
.
. * Save the results in a table *
. * See Chapter 14 *
. *****
.
. * Table 8.1
. quietly estout R_Regions R_NoWeights R_Weights R_SampleDesign ///
> using "WageModels.out", ///
> cells(b(star fmt(%9.3f)) se(par fmt(%9.3f))) ///
> style(tab) stats(r2 N, fmt(%9.3f %9.0g) ///
> labels(R2 Observations)) label collabels(, none) ///
> starlevels(+ 0.05 * 0.01) ///
> postfoot("St. err. in parenthesis; + Significant 5%, * Significant 1%") ///
> replace

.
.
. * 8.4. Binary Variables
. * 8.4.1. Linear and Non-linear models
. *-----
.
. * jbstat: current economic activity
. recode jbstat (1 2 = 1) (3/10 = 0), gen(Employed)
(13412 differences between jbstat and Employed)

. label define Employed 1 "Employed/Self-Employed" 2 "Unemployed or Inactive"

. label value Employed Employed

.
. regress Employed age age2 Married Q1-Q5 R1-R6 R8-R12 if Female == 0
```

| Source   | SS         | df   | MS         | Number of obs = | 5940   |
|----------|------------|------|------------|-----------------|--------|
| Model    | 558.396592 | 19   | 29.3892943 | F( 19, 5920) =  | 211.92 |
| Residual | 821.003408 | 5920 | .138683008 | Prob > F =      | 0.0000 |
|          |            |      |            | R-squared =     | 0.4048 |
|          |            |      |            | Adj R-squared = | 0.4029 |
| Total    | 1379.4     | 5939 | .232261323 | Root MSE =      | .3724  |

| Employed | Coef.     | Std. Err. | t      | P> t  | [95% Conf. Interval] |           |
|----------|-----------|-----------|--------|-------|----------------------|-----------|
| age      | .0458287  | .001493   | 30.70  | 0.000 | .0429018             | .0487556  |
| age2     | -.0005592 | .0000148  | -37.87 | 0.000 | -.0005882            | -.0005303 |
| Married  | .1201092  | .0120352  | 9.98   | 0.000 | .0965158             | .1437025  |
| Q1       | .1993653  | .0166232  | 11.99  | 0.000 | .1667778             | .2319528  |
| Q2       | .1363423  | .020626   | 6.61   | 0.000 | .0959078             | .1767767  |
| Q3       | .1071289  | .0152612  | 7.02   | 0.000 | .0772113             | .1370464  |
| Q4       | .124841   | .0149177  | 8.37   | 0.000 | .0955968             | .1540851  |
| Q5       | .1644242  | .0247038  | 6.66   | 0.000 | .1159958             | .2128526  |
| R1       | -.0616644 | .0387444  | -1.59  | 0.112 | -.1376176            | .0142888  |
| R2       | -.053881  | .0300772  | -1.79  | 0.073 | -.1128433            | .0050813  |
| R3       | -.0265466 | .0311654  | -0.85  | 0.394 | -.0876421            | .0345489  |
| R4       | -.0352551 | .0320938  | -1.10  | 0.272 | -.0981707            | .0276606  |
| R5       | .0058044  | .0327448  | 0.18   | 0.859 | -.0583873            | .0699962  |
| R6       | -.0237179 | .0313097  | -0.76  | 0.449 | -.0850963            | .0376605  |
| R8       | -.0001204 | .0295816  | -0.00  | 0.997 | -.0581112            | .0578703  |
| R9       | .0061724  | .0313138  | 0.20   | 0.844 | -.055214             | .0675588  |
| R10      | -.0515056 | .0269569  | -1.91  | 0.056 | -.104351             | .0013399  |
| R11      | -.0296591 | .0269214  | -1.10  | 0.271 | -.0824347            | .0231166  |
| R12      | -.0797261 | .0272793  | -2.92  | 0.003 | -.1332034            | -.0262487 |
| _cons    | -.242146  | .0411605  | -5.88  | 0.000 | -.3228355            | -.1614565 |

. probit Employed age age2 Married Q1-Q5 R1-R6 R8-R12 if Female == 0

Iteration 0: log likelihood = -3903.5171  
Iteration 1: log likelihood = -2374.8328  
Iteration 2: log likelihood = -2338.7052  
Iteration 3: log likelihood = -2338.5193  
Iteration 4: log likelihood = -2338.5193

|                             |                 |         |
|-----------------------------|-----------------|---------|
| Probit regression           | Number of obs = | 5940    |
|                             | LR chi2(19) =   | 3130.00 |
|                             | Prob > chi2 =   | 0.0000  |
| Log likelihood = -2338.5193 | Pseudo R2 =     | 0.4009  |

| Employed | Coef.     | Std. Err. | z      | P> z  | [95% Conf. Interval] |           |
|----------|-----------|-----------|--------|-------|----------------------|-----------|
| age      | .2200136  | .0075631  | 29.09  | 0.000 | .2051902             | .234837   |
| age2     | -.0027216 | .0000835  | -32.58 | 0.000 | -.0028853            | -.0025578 |
| Married  | .4931326  | .051643   | 9.55   | 0.000 | .3919141             | .5943511  |
| Q1       | .7584157  | .0735767  | 10.31  | 0.000 | .614208              | .9026235  |
| Q2       | .5049339  | .0898357  | 5.62   | 0.000 | .3288591             | .6810087  |
| Q3       | .3788537  | .0617057  | 6.14   | 0.000 | .2579127             | .4997948  |
| Q4       | .46473    | .0616138  | 7.54   | 0.000 | .3439692             | .5854907  |
| Q5       | .545053   | .1032919  | 5.28   | 0.000 | .3426045             | .7475015  |
| R1       | -.3251041 | .1685243  | -1.93  | 0.054 | -.6554057            | .0051976  |
| R2       | -.2565466 | .1328258  | -1.93  | 0.053 | -.5168803            | .0037872  |
| R3       | -.1615072 | .1388417  | -1.16  | 0.245 | -.433632             | .1106176  |
| R4       | -.207326  | .140309   | -1.48  | 0.140 | -.4823266            | .0676746  |
| R5       | .0904659  | .1482148  | 0.61   | 0.542 | -.2000298            | .3809616  |
| R6       | -.0959101 | .1397225  | -0.69  | 0.492 | -.3697611            | .1779408  |
| R8       | .0515328  | .1336144  | 0.39   | 0.700 | -.2103467            | .3134123  |
| R9       | .0260588  | .1416574  | 0.18   | 0.854 | -.2515846            | .3037022  |
| R10      | -.2158928 | .1208026  | -1.79  | 0.074 | -.4526616            | .0208759  |
| R11      | -.1216355 | .1211537  | -1.00  | 0.315 | -.3590923            | .1158213  |
| R12      | -.3415943 | .1217306  | -2.81  | 0.005 | -.5801819            | -.1030068 |
| _cons    | -3.651224 | .1887046  | -19.35 | 0.000 | -4.021079            | -3.28137  |

Note: 16 failures and 0 successes completely determined.

. logit Employed age age2 Married Q1-Q5 R1-R6 R8-R12 if Female == 0

```

Iteration 0: log likelihood = -3903.5171
Iteration 1: log likelihood = -2340.083
Iteration 2: log likelihood = -2325.0702
Iteration 3: log likelihood = -2325.0082
Iteration 4: log likelihood = -2325.0082

```

```

Logistic regression
Number of obs   =      5940
LR chi2(19)    =      3157.02
Prob > chi2     =      0.0000
Pseudo R2      =      0.4044

Log likelihood = -2325.0082

```

| Employed | Coef.     | Std. Err. | z      | P> z  | [95% Conf. Interval] |           |
|----------|-----------|-----------|--------|-------|----------------------|-----------|
| age      | .3930998  | .014043   | 27.99  | 0.000 | .3655761             | .4206235  |
| age2     | -.0048742 | .0001584  | -30.77 | 0.000 | -.0051847            | -.0045637 |
| Married  | .8708715  | .0930483  | 9.36   | 0.000 | .6885002             | 1.053243  |
| Q1       | 1.270692  | .1327634  | 9.57   | 0.000 | 1.01048              | 1.530903  |
| Q2       | .862255   | .1607684  | 5.36   | 0.000 | .5471546             | 1.177355  |
| Q3       | .6347254  | .1079846  | 5.88   | 0.000 | .4230794             | .8463713  |
| Q4       | .8366904  | .1096673  | 7.63   | 0.000 | .6217465             | 1.051634  |
| Q5       | .967299   | .1865986  | 5.18   | 0.000 | .6015725             | 1.333026  |
| R1       | -.5854061 | .3007329  | -1.95  | 0.052 | -1.174832            | .0040196  |
| R2       | -.4663927 | .2381768  | -1.96  | 0.050 | -.9332106            | .0004251  |
| R3       | -.2992171 | .2485978  | -1.20  | 0.229 | -.7864598            | .1880255  |
| R4       | -.3771497 | .2528525  | -1.49  | 0.136 | -.8727315            | .1184321  |
| R5       | .0918717  | .2690435  | 0.34   | 0.733 | -.4354439            | .6191872  |
| R6       | -.148681  | .2533863  | -0.59  | 0.557 | -.6453091            | .3479471  |
| R8       | .0417137  | .2411467  | 0.17   | 0.863 | -.4309252            | .5143526  |
| R9       | .0341559  | .2561193  | 0.13   | 0.894 | -.4678286            | .5361404  |
| R10      | -.39651   | .2177851  | -1.82  | 0.069 | -.8233609            | .0303409  |
| R11      | -.22711   | .2185459  | -1.04  | 0.299 | -.6554521            | .2012321  |
| R12      | -.6153422 | .2193408  | -2.81  | 0.005 | -1.045242            | -.1854421 |
| _cons    | -6.496169 | .3398631  | -19.11 | 0.000 | -7.162289            | -5.83005  |

```

.
. * 8.4.2. Coefficients, Marginal Effects, Odd Ratios
. *-----
.
. probit Employed age age2 Married Q1-Q5 R1-R6 R8-R12 if Female == 0

```

```

Iteration 0: log likelihood = -3903.5171
Iteration 1: log likelihood = -2374.8328
Iteration 2: log likelihood = -2338.7052
Iteration 3: log likelihood = -2338.5193
Iteration 4: log likelihood = -2338.5193

```

```

Probit regression
Number of obs   =      5940
LR chi2(19)    =      3130.00
Prob > chi2     =      0.0000
Pseudo R2      =      0.4009

Log likelihood = -2338.5193

```

| Employed | Coef.     | Std. Err. | z      | P> z  | [95% Conf. Interval] |           |
|----------|-----------|-----------|--------|-------|----------------------|-----------|
| age      | .2200136  | .0075631  | 29.09  | 0.000 | .2051902             | .234837   |
| age2     | -.0027216 | .0000835  | -32.58 | 0.000 | -.0028853            | -.0025578 |
| Married  | .4931326  | .051643   | 9.55   | 0.000 | .3919141             | .5943511  |
| Q1       | .7584157  | .0735767  | 10.31  | 0.000 | .614208              | .9026235  |
| Q2       | .5049339  | .0898357  | 5.62   | 0.000 | .3288591             | .6810087  |
| Q3       | .3788537  | .0617057  | 6.14   | 0.000 | .2579127             | .4997948  |
| Q4       | .46473    | .0616138  | 7.54   | 0.000 | .3439692             | .5854907  |
| Q5       | .545053   | .1032919  | 5.28   | 0.000 | .3426045             | .7475015  |
| R1       | -.3251041 | .1685243  | -1.93  | 0.054 | -.6554057            | .0051976  |
| R2       | -.2565466 | .1328258  | -1.93  | 0.053 | -.5168803            | .0037872  |
| R3       | -.1615072 | .1388417  | -1.16  | 0.245 | -.433632             | .1106176  |
| R4       | -.207326  | .140309   | -1.48  | 0.140 | -.4823266            | .0676746  |
| R5       | .0904659  | .1482148  | 0.61   | 0.542 | -.2000298            | .3809616  |
| R6       | -.0959101 | .1397225  | -0.69  | 0.492 | -.3697611            | .1779408  |
| R8       | .0515328  | .1336144  | 0.39   | 0.700 | -.2103467            | .3134123  |
| R9       | .0260588  | .1416574  | 0.18   | 0.854 | -.2515846            | .3037022  |
| R10      | -.2158928 | .1208026  | -1.79  | 0.074 | -.4526616            | .0208759  |

Note: 16 failures and 0 successes completely determined.

```
> dydx(age age2 Married Q1 Q2 Q3 Q4 Q5 R1 R2 R3 R4 R5 R6 R8 R9 R10 R11 R12)
```

```
Expression      : Pr(Employed), predict()
dy/dx w.r.t.   : age age2 Married Q1 Q2 Q3 Q4 Q5 R1 R2 R3 R4 R5 R6 R8 R9 R10 R11 R12
```

|                             |               |   |         |
|-----------------------------|---------------|---|---------|
| Probit regression           | Number of obs | = | 5940    |
|                             | LR chi2(19)   | = | 3130.00 |
|                             | Prob > chi2   | = | 0.0000  |
| Log likelihood = -2338.5193 | Pseudo R2     | = | 0.4009  |

| Employed  | Coef.     | Std. Err. | z      | P> z  | [95% Conf. Interval] |           |
|-----------|-----------|-----------|--------|-------|----------------------|-----------|
| age       | .2200136  | .0075631  | 29.09  | 0.000 | .2051902             | .234837   |
| age2      | -.0027216 | .0000835  | -32.58 | 0.000 | -.0028853            | -.0025578 |
| 1.Married | .4931326  | .051643   | 9.55   | 0.000 | .3919141             | .5943511  |
| 1.Q1      | .7584157  | .0735767  | 10.31  | 0.000 | .614208              | .9026235  |
| 1.Q2      | .5049339  | .0898357  | 5.62   | 0.000 | .3288591             | .6810087  |
| 1.Q3      | .3788537  | .0617057  | 6.14   | 0.000 | .2579127             | .4997948  |
| 1.Q4      | .46473    | .0616138  | 7.54   | 0.000 | .3439692             | .5854907  |
| 1.Q5      | .545053   | .1032919  | 5.28   | 0.000 | .3426045             | .7475015  |
| 1.R1      | -.3251041 | .1685243  | -1.93  | 0.054 | -.6554057            | .0051976  |
| 1.R2      | -.2565466 | .1328258  | -1.93  | 0.053 | -.5168803            | .0037872  |
| 1.R3      | -.1615072 | .1388417  | -1.16  | 0.245 | -.433632             | .1106176  |
| 1.R4      | -.207326  | .140309   | -1.48  | 0.140 | -.4823266            | .0676746  |
| 1.R5      | .0904659  | .1482148  | 0.61   | 0.542 | -.2000298            | .3809616  |
| 1.R6      | -.0959101 | .1397225  | -0.69  | 0.492 | -.3697611            | .1779408  |
| 1.R8      | .0515328  | .1336144  | 0.39   | 0.700 | -.2103467            | .3134123  |
| 1.R9      | .0260588  | .1416574  | 0.18   | 0.854 | -.2515846            | .3037022  |

|       |           |          |        |       |           |           |
|-------|-----------|----------|--------|-------|-----------|-----------|
| 1.R10 | -.2158928 | .1208026 | -1.79  | 0.074 | -.4526616 | .0208759  |
| 1.R11 | -.1216355 | .1211537 | -1.00  | 0.315 | -.3590923 | .1158213  |
| 1.R12 | -.3415943 | .1217306 | -2.81  | 0.005 | -.5801819 | -.1030068 |
| _cons | -3.651224 | .1887046 | -19.35 | 0.000 | -4.021079 | -3.28137  |

Note: 16 failures and 0 successes completely determined.

```
. margins, ///
>      dydx(age age2 Married Q1 Q2 Q3 Q4 Q5 R1 R2 R3 R4 R5 R6 R8 R9 R10 R11 R12)

Average marginal effects      Number of obs   =      5940
Model VCE      : OIM

Expression      : Pr(Employed), predict()
dy/dx w.r.t.    : age age2 1.Married 1.Q1 1.Q2 1.Q3 1.Q4 1.Q5 1.R1 1.R2 1.R3 1.R4 1.R5 1.R6 1.R8
                  1.R9 1.R10 1.R11 1.R12
```

|           |           | Delta-method |        |       |                      |           |
|-----------|-----------|--------------|--------|-------|----------------------|-----------|
|           | dy/dx     | Std. Err.    | z      | P> z  | [95% Conf. Interval] |           |
| age       | .0487101  | .0013236     | 36.80  | 0.000 | .0461159             | .0513044  |
| age2      | -.0006025 | .0000135     | -44.55 | 0.000 | -.0006291            | -.000576  |
| 1.Married | .1161915  | .0126079     | 9.22   | 0.000 | .0914805             | .1409025  |
| 1.Q1      | .1533711  | .0130198     | 11.78  | 0.000 | .1278528             | .1788895  |
| 1.Q2      | .1019713  | .0162217     | 6.29   | 0.000 | .0701774             | .1337652  |
| 1.Q3      | .0809203  | .0125951     | 6.42   | 0.000 | .0562344             | .1056063  |
| 1.Q4      | .0976351  | .0121324     | 8.05   | 0.000 | .0738561             | .1214141  |
| 1.Q5      | .1086241  | .0181684     | 5.98   | 0.000 | .0730147             | .1442336  |
| 1.R1      | -.0761223 | .0413966     | -1.84  | 0.066 | -.1572581            | .0050135  |
| 1.R2      | -.0591525 | .0317442     | -1.86  | 0.062 | -.1213699            | .003065   |
| 1.R3      | -.0367343 | .0323818     | -1.13  | 0.257 | -.1002015            | .026733   |
| 1.R4      | -.0475006 | .0331625     | -1.43  | 0.152 | -.1124978            | .0174967  |
| 1.R5      | .0196944  | .031706      | 0.62   | 0.534 | -.0424483            | .0818371  |
| 1.R6      | -.0215857 | .031944      | -0.68  | 0.499 | -.0841948            | .0410233  |
| 1.R8      | .0113116  | .0290711     | 0.39   | 0.697 | -.0456667            | .0682899  |
| 1.R9      | .0057428  | .031073      | 0.18   | 0.853 | -.0551592            | .0666448  |
| 1.R10     | -.0491829 | .0282346     | -1.74  | 0.082 | -.1045217            | .0061558  |
| 1.R11     | -.0273432 | .0276284     | -0.99  | 0.322 | -.0814938            | .0268074  |
| 1.R12     | -.0793679 | .0294466     | -2.70  | 0.007 | -.1370823            | -.0216536 |

Note: dy/dx for factor levels is the discrete change from the base level.

```
.
. logit Employed age age2 i.Married i.Q1-Q5 i.R1-R6 i.R8-R12 if Female == 0
```

```
Iteration 0:  log likelihood = -3903.5171
Iteration 1:  log likelihood = -2340.083
Iteration 2:  log likelihood = -2325.0702
Iteration 3:  log likelihood = -2325.0082
Iteration 4:  log likelihood = -2325.0082
```

|                             |               |   |         |
|-----------------------------|---------------|---|---------|
| Logistic regression         | Number of obs | = | 5940    |
|                             | LR chi2(19)   | = | 3157.02 |
|                             | Prob > chi2   | = | 0.0000  |
| Log likelihood = -2325.0082 | Pseudo R2     | = | 0.4044  |

|           | Employed | Coef.     | Std. Err. | z      | P> z  | [95% Conf. Interval] |           |
|-----------|----------|-----------|-----------|--------|-------|----------------------|-----------|
| age       |          | .3930998  | .014043   | 27.99  | 0.000 | .3655761             | .4206235  |
| age2      |          | -.0048742 | .0001584  | -30.77 | 0.000 | -.0051847            | -.0045637 |
| 1.Married |          | .8708715  | .0930483  | 9.36   | 0.000 | .6885002             | 1.053243  |
| 1.Q1      |          | 1.270692  | .1327634  | 9.57   | 0.000 | 1.01048              | 1.530903  |
| 1.Q2      |          | .862255   | .1607684  | 5.36   | 0.000 | .5471546             | 1.177355  |
| 1.Q3      |          | .6347254  | .1079846  | 5.88   | 0.000 | .4230794             | .8463713  |
| 1.Q4      |          | .8366904  | .1096673  | 7.63   | 0.000 | .6217465             | 1.051634  |
| 1.Q5      |          | .967299   | .1865986  | 5.18   | 0.000 | .6015725             | 1.333026  |
| 1.R1      |          | -.5854061 | .3007329  | -1.95  | 0.052 | -1.174832            | .0040196  |
| 1.R2      |          | -.4663927 | .2381768  | -1.96  | 0.050 | -.9332106            | .0004251  |
| 1.R3      |          | -.2992171 | .2485978  | -1.20  | 0.229 | -.7864598            | .1880255  |
| 1.R4      |          | -.3771497 | .2528525  | -1.49  | 0.136 | -.8727315            | .1184321  |
| 1.R5      |          | .0918717  | .2690435  | 0.34   | 0.733 | -.4354439            | .6191872  |



```
. margins, ///
>          dydx(age age2 Married Q1 Q2 Q3 Q4 Q5 R1 R2 R3 R4 R5 R6 R8 R9 R10 R11 R12)

Average marginal effects          Number of obs   =          5940
Model VCE      : OIM

Expression      : Pr(Employed), predict()
dy/dx w.r.t.    : age age2 1.Married 1.Q1 1.Q2 1.Q3 1.Q4 1.Q5 1.R1 1.R2 1.R3 1.R4 1.R5 1.R6 1.R8
                  1.R9 1.R10 1.R11 1.R12
```

|           | Delta-method |           |        |       | [95% Conf. Interval] |           |
|-----------|--------------|-----------|--------|-------|----------------------|-----------|
|           | dy/dx        | Std. Err. | z      | P> z  |                      |           |
| age       | .0486419     | .0012579  | 38.67  | 0.000 | .0461765             | .0511073  |
| age2      | -.0006031    | .0000129  | -46.72 | 0.000 | -.0006284            | -.0005778 |
| 1.Married | .114972      | .0126901  | 9.06   | 0.000 | .0901                | .1398441  |
| 1.Q1      | .1444504     | .0132563  | 10.90  | 0.000 | .1184685             | .1704323  |
| 1.Q2      | .0977044     | .0163436  | 5.98   | 0.000 | .0656715             | .1297372  |
| 1.Q3      | .0759591     | .0123862  | 6.13   | 0.000 | .0516826             | .1002357  |
| 1.Q4      | .0979937     | .0119651  | 8.19   | 0.000 | .0745426             | .1214447  |
| 1.Q5      | .1076635     | .0182892  | 5.89   | 0.000 | .0718173             | .1435096  |
| 1.R1      | -.0768672    | .041598   | -1.85  | 0.065 | -.1583978            | .0046635  |
| 1.R2      | -.0602797    | .0320087  | -1.88  | 0.060 | -.1230156            | .0024562  |
| 1.R3      | -.0381171    | .0325441  | -1.17  | 0.242 | -.1019023            | .0256681  |
| 1.R4      | -.0483994    | .0335534  | -1.44  | 0.149 | -.1141629            | .0173641  |
| 1.R5      | .0112575     | .0326401  | 0.34   | 0.730 | -.0527159            | .0752309  |
| 1.R6      | -.0186722    | .0322821  | -0.58  | 0.563 | -.081944             | .0445996  |
| 1.R8      | .0051411     | .0296008  | 0.17   | 0.862 | -.0528754            | .0631575  |
| 1.R9      | .0042117     | .0314701  | 0.13   | 0.894 | -.0574686            | .065892   |
| 1.R10     | -.050578     | .0285574  | -1.77  | 0.077 | -.1065494            | .0053935  |
| 1.R11     | -.0285845    | .0279517  | -1.02  | 0.306 | -.0833687            | .0261998  |
| 1.R12     | -.0800822    | .0298078  | -2.69  | 0.007 | -.1385044            | -.02166   |

Note:  $dy/dx$  for factor levels is the discrete change from the base level.

```
. logit Employed age age2 Married Q1-Q5 R1-R6 R8-R12 if Female == 0, or
```

```
Iteration 0:    log likelihood = -3903.5171
Iteration 1:    log likelihood = -2340.083
Iteration 2:    log likelihood = -2325.0702
Iteration 3:    log likelihood = -2325.0082
Iteration 4:    log likelihood = -2325.0082
```

|                             |               |   |         |
|-----------------------------|---------------|---|---------|
| Logistic regression         | Number of obs | = | 5940    |
|                             | LR chi2(19)   | = | 3157.02 |
|                             | Prob > chi2   | = | 0.0000  |
| Log likelihood = -2325.0082 | Pseudo R2     | = | 0.4044  |

| Employed | Odds Ratio | Std. Err. | z      | P> z  | [95% Conf. Interval] |          |
|----------|------------|-----------|--------|-------|----------------------|----------|
| age      | 1.481566   | .0208056  | 27.99  | 0.000 | 1.441344             | 1.522911 |
| age2     | .9951377   | .0001577  | -30.77 | 0.000 | .9948287             | .9954467 |
| Married  | 2.388992   | .2222915  | 9.36   | 0.000 | 1.990728             | 2.866933 |
| Q1       | 3.563317   | .4730782  | 9.57   | 0.000 | 2.74692              | 4.622351 |
| Q2       | 2.368496   | .3807793  | 5.36   | 0.000 | 1.728328             | 3.245779 |
| Q3       | 1.886504   | .2037134  | 5.88   | 0.000 | 1.526656             | 2.331172 |
| Q4       | 2.308713   | .2531903  | 7.63   | 0.000 | 1.862178             | 2.862325 |
| Q5       | 2.630829   | .490909   | 5.18   | 0.000 | 1.824986             | 3.792501 |
| R1       | .5568797   | .167472   | -1.95  | 0.052 | .3088709             | 1.004028 |
| R2       | .6272609   | .149399   | -1.96  | 0.050 | .393289              | 1.000425 |
| R3       | .7413984   | .18431    | -1.20  | 0.229 | .4554543             | 1.206864 |

|       |          |          |        |       |          |          |
|-------|----------|----------|--------|-------|----------|----------|
| R4    | .6858134 | .1734096 | -1.49  | 0.136 | .4178088 | 1.12573  |
| R5    | 1.096224 | .294932  | 0.34   | 0.733 | .6469774 | 1.857418 |
| R6    | .861844  | .2183795 | -0.59  | 0.557 | .5245004 | 1.416157 |
| R8    | 1.042596 | .2514186 | 0.17   | 0.863 | .6499075 | 1.672555 |
| R9    | 1.034746 | .2650184 | 0.13   | 0.894 | .6263608 | 1.709397 |
| R10   | .6726636 | .1464961 | -1.82  | 0.069 | .4389539 | 1.030806 |
| R11   | .7968331 | .1741446 | -1.04  | 0.299 | .5192073 | 1.222909 |
| R12   | .5404559 | .118544  | -2.81  | 0.005 | .3516066 | .8307369 |
| _cons | .0015092 | .0005129 | -19.11 | 0.000 | .0007753 | .0029379 |

. \* 8.4.3. Different Types of Standard Errors and Other Post-estimation commands

. probit Employed age age2 Married Q1-Q5 R1-R6 R8-R12 if Female == 0, vce(robust)

Iteration 0: log pseudolikelihood = -3903.5171  
Iteration 1: log pseudolikelihood = -2374.8328  
Iteration 2: log pseudolikelihood = -2338.7052  
Iteration 3: log pseudolikelihood = -2338.5193  
Iteration 4: log pseudolikelihood = -2338.5193

|                                   |               |   |         |
|-----------------------------------|---------------|---|---------|
| Probit regression                 | Number of obs | = | 5940    |
|                                   | Wald chi2(19) | = | 1229.89 |
|                                   | Prob > chi2   | = | 0.0000  |
| Log pseudolikelihood = -2338.5193 | Pseudo R2     | = | 0.4009  |

| Employed | Coef.     | Robust Std. Err. | z      | P> z  | [95% Conf. Interval] |           |
|----------|-----------|------------------|--------|-------|----------------------|-----------|
| age      | .2200136  | .009073          | 24.25  | 0.000 | .2022309             | .2377963  |
| age2     | -.0027216 | .0001047         | -26.01 | 0.000 | -.0029267            | -.0025165 |
| Married  | .4931326  | .0528681         | 9.33   | 0.000 | .3895131             | .5967521  |
| Q1       | .7584157  | .0753342         | 10.07  | 0.000 | .6107634             | .906068   |
| Q2       | .5049339  | .0875708         | 5.77   | 0.000 | .3332984             | .6765694  |
| Q3       | .3788537  | .061789          | 6.13   | 0.000 | .2577495             | .499958   |
| Q4       | .46473    | .0636752         | 7.30   | 0.000 | .3399288             | .5895311  |
| Q5       | .545053   | .10748           | 5.07   | 0.000 | .3343961             | .7557099  |
| R1       | -.3251041 | .1659511         | -1.96  | 0.050 | -.6503621            | .000154   |
| R2       | -.2565466 | .1319917         | -1.94  | 0.052 | -.5152455            | .0021524  |
| R3       | -.1615072 | .1357756         | -1.19  | 0.234 | -.4276226            | .1046081  |
| R4       | -.207326  | .1417011         | -1.46  | 0.143 | -.485055             | .0704031  |
| R5       | .0904659  | .1582161         | 0.57   | 0.567 | -.2196319            | .4005637  |
| R6       | -.0959101 | .1405627         | -0.68  | 0.495 | -.371408             | .1795878  |
| R8       | .0515328  | .135174          | 0.38   | 0.703 | -.2134034            | .3164689  |
| R9       | .0260588  | .143673          | 0.18   | 0.856 | -.2555351            | .3076527  |
| R10      | -.2158928 | .1200073         | -1.80  | 0.072 | -.4511028            | .0193171  |
| R11      | -.1216355 | .1197628         | -1.02  | 0.310 | -.3563663            | .1130952  |
| R12      | -.3415943 | .1209514         | -2.82  | 0.005 | -.5786546            | -.104534  |
| _cons    | -3.651224 | .2006922         | -18.19 | 0.000 | -4.044574            | -3.257875 |

Note: 16 failures and 0 successes completely determined.

. logit Employed age age2 Married Q1-Q5 R1-R6 R8-R12 if Female == 0, vce(robust)

Iteration 0: log pseudolikelihood = -3903.5171  
Iteration 1: log pseudolikelihood = -2340.083  
Iteration 2: log pseudolikelihood = -2325.0702  
Iteration 3: log pseudolikelihood = -2325.0082  
Iteration 4: log pseudolikelihood = -2325.0082

|                                   |               |   |         |
|-----------------------------------|---------------|---|---------|
| Logistic regression               | Number of obs | = | 5940    |
|                                   | Wald chi2(19) | = | 1267.41 |
|                                   | Prob > chi2   | = | 0.0000  |
| Log pseudolikelihood = -2325.0082 | Pseudo R2     | = | 0.4044  |

| Employed | Coef.    | Robust Std. Err. | z     | P> z  | [95% Conf. Interval] |          |
|----------|----------|------------------|-------|-------|----------------------|----------|
| age      | .3930998 | .0150316         | 26.15 | 0.000 | .3636384             | .4225612 |

|         |           |          |        |       |           |           |
|---------|-----------|----------|--------|-------|-----------|-----------|
| age2    | -.0048742 | .0001721 | -28.33 | 0.000 | -.0052114 | -.0045369 |
| Married | .8708715  | .0953178 | 9.14   | 0.000 | .6840519  | 1.057691  |
| Q1      | 1.270692  | .1308689 | 9.71   | 0.000 | 1.014194  | 1.52719   |
| Q2      | .862255   | .1576797 | 5.47   | 0.000 | .5532084  | 1.171302  |
| Q3      | .6347254  | .1089535 | 5.83   | 0.000 | .4211805  | .8482703  |
| Q4      | .8366904  | .1137077 | 7.36   | 0.000 | .6138274  | 1.059553  |
| Q5      | .967299   | .197858  | 4.89   | 0.000 | .5795044  | 1.355094  |
| R1      | -.5854061 | .2994373 | -1.96  | 0.051 | -1.172292 | .0014802  |
| R2      | -.4663927 | .2377597 | -1.96  | 0.050 | -.9323932 | -.0003923 |
| R3      | -.2992171 | .2462149 | -1.22  | 0.224 | -.7817894 | .1833551  |
| R4      | -.3771497 | .2609185 | -1.45  | 0.148 | -.8885405 | .1342411  |
| R5      | .0918717  | .2771202 | 0.33   | 0.740 | -.4512739 | .6350173  |
| R6      | -.148681  | .2580487 | -0.58  | 0.564 | -.6544472 | .3570851  |
| R8      | .0417137  | .2445754 | 0.17   | 0.865 | -.4376453 | .5210727  |
| R9      | .0341559  | .2596905 | 0.13   | 0.895 | -.4748282 | .54314    |
| R10     | -.39651   | .2192277 | -1.81  | 0.071 | -.8261883 | .0331683  |
| R11     | -.22711   | .2196934 | -1.03  | 0.301 | -.6577012 | .2034812  |
| R12     | -.6153422 | .2214674 | -2.78  | 0.005 | -1.04941  | -.181274  |
| _cons   | -6.496169 | .3457602 | -18.79 | 0.000 | -7.173847 | -5.818492 |

```

.
. * 8.5. Multiple Outcomes
. * 8.5.1. Ordered Outcomes
. -----
.
. generate Unemployed = 1 if jbstat == 3
(13923 missing values generated)

. replace Unemployed = 0 if jbstat == 1 | jbstat == 2
(8181 real changes made)

.
. * lfsato: satisfaction with: life overall
. tab lfsato Unemployed, miss

```

| satisfaction with:            | Unemployed |     |       | Total  |
|-------------------------------|------------|-----|-------|--------|
| life overall                  | 0          | 1   | .     |        |
| -----+-----+-----+-----+----- |            |     |       |        |
| not satisfied at all          | 33         | 17  | 108   | 158    |
| 2                             | 85         | 25  | 147   | 257    |
| 3                             | 348        | 63  | 351   | 762    |
| not satis/dissat              | 983        | 88  | 688   | 1,759  |
| 5                             | 2,700      | 128 | 1,374 | 4,202  |
| 6                             | 2,893      | 93  | 1,606 | 4,592  |
| completely satisfied          | 670        | 49  | 968   | 1,687  |
| .                             | 469        | 33  | 500   | 1,002  |
| -----+-----+-----+-----+----- |            |     |       |        |
| Total                         | 8,181      | 496 | 5,742 | 14,419 |

```

.
. oprobit lfsato i.Unemployed i.Female age age2 i.Married i.Q1-Q5 i.R1-R6 i.R8-R12

```

```

Iteration 0: log likelihood = -10995.744
Iteration 1: log likelihood = -10829.266
Iteration 2: log likelihood = -10829.236
Iteration 3: log likelihood = -10829.236

```

```

Ordered probit regression              Number of obs   =       7539
                                      LR chi2(21)        =       333.02
                                      Prob > chi2         =       0.0000
Log likelihood = -10829.236           Pseudo R2        =       0.0151

```

| lfsato       | Coef.     | Std. Err. | z      | P> z  | [95% Conf. Interval] |           |
|--------------|-----------|-----------|--------|-------|----------------------|-----------|
| 1.Unemployed | -.4828452 | .0541581  | -8.92  | 0.000 | -.5889931            | -.3766974 |
| 1.Female     | .0171765  | .0242933  | 0.71   | 0.480 | -.0304375            | .0647904  |
| age          | -.068527  | .0059152  | -11.58 | 0.000 | -.0801206            | -.0569334 |
| age2         | .0008033  | .0000698  | 11.51  | 0.000 | .0006665             | .0009401  |
| 1.Married    | .3405748  | .0295841  | 11.51  | 0.000 | .2825909             | .3985587  |
| 1.Q1         | -.0130264 | .0442507  | -0.29  | 0.768 | -.0997562            | .0737034  |





|       |           |          |           |           |
|-------|-----------|----------|-----------|-----------|
| /cut3 | -4.596357 | .2364244 | -5.05974  | -4.132973 |
| /cut4 | -3.358247 | .2331987 | -3.815308 | -2.901186 |
| /cut5 | -1.752493 | .2311702 | -2.205579 | -1.299408 |
| /cut6 | .4595112  | .2312727 | .006225   | .9127974  |

```
. regress lfsato Unemployed Female age age2 Married Q1-Q5 R1-R6 R8-R12
```

| Source   | SS         | df   | MS         | Number of obs = | 7539   |
|----------|------------|------|------------|-----------------|--------|
| Model    | 419.258833 | 21   | 19.9647063 | F( 21, 7517) =  | 17.19  |
| Residual | 8730.33156 | 7517 | 1.16141168 | Prob > F =      | 0.0000 |
|          |            |      |            | R-squared =     | 0.0458 |
|          |            |      |            | Adj R-squared = | 0.0432 |
| Total    | 9149.5904  | 7538 | 1.21379549 | Root MSE =      | 1.0777 |

| lfsato     | Coef.     | Std. Err. | t      | P> t  | [95% Conf. Interval] |
|------------|-----------|-----------|--------|-------|----------------------|
| Unemployed | -.5810668 | .0558431  | -10.41 | 0.000 | -.690535 - .4715987  |
| Female     | .0081627  | .0249518  | 0.33   | 0.744 | -.0407499 .0570753   |
| age        | -.0651185 | .0060173  | -10.82 | 0.000 | -.076914 - .0533229  |
| age2       | .0007597  | .0000709  | 10.71  | 0.000 | .0006207 .0008987    |
| Married    | .3631935  | .0303262  | 11.98  | 0.000 | .3037458 .4226413    |
| Q1         | .0227467  | .0453889  | 0.50   | 0.616 | -.0662283 .1117217   |
| Q2         | .0505857  | .0572905  | 0.88   | 0.377 | -.0617197 .1628912   |
| Q3         | -.0638055 | .0441259  | -1.45  | 0.148 | -.1503046 .0226936   |
| Q4         | -.0413002 | .0426692  | -0.97  | 0.333 | -.1249438 .0423433   |
| Q5         | .0552687  | .0620582  | 0.89   | 0.373 | -.0663827 .1769201   |
| R1         | -.0043919 | .096706   | -0.05  | 0.964 | -.1939628 .185179    |
| R2         | .0397403  | .0740046  | 0.54   | 0.591 | -.1053293 .18481     |
| R3         | .0425633  | .0774255  | 0.55   | 0.583 | -.1092124 .194339    |
| R4         | -.0352317 | .0788457  | -0.45  | 0.655 | -.1897914 .119328    |
| R5         | -.0799175 | .0799338  | -1.00  | 0.317 | -.2366101 .0767751   |
| R6         | .0054773  | .0773569  | 0.07   | 0.944 | -.1461639 .1571186   |
| R8         | -.1016436 | .0715905  | -1.42  | 0.156 | -.2419811 .0386938   |
| R9         | .0202057  | .0770375  | 0.26   | 0.793 | -.1308092 .1712207   |
| R10        | .0247946  | .0663524  | 0.37   | 0.709 | -.1052747 .1548639   |
| R11        | .0016312  | .0658346  | 0.02   | 0.980 | -.127423 .1306853    |
| R12        | .1548269  | .0692573  | 2.24   | 0.025 | .0190631 .2905906    |
| _cons      | 6.26321   | .1328302  | 47.15  | 0.000 | 6.002825 6.523594    |

```
. * 8.5.2. Unordered Outcomes
```

```
. *-----
```

```
. recode jbstat (1 2 = 1) (3 = 2) (4/10 = 3), gen(LMS)
(13412 differences between jbstat and LMS)
```

```
. label var LMS "Labour Market Status"
```

```
. label define LMS 1 "Has Job" 2 "Unemployed" 3 "Inactive"
```

```
. label values LMS LMS
```

```
. mprobit LMS i.Female age age2 i.Married i.Q1-Q5 i.R1-R6 i.R8-R12, baseoutcome(1)
```

```
Iteration 0: log likelihood = -7081.9916
Iteration 1: log likelihood = -7053.7331
Iteration 2: log likelihood = -7049.0935
Iteration 3: log likelihood = -7049.0699
Iteration 4: log likelihood = -7049.0699
```

|                               |                 |         |
|-------------------------------|-----------------|---------|
| Multinomial probit regression | Number of obs = | 13168   |
|                               | Wald chi2(40) = | 3712.82 |
| Log likelihood = -7049.0699   | Prob > chi2 =   | 0.0000  |

| LMS     | Coef.          | Std. Err. | z | P> z | [95% Conf. Interval] |
|---------|----------------|-----------|---|------|----------------------|
| Has_Job | (base outcome) |           |   |      |                      |









| LnW      | Coef.     | Std. Err. | t      | P> t  | [95% Conf. Interval] |           |
|----------|-----------|-----------|--------|-------|----------------------|-----------|
| age      | .046388   | .0073095  | 6.35   | 0.000 | .0320557             | .0607202  |
| age2     | -.0005002 | .0000907  | -5.52  | 0.000 | -.000678             | -.0003225 |
| Married  | .0192148  | .0196193  | 0.98   | 0.327 | -.0192541            | .0576837  |
| PartTime | -.8878366 | .0211297  | -42.02 | 0.000 | -.9292671            | -.8464062 |
| Q1       | .7766111  | .0350035  | 22.19  | 0.000 | .7079773             | .8452449  |
| Q2       | .4979393  | .0455754  | 10.93  | 0.000 | .4085763             | .5873023  |
| Q3       | .4191105  | .0362539  | 11.56  | 0.000 | .348025              | .490196   |
| Q4       | .2296972  | .0345773  | 6.64   | 0.000 | .1618991             | .2974953  |
| Q5       | .1030482  | .0469546  | 2.19   | 0.028 | .010981              | .1951154  |
| R1       | -.2620804 | .0630697  | -4.16  | 0.000 | -.3857457            | -.1384151 |
| R2       | -.2914039 | .0588672  | -4.95  | 0.000 | -.4068289            | -.1759788 |
| R3       | -.2600921 | .059621   | -4.36  | 0.000 | -.3769952            | -.1431889 |
| R4       | -.3089352 | .0612434  | -5.04  | 0.000 | -.4290194            | -.1888509 |
| R5       | -.3379509 | .0630519  | -5.36  | 0.000 | -.4615813            | -.2143205 |
| R6       | -.2849778 | .0617957  | -4.61  | 0.000 | -.406145             | -.1638106 |
| R8       | -.217186  | .0576624  | -3.77  | 0.000 | -.3302488            | -.1041233 |
| R9       | -.2992388 | .05913    | -5.06  | 0.000 | -.4151792            | -.1832985 |
| R10      | -.3480776 | .0524864  | -6.63  | 0.000 | -.4509914            | -.2451637 |
| R11      | -.2463581 | .0513369  | -4.80  | 0.000 | -.347018             | -.1456981 |
| R12      | -.3125936 | .0533044  | -5.86  | 0.000 | -.4171114            | -.2080758 |
| _cons    | 6.268379  | .1489524  | 42.08  | 0.000 | 5.976317             | 6.56044   |

```
.
. heckman LnW age age2 Married PartTime Q1-Q5 R1-R6 R8-R12 ///
> if Female == 1 & age >= 23 & age < 60, ///
> select(Works = age age2 Married Q1-Q5 R1-R6 R8-R12 nchild) ///
> first mills(MR) vce(robust)
```

```
Iteration 0: log likelihood = -2383.8457
Iteration 1: log likelihood = -2111.997
Iteration 2: log likelihood = -2110.4567
Iteration 3: log likelihood = -2110.4567
```

```
Probit regression                                Number of obs   =      4070
                                                LR chi2(20)    =      546.78
                                                Prob > chi2     =      0.0000
Log likelihood = -2110.4567                    Pseudo R2      =      0.1147
```

| Works   | Coef.     | Std. Err. | z      | P> z  | [95% Conf. Interval] |           |
|---------|-----------|-----------|--------|-------|----------------------|-----------|
| age     | .1340117  | .0193797  | 6.92   | 0.000 | .0960282             | .1719952  |
| age2    | -.0018167 | .0002366  | -7.68  | 0.000 | -.0022804            | -.001353  |
| Married | .2602291  | .0516983  | 5.03   | 0.000 | .1589022             | .361556   |
| Q1      | 1.077933  | .0769023  | 14.02  | 0.000 | .9272069             | 1.228658  |
| Q2      | .7523163  | .0976412  | 7.70   | 0.000 | .5609432             | .9436895  |
| Q3      | .7591271  | .0728852  | 10.42  | 0.000 | .6162747             | .9019795  |
| Q4      | .7123348  | .066091   | 10.78  | 0.000 | .5827988             | .8418707  |
| Q5      | .3778668  | .0971732  | 3.89   | 0.000 | .1874109             | .5683228  |
| R1      | .0190715  | .1764556  | 0.11   | 0.914 | -.326775             | .3649181  |
| R2      | -.0081888 | .1390256  | -0.06  | 0.953 | -.2806739            | .2642962  |
| R3      | .0538256  | .1467358  | 0.37   | 0.714 | -.2337713            | .3414225  |
| R4      | -.0809601 | .1449699  | -0.56  | 0.577 | -.3650958            | .2031756  |
| R5      | .1043767  | .1545791  | 0.68   | 0.500 | -.1985927            | .4073461  |
| R6      | -.0290801 | .1452352  | -0.20  | 0.841 | -.3137359            | .2555758  |
| R8      | .2025496  | .1387449  | 1.46   | 0.144 | -.0693854            | .4744846  |
| R9      | .110228   | .149      | 0.74   | 0.459 | -.1818065            | .4022626  |
| R10     | -.0574524 | .1248853  | -0.46  | 0.645 | -.3022231            | .1873183  |
| R11     | .0583668  | .1254117  | 0.47   | 0.642 | -.1874357            | .3041693  |
| R12     | -.1199183 | .1248881  | -0.96  | 0.337 | -.3646944            | .1248578  |
| nchild  | -.3066468 | .0244229  | -12.56 | 0.000 | -.3545147            | -.2587788 |
| _cons   | -2.188768 | .3886447  | -5.63  | 0.000 | -2.950497            | -1.427038 |

```
Iteration 0: log pseudolikelihood = -4141.6855
Iteration 1: log pseudolikelihood = -4141.0161
Iteration 2: log pseudolikelihood = -4141.001
Iteration 3: log pseudolikelihood = -4141.0009
```

```
Heckman selection model                        Number of obs   =      4070
```

```

(regression model with sample selection)      Censored obs      =      1109
                                              Uncensored obs    =      2961

                                              Wald chi2(20)      =      1964.13
                                              Prob > chi2        =      0.0000

Log pseudolikelihood = -4141.001

```

|          |           | Robust    |        |       |                      |           |
|----------|-----------|-----------|--------|-------|----------------------|-----------|
|          | Coef.     | Std. Err. | z      | P> z  | [95% Conf. Interval] |           |
| LnW      |           |           |        |       |                      |           |
| age      | .0403529  | .0086761  | 4.65   | 0.000 | .0233481             | .0573577  |
| age2     | -.0004184 | .0001098  | -3.81  | 0.000 | -.0006336            | -.0002032 |
| Married  | .0024247  | .0226891  | 0.11   | 0.915 | -.042045             | .0468945  |
| PartTime | -.8655154 | .0261085  | -33.15 | 0.000 | -.9166872            | -.8143436 |
| Q1       | .6578638  | .0775116  | 8.49   | 0.000 | .5059439             | .8097836  |
| Q2       | .4070711  | .0708434  | 5.75   | 0.000 | .2682205             | .5459217  |
| Q3       | .3259123  | .0665929  | 4.89   | 0.000 | .1953927             | .4564319  |
| Q4       | .1424577  | .0645076  | 2.21   | 0.027 | .0160252             | .2688903  |
| Q5       | .0500665  | .0579052  | 0.86   | 0.387 | -.0634256            | .1635587  |
| R1       | -.2640085 | .064835   | -4.07  | 0.000 | -.3910828            | -.1369342 |
| R2       | -.2902065 | .0599824  | -4.84  | 0.000 | -.4077699            | -.1726431 |
| R3       | -.267454  | .0608267  | -4.40  | 0.000 | -.3866721            | -.1482359 |
| R4       | -.2974514 | .0627542  | -4.74  | 0.000 | -.4204474            | -.1744555 |
| R5       | -.3463974 | .064679   | -5.36  | 0.000 | -.473166             | -.2196288 |
| R6       | -.2837482 | .0628418  | -4.52  | 0.000 | -.406916             | -.1605805 |
| R8       | -.236092  | .0597249  | -3.95  | 0.000 | -.3531508            | -.1190333 |
| R9       | -.3094822 | .0606722  | -5.10  | 0.000 | -.4283976            | -.1905668 |
| R10      | -.3404277 | .0536754  | -6.34  | 0.000 | -.4456296            | -.2352258 |
| R11      | -.2519995 | .0524406  | -4.81  | 0.000 | -.3547811            | -.1492179 |
| R12      | -.2943966 | .0547654  | -5.38  | 0.000 | -.4017349            | -.1870583 |
| _cons    | 6.551172  | .2358671  | 27.77  | 0.000 | 6.088881             | 7.013463  |
| Works    |           |           |        |       |                      |           |
| age      | .1331478  | .0193818  | 6.87   | 0.000 | .0951602             | .1711355  |
| age2     | -.0017987 | .00024    | -7.50  | 0.000 | -.002269             | -.0013283 |
| Married  | .2626056  | .0504373  | 5.21   | 0.000 | .1637503             | .3614609  |
| Q1       | 1.057794  | .0814626  | 12.99  | 0.000 | .8981305             | 1.217458  |
| Q2       | .7456624  | .0967417  | 7.71   | 0.000 | .5560521             | .9352727  |
| Q3       | .7535347  | .0738803  | 10.20  | 0.000 | .608732              | .8983375  |
| Q4       | .7120935  | .0667925  | 10.66  | 0.000 | .5811826             | .8430043  |
| Q5       | .3771014  | .0979621  | 3.85   | 0.000 | .1850992             | .5691036  |
| R1       | .0031586  | .1745308  | 0.02   | 0.986 | -.3389155            | .3452326  |
| R2       | -.0098349 | .1418904  | -0.07  | 0.945 | -.2879349            | .2682651  |
| R3       | .0506498  | .1472185  | 0.34   | 0.731 | -.2378932            | .3391928  |
| R4       | -.0931455 | .1483827  | -0.63  | 0.530 | -.3839703            | .1976793  |
| R5       | .0815787  | .1554687  | 0.52   | 0.600 | -.2231344            | .3862918  |
| R6       | -.0388129 | .1461277  | -0.27  | 0.791 | -.325218             | .2475922  |
| R8       | .2012568  | .1429861  | 1.41   | 0.159 | -.0789907            | .4815043  |
| R9       | .1001348  | .1551209  | 0.65   | 0.519 | -.2038965            | .4041661  |
| R10      | -.0642644 | .1285866  | -0.50  | 0.617 | -.3162894            | .1877606  |
| R11      | .044923   | .1307084  | 0.34   | 0.731 | -.2112608            | .3011068  |
| R12      | -.1190685 | .127693   | -0.93  | 0.351 | -.3693422            | .1312051  |
| nchild   | -.301542  | .0315292  | -9.56  | 0.000 | -.363338             | -.239746  |
| _cons    | -2.182475 | .3803974  | -5.74  | 0.000 | -2.928041            | -1.43691  |
| /athrho  | -.4847439 | .2963721  | -1.64  | 0.102 | -1.065623            | .0961349  |
| /lnsigma | -.6879872 | .0559823  | -12.29 | 0.000 | -.7977106            | -.5782639 |
| rho      | -.4500348 | .2363475  |        |       | -.7878063            | .0958398  |
| sigma    | .5025866  | .028136   |        |       | .4503589             | .5608713  |
| lambda   | -.2261815 | .1308381  |        |       | -.4826193            | .0302564  |

Wald test of indep. eqns. (rho = 0): chi2(1) = 2.68 Prob > chi2 = 0.1019

```

. log close
  name: <unnamed>
  log: C:\My Documents\Example_Chapter8.log
  log type: text
  closed on: 1 Sep 2014, 15:28:22

```
