# Supplementary material
Source: publisher site journal article supplement (https://uk.sagepub.com/sites/default/files/upm-binaries/74511_AppendixC_LogFiles.zip)
Supplement: Supplementary file 2 [file 74511_AppendixC_LogFiles.zip]

```
*****
* A Practical Guide to Using Panel Data
* Simonetta Longhi and Alita Nandi
* ISER, University of Essex
* Chapter 14
*****
```

```
-----
name: <unnamed>
log: C:\My Documents\chapter14\Example_Chapter14.log
log type: text
opened on: 1 Sep 2014, 15:37:28
```

```
.
. use DatasetR.dta, clear

.
. * 14.2. Tables of Descriptive Statistics
. *-----
.
. * 14.2.1. Using the Collapse Command
. *-----
.
. use DatasetR.dta, clear

.
. recode region2 (1/9 = 1) (10 = 2) (11 = 3) (12 = 4), gen(Country)
(13974 differences between region2 and Country)

. label var Country "Country of residence"

. label define Country 1 "England" 2 "Wales" 3 "Scotland" 4 "Northern Ireland"

. label value Country Country

.
. * Totals by row (country)
.
. bysort Country: egen X_NotMarried = total(Married==0)

. bysort Country: egen X_Married = total(Married==1)

. egen N_NotMarried = total(Married==0) if Country < .
(84 missing values generated)

. egen N_Married = total(Married==1) if Country < .
(84 missing values generated)

.
.
. keep Country X_* N_*

. bysort Country: keep if _n==1
(14414 observations deleted)

.
. generate T_NotMarried = X_NotMarried / N_NotMarried
(1 missing value generated)

. generate T_Married = X_Married / N_Married
(1 missing value generated)

.
. label var T_NotMarried ///
> "Proportion of not married or cohabiting people living in country"

. label var T_Married ///
> "Proportion of people married or cohabiting people living in country"

.
. drop if Country == .
(1 observation deleted)
```

```
.
. list
```

|    | Country          | X_NotM~d | X_Marr~d | N_NotM~d | N_Marr~d | T_NotM~d | T_Marr~d |
|----|------------------|----------|----------|----------|----------|----------|----------|
| 1. | England          | 2330     | 4757     | 5128     | 9167     | .4543682 | .5189266 |
| 2. | Wales            | 944      | 1603     | 5128     | 9167     | .1840874 | .1748664 |
| 3. | Scotland         | 925      | 1533     | 5128     | 9167     | .1803822 | .1672303 |
| 4. | Northern Ireland | 929      | 1274     | 5128     | 9167     | .1811623 | .1389768 |

```
.
. * add one more line of observation and populate it
. set obs 6
obs was 4, now 6

.
. replace T_Married = N_Married[1] if _n==6
(1 real change made)

. replace T_NotMarried = N_NotMarried[1] if _n==6
(1 real change made)

. replace Country = 6 if _n==6
(1 real change made)

.
. replace T_Married = 1 if _n==5
(1 real change made)

. replace T_NotMarried = 1 if _n==5
(1 real change made)

. replace Country = 5 if _n==5
(1 real change made)

.
. label define Country 5 "Total %" 6 "Observations", modify

.
. generate CountryString = "England" if Country == 1
(5 missing values generated)

. replace CountryString = "Wales" if Country == 2
(1 real change made)

. replace CountryString = "Scotland" if Country == 3
CountryString was str7 now str8
(1 real change made)

. replace CountryString = "Northern Ireland" if Country == 4
CountryString was str8 now str16
(1 real change made)

. replace CountryString = "Total" if Country == 6
(1 real change made)

.
. keep Country CountryString T_NotMarried T_Married

. order Country CountryString T_NotMarried T_Married

. save "$analysisdir\DescriptiveTableMethod1.dta", replace
file C:\My Documents\chapter14\DescriptiveTableMethod1.dta saved

.
. export excel using "$analysisdir\DescriptiveTableMethod1.xls", ///
> replace firstrow(variable)
file C:\My Documents\chapter14\DescriptiveTableMethod1.xls saved

.
.
```

```

. * 14.2.2. Using the Saved Results
. *-----
.
. use DatasetR.dta, clear

.
. recode region2 (1/9 = 1) (10 = 2) (11 = 3) (12 = 4), gen(Country)
(13974 differences between region2 and Country)

. label var Country "Country of residence"

. label define Country 1 "England" 2 "Wales" 3 "Scotland" 4 "Northern Ireland"

. label value Country Country

.
. generate Names = ""
(14419 missing values generated)

. replace Names = "England" in 1
Names was str1 now str7
(1 real change made)

. replace Names = "Wales" in 2
(1 real change made)

. replace Names = "Scotland" in 3
Names was str7 now str8
(1 real change made)

. replace Names = "Northern Ireland" in 4
Names was str8 now str16
(1 real change made)

. replace Names = "Total %" in 5
(1 real change made)

. replace Names = "Observations" in 6
(1 real change made)

.
. generate T_NotMarried = .
(14419 missing values generated)

. generate T_Married = .
(14419 missing values generated)

.
. tabulate Country Married, col matcell(Total)

```

```

+-----+
| Key |
+-----+
| frequency |
| column percentage |
+-----+

```

| Country of residence | Whether married or cohabiting |                | Total          |
|----------------------|-------------------------------|----------------|----------------|
|                      | 0                             | 1              |                |
| England              | 2,330<br>45.44                | 4,757<br>51.89 | 7,087<br>49.58 |
| Wales                | 944<br>18.41                  | 1,603<br>17.49 | 2,547<br>17.82 |
| Scotland             | 925<br>18.04                  | 1,533<br>16.72 | 2,458<br>17.19 |
| Northern Ireland     | 929<br>18.12                  | 1,274<br>13.90 | 2,203<br>15.41 |

|       |        |        |        |
|-------|--------|--------|--------|
| Total | 5,128  | 9,167  | 14,295 |
|       | 100.00 | 100.00 | 100.00 |

```
. matrix list Total
```

```
Total[4,2]
```

|    |      |      |
|----|------|------|
|    | c1   | c2   |
| r1 | 2330 | 4757 |
| r2 | 944  | 1603 |
| r3 | 925  | 1533 |
| r4 | 929  | 1274 |

```
.
. local i = 1
```

```
. while `i' <= 4 {
2.     replace T_NotMarried = Total[`i',1] in `i'
3.     replace T_Married = Total[`i',2] in `i'
4.     local i = `i' + 1
5. }
```

```
(1 real change made)
```

```
. * browse Names T_*
```

```
. * Proportions by row
```

```
. *-----
. *generate Percentage = .
. *generate Total = T_NotMarried + T_Married
. *foreach var of varlist T_NotMarried T_Married {
. *     replace `var' = `var' / Total in 1/4
. * }
. *replace Percentage = T_NotMarried + T_Married
. * browse Names T_* Total Percentage
```

```
. * Proportions by column
```

```
. *-----
. tab Country if Married == 0
```

| Country of residence | Freq. | Percent | Cum.   |
|----------------------|-------|---------|--------|
| England              | 2,330 | 45.44   | 45.44  |
| Wales                | 944   | 18.41   | 63.85  |
| Scotland             | 925   | 18.04   | 81.88  |
| Northern Ireland     | 929   | 18.12   | 100.00 |
| Total                | 5,128 | 100.00  |        |

```
. replace T_NotMarried = r(N) in 5/6
(2 real changes made)
```

```
. generate Tempo = r(N) in 1/5
(14414 missing values generated)
```

```
. replace T_NotMarried = T_NotMarried / Tempo in 1/5
(5 real changes made)
```

```
. drop Tempo
```

```
. tab Country if Married == 1
```

| Country of residence | Freq. | Percent | Cum.  |
|----------------------|-------|---------|-------|
| England              | 4,757 | 51.89   | 51.89 |

|                  |       |        |        |
|------------------|-------|--------|--------|
| Wales            | 1,603 | 17.49  | 69.38  |
| Scotland         | 1,533 | 16.72  | 86.10  |
| Northern Ireland | 1,274 | 13.90  | 100.00 |
| -----            |       |        |        |
| Total            | 9,167 | 100.00 |        |

```
. replace T_Married = r(N) in 5/6
(2 real changes made)

. generate Tempo = r(N) in 1/5
(14414 missing values generated)

. replace T_Married = T_Married / Tempo in 1/5
(5 real changes made)

. drop Tempo

. * browse Names T_*
.
. * Save into table *
. * If we computed proportions by row:
. * keep Names T_* Percentage Total
. * If we computed proportions by column:
. keep Names T_*

. keep in 1/6
(14413 observations deleted)

. rename Names Country

. order Country T_NotMarried T_Married

. export excel using "$analysisdir\DescriptiveTableMethod2", ///
> firstrow(varlabels) replace
file C:\My Documents\chapter14\DescriptiveTableMethod2.xls saved

.
.
.
. * 14.2.3. Using the collapse command
. *-----
. use DatasetR.dta, clear

.
. recode region2 (1/9 = 1) (10 = 2) (11 = 3) (12 = 4), gen(Country)
(13974 differences between region2 and Country)

.
. keep if Country<.
(84 observations deleted)

. save temp, replace
(note: file temp.dta not found)
file temp.dta saved

.
. tabstat Married, by(Country) s(mean n)

Summary for variables: Married
by categories of: Country (RECODE of region2 (government office region))

Country |          mean          N
-----+-----
      1 |      .671229      7087
      2 |      .6293679     2547
      3 |      .6236778     2458
      4 |      .5783023     2203
-----+-----
    Total |      .6412732     14295
-----

.
. use temp, clear
```

```

. collapse (mean) ProportionMarried=Married ///
>         (count) Number_Observations = Married, by(Country)

. list

+-----+
| Country   | ProportionMarried | Number_Observations |
+-----+
1. | 1         | .671229            | 7087                 |
2. | 2         | .6293679           | 2547                 |
3. | 3         | .6236778           | 2458                 |
4. | 4         | .5783023           | 2203                 |
+-----+

. save temp1, replace
(note: file temp1.dta not found)
file temp1.dta saved

.
. use temp, clear

. collapse (mean) ProportionMarried=Married ///
>         (count) Number_Observations = Married

. generate Country = 5

. append using temp1

.
. label var Country "Country of residence"

. label define Country 5 "UK" 1 "England" 2 "Wales" 3 "Scotland" ///
>         4 "Northern Ireland"

. label value Country Country

.
. list

+-----+
| ProportionMarried | Number_Observations | Country |
+-----+
1. | .6412732          | 14295                | UK      |
2. | .671229           | 7087                 | England |
3. | .6293679          | 2547                 | Wales   |
4. | .6236778          | 2458                 | Scotland |
5. | .5783023          | 2203                 | Northern Ireland |
+-----+

.
. sort Country

. order Country ProportionMarried Number_Observations

. export excel using "$analysisdir\DescriptiveTableMethod3.xls", ///
>         replace firstrow(variable)
file C:\My Documents\chapter14\DescriptiveTableMethod3.xls saved

.
. erase temp.dta

. erase temp1.dta

.
.
. * 14.3 Graphs of Descriptive Statistics
. *-----
.
. * 14.3.1 Bar Graphs
. *-----
.
. graph bar ProportionMarried, ///

```

```

> over(Country, label(angle(45))) ytitle("Proportion") ///
> scheme(slmanual) title("Proportion married - UK countries") ///
> note("Source: BHPS wave 18") ///
> saving("$analysisdir\PropMarried1.gph", replace)
(file C:\My Documents\chapter14\PropMarried1.gph saved)

.
. graph export "$analysisdir\PropMarried1.pdf", replace
(file C:\My Documents\chapter14\PropMarried1.pdf written in PDF format)

```

```

.
.
. use DatasetR.dta, clear

. recode region2 (1/9 = 1) (10 = 2) (11 = 3) (12 = 4), gen(Country)
(13974 differences between region2 and Country)

. keep if Country<.
(84 observations deleted)

. keep if Female<.
(733 observations deleted)

.
. collapse (mean) ProportionMarried=Married, by(Country Female)

. label define Country 5 "UK" 1 "England" 2 "Wales" 3 "Scotland" ///
> 4 "Northern Ireland"

. label value Country Country

. label define Female 0 "Men" 1 "Women"

. lab value Female Female

. list

```

|    | Female | Country          | Proportion |
|----|--------|------------------|------------|
| 1. | Men    | England          | .7023121   |
| 2. | Women  | England          | .6499442   |
| 3. | Men    | Wales            | .6792453   |
| 4. | Women  | Wales            | .5913571   |
| 5. | Men    | Scotland         | .6640927   |
| 6. | Women  | Scotland         | .5987159   |
| 7. | Men    | Northern Ireland | .6278118   |
| 8. | Women  | Northern Ireland | .5387755   |

```

.
. graph bar ProportionMarried, ///
> over(Country, label(angle(45))) over(Female) ///
> ytitle("Proportion") scheme(slmanual) ///
> title("Proportion married across UK countries") ///
> note("Source: BHPS wave 18") ///
> saving("$analysisdir\PropMarried2.gph", replace)
(file C:\My Documents\chapter14\PropMarried2.gph saved)

```

```

.
.
. use DatasetR.dta, clear

. recode region2 (1/9 = 1) (10 = 2) (11 = 3) (12 = 4), gen(Country)
(13974 differences between region2 and Country)

. keep if Country<.
(84 observations deleted)

.
. collapse (mean) Q1 Q2 Q3 Q4 Q5 Q6, by(Country)

```

```

. label define Country 5 "UK" 1 "England" 2 "Wales" 3 "Scotland" ///
> 4 "Northern Ireland"

. label value Country Country

.
. graph hbar Q1 Q2 Q3 Q4 Q5 Q6, stack ///
> over(Country, label(angle(45))) ///
> ytitle("Proportion") ///
> title("Composition across UK countries") ///
> note("Source: BHPS wave 18") ///
> scheme(s1manual) ///
> legend(label(1 "1st or higher") ///
> label(2 "HND,HNC,teaching") ///
> label(3 "A level") ///
> label(4 "O Level") ///
> label(5 "CSE") ///
> label(6 "None")) ///
> saving("$analysisdir\PropEdu1.gph", replace)
(file C:\My Documents\chapter14\PropEdu1.gph saved)

.
.
. use DatasetR.dta, clear

. recode region2 (1/9 = 1) (10 = 2) (11 = 3) (12 = 4), gen(Country)
(13974 differences between region2 and Country)

. keep if Country<.
(84 observations deleted)

.
. graph hbar Q1 Q2 Q3 Q4 Q5 Q6, stack ///
> over(Country, relabel(1 "England" 2 "Wales" 3 "Scotland" ///
> 4 "Northern Ireland") label(angle(45))) ///
> ytitle("Proportion") ///
> title("Composition across UK countries") ///
> scheme(s1manual) ///
> note("Source: BHPS wave 18") ///
> legend(label(1 "1st or higher") ///
> label(2 "HND,HNC,teaching") ///
> label(3 "A level") ///
> label(4 "O Level") ///
> label(5 "CSE") ///
> label(6 "None")) ///
> saving("$analysisdir\PropEdu2.gph", replace)
(file C:\My Documents\chapter14\PropEdu2.gph saved)

.
.
. label define Female 0 "Men" 1 "Women"

. lab value Female Female

.
. graph hbar Q1 Q2 Q3 Q4 Q5 Q6, stack ///
> over(Country, ///
> relabel(1 "England" 2 "Wales" 3 "Scotland" 4 "Northern Ireland") ///
> label(angle(45))) ///
> by(Female) ytitle("Proportion") ///
> scheme(s1manual) ///
> note("Source: BHPS wave 18") ///
> legend(label(1 "1st or higher") ///
> label(2 "HND,HNC,teaching") ///
> label(3 "A level") ///
> label(4 "O Level") ///
> label(5 "CSE") ///
> label(6 "None")) ///
> saving("$analysisdir\PropEdu3.gph", replace)
(file C:\My Documents\chapter14\PropEdu3.gph saved)

.
.

```



```

. * 14.3.2 Time Series Graphs
. *-----
.
. use DataFile.dta, clear

.
. recode region (1/16 = 1) (17 = 2) (18 = 3) (19 = 4), gen(Country)
(232312 differences between region and Country)

. * Note that this is region, not region2 as in the previous data file
. label var Country "Country of residence"

. label define Country 1 "England" 2 "Wales" 3 "Scotland" 4 "Northern Ireland"

.
. recode mastat (1 2 7 = 1) (3/6 8/10 = 0), gen(Married)
(110579 differences between mastat and Married)

.
. * Totals and proportions by row (i.e. country)
. bysort Country wave: egen T_NotMarried = total(Married==0)

. bysort Country wave: egen T_Married = total(Married==1)

.
. * Collapse
. collapse T_*, by(Country wave)

.
. generate PropNotMarried = T_NotMarried / (T_NotMarried + T_Married)

. generate PropMarried = T_Married / (T_NotMarried + T_Married)

.
. label var PropNotMarried "Proportion of people not married or cohabiting"

. label var PropMarried "Proportion of people married or cohabiting"

.
. keep wave Country PropNotMarried PropMarried

. drop if Country == .
(13 observations deleted)

.
. label value Country Country

. * We have already defined the label above,
. * here we only need to attach it to this new variable
.
. generate year = wave + 1990

.
. tsset Country year, yearly
      panel variable:  Country (unbalanced)
      time variable:  year, 1991 to 2008
                delta:  1 year

.
. twoway (tsline PropMarried, lcolor(black)) ///
>       (tsline PropNotMarried, lpattern(dash))      ///
>       if Country == 1,                               ///
>       ytitle(Proportion) ytitle(, size(medsmall))  ///
>       tttitle(Year) tttitle(, size(medsmall))      ///
>       scheme(smanual) ///
>       legend(cols(1) nobox region(lpattern(blank)))
>

. graph save Graph "$analysisdir\Graph1.gph", replace
(file C:\My Documents\chapter14\Graph1.gph saved)

.
.

```

```

. * 14.4. Saving Regression Results
. *-----
.
. * 14.4.1. Saving Results of a Linear Regression
. *-----
.
. use DatasetR.dta, clear

.
. regress LnW age age2 Female Married Q1-Q5, vce(robust)

```

```

Linear regression                                Number of obs =      6985
                                                F(   9,   6975) =   429.22
                                                Prob > F       =   0.0000
                                                R-squared      =   0.3777
                                                Root MSE      =   .63928

```

| LnW     | Coef.     | Robust<br>Std. Err. | t      | P> t  | [95% Conf. Interval] |           |
|---------|-----------|---------------------|--------|-------|----------------------|-----------|
| age     | .1270167  | .0042615            | 29.81  | 0.000 | .1186627             | .1353706  |
| age2    | -.0014477 | .0000521            | -27.76 | 0.000 | -.00155              | -.0013455 |
| Female  | -.5163072 | .0152177            | -33.93 | 0.000 | -.5461385            | -.4864758 |
| Married | .0832343  | .0178122            | 4.67   | 0.000 | .0483169             | .1181517  |
| Q1      | .7241378  | .0294961            | 24.55  | 0.000 | .6663164             | .7819593  |
| Q2      | .5051909  | .036249             | 13.94  | 0.000 | .4341319             | .5762499  |
| Q3      | .2988562  | .0289995            | 10.31  | 0.000 | .2420083             | .3557042  |
| Q4      | .1945445  | .0288056            | 6.75   | 0.000 | .1380767             | .2510123  |
| Q5      | .1258957  | .0374377            | 3.36   | 0.001 | .0525064             | .1992851  |
| _cons   | 4.573313  | .0816424            | 56.02  | 0.000 | 4.413269             | 4.733357  |

```

. estimates store R_OLS1

```

```

. regress LnW age age2 Female Married Q1-Q5 R1-R6 R8-R12, vce(robust)

```

```

Linear regression                                Number of obs =      6933
                                                F(  20,   6912) =   199.52
                                                Prob > F       =   0.0000
                                                R-squared      =   0.3867
                                                Root MSE      =   .63613

```

| LnW     | Coef.     | Robust<br>Std. Err. | t      | P> t  | [95% Conf. Interval] |           |
|---------|-----------|---------------------|--------|-------|----------------------|-----------|
| age     | .1277878  | .0042482            | 30.08  | 0.000 | .1194601             | .1361156  |
| age2    | -.0014583 | .0000519            | -28.11 | 0.000 | -.00156              | -.0013566 |
| Female  | -.5173127 | .0151984            | -34.04 | 0.000 | -.5471062            | -.4875193 |
| Married | .0835274  | .0177792            | 4.70   | 0.000 | .0486747             | .1183801  |
| Q1      | .7055081  | .0295252            | 23.90  | 0.000 | .6476296             | .7633866  |
| Q2      | .5010076  | .0362811            | 13.81  | 0.000 | .4298855             | .5721297  |
| Q3      | .2901391  | .0289532            | 10.02  | 0.000 | .2333821             | .3468962  |
| Q4      | .1872705  | .0287069            | 6.52   | 0.000 | .1309963             | .2435448  |
| Q5      | .1165528  | .0373302            | 3.12   | 0.002 | .0433741             | .1897315  |
| R1      | -.2786627 | .0536325            | -5.20  | 0.000 | -.3837988            | -.1735266 |
| R2      | -.3066754 | .0464689            | -6.60  | 0.000 | -.3977687            | -.2155822 |
| R3      | -.2909338 | .0466247            | -6.24  | 0.000 | -.3823325            | -.1995351 |
| R4      | -.3418577 | .0483738            | -7.07  | 0.000 | -.4366852            | -.2470301 |
| R5      | -.3572488 | .0509676            | -7.01  | 0.000 | -.457161             | -.2573366 |
| R6      | -.258527  | .0514016            | -5.03  | 0.000 | -.35929              | -.157764  |
| R8      | -.2885082 | .0464486            | -6.21  | 0.000 | -.3795616            | -.1974547 |
| R9      | -.3170754 | .0474077            | -6.69  | 0.000 | -.4100092            | -.2241417 |
| R10     | -.3830289 | .0417081            | -9.18  | 0.000 | -.4647895            | -.3012682 |
| R11     | -.3182777 | .040951             | -7.77  | 0.000 | -.3985543            | -.2380012 |
| R12     | -.3309315 | .041912             | -7.90  | 0.000 | -.4130919            | -.2487711 |
| _cons   | 4.878964  | .089349             | 54.61  | 0.000 | 4.703812             | 5.054115  |

```

. estimates store R_OLS2

```

```

.
. estout R_OLS*
> ///
> using "$analysisdir\Wages.out", ///
> keep (age age2 Female Married Q1 Q2 Q3 Q4 Q5) ///
> cells(b(star fmt(%9.3f)) se(par fmt(%9.3f))) ///
> style(tab) stats(r2 N, fmt(%9.3f %9.0g) ///
> labels(R2 Observations)) label collabels(, none) ///
> starlevels(+ 0.05 * 0.01) ///
> postfoot("Robust std.err. in parenthesis + Sign. at 5% * Sign. at 1%") ///
> replace
(output written to C:\My Documents\chapter14\Wages.out)

.
. * 14.4.2. Saving Marginal Effects
. *-----
.
. recode jbstat (1 2 = 1) (3/10 = 0), gen(Employed)
(13412 differences between jbstat and Employed)

. label define Employed 1 "Employed/Self-Employed" 0 "Unemployed or Inactive"

. label value Employed Employed

.
. generate Variable = ""
(14419 missing values generated)

. replace Variable = "age" in 1
Variable was str1 now str3
(1 real change made)

. replace Variable = "age2" in 3
Variable was str3 now str4
(1 real change made)

. replace Variable = "Married" in 5
Variable was str4 now str7
(1 real change made)

. replace Variable = "Q1" in 7
(1 real change made)

. replace Variable = "Q2" in 9
(1 real change made)

. replace Variable = "Q3" in 11
(1 real change made)

. replace Variable = "Q4" in 13
(1 real change made)

. replace Variable = "Q5" in 15
(1 real change made)

. replace Variable = "Log likelihood" in 18
Variable was str7 now str14
(1 real change made)

. replace Variable = "Observations" in 19
(1 real change made)

. * We leave cells empty for the standard errors
.
. * Men
. probit Employed age age2 Married Q1-Q5 R1-R6 R8-R12 if Female == 0

Iteration 0: log likelihood = -3903.5171
Iteration 1: log likelihood = -2374.8328
Iteration 2: log likelihood = -2338.7052
Iteration 3: log likelihood = -2338.5193
Iteration 4: log likelihood = -2338.5193

```

Probit regression

Number of obs = 5940

LR chi2(19) = 3130.00

Prob > chi2 = 0.0000

Pseudo R2 = 0.4009

Log likelihood = -2338.5193

| Employed | Coef.     | Std. Err. | z      | P> z  | [95% Conf. Interval] |           |
|----------|-----------|-----------|--------|-------|----------------------|-----------|
| age      | .2200136  | .0075631  | 29.09  | 0.000 | .2051902             | .234837   |
| age2     | -.0027216 | .0000835  | -32.58 | 0.000 | -.0028853            | -.0025578 |
| Married  | .4931326  | .051643   | 9.55   | 0.000 | .3919141             | .5943511  |
| Q1       | .7584157  | .0735767  | 10.31  | 0.000 | .614208              | .9026235  |
| Q2       | .5049339  | .0898357  | 5.62   | 0.000 | .3288591             | .6810087  |
| Q3       | .3788537  | .0617057  | 6.14   | 0.000 | .2579127             | .4997948  |
| Q4       | .46473    | .0616138  | 7.54   | 0.000 | .3439692             | .5854907  |
| Q5       | .545053   | .1032919  | 5.28   | 0.000 | .3426045             | .7475015  |
| R1       | -.3251041 | .1685243  | -1.93  | 0.054 | -.6554057            | .0051976  |
| R2       | -.2565466 | .1328258  | -1.93  | 0.053 | -.5168803            | .0037872  |
| R3       | -.1615072 | .1388417  | -1.16  | 0.245 | -.433632             | .1106176  |
| R4       | -.207326  | .140309   | -1.48  | 0.140 | -.4823266            | .0676746  |
| R5       | .0904659  | .1482148  | 0.61   | 0.542 | -.2000298            | .3809616  |
| R6       | -.0959101 | .1397225  | -0.69  | 0.492 | -.3697611            | .1779408  |
| R8       | .0515328  | .1336144  | 0.39   | 0.700 | -.2103467            | .3134123  |
| R9       | .0260588  | .1416574  | 0.18   | 0.854 | -.2515846            | .3037022  |
| R10      | -.2158928 | .1208026  | -1.79  | 0.074 | -.4526616            | .0208759  |
| R11      | -.1216355 | .1211537  | -1.00  | 0.315 | -.3590923            | .1158213  |
| R12      | -.3415943 | .1217306  | -2.81  | 0.005 | -.5801819            | -.1030068 |
| _cons    | -3.651224 | .1887046  | -19.35 | 0.000 | -4.021079            | -3.28137  |

Note: 16 failures and 0 successes completely determined.

. margins, dydx(age age2 Married Q1 Q2 Q3 Q4 Q5)

Average marginal effects

Number of obs = 5940

Model VCE : OIM

Expression : Pr(Employed), predict()

dy/dx w.r.t. : age age2 Married Q1 Q2 Q3 Q4 Q5

|         | Delta-method |           |        |       |                      |          |
|---------|--------------|-----------|--------|-------|----------------------|----------|
|         | dy/dx        | Std. Err. | z      | P> z  | [95% Conf. Interval] |          |
| age     | .0487101     | .0013236  | 36.80  | 0.000 | .0461159             | .0513044 |
| age2    | -.0006025    | .0000135  | -44.55 | 0.000 | -.0006291            | -.000576 |
| Married | .1091776     | .0112132  | 9.74   | 0.000 | .0872001             | .131155  |
| Q1      | .1679102     | .0158738  | 10.58  | 0.000 | .136798              | .1990223 |
| Q2      | .1117903     | .0197372  | 5.66   | 0.000 | .073106              | .1504746 |
| Q3      | .0838767     | .013527   | 6.20   | 0.000 | .0573643             | .110389  |
| Q4      | .1028893     | .0134804  | 7.63   | 0.000 | .0764682             | .1293105 |
| Q5      | .1206725     | .0227323  | 5.31   | 0.000 | .0761181             | .165227  |

.  
 . generate Men = e(ll) in 18  
 (14418 missing values generated)

. mat R = r(table)

.  
 . local i = 1

. local j = 1

```
. while `i' <= 8 {
  2.     * Save the coefficient/marginal effect:
.     replace Men = R[1,`i'] in `j'
  3.     local j = `j' + 1
  4.     * Save standard error in row below marginal effect:
.     replace Men = R[2,`i'] in `j'
  5.     local j = `j' + 1
  6.     local i = `i' + 1
  7. }
```



|         |           | Delta-method |        |       |                      |           |
|---------|-----------|--------------|--------|-------|----------------------|-----------|
|         | dy/dx     | Std. Err.    | z      | P> z  | [95% Conf. Interval] |           |
| age     | .0514632  | .001559      | 33.01  | 0.000 | .0484076             | .0545188  |
| age2    | -.0006354 | .0000171     | -37.22 | 0.000 | -.0006688            | -.0006019 |
| Married | .0262895  | .0110497     | 2.38   | 0.017 | .0046326             | .0479464  |
| Q1      | .2519252  | .0161232     | 15.63  | 0.000 | .2203244             | .283526   |
| Q2      | .1346378  | .0211308     | 6.37   | 0.000 | .0932222             | .1760534  |
| Q3      | .14364    | .0152174     | 9.44   | 0.000 | .1138145             | .1734655  |
| Q4      | .147473   | .0136811     | 10.78  | 0.000 | .1206587             | .1742874  |
| Q5      | .0704728  | .02247       | 3.14   | 0.002 | .0264324             | .1145133  |

```

.
. generate Women = e(11) in 18
(14418 missing values generated)

. mat R = r(table)

.
. local i = 1

. local j = 1

. while `i' <= 8 {
2.      * Coefficients
.      replace Women = R[1,`i'] in `j'
3.      local j = `j' + 1
4.      * Standard errors
.      replace Women = R[2,`i'] in `j'
5.      local j = `j' + 1
6.      local i = `i' + 1
7.  }
(1 real change made)

. * Observations
. mat N = r(_N)

. replace Women = N[1,1] in 19
(1 real change made)

.
. * Save into table *
.
. keep Variable Men Women

. keep in 1/19
(14400 observations deleted)

. export excel using "$analysisdir\MarginalEffects", firstrow(varlabels) replace
file C:\My Documents\chapter14\MarginalEffects.xls saved

.
.
. * Using margins and estpost with estout and esttab
. use DatasetR.dta, clear

. recode jbstat (1 2 = 1) (3/10 = 0), gen(Employed)

```

(13412 differences between jbstat and Employed)

```
. label define Employed 1 "Employed/Self-Employed" 0 "Unemployed or Inactive"

. label value Employed Employed

.

. probit Employed age age2 Married Q1-Q5 R1-R6 R8-R12 if Female == 1
```

```
Iteration 0: log likelihood = -5008.2968
Iteration 1: log likelihood = -3649.4265
Iteration 2: log likelihood = -3533.4577
Iteration 3: log likelihood = -3532.244
Iteration 4: log likelihood = -3532.2439
```

```
Probit regression                                Number of obs   =       7228
                                                LR chi2(19)    =     2952.11
                                                Prob > chi2    =       0.0000
Log likelihood = -3532.2439                    Pseudo R2      =       0.2947
```

| Employed | Coef.     | Std. Err. | z      | P> z  | [95% Conf. Interval] |           |
|----------|-----------|-----------|--------|-------|----------------------|-----------|
| age      | .1856723  | .0067506  | 27.50  | 0.000 | .1724414             | .1989032  |
| age2     | -.0022923 | .0000768  | -29.86 | 0.000 | -.0024428            | -.0021418 |
| Married  | .0948491  | .0399136  | 2.38   | 0.017 | .0166199             | .1730783  |
| Q1       | .9089129  | .0610708  | 14.88  | 0.000 | .7892164             | 1.028609  |
| Q2       | .4857554  | .0769195  | 6.32   | 0.000 | .334996              | .6365148  |
| Q3       | .5182342  | .0559559  | 9.26   | 0.000 | .4085627             | .6279057  |
| Q4       | .5320633  | .0505783  | 10.52  | 0.000 | .4329317             | .6311949  |
| Q5       | .2542567  | .0812635  | 3.13   | 0.002 | .0949832             | .4135303  |
| R1       | -.0388104 | .1374721  | -0.28  | 0.778 | -.3082507            | .23063    |
| R2       | -.0199035 | .10588    | -0.19  | 0.851 | -.2274245            | .1876176  |
| R3       | .0021778  | .1120191  | 0.02   | 0.984 | -.2173756            | .2217312  |
| R4       | -.1015023 | .1132758  | -0.90  | 0.370 | -.3235187            | .1205142  |
| R5       | .0051333  | .1138275  | 0.05   | 0.964 | -.2179645            | .2282311  |
| R6       | -.04238   | .1100333  | -0.39  | 0.700 | -.2580413            | .1732813  |
| R8       | .1507979  | .1041317  | 1.45   | 0.148 | -.0532964            | .3548923  |
| R9       | .039735   | .1113795  | 0.36   | 0.721 | -.1785648            | .2580349  |
| R10      | -.1112129 | .093777   | -1.19  | 0.236 | -.2950124            | .0725866  |
| R11      | -.0322538 | .0942623  | -0.34  | 0.732 | -.2170044            | .1524969  |
| R12      | -.1716901 | .0941983  | -1.82  | 0.068 | -.3563154            | .0129352  |
| _cons    | -3.446174 | .158072   | -21.80 | 0.000 | -3.75599             | -3.136359 |

Note: 17 failures and 0 successes completely determined.

```
. estpost margins, dydx(age age2 Married Q1 Q2 Q3 Q4 Q5)
```

```
Average marginal effects                        Number of obs   =       7228
Model VCE      : OIM
```

```
Expression      : Pr(Employed), predict()
dy/dx w.r.t.    : age age2 Married Q1 Q2 Q3 Q4 Q5
```

|         | dy/dx     | Delta-method<br>Std. Err. | z      | P> z  | [95% Conf. Interval] |           |
|---------|-----------|---------------------------|--------|-------|----------------------|-----------|
| age     | .0514632  | .001559                   | 33.01  | 0.000 | .0484076             | .0545188  |
| age2    | -.0006354 | .0000171                  | -37.22 | 0.000 | -.0006688            | -.0006019 |
| Married | .0262895  | .0110497                  | 2.38   | 0.017 | .0046326             | .0479464  |
| Q1      | .2519252  | .0161232                  | 15.63  | 0.000 | .2203244             | .283526   |
| Q2      | .1346378  | .0211308                  | 6.37   | 0.000 | .0932222             | .1760534  |
| Q3      | .14364    | .0152174                  | 9.44   | 0.000 | .1138145             | .1734655  |
| Q4      | .147473   | .0136811                  | 10.78  | 0.000 | .1206587             | .1742874  |
| Q5      | .0704728  | .02247                    | 3.14   | 0.002 | .0264324             | .1145133  |

```
. estimates store employed
```

```
.

. estout employed using "$analysisdir\MarginalEffects2.txt", replace
(output written to C:\My Documents\chapter14\MarginalEffects2.txt)
```

```
. esttab employed using "$analysisdir\MarginalEffects3.txt", replace cell("b se")
(output written to C:\My Documents\chapter14\MarginalEffects3.txt)
```

```
.
.
.
. * 14.5 Graphs of Regression Results
. *****
```

```
. * 14.5.1 The Command parmest
. *-----
```

```
. use DatasetR.dta, clear
```

```
. regress LnW age age2 Female Married Q1-Q5, vce(robust)
```

```
Linear regression                                Number of obs =      6985
                                                F(   9,   6975) =   429.22
                                                Prob > F       =    0.0000
                                                R-squared      =    0.3777
                                                Root MSE      =    .63928
```

|  | LnW     | Coef.     | Robust<br>Std. Err. | t      | P> t  | [95% Conf. Interval] |           |
|--|---------|-----------|---------------------|--------|-------|----------------------|-----------|
|  | age     | .1270167  | .0042615            | 29.81  | 0.000 | .1186627             | .1353706  |
|  | age2    | -.0014477 | .0000521            | -27.76 | 0.000 | -.00155              | -.0013455 |
|  | Female  | -.5163072 | .0152177            | -33.93 | 0.000 | -.5461385            | -.4864758 |
|  | Married | .0832343  | .0178122            | 4.67   | 0.000 | .0483169             | .1181517  |
|  | Q1      | .7241378  | .0294961            | 24.55  | 0.000 | .6663164             | .7819593  |
|  | Q2      | .5051909  | .036249             | 13.94  | 0.000 | .4341319             | .5762499  |
|  | Q3      | .2988562  | .0289995            | 10.31  | 0.000 | .2420083             | .3557042  |
|  | Q4      | .1945445  | .0288056            | 6.75   | 0.000 | .1380767             | .2510123  |
|  | Q5      | .1258957  | .0374377            | 3.36   | 0.001 | .0525064             | .1992851  |
|  | _cons   | 4.573313  | .0816424            | 56.02  | 0.000 | 4.413269             | 4.733357  |

```
. parmest, format(estimate min95 max95) ///
> label saving("$analysisdir\RegGraph", replace)
file C:\My Documents\chapter14\RegGraph.dta saved
```

```
. use "$analysisdir\RegGraph", clear
```

```
. drop if parm == "_cons"
(1 observation deleted)
```

```
. * Otherwise the graph would look too small
```

```
. sencode parm,gen(parmid)
```

```
. eclplot estimate min95 max95 parmid, ///
> horizontal xline(0) scheme(s1manual) ///
> ylabel(1 "age" 2 "age square" 3 "female" ///
> 4 "married" 5 "Q1" 6 "Q2" 7 "Q3" 8 "Q4" ///
> 9 "Q5", labsize(small)) ///
> title(Wage Regression)
```

```
. * 14.5.2 The Command marginsplot
. *-----
```

```
. use DatasetR.dta, clear
```

```
. recode jbstat (1 2 = 1) (3/10 = 0), gen(Employed)
(13412 differences between jbstat and Employed)
```

```
. label define Employed 1 "Employed/Self-Employed" 0 "Unemployed or Inactive"
```



```
. label value Employed Employed
```

```
. rename qfachi edu
```

```
. label define Female 1 "Women" 0 "Men"
```

```
. label value Female Female
```

```
. * Models with polynomials
```

```
. probit Married c.age##c.age i.Female ib7.edu ib7.region2 nchild i.Employed ///
> if age>=18 & age<60, vce(robust)
```

```
Iteration 0: log pseudolikelihood = -5633.5166
Iteration 1: log pseudolikelihood = -4336.7666
Iteration 2: log pseudolikelihood = -4317.5251
Iteration 3: log pseudolikelihood = -4317.5033
Iteration 4: log pseudolikelihood = -4317.5033
```

```
Probit regression                                Number of obs   =      9004
                                                Wald chi2(21)   =    2047.81
                                                Prob > chi2     =      0.0000
Log pseudolikelihood = -4317.5033              Pseudo R2      =      0.2336
```

|                        |                 | -----     |                     |        |       |                      |           |
|------------------------|-----------------|-----------|---------------------|--------|-------|----------------------|-----------|
|                        | Married         | Coef.     | Robust<br>Std. Err. | z      | P> z  | [95% Conf. Interval] |           |
| -----                  |                 |           |                     |        |       |                      |           |
|                        | age             | .1185262  | .0098212            | 12.07  | 0.000 | .099277              | .1377755  |
|                        | c.age#c.age     | -.0010021 | .0001286            | -7.79  | 0.000 | -.0012541            | -.0007501 |
|                        | Female          |           |                     |        |       |                      |           |
|                        | Women           | -.0789265 | .0303249            | -2.60  | 0.009 | -.1383621            | -.0194908 |
|                        | edu             |           |                     |        |       |                      |           |
|                        | 1st degree      | .1175335  | .0576188            | 2.04   | 0.041 | .0046028             | .2304642  |
| hnd,hnc,teaching       |                 | .1572488  | .0729227            | 2.16   | 0.031 | .0143229             | .3001748  |
|                        | a level         | .043391   | .0528341            | 0.82   | 0.411 | -.0601619            | .1469438  |
|                        | o level         | .0037955  | .0520534            | 0.07   | 0.942 | -.0982272            | .1058183  |
|                        | cse             | -.0674319 | .0740653            | -0.91  | 0.363 | -.2125972            | .0777334  |
|                        | region2         |           |                     |        |       |                      |           |
|                        | north east      | .2271438  | .1176049            | 1.93   | 0.053 | -.0033577            | .4576452  |
|                        | north west      | .2596182  | .0928368            | 2.80   | 0.005 | .0776613             | .441575   |
| yorkshire & humber     |                 | .3490141  | .0994705            | 3.51   | 0.000 | .1540556             | .5439727  |
|                        | east midlands   | .3982539  | .1024628            | 3.89   | 0.000 | .1974305             | .5990773  |
|                        | west midlands   | .2912722  | .1036068            | 2.81   | 0.005 | .0882065             | .4943378  |
|                        | east of england | .3941984  | .0996757            | 3.95   | 0.000 | .1988377             | .5895592  |
|                        | south east      | .3280349  | .0920249            | 3.56   | 0.000 | .1476693             | .5084004  |
|                        | south west      | .3530615  | .0986217            | 3.58   | 0.000 | .1597665             | .5463566  |
|                        | wales           | .1998676  | .0842167            | 2.37   | 0.018 | .034806              | .3649292  |
|                        | scotland        | .1520642  | .0834303            | 1.82   | 0.068 | -.0114563            | .3155846  |
| northern ireland       |                 | -.0310677 | .0845886            | -0.37  | 0.713 | -.1968583            | .1347229  |
|                        | nchild          | .5539079  | .0262005            | 21.14  | 0.000 | .5025559             | .60526    |
|                        | Employed        |           |                     |        |       |                      |           |
| Employed/Self-Employed |                 | .4336978  | .0369437            | 11.74  | 0.000 | .3612895             | .5061061  |
| _cons                  |                 | -3.275382 | .1899553            | -17.24 | 0.000 | -3.647688            | -2.903076 |
| -----                  |                 |           |                     |        |       |                      |           |

```
. margins, at(age = (25(1)45))
```

```
Predictive margins                                Number of obs   =      9004
Model VCE      : Robust
Expression     : Pr(Married), predict()
```

|        |   |     |   |    |
|--------|---|-----|---|----|
| 1._at  | : | age | = | 25 |
| 2._at  | : | age | = | 26 |
| 3._at  | : | age | = | 27 |
| 4._at  | : | age | = | 28 |
| 5._at  | : | age | = | 29 |
| 6._at  | : | age | = | 30 |
| 7._at  | : | age | = | 31 |
| 8._at  | : | age | = | 32 |
| 9._at  | : | age | = | 33 |
| 10._at | : | age | = | 34 |
| 11._at | : | age | = | 35 |
| 12._at | : | age | = | 36 |
| 13._at | : | age | = | 37 |
| 14._at | : | age | = | 38 |
| 15._at | : | age | = | 39 |
| 16._at | : | age | = | 40 |
| 17._at | : | age | = | 41 |
| 18._at | : | age | = | 42 |
| 19._at | : | age | = | 43 |
| 20._at | : | age | = | 44 |
| 21._at | : | age | = | 45 |

|     | Delta-method |           | z      | P> z  | [95% Conf. Interval] |          |
|-----|--------------|-----------|--------|-------|----------------------|----------|
|     | Margin       | Std. Err. |        |       |                      |          |
| _at |              |           |        |       |                      |          |
| 1   | .4837026     | .0077887  | 62.10  | 0.000 | .468437              | .4989681 |
| 2   | .5068019     | .0073882  | 68.60  | 0.000 | .4923214             | .5212824 |
| 3   | .529253      | .0071567  | 73.95  | 0.000 | .5152261             | .54328   |
| 4   | .5509836     | .007073   | 77.90  | 0.000 | .5371207             | .5648465 |
| 5   | .5719337     | .0071025  | 80.53  | 0.000 | .558013              | .5858544 |
| 6   | .5920557     | .0072057  | 82.16  | 0.000 | .5779327             | .6061786 |
| 7   | .6113134     | .0073454  | 83.22  | 0.000 | .5969166             | .6257101 |
| 8   | .6296813     | .0074908  | 84.06  | 0.000 | .6149996             | .6443631 |
| 9   | .6471439     | .0076188  | 84.94  | 0.000 | .6322114             | .6620765 |
| 10  | .6636945     | .0077134  | 86.04  | 0.000 | .6485765             | .6788124 |
| 11  | .679334      | .0077646  | 87.49  | 0.000 | .6641156             | .6945523 |
| 12  | .6940701     | .0077672  | 89.36  | 0.000 | .6788467             | .7092936 |
| 13  | .7079164     | .0077195  | 91.70  | 0.000 | .6927864             | .7230465 |
| 14  | .720891      | .0076227  | 94.57  | 0.000 | .7059508             | .7358311 |
| 15  | .7330157     | .0074797  | 98.00  | 0.000 | .7183557             | .7476757 |
| 16  | .7443153     | .0072955  | 102.02 | 0.000 | .7300164             | .7586141 |
| 17  | .7548167     | .007076   | 106.67 | 0.000 | .7409479             | .7686854 |
| 18  | .764548      | .0068287  | 111.96 | 0.000 | .751164              | .7779321 |
| 19  | .7735384     | .0065622  | 117.88 | 0.000 | .7606767             | .7864002 |
| 20  | .781817      | .0062868  | 124.36 | 0.000 | .7694952             | .7941388 |
| 21  | .7894127     | .0060143  | 131.26 | 0.000 | .7776249             | .8012005 |

```
. marginsplot, scheme(slmanual) xlabel(25(5)45) ///
> xtitle("Age as of date of interview") ///
```

```

> note("Source: BHPS wave 18") ///
> saving("$analysisdir\predprob_age", replace)

Variables that uniquely identify margins: age
(file C:\My Documents\chapter14\predprob_age.gph saved)

.
.
. margins, dydx(age) at(age = (25(1)45))

Average marginal effects                                Number of obs   =       9004
Model VCE      : Robust

Expression      : Pr(Married), predict()
dy/dx w.r.t.    : age

1._at          : age              =          25
2._at          : age              =          26
3._at          : age              =          27
4._at          : age              =          28
5._at          : age              =          29
6._at          : age              =          30
7._at          : age              =          31
8._at          : age              =          32
9._at          : age              =          33
10._at         : age              =          34
11._at         : age              =          35
12._at         : age              =          36
13._at         : age              =          37
14._at         : age              =          38
15._at         : age              =          39
16._at         : age              =          40
17._at         : age              =          41
18._at         : age              =          42
19._at         : age              =          43
20._at         : age              =          44
21._at         : age              =          45

```

|     |          | Delta-method |       | z     | P> z     | [95% Conf. Interval] |  |
|-----|----------|--------------|-------|-------|----------|----------------------|--|
|     | dy/dx    | Std. Err.    |       |       |          |                      |  |
| age |          |              |       |       |          |                      |  |
| _at |          |              |       |       |          |                      |  |
| 1   | .0233961 | .0013147     | 17.80 | 0.000 | .0208194 | .0259729             |  |
| 2   | .0227883 | .0012417     | 18.35 | 0.000 | .0203546 | .025222              |  |
| 3   | .0221018 | .0011579     | 19.09 | 0.000 | .0198323 | .0243714             |  |
| 4   | .0213493 | .0010666     | 20.02 | 0.000 | .0192588 | .0234398             |  |
| 5   | .020543  | .0009708     | 21.16 | 0.000 | .0186403 | .0224457             |  |
| 6   | .0196949 | .0008736     | 22.54 | 0.000 | .0179827 | .0214072             |  |
| 7   | .0188162 | .0007781     | 24.18 | 0.000 | .0172911 | .0203413             |  |
| 8   | .0179171 | .0006873     | 26.07 | 0.000 | .0165701 | .0192641             |  |
| 9   | .017007  | .0006041     | 28.15 | 0.000 | .015823  | .018191              |  |

|    |          |          |       |       |          |          |
|----|----------|----------|-------|-------|----------|----------|
| 10 | .0160942 | .0005318 | 30.26 | 0.000 | .0150519 | .0171366 |
| 11 | .015186  | .0004736 | 32.07 | 0.000 | .0142578 | .0161142 |
| 12 | .0142886 | .0004322 | 33.06 | 0.000 | .0134414 | .0151358 |
| 13 | .0134071 | .0004094 | 32.75 | 0.000 | .0126046 | .0142095 |
| 14 | .0125457 | .0004045 | 31.02 | 0.000 | .0117529 | .0133385 |
| 15 | .0117078 | .0004146 | 28.24 | 0.000 | .0108952 | .0125205 |
| 16 | .0108959 | .0004358 | 25.00 | 0.000 | .0100418 | .01175   |
| 17 | .0101116 | .000464  | 21.79 | 0.000 | .0092022 | .011021  |
| 18 | .009356  | .0004962 | 18.85 | 0.000 | .0083835 | .0103286 |
| 19 | .0086296 | .0005304 | 16.27 | 0.000 | .00759   | .0096692 |
| 20 | .0079324 | .0005653 | 14.03 | 0.000 | .0068244 | .0090403 |
| 21 | .0072637 | .0006003 | 12.10 | 0.000 | .0060872 | .0084403 |

```

. marginsplot, scheme(slmanual) xlabel(25(5)45) ///
> xtitle("Age as of date of interview") ///
> note("Source: BHPS wave 18") ///
> saving("$analysisdir\ame_age", replace)

```

Variables that uniquely identify margins: age  
(file C:\My Documents\chapter14\ame\_age.gph saved)

```

. quietly margins Female#Employed, at(age = (25(5)45))

```

```

. marginsplot, scheme(slmanual) xlabel(25(5)45) ///
> legend(row(4)) xtitle("Age as of date of interview") ///
> note("Source: BHPS wave 18") ///
> title("Predicted probability of being married with 95% CIs") ///
> saving("$analysisdir\predprob_sexempagel", replace)

```

Variables that uniquely identify margins: age Female Employed  
(file C:\My Documents\chapter14\predprob\_sexempagel.gph saved)

```

.
.
.
. * 14.5.3 The Command marginsplot and interaction effects
. *-----
. * models with interaction effects: one continuous and one categorical variables
.
.
. probit Married c.age##i.Female i.Employed ib7.edu ib7.region2 nchild ///
> if age>=18 & age<60, vce(robust)

```

```

Iteration 0: log pseudolikelihood = -5633.5166
Iteration 1: log pseudolikelihood = -4365.6223
Iteration 2: log pseudolikelihood = -4342.1457
Iteration 3: log pseudolikelihood = -4342.1252
Iteration 4: log pseudolikelihood = -4342.1252

```

|                                   |               |   |         |
|-----------------------------------|---------------|---|---------|
| Probit regression                 | Number of obs | = | 9004    |
|                                   | Wald chi2(21) | = | 1871.73 |
|                                   | Prob > chi2   | = | 0.0000  |
| Log pseudolikelihood = -4342.1252 | Pseudo R2     | = | 0.2292  |

| Married                | Coef.     | Robust Std. Err. | z     | P> z  | [95% Conf. Interval] |
|------------------------|-----------|------------------|-------|-------|----------------------|
| age                    | .0462258  | .0019408         | 23.82 | 0.000 | .0424219 .0500296    |
| Female                 |           |                  |       |       |                      |
| Women                  | .1833708  | .0981743         | 1.87  | 0.062 | -.0090472 .3757889   |
| Female#c.age           |           |                  |       |       |                      |
| Women                  | -.0070576 | .0025548         | -2.76 | 0.006 | -.012065 -.0020503   |
| Employed               |           |                  |       |       |                      |
| Employed/Self-Employed | .4885556  | .0359413         | 13.59 | 0.000 | .4181118 .5589993    |
| edu                    |           |                  |       |       |                      |
| 1st degree             | .1635816  | .057888          | 2.83  | 0.005 | .0501231 .27704      |

|                    |           |          |        |       |           |           |
|--------------------|-----------|----------|--------|-------|-----------|-----------|
| hnd,hnc,teaching   | .2016169  | .0733991 | 2.75   | 0.006 | .0577573  | .3454764  |
| a level            | .0554689  | .0531162 | 1.04   | 0.296 | -.048637  | .1595747  |
| o level            | .031306   | .0523094 | 0.60   | 0.550 | -.0712186 | .1338306  |
| cse                | -.0254127 | .0734757 | -0.35  | 0.729 | -.1694224 | .1185971  |
| region2            |           |          |        |       |           |           |
| north east         | .2355428  | .1177345 | 2.00   | 0.045 | .0047874  | .4662982  |
| north west         | .2493057  | .0938455 | 2.66   | 0.008 | .0653719  | .4332396  |
| yorkshire & humber | .3493115  | .1001849 | 3.49   | 0.000 | .1529527  | .5456702  |
| east midlands      | .3837416  | .1034594 | 3.71   | 0.000 | .180965   | .5865183  |
| west midlands      | .2744295  | .1041066 | 2.64   | 0.008 | .0703843  | .4784747  |
| east of england    | .3736476  | .1004263 | 3.72   | 0.000 | .1768157  | .5704795  |
| south east         | .3142991  | .0928158 | 3.39   | 0.001 | .1323835  | .4962147  |
| south west         | .3216568  | .09938   | 3.24   | 0.001 | .1268755  | .5164381  |
| wales              | .1770075  | .0850868 | 2.08   | 0.037 | .0102405  | .3437745  |
| scotland           | .1430473  | .0844399 | 1.69   | 0.090 | -.0224519 | .3085464  |
| northern ireland   | -.0391007 | .085597  | -0.46  | 0.648 | -.2068678 | .1286664  |
| nchild             | .6112445  | .024755  | 24.69  | 0.000 | .5627256  | .6597633  |
| _cons              | -2.192637 | .1193622 | -18.37 | 0.000 | -2.426583 | -1.958692 |

. quietly margins Female, at(age = (25(5)45))

```
. marginsplot, scheme(slmanual) xlabel(25(5)45) ///
> xtitle("Age as of date of interview") ///
> note("Source: BHPS wave 18") ///
> title("Predicted prob. of being married with 95% CIs") ///
> saving("$analysisdir\predprob_sex", replace)
```

Variables that uniquely identify margins: age Female  
(file C:\My Documents\chapter14\predprob\_sex.gph saved)

```
.
.
. * models with interaction effects: two categorical variables
. probit Married c.age#c.age i.Female##i.Employed ib7.edu ib7.region2 nchild ///
> if age>=18 & age<60, vce(robust)
```

```
Iteration 0: log pseudolikelihood = -5633.5166
Iteration 1: log pseudolikelihood = -4330.575
Iteration 2: log pseudolikelihood = -4312.1588
Iteration 3: log pseudolikelihood = -4312.1385
Iteration 4: log pseudolikelihood = -4312.1385
```

|                                   |               |   |         |
|-----------------------------------|---------------|---|---------|
| Probit regression                 | Number of obs | = | 9004    |
|                                   | Wald chi2(22) | = | 2077.79 |
|                                   | Prob > chi2   | = | 0.0000  |
| Log pseudolikelihood = -4312.1385 | Pseudo R2     | = | 0.2346  |

| Married                | Coef.     | Robust Std. Err. | z     | P> z  | [95% Conf. Interval] |           |
|------------------------|-----------|------------------|-------|-------|----------------------|-----------|
| age                    | .1179834  | .009836          | 12.00 | 0.000 | .0987052             | .1372615  |
| c.age#c.age            | -.000996  | .0001287         | -7.74 | 0.000 | -.0012483            | -.0007436 |
| Female                 |           |                  |       |       |                      |           |
| Women                  | .1096632  | .0616326         | 1.78  | 0.075 | -.0111345            | .2304608  |
| Employed               |           |                  |       |       |                      |           |
| Employed/Self-Employed | .5913918  | .0560948         | 10.54 | 0.000 | .481448              | .7013355  |
| Female#Employed        |           |                  |       |       |                      |           |
| Women #                |           |                  |       |       |                      |           |
| Employed/Self-Employed | -.2447854 | .0718643         | -3.41 | 0.001 | -.3856368            | -.1039339 |
| edu                    |           |                  |       |       |                      |           |
| 1st degree             | .1191997  | .0576358         | 2.07  | 0.039 | .0062356             | .2321638  |
| hnd,hnc,teaching       | .1578266  | .073091          | 2.16  | 0.031 | .0145709             | .3010823  |
| a level                | .0467934  | .0529263         | 0.88  | 0.377 | -.0569402            | .1505271  |
| o level                | .0050769  | .0521358         | 0.10  | 0.922 | -.0971074            | .1072613  |

|                    |                 |           |          |        |       |           |           |
|--------------------|-----------------|-----------|----------|--------|-------|-----------|-----------|
|                    | cse             | -.0698534 | .0741471 | -0.94  | 0.346 | -.2151791 | .0754723  |
|                    | region2         |           |          |        |       |           |           |
|                    | north east      | .2310263  | .1177535 | 1.96   | 0.050 | .0002337  | .4618189  |
|                    | north west      | .2602359  | .0929847 | 2.80   | 0.005 | .0779892  | .4424826  |
| yorkshire & humber |                 | .3528018  | .099712  | 3.54   | 0.000 | .1573699  | .5482336  |
|                    | east midlands   | .4018641  | .1026229 | 3.92   | 0.000 | .2007268  | .6030013  |
|                    | west midlands   | .2916109  | .103769  | 2.81   | 0.005 | .0882274  | .4949945  |
|                    | east of england | .3935588  | .0997624 | 3.94   | 0.000 | .198028   | .5890896  |
|                    | south east      | .332049   | .092138  | 3.60   | 0.000 | .1514618  | .5126361  |
|                    | south west      | .3539439  | .0988095 | 3.58   | 0.000 | .1602808  | .5476069  |
|                    | wales           | .2029088  | .0843843 | 2.40   | 0.016 | .0375186  | .3682991  |
|                    | scotland        | .1554803  | .0836059 | 1.86   | 0.063 | -.0083841 | .3193448  |
| northern ireland   |                 | -.0257976 | .0847681 | -0.30  | 0.761 | -.19194   | .1403449  |
|                    | nchild          | .5473584  | .0262558 | 20.85  | 0.000 | .4958979  | .5988189  |
|                    | _cons           | -3.393767 | .1930128 | -17.58 | 0.000 | -3.772065 | -3.015469 |

```

. quietly margins, at(age = (25(5)45)) over(Female Employed)

```

```

.
. marginsplot, scheme(s1manual) ///
> legend(row(4)) xtitle("Age as of date of interview") ///
> note("Source: BHPS wave 18") ///
> title("Predicted probability of being married" "with 95% CIs") ///
> saving("$analysisdir\predprob_sexempage2", replace)

```

Variables that uniquely identify margins: age Female Employed  
(file C:\My Documents\chapter14\predprob\_sexempage2.gph saved)

```

.
.
.
. * 14.5.4 Combining multiple graphs
. *-----
.
. quietly margins Female if Employed==0, at(age = (25(5)45))

. marginsplot, scheme(s1manual) name(gr1) ///
> yscale(r(.3(.2).9)) ylabel(.3(.2).9) title("Not employed")

```

Variables that uniquely identify margins: age Female

```

. quietly margins Female if Employed==1, at(age = (25(5)45))

. marginsplot, scheme(s1manual) name(gr2) ///
> yscale(r(.3(.2).9)) ylabel(.3(.2).9) title("Employed")

```

Variables that uniquely identify margins: age Female

```

.
.
. graph combine gr1 gr2, ///
> title("Prediced Prob. of Being Married", size(medium)) ///
> scheme(s1manual) note("Source: BHPS wave 18") ///
> saving("$analysisdir\predprob_sexempage3", replace)
(file C:\My Documents\chapter14\predprob_sexempage3.gph saved)

```

```

.
. gclleg gr1 gr2, ///
> title("Predictive Probability of Being Married with 95% CIs", size(medium)) ///
> scheme(s1manual) note("Source: BHPS wave 18") ///
> saving("$analysisdir\predprob_sexempage4", replace)
(file C:\My Documents\chapter14\predprob_sexempage4.gph saved)

```

```

. graph drop _all

```

```

. log close
name: <unnamed>
log: C:\My Documents\chapter14\Example_Chapter14.log

```

log type: text  
closed on: 1 Sep 2014, 15:39:48

---
