# Supplementary material
Source: publisher site journal article supplement (https://uk.sagepub.com/sites/default/files/upm-binaries/74511_AppendixC_LogFiles.zip)
Supplement: Supplementary file 3 [file 74511_AppendixC_LogFiles.zip]

```
*****
* A Practical Guide to Using Panel Data
* Simonetta Longhi and Alita Nandi
* ISER, University of Essex
* Chapter 3
*****
```

```
-----
name: <unnamed>
log: C:\My Documents\Example_Chapter3.log
log type: text
opened on: 29 Jul 2014, 17:06:50
```

```
.
. * 3.2.1. Uploading datasets in Stata format
. *-----
.
. describe using "$datadir/aindresp"
```

```
Contains data
  obs:      10,264
  vars:      795
  size:    11,085,120
```

| variable name | storage type | display format | value label | variable label                           |
|---------------|--------------|----------------|-------------|------------------------------------------|
| ahid          | long         | %12.0g         |             | household identification number          |
| apno          | byte         | %8.0g          |             | person number                            |
| adoid         | byte         | %8.0g          | adoid       | date of interview: day                   |
| adoim         | byte         | %8.0g          | adoim       | date of interview: month                 |
| aivsoih       | byte         | %8.0g          | aivsoih     | hour interview began                     |
| aivsoim       | byte         | %8.0g          | aivsoim     | minute interview began                   |
| alknbrd       | byte         | %8.0g          | alknbrd     | likes present neighbourhood              |
| alkmove       | byte         | %8.0g          | alkmove     | prefers to move house                    |
| alkmovy       | byte         | %8.0g          | alkmovy     | prefers to move: main reason             |
| aplever       | byte         | %8.0g          | aplever     | always resident at present address       |
| aplnowm       | byte         | %8.0g          | aplnowm     | month moved to present address           |
| aplnowy       | byte         | %8.0g          | aplnowy     | year moved to present address            |
| aplb4d        | int          | %8.0g          | aplb4d      | district of previous residence           |
| aplb4c        | byte         | %8.0g          | aplb4c      | country of last residence                |
| aplbordnd     | int          | %8.0g          | aplbordnd   | district of birth                        |
| aplbordnc     | byte         | %8.0g          | aplbordnc   | country of birth                         |
| ayr2uk        | byte         | %8.0g          | ayr2uk      | year came to britain                     |
| adobm         | byte         | %8.0g          | adobm       | month of birth                           |
| adoby         | int          | %8.0g          | adoby       | year of birth                            |
| asex          | byte         | %8.0g          | asex        | sex                                      |
| apaju         | byte         | %8.0g          | apaju       | father not working when resp. aged 14    |
| apasoc        | int          | %8.0g          | apasoc      | father's occupation (soc), resp. aged 14 |
| apasemp       | byte         | %8.0g          | apasemp     | father self employed, resp. aged 14      |
| apaboss       | byte         | %8.0g          | apaboss     | father had employees, resp. aged 14      |
| apamngr       | byte         | %8.0g          | apamngr     | father was manager, resp. aged 14        |
| amaju         | byte         | %8.0g          | amaju       | mother not working when resp. aged 14    |
| amasoc        | int          | %8.0g          | amasoc      | mother's occupation (soc), resp. aged 14 |
| amasemp       | byte         | %8.0g          | amasemp     | mother self employed, resp. aged 14      |
| amaboss       | byte         | %8.0g          | amaboss     | mother had employees, resp. aged 14      |
| amamngr       | byte         | %8.0g          | amamngr     | mother was manager, resp. aged 14        |
| amlstat       | byte         | %8.0g          | amlstat     | present legal marital status             |
| aschool       | byte         | %8.0g          | aschool     | never went to /still at school           |
| ascend        | byte         | %8.0g          | ascend      | school leaving age                       |
| asctype       | byte         | %8.0g          | asctype     | type of school attended                  |
| ascnow        | byte         | %8.0g          | ascnow      | still at school                          |
| afetype       | byte         | %8.0g          | afetype     | type of further education attended       |
| afenow        | byte         | %8.0g          | afenow      | still in further education               |
| afeend        | byte         | %8.0g          | afeend      | further education leaving age            |
| aqfhas        | byte         | %8.0g          | aqfhas      | has listed post school qualification     |
| aqfa          | byte         | %8.0g          | aqfa        | qualifications: youth training cert      |
| aqfb          | byte         | %8.0g          | aqfb        | qualifications: trade apprenticeship     |
| aqfc          | byte         | %8.0g          | aqfc        | qualifications: clerical or commercial   |
| aqfd          | byte         | %8.0g          | aqfd        | qualifications: city and guilds pt i     |
| aqfe          | byte         | %8.0g          | aqfe        | qualifications: city and guilds pt ii    |

|         |      |       |         |                                           |
|---------|------|-------|---------|-------------------------------------------|
| aqff    | byte | %8.0g | aqff    | qualifications: city and guilds pt iii    |
| aqfg    | byte | %8.0g | aqfg    | qualifications: onc ond bec gen cert      |
| aqfh    | byte | %8.0g | aqfh    | qualifications: hnc hnd bec higher cert   |
| aqfi    | byte | %8.0g | aqfi    | qualifications: nursing sen srn scm       |
| aqfj    | byte | %8.0g | aqfj    | qualifications: teaching                  |
| aqfk    | byte | %8.0g | aqfk    | qualifications: university diploma        |
| aqfl    | byte | %8.0g | aqfl    | qualifications: univ/cnaa first degree    |
| aqfm    | byte | %8.0g | aqfm    | qualifications: univ/cnaa higher degree   |
| aqfn    | byte | %8.0g | aqfn    | post school qualifications: other         |
| aqfed   | byte | %8.0g | aqfed   | has listed school qualification           |
| aqfedb  | byte | %8.0g | aqfedb  | qualifications: any cses grade 2-5        |
| anqfedb | byte | %8.0g | anqfedb | qualifications: no. cses grade 2-5        |
| aqfedc  | byte | %8.0g | aqfedc  | qualifications: any cses grade 1          |
| anqfedc | byte | %8.0g | anqfedc | qualifications: no. cses grade 1          |
| aqfedd  | byte | %8.0g | aqfedd  | qualifications: any gcscs grade d-g       |
| anqfedd | byte | %8.0g | anqfedd | qualifications: no. gcscs grade d-g       |
| aqfede  | byte | %8.0g | aqfede  | qualifications: any gcscs grade a-c       |
| anqfede | byte | %8.0g | anqfede | qualifications: no. gcscs grade a-c       |
| aqfedf  | byte | %8.0g | aqfedf  | qualifications: any o levels pre-1975     |
| anqfedf | byte | %8.0g | anqfedf | qualifications: no. o levels pre-1975     |
| aqfedg  | byte | %8.0g | aqfedg  | qualifications: any ols a-c post-1975     |
| anqfedg | byte | %8.0g | anqfedg | qualifications: no. ols a-c post-1975     |
| aqfedh  | byte | %8.0g | aqfedh  | qualifications: any ols d-e post-1975     |
| anqfedh | byte | %8.0g | anqfedh | qualifications: no. ols d-e post-1975     |
| aqfedi  | byte | %8.0g | aqfedi  | qualifications: any higher school certs   |
| anqfedi | byte | %8.0g | anqfedi | qualifications: no. higher school certs   |
| aqfedj  | byte | %8.0g | aqfedj  | qualifications: any a levels              |
| anqfedj | byte | %8.0g | anqfedj | qualifications: no. a level passes        |
| aqfeda  | byte | %8.0g | aqfeda  | qualifications: any school cert/ matric   |
| anqfeda | byte | %8.0g | anqfeda | qualifications: no. school cert/ matric   |
| aqfedk  | byte | %8.0g | aqfedk  | qualifications: any sces grade d-e or 4-5 |
| anqfedk | byte | %8.0g | anqfedk | qualifications: no. sces grade d-e or 4-5 |
| aqfedl  | byte | %8.0g | aqfedl  | qualifications: any o grades a-c or 1-3   |
| anqfedl | byte | %8.0g | anqfedl | qualifications: no. o grades a-c or 1-3   |
| aqfedm  | byte | %8.0g | aqfedm  | qualifications: any standard grades 4-7   |
| anqfedm | byte | %8.0g | anqfedm | qualifications: no. standard grades 4-7   |
| aqfedn  | byte | %8.0g | aqfedn  | qualifications: any standard grades 1-3   |
| anqfedn | byte | %8.0g | anqfedn | qualifications: no. standard grades 1-3   |
| aqfedo  | byte | %8.0g | aqfedo  | qualifications: any higher grades         |
| anqfedo | byte | %8.0g | anqfedo | qualifications: no. higher grade passes   |
| aqfedp  | byte | %8.0g | aqfedp  | qualifications: any 6th year certs        |
| anqfedp | byte | %8.0g | anqfedp | qualifications: no. 6th year certs        |
| aqfedq  | byte | %8.0g | aqfedq  | qualifications: any slcs lower grade      |
| anqfedq | byte | %8.0g | anqfedq | qualifications: no. slc lower grades      |
| aqfedr  | byte | %8.0g | aqfedr  | qualifications: any slcs higher grade     |
| anqfedr | byte | %8.0g | anqfedr | qualifications: no. slcs higher grade     |
| aqfeds  | byte | %8.0g | aqfeds  | qualifications: any others                |
| anqfeds | byte | %8.0g | anqfeds | qualifications: no. of others             |
| aeaage  | byte | %8.0g | aeaage  | whether working age                       |
| aednew  | byte | %8.0g | aednew  | any training/education since 1.9.90       |
| aednew1 | byte | %8.0g | aednew1 | job training: to develop general skills   |
| aednew2 | byte | %8.0g | aednew2 | job training: to prepare for future job   |
| aednew3 | byte | %8.0g | aednew3 | job training: to increase skills          |
| aednew4 | byte | %8.0g | aednew4 | job training: to improve skills           |
| aednewd | int  | %8.0g | aednewd | no. of days training/educ since 1.9.90    |
| apaperr | byte | %8.0g | apaperr | newspapers: normally reads a daily        |
| apaper1 | byte | %8.0g | apaper1 | newspapers: 1st one mentioned             |
| apaper2 | byte | %8.0g | apaper2 | newspapers: 2nd one mentioned             |
| apaperm | byte | %8.0g | apaperm | newspaper most frequently read            |
| apaperp | byte | %8.0g | apaperp | own newspapers politics                   |
| aivda   | byte | %8.0g | aivda   | ic: demog section respondent alone        |
| aivdb   | byte | %8.0g | aivdb   | ic: demog section partner present         |
| aivdc   | byte | %8.0g | aivdc   | ic: demog section other adults present    |
| aivdd   | byte | %8.0g | aivdd   | ic: demog section children present        |
| ahlstat | byte | %8.0g | ahlstat | health over last 12 months                |
| ahlzest | byte | %8.0g | ahlzest | energy compared with people of same age   |
| ahldsbl | byte | %8.0g | ahldsbl | registered disabled                       |
| ahlprb  | byte | %8.0g | ahlprb  | health problems: none                     |
| ahlprb1 | byte | %8.0g | ahlprb1 | health problems: 1st mention              |
| ahlprb2 | byte | %8.0g | ahlprb2 | health problems: 2nd mention              |
| ahlprb3 | byte | %8.0g | ahlprb3 | health problems: 3rd mention              |
| ahlprb4 | byte | %8.0g | ahlprb4 | health problems: 4th mention              |
| ahl1t   | byte | %8.0g | ahl1t   | health limits daily activities            |

|          |      |       |          |                                          |
|----------|------|-------|----------|------------------------------------------|
| ahllta   | byte | %8.0g | ahllta   | health hinders doing the housework       |
| ahlltb   | byte | %8.0g | ahlltb   | health hinders climbing the stairs       |
| ahlltc   | byte | %8.0g | ahlltc   | health hinders getting dressed           |
| ahlltd   | byte | %8.0g | ahlltd   | health hinders walking more than 10 mins |
| ahllte   | byte | %8.0g | ahllte   | health no hindrance to listed activities |
| ahlltw   | byte | %8.0g | ahlltw   | health limits type or amount of work     |
| ahlendw  | byte | %8.0g | ahlendw  | health prohibits some types of work      |
| ahlltwa  | byte | %8.0g | ahlltwa  | how far health limits amount of work     |
| ahl2gp   | byte | %8.0g | ahl2gp   | number of visits to gp since 1.9.90      |
| axdts    | byte | %8.0g | axdts    | whether accident since 1.9.90            |
| anxdts   | byte | %8.0g | anxdts   | no. of serious accidents since 1.9.90    |
| axdt1m   | byte | %8.0g | axdt1m   | month of first accident                  |
| axdt1y   | byte | %8.0g | axdt1y   | year of first accident                   |
| axdt2m   | byte | %8.0g | axdt2m   | month of second accident                 |
| axdt2y   | byte | %8.0g | axdt2y   | year of second accident                  |
| axdt3m   | byte | %8.0g | axdt3m   | month of third accident                  |
| axdt3y   | byte | %8.0g | axdt3y   | year of third accident                   |
| axdt1pl  | byte | %8.0g | axdt1pl  | location of first accident               |
| axdt2pl  | byte | %8.0g | axdt2pl  | location of second accident              |
| axdt3pl  | byte | %8.0g | axdt3pl  | location of third accident               |
| ahosp    | byte | %8.0g | ahosp    | hospital in-patient since 1.9.90         |
| ahospd   | int  | %8.0g | ahospd   | hospital in-patient: days since 1.9.90   |
| ahospch  | byte | %8.0g | ahospch  | hospital stays were for childbirth       |
| ahospnhs | byte | %8.0g | ahospnhs | hospital stays nhs or private            |
| ahlsv    | byte | %8.0g | ahlsv    | health service: used any since 1.9.90    |
| ahlsva   | byte | %8.0g | ahlsva   | health service: used health visitor      |
| ahlsvan  | byte | %8.0g | ahlsvan  | health service: health visitor nhs/priv  |
| ahlsvaf  | byte | %8.0g | ahlsvaf  | health service: health visitor free/paid |
| ahlsvb   | byte | %8.0g | ahlsvb   | welfare service: used home help          |
| ahlsvbn  | byte | %8.0g | ahlsvbn  | welfare service: home help nhs/private   |
| ahlsvbf  | byte | %8.0g | ahlsvbf  | welfare service: home help free/paid     |
| ahlsvc   | byte | %8.0g | ahlsvc   | welfare service: used meals on wheels    |
| ahlsvcn  | byte | %8.0g | ahlsvcn  | welfare service:meals on wheels nhs/priv |
| ahlsvcf  | byte | %8.0g | ahlsvcf  | welfare service:meals on wheels free/pd  |
| ahlsvd   | byte | %8.0g | ahlsvd   | welfare service: used social worker      |
| ahlsvdn  | byte | %8.0g | ahlsvdn  | welfare service: social worker nhs/priv  |
| ahlsvdf  | byte | %8.0g | ahlsvdf  | welfare service: social worker free/paid |
| ahlsve   | byte | %8.0g | ahlsve   | health service: used chiropodist         |
| ahlsven  | byte | %8.0g | ahlsven  | health service: chiropodist nhs/private  |
| ahlsvef  | byte | %8.0g | ahlsvef  | health service: chiropodist free/paid    |
| ahlsvf   | byte | %8.0g | ahlsvf   | health service:used alternative medicine |
| ahlsvfn  | byte | %8.0g | ahlsvfn  | health service:alt. medicine nhs/private |
| ahlsvff  | byte | %8.0g | ahlsvff  | health service: alt. medicine free/paid  |
| ahlsvg   | byte | %8.0g | ahlsvg   | welfare service: used psychotherapist    |
| ahlsvgn  | byte | %8.0g | ahlsvgn  | welfare service: psychotherapy nhs/priv  |
| ahlsvgf  | byte | %8.0g | ahlsvgf  | welfare service: psychotherapy free/paid |
| ahlsvh   | byte | %8.0g | ahlsvh   | welfare service: used speech therapist   |
| ahlsvhn  | byte | %8.0g | ahlsvhn  | welfare service: speech therapy nhs/priv |
| ahlsvhf  | byte | %8.0g | ahlsvhf  | welfare service:speech therapy free/paid |
| ahlsvi   | byte | %8.0g | ahlsvi   | health service: used physiotherapist     |
| ahlsvin  | byte | %8.0g | ahlsvin  | health service: physiotherapy nhs/priv   |
| ahlsvif  | byte | %8.0g | ahlsvif  | health service: physiotherapy free/paid  |
| ahlsvj   | byte | %8.0g | ahlsvj   | welfare service: used other service (i)  |
| ahlsvjn  | byte | %8.0g | ahlsvjn  | welfare service: other serv (i) nhs/priv |
| ahlsvjf  | byte | %8.0g | ahlsvjf  | welfare service:other serv (i) free/paid |
| ahlsvk   | byte | %8.0g | ahlsvk   | welfare service: used other service (ii) |
| ahlsvkn  | byte | %8.0g | ahlsvkn  | welfare service:other serv (ii) nhs/priv |
| ahlsvkf  | byte | %8.0g | ahlsvkf  | welfare service:other serv(ii) free/paid |
| ahlcka   | byte | %8.0g | ahlcka   | health check-up: dental                  |
| ahlckan  | byte | %8.0g | ahlckan  | health check-up: dental nhs/private      |
| ahlckb   | byte | %8.0g | ahlckb   | health check-up: eyetest                 |
| ahlckbn  | byte | %8.0g | ahlckbn  | health check-up: eyetest nhs/private     |
| ahlckc   | byte | %8.0g | ahlckc   | health check-up: chest or other x-ray    |
| ahlckcn  | byte | %8.0g | ahlckcn  | health check-up: chest x-ray nhs/private |
| ahlckd   | byte | %8.0g | ahlckd   | health check-up: blood pressure          |
| ahlckdn  | byte | %8.0g | ahlckdn  | health check-up: blood pressure nhs/priv |
| ahlcke   | byte | %8.0g | ahlcke   | health check-up: cholesterol test        |
| ahlcken  | byte | %8.0g | ahlcken  | health check-up: cholesterol nhs/private |
| ahlckf   | byte | %8.0g | ahlckf   | health check-up: other checks            |
| ahlckfn  | byte | %8.0g | ahlckfn  | health check-up:other checks nhs/private |
| ahlckg   | byte | %8.0g | ahlckg   | health check-up: cervical smear          |
| ahlckgn  | byte | %8.0g | ahlckgn  | health check-up: cervical smear nhs/priv |
| ahlckh   | byte | %8.0g | ahlckh   | health check-up: breast screen           |

|          |       |        |          |                                          |
|----------|-------|--------|----------|------------------------------------------|
| ahlckhn  | byte  | %8.0g  | ahlckhn  | health check-up: breast screen nhs/priv  |
| asmoker  | byte  | %8.0g  | asmoker  | smoker                                   |
| ancigs   | byte  | %8.0g  | ancigs   | number of cigarettes smoked              |
| aophla   | byte  | %8.0g  | aophla   | all health care should be free           |
| aophlb   | byte  | %8.0g  | aophlb   | compulsory private insurance if can pay  |
| aophlc   | byte  | %8.0g  | aophlc   | unfair that wealth buys medical priority |
| arachl6  | byte  | %8.0g  | arachl6  | responsible for dependent child under 16 |
| ahlch    | byte  | %8.0g  | ahlch    | resps child/ren have health problems     |
| ahlch1   | byte  | %8.0g  | ahlch1   | pno of 1st child with health problems    |
| ahlch2   | byte  | %8.0g  | ahlch2   | pno of 2nd child with health problems    |
| ahlch3   | byte  | %8.0g  | ahlch3   | pno of 3rd child with health problems    |
| ahlch4   | byte  | %8.0g  | ahlch4   | pno of 4th child with health problems    |
| aaidhh   | byte  | %8.0g  | aaidhh   | cares for handicapped/other in household |
| aaidhua  | byte  | %8.0g  | aaidhua  | pno of 1st cared for person              |
| aaidhub  | byte  | %8.0g  | aaidhub  | pno of 2nd cared for person              |
| aaidhuc  | byte  | %8.0g  | aaidhuc  | pno of 3rd cared for person              |
| aaidxhh  | byte  | %8.0g  | aaidxhh  | provides care for non-resident person    |
| anaidxhh | byte  | %8.0g  | anaidxhh | number of non-residents cared for        |
| aaidhu1  | byte  | %8.0g  | aaidhu1  | caring:relation to 1st non-res dependant |
| aaidhu2  | byte  | %8.0g  | aaidhu2  | caring:relation to 2nd non-res dependant |
| aaidpl1  | byte  | %8.0g  | aaidpl1  | 1st non-res dependant in institution     |
| aaidpl2  | byte  | %8.0g  | aaidpl2  | 2nd non-res dependant in institution     |
| aaidhrs  | byte  | %8.0g  | aaidhrs  | hours per week spent caring              |
| aivma    | byte  | %8.0g  | aivma    | health section: respondent alone         |
| aivmb    | byte  | %8.0g  | aivmb    | health section: partner present          |
| aivmc    | byte  | %8.0g  | aivmc    | health section: other adults present     |
| aivmd    | byte  | %8.0g  | aivmd    | health section: child/ren present        |
| ajbhas   | byte  | %8.0g  | ajbhas   | did paid work last week                  |
| ajboff   | byte  | %8.0g  | ajboff   | no work last week but has job            |
| ajboffy  | byte  | %8.0g  | ajboffy  | reason off work last week                |
| ajbterm  | byte  | %8.0g  | ajbterm  | current job: permanent or temporary      |
| ajbsoc   | int   | %8.0g  | ajbsoc   | occupation (soc): current main job       |
| ajbsic   | int   | %8.0g  | ajbsic   | industry (sic) of employer: current job  |
| ajbsemp  | byte  | %8.0g  | ajbsemp  | employee or self-employed: current job   |
| ajbmngr  | byte  | %8.0g  | ajbmngr  | managerial duties: current job           |
| ajbsect  | byte  | %8.0g  | ajbsect  | employing organisation: current job      |
| ajbsize  | byte  | %8.0g  | ajbsize  | number employed at workplace: current jo |
| ajbmix   | byte  | %8.0g  | ajbmix   | sex segregation: current job             |
| ajbhrs   | byte  | %8.0g  | ajbhrs   | no. of hours normally worked per week    |
| ajbot    | byte  | %8.0g  | ajbot    | no. of overtime hours in normal week     |
| ajbotpd  | byte  | %8.0g  | ajbotpd  | no. of hours worked as paid overtime     |
| ajbhr1k  | byte  | %8.0g  | ajbhr1k  | preference over hours worked             |
| ajbtime  | byte  | %8.0g  | ajbtime  | times of day usually work                |
| ajbonus  | byte  | %8.0g  | ajbonus  | pay includes bonuses or profit share     |
| ajbrise  | byte  | %8.0g  | ajbrise  | pay includes annual increments           |
| atujbpl  | byte  | %8.0g  | atujbpl  | union or staff association at workplace  |
| atuin1   | byte  | %8.0g  | atuin1   | member of workplace union                |
| atuin2   | byte  | %8.0g  | atuin2   | member of any trade union or similar     |
| ajbopps  | byte  | %8.0g  | ajbopps  | promotion opportunities in current job   |
| ajbed    | byte  | %8.0g  | ajbed    | had work related training since 1.9.90   |
| ajbed1   | byte  | %8.0g  | ajbed1   | training: induction for current job      |
| ajbed2   | byte  | %8.0g  | ajbed2   | training:increase skills for current job |
| ajbed3   | byte  | %8.0g  | ajbed3   | training: improve skills for current job |
| ajbed4   | byte  | %8.0g  | ajbed4   | training: preparation for future jobs    |
| ajbed5   | byte  | %8.0g  | ajbed5   | training: to develop skills generally    |
| ajbedd   | int   | %8.0g  | ajbedd   | training: days spent since 1.9.90        |
| ajbpen   | byte  | %8.0g  | ajbpen   | pension: employer runs a pension scheme  |
| ajbpenm  | byte  | %8.0g  | ajbpenm  | pension: member of employers scheme      |
| ajbpl    | byte  | %8.0g  | ajbpl    | work location                            |
| ajbttwt  | int   | %8.0g  | ajbttwt  | minutes spent travelling to work         |
| ajbttwm  | byte  | %8.0g  | ajbttwm  | main means of travel to work             |
| ajbsat1  | byte  | %8.0g  | ajbsat1  | job satisfaction: promotion prospects    |
| ajbsat2  | byte  | %8.0g  | ajbsat2  | job satisfaction: total pay              |
| ajbsat3  | byte  | %8.0g  | ajbsat3  | job satisfaction: relations with boss    |
| ajbsat4  | byte  | %8.0g  | ajbsat4  | job satisfaction: security               |
| ajbsat5  | byte  | %8.0g  | ajbsat5  | job satisfaction: use of initiative      |
| ajbsat6  | byte  | %8.0g  | ajbsat6  | job satisfaction: work itself            |
| ajbsat7  | byte  | %8.0g  | ajbsat7  | job satisfaction: hours worked           |
| ajbsat   | byte  | %8.0g  | ajbsat   | job satisfaction: overall                |
| apaygl   | long  | %12.0g | apaygl   | gross pay at last payment                |
| apaygw   | float | %9.0g  | apaygw   | pay period (weeks): last gross pay       |
| apaynl   | long  | %12.0g | apaynl   | take-home pay at last payment            |
| apaynw   | float | %9.0g  | apaynw   | pay period (weeks): last take-home pay   |

|         |       |        |         |                                           |
|---------|-------|--------|---------|-------------------------------------------|
| apayslp | byte  | %8.0g  | apayslp | pay slip seen by interviewer              |
| apayusl | byte  | %8.0g  | apayusl | was last gross pay the usual amount       |
| apayu   | int   | %8.0g  | apayu   | usual pay                                 |
| apayuw  | float | %9.0g  | apayuw  | usual pay: pay period (weeks)             |
| apayug  | byte  | %8.0g  | apayug  | usual pay: gross/net of deductions        |
| apaydf1 | byte  | %8.0g  | apaydf1 | last pay unusual: included back pay       |
| apaydf2 | byte  | %8.0g  | apaydf2 | last pay unusual: included holiday pay    |
| apaydf3 | byte  | %8.0g  | apaydf3 | last pay unusual: included tax refund     |
| apaydf4 | byte  | %8.0g  | apaydf4 | last pay unusual: included sick pay       |
| apaydf5 | byte  | %8.0g  | apaydf5 | last pay unusual: sick without pay        |
| apaydf6 | byte  | %8.0g  | apaydf6 | last pay unusual: included maternity pay  |
| apaydf7 | byte  | %8.0g  | apaydf7 | last pay unusual through overtime         |
| apaydf8 | byte  | %8.0g  | apaydf8 | last pay unusual for other reason         |
| ajbbgd  | byte  | %8.0g  | ajbbgd  | day started current job                   |
| ajbbgm  | byte  | %8.0g  | ajbbgm  | month started current job                 |
| ajbbgy  | byte  | %8.0g  | ajbbgy  | year started current job                  |
| ajbbgly | byte  | %8.0g  | ajbbgly | started job after 1.9.90                  |
| apayly  | long  | %12.0g | apayly  | usual pay at 1.9.90                       |
| apaylyw | float | %9.0g  | apaylyw | usual pay at 1.9.90: pay period (weeks)   |
| apaylyg | byte  | %8.0g  | apaylyg | usual pay at 1.9.90: gross/net deductions |
| ajbhrly | byte  | %8.0g  | ajbhrly | usual total hours per week at 1.9.90      |
| ajbotly | byte  | %8.0g  | ajbotly | usual hours of paid overtime at 1.9.90    |
| apays   | long  | %12.0g | apays   | starting pay, job start after 1.9.90      |
| apaysw  | float | %9.0g  | apaysw  | starting pay period (weeks): current job  |
| apaysg  | byte  | %8.0g  | apaysg  | starting pay gross or net: current job    |
| ajbhrbg | byte  | %8.0g  | ajbhrbg | starting hours per week: current job      |
| ajbotbg | byte  | %8.0g  | ajbotbg | starting hours paid o/time: current job   |
| apaygyr | long  | %12.0g | apaygyr | total gross earnings in last 12 months    |
| apaygya | byte  | %8.0g  | apaygya | accuracy of total gross earnings          |
| ajsboss | byte  | %8.0g  | ajsboss | s/emp: hires employees                    |
| ajssize | byte  | %8.0g  | ajssize | s/emp: number of employees                |
| ajshrs  | byte  | %8.0g  | ajshrs  | s/emp: hours normally worked per week     |
| ajshrlk | byte  | %8.0g  | ajshrlk | s/emp: preference over hours worked       |
| ajstime | byte  | %8.0g  | ajstime | s/emp: times of day usually work          |
| ajstype | byte  | %8.0g  | ajstype | s/emp: nature of employment               |
| ajsaccs | byte  | %8.0g  | ajsaccs | s/emp: draws up profit/loss accounts      |
| ajsprf  | long  | %12.0g | ajsprf  | s/emp: net profit in last yearly account  |
| ajsprbm | byte  | %8.0g  | ajsprbm | s/emp: date accounts began: month         |
| ajsprby | byte  | %8.0g  | ajsprby | s/emp: date accounts began: year          |
| ajsprem | byte  | %8.0g  | ajsprem | s/emp: date accounts ended: month         |
| ajsprey | byte  | %8.0g  | ajsprey | s/emp: date accounts ended: year          |
| ajspayl | long  | %12.0g | ajspayl | s/emp: last gross earnings                |
| ajspybm | byte  | %8.0g  | ajspybm | s/emp: month gross pay accounts began     |
| ajspyby | byte  | %8.0g  | ajspyby | s/emp: year gross pay accounts began      |
| ajspyem | byte  | %8.0g  | ajspyem | s/emp: month gross pay accounts ended     |
| ajspyey | byte  | %8.0g  | ajspyey | s/emp: year gross pay accounts ended      |
| ajspl   | byte  | %8.0g  | ajspl   | s/emp: work location                      |
| ajsttwt | int   | %8.0g  | ajsttwt | s/emp: minutes spent travelling to work   |
| ajsttwm | byte  | %8.0g  | ajsttwm | s/emp: main means of travel to work       |
| ajssat1 | byte  | %8.0g  | ajssat1 | s/emp: job satisfaction: total pay        |
| ajssat2 | byte  | %8.0g  | ajssat2 | s/emp: job satisfaction: job security     |
| ajssat3 | byte  | %8.0g  | ajssat3 | s/emp: job satisfaction: initiative       |
| ajssat4 | byte  | %8.0g  | ajssat4 | s/emp: job satisfaction: work itself      |
| ajssat5 | byte  | %8.0g  | ajssat5 | s/emp: job satisfaction: hours worked     |
| ajssat  | byte  | %8.0g  | ajssat  | s/emp: job satisfaction: overall          |
| ajsbgd  | byte  | %8.0g  | ajsbgd  | s/emp: day started present job            |
| ajsbgm  | byte  | %8.0g  | ajsbgm  | s/emp: month started present job          |
| ajsbgy  | byte  | %8.0g  | ajsbgy  | s/emp: year started present job           |
| arach12 | byte  | %8.0g  | arach12 | responsible for dependent child under 12  |
| ajbchc1 | byte  | %8.0g  | ajbchc1 | childcare: 1st mention                    |
| ajbchc2 | byte  | %8.0g  | ajbchc2 | childcare: 2nd mention                    |
| ajbchc3 | byte  | %8.0g  | ajbchc3 | childcare: 3rd mention                    |
| axpchcf | byte  | %8.0g  | axpchcf | childcare: free or paid for               |
| axpch   | int   | %8.0g  | axpch   | childcare: weekly cost                    |
| ahuxpch | byte  | %8.0g  | ahuxpch | who pays for childcare                    |
| ahunurs | byte  | %8.0g  | ahunurs | who cares for ill children                |
| ajulk1  | byte  | %8.0g  | ajulk1  | looked for work in last 7 days            |
| ajulk4  | byte  | %8.0g  | ajulk4  | looked for work in last 4 weeks           |
| ajulkjb | byte  | %8.0g  | ajulkjb | would like a regular paid job             |
| ajuspec | byte  | %8.0g  | ajuspec | looking for /would like a particular job  |
| ajusoc  | int   | %8.0g  | ajusoc  | occupation (soc) of job sought            |
| ajupayx | int   | %8.0g  | ajupayx | expected weekly net pay: jobseeker        |
| ajuhrsx | byte  | %8.0g  | ajuhrsx | expected work hours: jobseeker            |

|         |      |       |         |                                          |
|---------|------|-------|---------|------------------------------------------|
| ajupayl | int  | %8.0g | ajupayl | lowest net pay considered: jobseeker     |
| ajuhrs1 | byte | %8.0g | ajuhrs1 | expected hours for lowest pay jobseeker  |
| ajbaspl | byte | %8.0g | ajbaspl | most important aspect of a job           |
| ajbasp2 | byte | %8.0g | ajbasp2 | second most important aspect of a job    |
| ajblky1 | byte | %8.0g | ajblky1 | most important reason for working        |
| ajblky2 | byte | %8.0g | ajblky2 | second most important reason for working |
| ajbub   | byte | %8.0g | ajbub   | currently signed on at ub office         |
| ajbuby  | byte | %8.0g | ajbuby  | reason why signed on at ub office        |
| aj2has  | byte | %8.0g | aj2has  | has a second paid job                    |
| aj2soc  | int  | %8.0g | aj2soc  | occupation (soc), second job             |
| aj2semp | byte | %8.0g | aj2semp | employee or self employed, second job    |
| aj2hrs  | byte | %8.0g | aj2hrs  | no. of hours worked per month, 2nd job   |
| aj2pay  | int  | %8.0g | aj2pay  | gross earnings from 2nd jobs last month  |
| ajbhha  | byte | %8.0g | ajbhha  | family commitments prevented job search  |
| ajbhbb  | byte | %8.0g | ajbhbb  | family commitments prevented taking job  |
| ajbhbc  | byte | %8.0g | ajbhbc  | family commitments prevented job change  |
| ajbhhd  | byte | %8.0g | ajbhhd  | family commitments required job change   |
| ajbhhe  | byte | %8.0g | ajbhhe  | family commitments required leaving job  |
| ajbhbf  | byte | %8.0g | ajbhbf  | family commitments led to less work hrs  |
| ajbhh   | byte | %8.0g | ajbhh   | responsibilities which affected work     |
| aivea   | byte | %8.0g | aivea   | employment section: respondent alone     |
| aiveb   | byte | %8.0g | aiveb   | employment section: partner present      |
| aivec   | byte | %8.0g | aivec   | employment section: other adult present  |
| aived   | byte | %8.0g | aived   | employment section: child present        |
| ajbstat | byte | %8.0g | ajbstat | current labour force status              |
| acjsbgd | byte | %8.0g | acjsbgd | day current labour force status began    |
| acjsbgm | byte | %8.0g | acjsbgm | month current labour force status began  |
| acjsbgy | byte | %8.0g | acjsbgy | year current labour force status began   |
| acjsbly | byte | %8.0g | acjsbly | ic:current l.f. spell began after 1.9.90 |
| anjbs   | byte | %8.0g | anjbs   | number of periods of paid employment     |
| ajbhad  | byte | %8.0g | ajbhad  | ever had paid employment                 |
| ajlend  | byte | %8.0g | ajlend  | year left last job                       |
| ajlsoc  | int  | %8.0g | ajlsoc  | occupation (soc) of last job             |
| ajlsic  | int  | %8.0g | ajlsic  | industry (sic) of last job               |
| ajlsemp | byte | %8.0g | ajlsemp | employee or self employed, last job      |
| ajlboss | byte | %8.0g | ajlboss | hired employees, last job                |
| ajlmngr | byte | %8.0g | ajlmngr | managerial duties, last job              |
| ajlsize | byte | %8.0g | ajlsize | number employed at workplace, last job   |
| aivja   | byte | %8.0g | aivja   | job hist section: respondent alone       |
| aivjb   | byte | %8.0g | aivjb   | job hist section: partner present        |
| aivjc   | byte | %8.0g | aivjc   | job hist section: other adults present   |
| aivjd   | byte | %8.0g | aivjd   | job hist section: child/ren present      |
| aopsoca | byte | %8.0g | aopsoca | ordinary people share nations wealth     |
| aopsocb | byte | %8.0g | aopsocb | one law for rich and one for poor        |
| aopsocc | byte | %8.0g | aopsocc | private enterprise solves economic probs |
| aopsocd | byte | %8.0g | aopsocd | public services ought to be state owned  |
| aopsoce | byte | %8.0g | aopsoce | govt. has obligation to provide jobs     |
| aopsocf | byte | %8.0g | aopsocf | strong trade unions protect employees    |
| aopcls1 | byte | %8.0g | aopcls1 | see self as belonging to a social class  |
| aopcls2 | byte | %8.0g | aopcls2 | subjective social class membership       |
| aopcls3 | byte | %8.0g | aopcls3 | social class affects opportunities       |
| avotel  | byte | %8.0g | avotel  | supports a particular political party    |
| avote2  | byte | %8.0g | avote2  | closer to one political party than other |
| avote3  | byte | %8.0g | avote3  | party which would vote for tomorrow      |
| avote4  | byte | %8.0g | avote4  | which political party closest to         |
| avote5  | byte | %8.0g | avote5  | strength of support for stated party     |
| avote6  | byte | %8.0g | avote6  | level of interest in politics            |
| aoprlg1 | byte | %8.0g | aoprlg1 | religion                                 |
| aoprlg2 | byte | %8.0g | aoprlg2 | attendance at religious services         |
| aoprlg3 | byte | %8.0g | aoprlg3 | religion makes a difference to life      |
| arace   | byte | %8.0g | arace   | ethnic group membership                  |
| aorgm   | byte | %8.0g | aorgm   | member of one of listed organisations    |
| aorgma  | byte | %8.0g | aorgma  | member of political party                |
| aorgaa  | byte | %8.0g | aorgaa  | active in political party                |
| aorgmb  | byte | %8.0g | aorgmb  | member of trade union                    |
| aorgab  | byte | %8.0g | aorgab  | active in trade union                    |
| aorgmc  | byte | %8.0g | aorgmc  | member of environmental group            |
| aorgac  | byte | %8.0g | aorgac  | active in environmental group            |
| aorgmd  | byte | %8.0g | aorgmd  | member of parents association            |
| aorgad  | byte | %8.0g | aorgad  | active in parents association            |
| aorgme  | byte | %8.0g | aorgme  | member of tenants or residents group     |
| aorgae  | byte | %8.0g | aorgae  | active in tenants group                  |
| aorgmf  | byte | %8.0g | aorgmf  | member of religious group                |

|         |      |       |         |                                          |
|---------|------|-------|---------|------------------------------------------|
| aorgaf  | byte | %8.0g | aorgaf  | active in religious group                |
| aorgmg  | byte | %8.0g | aorgmg  | member of voluntary service group        |
| aorgag  | byte | %8.0g | aorgag  | active in voluntary group                |
| aorgmh  | byte | %8.0g | aorgmh  | member of other community group          |
| aorgah  | byte | %8.0g | aorgah  | active in other community group          |
| aorgmi  | byte | %8.0g | aorgmi  | member of social group                   |
| aorgai  | byte | %8.0g | aorgai  | active in social group                   |
| aorgmj  | byte | %8.0g | aorgmj  | member of sports club                    |
| aorgaj  | byte | %8.0g | aorgaj  | active in sports club                    |
| aorgmk  | byte | %8.0g | aorgmk  | member of womens institute               |
| aorgak  | byte | %8.0g | aorgak  | active in womens institute               |
| aorgml  | byte | %8.0g | aorgml  | member of womens group                   |
| aorgal  | byte | %8.0g | aorgal  | active in womens group                   |
| aorgmm  | byte | %8.0g | aorgmm  | member of other organisation             |
| aorgam  | byte | %8.0g | aorgam  | active in other organisation             |
| aorga   | byte | %8.0g | aorga   | active in any of listed organisations    |
| aoppol1 | byte | %8.0g | aoppol1 | most important political issue           |
| aoppol2 | byte | %8.0g | aoppol2 | second most important political issue    |
| aoppol3 | byte | %8.0g | aoppol3 | priority: low inflation/low unemployment |
| aoppol4 | byte | %8.0g | aoppol4 | priority: living standards/environment   |
| aivva   | byte | %8.0g | aivva   | values section: respondent alone         |
| aivvb   | byte | %8.0g | aivvb   | values section: partner present          |
| aivvc   | byte | %8.0g | aivvc   | values section: other adults present     |
| aivvd   | byte | %8.0g | aivvd   | values section: child/ren present        |
| af101   | byte | %8.0g | af101   | income: ni retirement pension            |
| af102   | byte | %8.0g | af102   | income: pension from previous employer   |
| af103   | byte | %8.0g | af103   | income: pension from spouses ex-employer |
| af104   | byte | %8.0g | af104   | income: private pension or annuity       |
| af105   | byte | %8.0g | af105   | income: widow or war widows pension      |
| af106   | byte | %8.0g | af106   | income: widowed mothers allowance        |
| af116   | byte | %8.0g | af116   | income: severe disablement allowance     |
| af117   | byte | %8.0g | af117   | income: invalidity pension               |
| af118   | byte | %8.0g | af118   | income: industrial injury allowance      |
| af119   | byte | %8.0g | af119   | income: attendance allowance             |
| af120   | byte | %8.0g | af120   | income: mobility allowance               |
| af121   | byte | %8.0g | af121   | income: invalid care allowance           |
| af122   | byte | %8.0g | af122   | income: war disability pension           |
| af133   | byte | %8.0g | af133   | income: unemployment benefit (ub)        |
| af132   | byte | %8.0g | af132   | income: income support (is)              |
| af131   | byte | %8.0g | af131   | income: both ub and is                   |
| af134   | byte | %8.0g | af134   | income: ni sickness benefit              |
| af135   | byte | %8.0g | af135   | income: child benefit                    |
| af136   | byte | %8.0g | af136   | income: one parent benefit               |
| af137   | byte | %8.0g | af137   | income: family credit                    |
| af138   | byte | %8.0g | af138   | income: maternity allowance              |
| af139   | byte | %8.0g | af139   | income: housing benefit                  |
| af140   | byte | %8.0g | af140   | income: community charge benefit         |
| af141   | byte | %8.0g | af141   | income: other state benefit              |
| af151   | byte | %8.0g | af151   | income: educational grant                |
| af152   | byte | %8.0g | af152   | income: trade union payments             |
| af153   | byte | %8.0g | af153   | income: maintenance or alimony           |
| af154   | byte | %8.0g | af154   | income: payments from relations          |
| af155   | byte | %8.0g | af155   | income: rent from lodgers                |
| af156   | byte | %8.0g | af156   | income: rent from other property         |
| af157   | byte | %8.0g | af157   | income: foster allowance                 |
| af158   | byte | %8.0g | af158   | income: sickness or accident insurance   |
| af159   | byte | %8.0g | af159   | income: any other payment                |
| anfl    | byte | %8.0g | anfl    | income: total number of cited sources    |
| afisbm  | byte | %8.0g | afisbm  | month income support/supp. benefit began |
| afisby  | byte | %8.0g | afisby  | year income support/supp. benefit began  |
| afisit  | byte | %8.0g | afisit  | financial situation                      |
| afisitc | byte | %8.0g | afisitc | change in financial position last year   |
| afisitx | byte | %8.0g | afisitx | financial expectations for year ahead    |
| afiyrdi | byte | %8.0g | afiyrdi | income last year from dividends/interest |
| asave   | byte | %8.0g | asave   | saves from current income                |
| asaved  | int  | %8.0g | asaved  | amount saved each month                  |
| asavey  | byte | %8.0g | asavey  | reason for saving                        |
| abankac | byte | %8.0g | abankac | holds a personal savings account         |
| abankjt | byte | %8.0g | abankjt | holds joint account with other in h/hold |
| abankj1 | byte | %8.0g | abankj1 | pno 1st person with whom shares account  |
| abankj2 | byte | %8.0g | abankj2 | pno 2nd person with whom shares account  |
| ahudraw | byte | %8.0g | ahudraw | who draws from the joint bank account    |
| afthh   | byte | %8.0g | afthh   | transfers money within household         |

|          |       |        |          |                                          |
|----------|-------|--------|----------|------------------------------------------|
| afthh1   | byte  | %8.0g  | afthh1   | 1st recipient of internal money transfer |
| afthh11  | byte  | %8.0g  | afthh11  | pays rent to 1st person                  |
| afthh12  | byte  | %8.0g  | afthh12  | pays housekeeping to 1st person          |
| afthh13  | byte  | %8.0g  | afthh13  | pays board to 1st person                 |
| afthh14  | byte  | %8.0g  | afthh14  | pays allowance to 1st person             |
| afthh15  | byte  | %8.0g  | afthh15  | pays h/hold bills or food to 1st person  |
| afthh16  | byte  | %8.0g  | afthh16  | makes other transfer to 1st person       |
| afthh1v  | int   | %8.0g  | afthh1v  | amount transferred to 1st person         |
| afthh1w  | float | %9.0g  | afthh1w  | weeks covered by transfer to 1st person  |
| afthh2   | byte  | %8.0g  | afthh2   | 2nd recipient of internal money transfer |
| afthh21  | byte  | %8.0g  | afthh21  | pays rent to 2nd person                  |
| afthh22  | byte  | %8.0g  | afthh22  | pays housekeeping to 2nd person          |
| afthh23  | byte  | %8.0g  | afthh23  | pays board to 2nd person                 |
| afthh24  | byte  | %8.0g  | afthh24  | pays allowance to 2nd person             |
| afthh25  | byte  | %8.0g  | afthh25  | pays h/hold bills or food to 2nd person  |
| afthh26  | byte  | %8.0g  | afthh26  | makes other transfer to 2nd person       |
| afthh2v  | int   | %8.0g  | afthh2v  | amount transferred to 2nd person         |
| afthh2w  | float | %9.0g  | afthh2w  | weeks covered by transfer to 2nd person  |
| afthh3   | byte  | %8.0g  | afthh3   | 3rd recipient of internal money transfer |
| afthh31  | byte  | %8.0g  | afthh31  | pays rent to 3rd person                  |
| afthh32  | byte  | %8.0g  | afthh32  | pays housekeeping to 3rd person          |
| afthh33  | byte  | %8.0g  | afthh33  | pays board to 3rd person                 |
| afthh34  | byte  | %8.0g  | afthh34  | pays allowance to 3rd person             |
| afthh35  | byte  | %8.0g  | afthh35  | pays h/hold bills or food to 3rd person  |
| afthh36  | byte  | %8.0g  | afthh36  | makes other transfer to 3rd person       |
| afthh3v  | int   | %8.0g  | afthh3v  | amount transferred to 3rd person         |
| afthh3w  | float | %9.0g  | afthh3w  | weeks covered by transfer to 3rd person  |
| aftexhh  | byte  | %8.0g  | aftexhh  | transfers money to non-resident person   |
| aftexa   | byte  | %8.0g  | aftexa   | relationship to 1st non-res recipient    |
| aftexa1  | byte  | %8.0g  | aftexa1  | maintenance payment to 1st non-resident  |
| aftexa2  | byte  | %8.0g  | aftexa2  | hh bills payment to 1st non-resident     |
| aftexa3  | byte  | %8.0g  | aftexa3  | education payment to 1st non-resident    |
| aftexa4  | byte  | %8.0g  | aftexa4  | allowance/spending money to 1st non-res  |
| aftexa5  | byte  | %8.0g  | aftexa5  | loan repayment to 1st non-resident       |
| aftexa6  | byte  | %8.0g  | aftexa6  | other payment to 1st non-resident        |
| aftexb   | byte  | %8.0g  | aftexb   | relationship to 2nd non-res recipient    |
| aftexb1  | byte  | %8.0g  | aftexb1  | maintenance payment to 2nd non-resident  |
| aftexb2  | byte  | %8.0g  | aftexb2  | hh bills payment to 2nd non-resident     |
| aftexb3  | byte  | %8.0g  | aftexb3  | education payment to 2nd non-resident    |
| aftexb4  | byte  | %8.0g  | aftexb4  | allowance/spending money to 2nd non-res  |
| aftexb5  | byte  | %8.0g  | aftexb5  | loan repayment to 2nd non-resident       |
| aftexb6  | byte  | %8.0g  | aftexb6  | other payment to 2nd non-resident        |
| aftexc   | byte  | %8.0g  | aftexc   | relationship to 3rd non-res recipient    |
| aftexc1  | byte  | %8.0g  | aftexc1  | maintenance payment to 3rd non-resident  |
| aftexc2  | byte  | %8.0g  | aftexc2  | hh bills payment to 3rd non-resident     |
| aftexc3  | byte  | %8.0g  | aftexc3  | education payment to 3rd non-resident    |
| aftexc4  | byte  | %8.0g  | aftexc4  | allowance/spending money to 3rd non-res  |
| aftexc5  | byte  | %8.0g  | aftexc5  | loan repayment to 3rd non-resident       |
| aftexc6  | byte  | %8.0g  | aftexc6  | other payment to 3rd non-resident        |
| axpself  | int   | %8.0g  | axpself  | amount of weekly personal spending       |
| aspinhh  | byte  | %8.0g  | aspinhh  | whether living with spouse or partner    |
| ahubuys  | byte  | %8.0g  | ahubuys  | who does the grocery shopping (couples)  |
| ahufrys  | byte  | %8.0g  | ahufrys  | who does the cooking (couples)           |
| ahumops  | byte  | %8.0g  | ahumops  | who does the cleaning (couples)          |
| ahuiiron | byte  | %8.0g  | ahuiiron | who does the washing/ironing (couples)   |
| ahhchl2  | byte  | %8.0g  | ahhchl2  | child/ren under 12 in household          |
| ahusits  | byte  | %8.0g  | ahusits  | who is responsible for childcare         |
| ahuruns  | byte  | %8.0g  | ahuruns  | how household finances are organised     |
| ahuboss  | byte  | %8.0g  | ahuboss  | who has last say in financial decisions  |
| ahupays  | byte  | %8.0g  | ahupays  | who is responsible for h/hold bills      |
| ahukeep  | byte  | %8.0g  | ahukeep  | who is responsible for housekeeping      |
| ahuasks  | byte  | %8.0g  | ahuasks  | consultation about spending on self      |
| ahushop  | byte  | %8.0g  | ahushop  | who does the grocery shopping (singles)  |
| ahucook  | byte  | %8.0g  | ahucook  | who does the cooking (singles)           |
| ahudust  | byte  | %8.0g  | ahudust  | who does the cleaning (singles)          |
| ahuwash  | byte  | %8.0g  | ahuwash  | who does the washing /ironing (singles)  |
| adriver  | byte  | %8.0g  | adriver  | holds a full driving licence             |
| acaruse  | byte  | %8.0g  | acaruse  | has use of car or van                    |
| acarowr  | byte  | %8.0g  | acarowr  | who owns the car                         |
| acarowrp | byte  | %8.0g  | acarowrp | pno of car owner, if household member    |
| acarjob  | byte  | %8.0g  | acarjob  | whose employer provides company car      |
| acarval  | long  | %12.0g | acarval  | value of car                             |
| aivfa    | byte  | %8.0g  | aivfa    | h/hold finance section: respondent alone |



|         |       |        |         |                                          |
|---------|-------|--------|---------|------------------------------------------|
| aivfb   | byte  | %8.0g  | aivfb   | h/hold finance section: partner alone    |
| aivfc   | byte  | %8.0g  | aivfc   | h/hold finance section: adult present    |
| aivfd   | byte  | %8.0g  | aivfd   | h/hold finance section: child present    |
| aivfoih | byte  | %8.0g  | aivfoih | hour interview finished                  |
| aivfoim | byte  | %8.0g  | aivfoim | minute interview finished                |
| aivsc   | byte  | %8.0g  | aivsc   | ic: self completion document             |
| aiv1    | byte  | %8.0g  | aiv1    | others present during interview          |
| aiv2    | byte  | %8.0g  | aiv2    | did others influence interview           |
| aiv4    | byte  | %8.0g  | aiv4    | cooperation of respondent                |
| aiv5    | byte  | %8.0g  | aiv5    | completion of tracking schedule          |
| aiv6a   | byte  | %8.0g  | aiv6a   | problems affecting interview: eyesight   |
| aiv6b   | byte  | %8.0g  | aiv6b   | problems affecting interview: hearing    |
| aiv6c   | byte  | %8.0g  | aiv6c   | problems affecting interview: reading    |
| aiv6d   | byte  | %8.0g  | aiv6d   | problems affecting interview: english    |
| aiv6e   | byte  | %8.0g  | aiv6e   | problems affecting interview: language   |
| aiv6f   | byte  | %8.0g  | aiv6f   | problems affecting interview: interpret  |
| aiv7    | byte  | %8.0g  | aiv7    | pno of interpreter                       |
| aghqa   | byte  | %8.0g  | aghqa   | ghq: concentration                       |
| aghqb   | byte  | %8.0g  | aghqb   | ghq: loss of sleep                       |
| aghqc   | byte  | %8.0g  | aghqc   | ghq: playing a useful role               |
| aghqd   | byte  | %8.0g  | aghqd   | ghq: capable of making decisions         |
| aghqe   | byte  | %8.0g  | aghqe   | ghq: constantly under strain             |
| aghqf   | byte  | %8.0g  | aghqf   | ghq: problem overcoming difficulties     |
| aghqg   | byte  | %8.0g  | aghqg   | ghq: enjoy day-to-day activities         |
| aghqh   | byte  | %8.0g  | aghqh   | ghq: ability to face problems            |
| aghqi   | byte  | %8.0g  | aghqi   | ghq: unhappy or depressed                |
| aghqj   | byte  | %8.0g  | aghqj   | ghq: losing confidence                   |
| aghqk   | byte  | %8.0g  | aghqk   | ghq: believe in self-worth               |
| aghql   | byte  | %8.0g  | aghql   | ghq: general happiness                   |
| aopfama | byte  | %8.0g  | aopfama | pre-school child suffers if mother works |
| aopfamb | byte  | %8.0g  | aopfamb | family suffers if woman works full time  |
| aopfamc | byte  | %8.0g  | aopfamc | woman and family happier if she works    |
| aopfamd | byte  | %8.0g  | aopfamd | husband and wife should both contribute  |
| aopfame | byte  | %8.0g  | aopfame | full time job makes women independent    |
| aopfamf | byte  | %8.0g  | aopfamf | husband should earn, wife stay at home   |
| aopfamg | byte  | %8.0g  | aopfamg | children need father as much as mother   |
| aopfamh | byte  | %8.0g  | aopfamh | employers should help with childcare     |
| aopfami | byte  | %8.0g  | aopfami | single parents are as good as couples    |
| assupa  | byte  | %8.0g  | assupa  | is there someone who will listen         |
| assupb  | byte  | %8.0g  | assupb  | is there someone to help in a crisis     |
| assupc  | byte  | %8.0g  | assupc  | is there someone you can relax with      |
| assupd  | byte  | %8.0g  | assupd  | anyone who really appreciates you        |
| assupe  | byte  | %8.0g  | assupe  | anyone you can count on to offer comfort |
| assup1  | byte  | %8.0g  | assup1  | sex of closest friend                    |
| pid     | long  | %12.0g |         | cross-wave person identifier             |
| aivfio  | byte  | %8.0g  | aivfio  | individual interview outcome             |
| aiodc   | byte  | %8.0g  | aiodc   | document check                           |
| axrwght | float | %9.0g  |         | x-sectional respondent weight            |
| axewght | float | %9.0g  |         | x-sectional enumerated individual weight |
| aregion | byte  | %8.0g  | aregion | region / metropolitan area               |
| aprrs2i | byte  | %8.0g  | aprrs2i | relationship of proxy to informant       |
| apripn  | byte  | %8.0g  | apripn  | person number of informant               |
| aprwhy  | byte  | %8.0g  | aprwhy  | reason for proxy                         |
| aprfehq | byte  | %8.0g  | aprfehq | proxy's highest fe qualification         |
| aprsehq | byte  | %8.0g  | aprsehq | proxy's highest school qualification     |
| aprfitb | byte  | %8.0g  | aprfitb | proxy's personal income, banded          |
| aprbft  | byte  | %8.0g  | aprbft  | proxy's job full or part time            |
| ahgr2r  | byte  | %8.0g  | ahgr2r  | relationship to reference person         |
| amastat | byte  | %8.0g  | amastat | marital status                           |
| ahgspn  | byte  | %8.0g  | ahgspn  | pno of spouse/partner                    |
| ahgest  | byte  | %8.0g  | ahgest  | employment status - hh grid              |
| ahgfno  | byte  | %8.0g  | ahgfno  | pno of father                            |
| ahgmno  | byte  | %8.0g  | ahgmno  | pno of mother                            |
| ahgjny  | byte  | %8.0g  | ahgjny  | whether joined household since 1.9.90    |
| ahgmjn  | byte  | %8.0g  | ahgmjn  | month joined household                   |
| ahgyjn  | byte  | %8.0g  | ahgyjn  | year joined household                    |
| aage    | byte  | %8.0g  | aage    | age at date of interview                 |
| aage12  | byte  | %8.0g  | aage12  | age at 1.12.1991                         |
| abutype | byte  | %8.0g  | abutype | benefit unit type                        |
| abuno   | byte  | %8.0g  | abuno   | benefit unit number                      |
| anchild | byte  | %8.0g  | anchild | number of own children in household      |
| ahoh    | byte  | %8.0g  | ahoh    | conventional head of household indicator |
| ahhsize | byte  | %8.0g  | ahhsize | number of people in household            |

|          |       |       |          |                                           |
|----------|-------|-------|----------|-------------------------------------------|
| ahhtype  | byte  | %8.0g | ahhtype  | household type                            |
| atenure  | byte  | %8.0g | atenure  | housing tenure                            |
| aqfedhi  | byte  | %8.0g | aqfedhi  | highest educational qualification         |
| aqfvoc   | byte  | %8.0g | aqfvoc   | has vocational qualifications             |
| aqfachi  | byte  | %8.0g | aqfachi  | highest academic qualification            |
| ajbft    | byte  | %8.0g | ajbft    | employed full time                        |
| aedgen   | int   | %8.0g | aedgen   | days spent in general training            |
| aedspec  | int   | %8.0g | aedspec  | days spent in specific training           |
| apargsc  | byte  | %8.0g | apargsc  | rg social class: father's job             |
| apaseg   | byte  | %8.0g | apaseg   | socio economic group: father's job        |
| apagold  | byte  | %8.0g | apagold  | goldthorpe social class: father's job     |
| apaisco  | str4  | %4s   | apaisco  | international soc: father's job           |
| apacssm  | float | %9.0g | apacssm  | cambridge scale males: father's job       |
| apacssf  | float | %9.0g | apacssf  | cambridge scale females: father's job     |
| apahgs   | float | %9.0g | apahgs   | hope - goldthorpe scale: father's job     |
| apasec   | int   | %8.0g | apasec   | socio-economic class: father's job        |
| amargsc  | byte  | %8.0g | amargsc  | rg social class: mother's job             |
| amaseg   | byte  | %8.0g | amaseg   | socio economic group: mother's job        |
| amagold  | byte  | %8.0g | amagold  | goldthorpe social class: mother's job     |
| amaisco  | str4  | %4s   | amaisco  | international soc: mother's job           |
| amacssm  | float | %9.0g | amacssm  | cambridge scale males: mother's job       |
| amacssf  | float | %9.0g | amacssf  | cambridge scale females: mother's job     |
| amahgs   | float | %9.0g | amahgs   | hope - goldthorpe scale: mother's job     |
| amasec   | int   | %8.0g | amasec   | socio-economic class: mother's job        |
| apayg    | float | %9.0g | apayg    | gross rate of pay per month: last payment |
| apayn    | float | %9.0g | apayn    | net rate of pay per month: last payment   |
| apaygu   | float | %9.0g | apaygu   | usual gross pay per month: current job    |
| apaynu   | float | %9.0g | apaynu   | usual net pay per month: current job      |
| apaygty  | float | %9.0g | apaygty  | usual monthly gross pay: sept this year   |
| apaygly  | float | %9.0g | apaygly  | usual monthly gross pay: sept year ago    |
| apaynty  | float | %9.0g | apaynty  | usual monthly net pay: sept this year     |
| apaynly  | float | %9.0g | apaynly  | usual monthly net pay: sept year ago      |
| ajsprof  | float | %9.0g | ajsprof  | monthly self employed profit              |
| ajspayg  | float | %9.0g | ajspayg  | monthly self employed gross pay           |
| acjsten  | int   | %8.0g | acjsten  | length (days) of current labour market    |
| acjswk9  | float | %9.0g | acjswk9  | weeks in current spell: year to 1.9.91    |
| ajlid    | byte  | %8.0g | ajlid    | identifier of latest job                  |
| ajlyid   | byte  | %8.0g | ajlyid   | identifier of job spell at 1.9.90         |
| ajtyid   | byte  | %8.0g | ajtyid   | identifier of job spell at 1.9.91         |
| ajbseg   | byte  | %8.0g | ajbseg   | socio economic group: present job         |
| ajbgold  | byte  | %8.0g | ajbgold  | goldthorpe social class: present job      |
| ajbrgsc  | byte  | %8.0g | ajbrgsc  | rg social class: present job              |
| ajbisco  | str4  | %4s   | ajbisco  | international soc: present job            |
| ajbcssm  | float | %9.0g | ajbcssm  | cambridge scale males: present job        |
| ajbcssf  | float | %9.0g | ajbcssf  | cambridge scale females: present job      |
| ajbhgs   | float | %9.0g | ajbhgs   | hope - goldthorpe scale: present job      |
| ajbsec   | int   | %8.0g | ajbsec   | socio-economic class: current job         |
| anjbwks  | float | %9.0g | anjbwks  | annual weeks employed: year to sept 1     |
| anjuwks  | float | %9.0g | anjuwks  | annual weeks unemployed: year to sept 1   |
| anjiwks  | float | %9.0g | anjiwks  | annual weeks inactive: year to sept 1     |
| anjbnw   | byte  | %8.0g | anjbnw   | no. different employers: year to sept 1   |
| anjbsp   | byte  | %8.0g | anjbsp   | no. employment spells: year to sept 1     |
| anjusp   | byte  | %8.0g | anjusp   | no. unemployment spells: year to sept 1   |
| anjisp   | byte  | %8.0g | anjisp   | no. inactive spells: year to sept 1       |
| ajbstat1 | byte  | %8.0g | ajbstat1 | employment status on sept 1, year ago     |
| ajbstatt | byte  | %8.0g | ajbstatt | employment status on sept 1, this year    |
| ajbsocly | int   | %8.0g | ajbsocly | occupation (soc): job on sept 1, 1990     |
| ajlseg   | byte  | %8.0g | ajlseg   | socio economic group: last job            |
| ajlgold  | byte  | %8.0g | ajlgold  | goldthorpe social class: last job         |
| ajlrgsc  | byte  | %8.0g | ajlrgsc  | rg social class: last job                 |
| ajlisco  | str4  | %4s   | ajlisco  | international soc: last job               |
| ajlcssm  | float | %9.0g | ajlcssm  | cambridge scale males: last job           |
| ajlcssf  | float | %9.0g | ajlcssf  | cambridge scale females: last job         |
| ajlhgs   | float | %9.0g | ajlhgs   | hope - goldthorpe scale: last job         |
| ajlsec   | int   | %8.0g | ajlsec   | socio-economic class: last job            |
| avote    | byte  | %8.0g | avote    | political party supported                 |
| anorgm   | byte  | %8.0g | anorgm   | number of organisations member of         |
| anorga   | byte  | %8.0g | anorga   | number of organisations active in         |
| afimnp   | float | %9.0g | afimnp   | pension income: last month                |
| afimnb   | float | %9.0g | afimnb   | benefit income: last month                |
| afimni   | float | %9.0g | afimni   | investment income: last month             |
| afimnt   | float | %9.0g | afimnt   | transfer income: last month               |
| afimnln  | float | %9.0g | afimnln  | non-labour income: last month             |

|          |        |        |          |                                          |
|----------|--------|--------|----------|------------------------------------------|
| afimnl   | float  | %9.0g  | afimnl   | labour income: last month                |
| afimn    | float  | %9.0g  | afimn    | total income: last month                 |
| afiyrl   | double | %10.0g | afiyrl   | annual labour income (1.9.90-1.9.91)     |
| afiyrn1  | float  | %9.0g  | afiyrn1  | annual non-labour income (1.9.90-1.9.91) |
| afiyrp   | float  | %9.0g  | afiyrp   | annual pension income (1.9.90-1.9.91)    |
| afiyrb   | float  | %9.0g  | afiyrb   | annual benefit income (1.9.90-1.9.91)    |
| afiyrt   | float  | %9.0g  | afiyrt   | annual transfer income (1.9.90-1.9.91)   |
| afiyri   | float  | %9.0g  | afiyri   | annual investment income (1.9.90-1.9.91) |
| afiy     | double | %10.0g | afiy     | annual income (1.9.90-1.9.91)            |
| afihhmn  | float  | %9.0g  | afihhmn  | household income: month before interview |
| ahlghq1  | byte   | %8.0g  | ahlghq1  | subjective wellbeing (ghq) 1: likert     |
| ahlghq2  | byte   | %8.0g  | ahlghq2  | subjective wellbeing (ghq) 2: caseness   |
| asplib   | byte   | %8.0g  | asplib   | whether spouse/partner employed now      |
| aspsoc   | int    | %8.0g  | aspsoc   | spouse/partner's occupation              |
| asplibhr | byte   | %8.0g  | asplibhr | spouse/partner's weekly work hours       |
| asplibot | byte   | %8.0g  | asplibot | spouse/partner's weekly overtime         |
| asppayg  | float  | %9.0g  | asppayg  | spouse/partner's monthly gross pay       |
| asplibyr | byte   | %8.0g  | asplibyr | whether spse/partner employed last year  |
| ahlprba  | byte   | %8.0g  | ahlprba  | health problems: arms, legs, hands, etc  |
| ahlprbb  | byte   | %8.0g  | ahlprbb  | health problems: sight                   |
| ahlprbc  | byte   | %8.0g  | ahlprbc  | health problems: hearing                 |
| ahlprbd  | byte   | %8.0g  | ahlprbd  | health problems: skin conditions/allergy |
| ahlprbe  | byte   | %8.0g  | ahlprbe  | health problems: chest/breathing         |
| ahlprbf  | byte   | %8.0g  | ahlprbf  | health problems: heart/blood pressure    |
| ahlprbg  | byte   | %8.0g  | ahlprbg  | health problems: stomach or digestion    |
| ahlprbh  | byte   | %8.0g  | ahlprbh  | health problems: diabetes                |
| ahlprbi  | byte   | %8.0g  | ahlprbi  | health problems: anxiety, depression, et |
| ahlprbj  | byte   | %8.0g  | ahlprbj  | health problems: alcohol or drugs        |
| ahlprbk  | byte   | %8.0g  | ahlprbk  | health problems: epilepsy                |
| ahlprbl  | byte   | %8.0g  | ahlprbl  | health problems: migraine                |
| ahlprbm  | byte   | %8.0g  | ahlprbm  | health problems: other                   |
| aj2payi  | byte   | %8.0g  | aj2payi  | imputation flag - aj2pay (base)          |
| afiyrdii | byte   | %8.0g  | afiyrdii | imputation flag - afiyrdi (base)         |
| aprfitbi | byte   | %8.0g  | aprfitbi | imputation flag - aprfitb (base)         |
| apaygui  | byte   | %8.0g  | apaygui  | imputation flag - apaygu (derived)       |
| apaynui  | byte   | %8.0g  | apaynui  | imputation flag - apaynu (derived)       |
| apaygti  | byte   | %8.0g  | apaygti  | imputation flag - apaygt (derived)       |
| apaygli  | byte   | %8.0g  | apaygli  | imputation flag - apaygly (derived)      |
| apaynti  | byte   | %8.0g  | apaynti  | imputation flag - apaynty (derived)      |
| apaynli  | byte   | %8.0g  | apaynli  | imputation flag - apaynly (derived)      |
| ajsprofi | byte   | %8.0g  | ajsprofi | imputation flag - ajsprof (derived)      |
| ajspaygi | byte   | %8.0g  | ajspaygi | imputation flag - ajspayg (derived)      |
| afimnpi  | byte   | %8.0g  | afimnpi  | imputation flag - afimnp (derived)       |
| afimnbi  | byte   | %8.0g  | afimnbi  | imputation flag - afimnb (derived)       |
| afimnii  | byte   | %8.0g  | afimnii  | imputation flag - afimni (derived)       |
| afimnti  | byte   | %8.0g  | afimnti  | imputation flag - afimnt (derived)       |
| afimnnli | byte   | %8.0g  | afimnnli | imputation flag - afimnnl (derived)      |
| afimnli  | byte   | %8.0g  | afimnli  | imputation flag - afimnl (derived)       |
| afimnthi | byte   | %8.0g  | afimnthi | imputation flag - afimn (derived)        |
| afiyarli | byte   | %8.0g  | afiyarli | imputation flag - afiyrl (derived)       |
| afiyrnli | byte   | %8.0g  | afiyrnli | imputation flag - afiyrn1 (derived)      |
| afiyрпи  | byte   | %8.0g  | afiyрпи  | imputation flag - afiyrp (derived)       |
| afiyربي  | byte   | %8.0g  | afiyربي  | imputation flag - afiyrb (derived)       |
| afiyrti  | byte   | %8.0g  | afiyrti  | imputation flag - afiyrt (derived)       |
| afiyrii  | byte   | %8.0g  | afiyrii  | imputation flag - afiyri (derived)       |
| afiyeari | byte   | %8.0g  | afiyeari | imputation flag - afiy (derived)         |
| asppaygi | byte   | %8.0g  | asppaygi | imputation flag - asppayg (derived)      |
| afihhmni | byte   | %8.0g  | afihhmni | imputation flag - afihhmn (derived)      |
| amrjend  | int    | %8.0g  | amrjend  | year left most recent job                |
| amrjsoc  | int    | %8.0g  | amrjsoc  | occupation (soc) of most recent job      |
| amrjsic  | int    | %8.0g  | amrjsic  | industry (sic) of most recent job        |
| amrjsemp | byte   | %8.0g  | amrjsemp | employee or self emp., most recent job   |
| amrjboss | byte   | %8.0g  | amrjboss | hired employees, most recent job         |
| amrjmngr | byte   | %8.0g  | amrjmngr | managerial duties, most recent job       |
| amrjsize | byte   | %8.0g  | amrjsize | number at workplace, most recent job     |
| amrjseg  | byte   | %8.0g  | amrjseg  | socio economic group: most recent job    |
| amrjgold | byte   | %8.0g  | amrjgold | goldthorpe class: most recent job        |
| amrjrgsc | byte   | %8.0g  | amrjrgsc | rg social class: most recent job         |
| amrjisco | str4   | %4s    |          | international soc: most recent job       |
| amrjcsm  | float  | %9.0g  | amrjcsm  | cambridge scale m: most recent job       |
| amrjcsmf | float  | %9.0g  | amrjcsmf | cambridge scale f: most recent job       |
| amrjhgs  | float  | %9.0g  | amrjhgs  | hope-goldthorpe scale: most recent job   |
| amrjsec  | int    | %8.0g  | amrjsec  | socio-economic class: most recent job    |

|          |      |        |          |                                          |
|----------|------|--------|----------|------------------------------------------|
| aplnowy4 | int  | %8.0g  | aplnowy4 | year moved to present address: 4 digit   |
| ayr2uk4  | int  | %8.0g  | ayr2uk4  | year came to britain: 4 digit            |
| ajbbgy4  | int  | %8.0g  | ajbbgy4  | year started current job: 4 digit        |
| ajsprby4 | int  | %8.0g  | ajsprby4 | s/emp: date accounts began: 4 digit year |
| ajsprey4 | int  | %8.0g  | ajsprey4 | s/emp: date accounts ended: 4 digit year |
| ajspyby4 | int  | %8.0g  | ajspyby4 | s/emp: year gross pay began: 4 digit     |
| ajspyey4 | int  | %8.0g  | ajspyey4 | s/emp: year gross pay ended: 4 digit     |
| ajsbgy4  | int  | %8.0g  | ajsbgy4  | s/emp: year started present job: 4 digit |
| acjsbgy4 | int  | %8.0g  | acjsbgy4 | year labour force stat began: 4 digit    |
| ajlend4  | int  | %8.0g  | ajlend4  | year left last job: 4 digit              |
| asppid   | long | %12.0g | asppid   | cross-wave person identifier of spouse   |
| afpid    | long | %12.0g | afpid    | cross-wave person identifier of father   |
| ampid    | long | %12.0g | ampid    | cross-wave person identifier of mother   |
| aregion2 | byte | %8.0g  | aregion2 | government office region                 |
| aisced   | byte | %8.0g  | aisced   | iscled levels                            |
| acasmin  | byte | %8.0g  | acasmin  | casmin levels                            |
| ajbiscon | int  | %8.0g  | ajbiscon | international soc (num): present job     |
| ajliscon | int  | %8.0g  | ajliscon | international soc (num): last job        |
| amrjiscn | int  | %8.0g  | amrjiscn | international soc (num): most recent job |
| amaiscon | int  | %8.0g  | amaiscon | international soc (num): mother's job    |
| apaiscon | int  | %8.0g  | apaiscon | international soc (num): father's job    |

Sorted by:

```
.
. use "$datadir/aindresp", clear
```

```
. describe
```

Contains data from S:\final\aindresp.dta

obs: 10,264

vars: 795

size: 11,044,064

| variable name | storage type | display format | value label | variable label                           |
|---------------|--------------|----------------|-------------|------------------------------------------|
| ahid          | long         | %12.0g         |             | household identification number          |
| apno          | byte         | %8.0g          |             | person number                            |
| adoid         | byte         | %8.0g          | adoid       | date of interview: day                   |
| adoim         | byte         | %8.0g          | adoim       | date of interview: month                 |
| aivsoih       | byte         | %8.0g          | aivsoih     | hour interview began                     |
| aivsoim       | byte         | %8.0g          | aivsoim     | minute interview began                   |
| alknbrd       | byte         | %8.0g          | alknbrd     | likes present neighbourhood              |
| alkmove       | byte         | %8.0g          | alkmove     | prefers to move house                    |
| alkmovy       | byte         | %8.0g          | alkmovy     | prefers to move: main reason             |
| aplever       | byte         | %8.0g          | aplever     | always resident at present address       |
| aplnowm       | byte         | %8.0g          | aplnowm     | month moved to present address           |
| aplnowy       | byte         | %8.0g          | aplnowy     | year moved to present address            |
| aplb4d        | int          | %8.0g          | aplb4d      | district of previous residence           |
| aplb4c        | byte         | %8.0g          | aplb4c      | country of last residence                |
| aplbord       | int          | %8.0g          | aplbord     | district of birth                        |
| aplborc       | byte         | %8.0g          | aplborc     | country of birth                         |
| ayr2uk        | byte         | %8.0g          | ayr2uk      | year came to britain                     |
| adobm         | byte         | %8.0g          | adobm       | month of birth                           |
| adoby         | int          | %8.0g          | adoby       | year of birth                            |
| asex          | byte         | %8.0g          | asex        | sex                                      |
| apaju         | byte         | %8.0g          | apaju       | father not working when resp. aged 14    |
| apasoc        | int          | %8.0g          | apasoc      | father's occupation (soc), resp. aged 14 |
| apasemp       | byte         | %8.0g          | apasemp     | father self employed, resp. aged 14      |
| apaboss       | byte         | %8.0g          | apaboss     | father had employees, resp. aged 14      |
| apamngr       | byte         | %8.0g          | apamngr     | father was manager, resp. aged 14        |
| amaju         | byte         | %8.0g          | amaju       | mother not working when resp. aged 14    |
| amasoc        | int          | %8.0g          | amasoc      | mother's occupation (soc), resp. aged 14 |
| amasemp       | byte         | %8.0g          | amasemp     | mother self employed, resp. aged 14      |
| amaboss       | byte         | %8.0g          | amaboss     | mother had employees, resp. aged 14      |
| amamngr       | byte         | %8.0g          | amamngr     | mother was manager, resp. aged 14        |
| amlstat       | byte         | %8.0g          | amlstat     | present legal marital status             |
| aschool       | byte         | %8.0g          | aschool     | never went to /still at school           |
| ascend        | byte         | %8.0g          | ascend      | school leaving age                       |
| asctype       | byte         | %8.0g          | asctype     | type of school attended                  |

|         |      |       |         |                                          |
|---------|------|-------|---------|------------------------------------------|
| ascnow  | byte | %8.0g | ascnow  | still at school                          |
| afetype | byte | %8.0g | afetype | type of further education attended       |
| afenow  | byte | %8.0g | afenow  | still in further education               |
| afeend  | byte | %8.0g | afeend  | further education leaving age            |
| aqfhas  | byte | %8.0g | aqfhas  | has listed post school qualification     |
| aqfa    | byte | %8.0g | aqfa    | qualifications: youth training cert      |
| aqfb    | byte | %8.0g | aqfb    | qualifications: trade apprenticeship     |
| aqfc    | byte | %8.0g | aqfc    | qualifications: clerical or commercial   |
| aqfd    | byte | %8.0g | aqfd    | qualifications: city and guilds pt i     |
| aqfe    | byte | %8.0g | aqfe    | qualifications: city and guilds pt ii    |
| aqff    | byte | %8.0g | aqff    | qualifications: city and guilds pt iii   |
| aqfg    | byte | %8.0g | aqfg    | qualifications: onc ond bec gen cert     |
| aqfh    | byte | %8.0g | aqfh    | qualifications: hnc hnd bec higher cert  |
| aqfi    | byte | %8.0g | aqfi    | qualifications: nursing sen srn scm      |
| aqfj    | byte | %8.0g | aqfj    | qualifications: teaching                 |
| aqfk    | byte | %8.0g | aqfk    | qualifications: university diploma       |
| aqfl    | byte | %8.0g | aqfl    | qualifications: univ/cnaa first degree   |
| aqfm    | byte | %8.0g | aqfm    | qualifications: univ/cnaa higher degree  |
| aqfn    | byte | %8.0g | aqfn    | post school qualifications: other        |
| aqfed   | byte | %8.0g | aqfed   | has listed school qualification          |
| aqfedb  | byte | %8.0g | aqfedb  | qualifications: any cses grade 2-5       |
| anqfedb | byte | %8.0g | anqfedb | qualifications: no. cses grade 2-5       |
| aqfedc  | byte | %8.0g | aqfedc  | qualifications: any cses grade 1         |
| anqfedc | byte | %8.0g | anqfedc | qualifications: no. cses grade 1         |
| aqfedd  | byte | %8.0g | aqfedd  | qualifications: any gcse grade d-g       |
| anqfedd | byte | %8.0g | anqfedd | qualifications: no. gcse grade d-g       |
| aqfede  | byte | %8.0g | aqfede  | qualifications: any gcse grade a-c       |
| anqfede | byte | %8.0g | anqfede | qualifications: no. gcse grade a-c       |
| aqfedf  | byte | %8.0g | aqfedf  | qualifications: any o levels pre-1975    |
| anqfedf | byte | %8.0g | anqfedf | qualifications: no. o levels pre-1975    |
| aqfedg  | byte | %8.0g | aqfedg  | qualifications: any ols a-c post-1975    |
| anqfedg | byte | %8.0g | anqfedg | qualifications: no. ols a-c post-1975    |
| aqfedh  | byte | %8.0g | aqfedh  | qualifications: any ols d-e post-1975    |
| anqfedh | byte | %8.0g | anqfedh | qualifications: no. ols d-e post-1975    |
| aqfedi  | byte | %8.0g | aqfedi  | qualifications: any higher school certs  |
| anqfedi | byte | %8.0g | anqfedi | qualifications: no. higher school certs  |
| aqfedj  | byte | %8.0g | aqfedj  | qualifications: any a levels             |
| anqfedj | byte | %8.0g | anqfedj | qualifications: no. a level passes       |
| aqfeda  | byte | %8.0g | aqfeda  | qualifications: any school cert/ matric  |
| anqfeda | byte | %8.0g | anqfeda | qualifications: no. school cert/ matric  |
| aqfedk  | byte | %8.0g | aqfedk  | qualifications: any scs grade d-e or 4-5 |
| anqfedk | byte | %8.0g | anqfedk | qualifications: no. scs grade d-e or 4-5 |
| aqfedl  | byte | %8.0g | aqfedl  | qualifications: any o grades a-c or 1-3  |
| anqfedl | byte | %8.0g | anqfedl | qualifications: no. o grades a-c or 1-3  |
| aqfedm  | byte | %8.0g | aqfedm  | qualifications: any standard grades 4-7  |
| anqfedm | byte | %8.0g | anqfedm | qualifications: no. standard grades 4-7  |
| aqfedn  | byte | %8.0g | aqfedn  | qualifications: any standard grades 1-3  |
| anqfedn | byte | %8.0g | anqfedn | qualifications: no. standard grades 1-3  |
| aqfedo  | byte | %8.0g | aqfedo  | qualifications: any higher grades        |
| anqfedo | byte | %8.0g | anqfedo | qualifications: no. higher grade passes  |
| aqfedp  | byte | %8.0g | aqfedp  | qualifications: any 6th year certs       |
| anqfedp | byte | %8.0g | anqfedp | qualifications: no. 6th year certs       |
| aqfedq  | byte | %8.0g | aqfedq  | qualifications: any slcs lower grade     |
| anqfedq | byte | %8.0g | anqfedq | qualifications: no. slc lower grades     |
| aqfedr  | byte | %8.0g | aqfedr  | qualifications: any slcs higher grade    |
| anqfedr | byte | %8.0g | anqfedr | qualifications: no. slcs higher grade    |
| aqfeds  | byte | %8.0g | aqfeds  | qualifications: any others               |
| anqfeds | byte | %8.0g | anqfeds | qualifications: no. of others            |
| aeaage  | byte | %8.0g | aeaage  | whether working age                      |
| aednew  | byte | %8.0g | aednew  | any training/education since 1.9.90      |
| aednew1 | byte | %8.0g | aednew1 | job training: to develop general skills  |
| aednew2 | byte | %8.0g | aednew2 | job training: to prepare for future job  |
| aednew3 | byte | %8.0g | aednew3 | job training: to increase skills         |
| aednew4 | byte | %8.0g | aednew4 | job training: to improve skills          |
| aednewd | int  | %8.0g | aednewd | no. of days training/educ since 1.9.90   |
| apaperr | byte | %8.0g | apaperr | newspapers: normally reads a daily       |
| apaper1 | byte | %8.0g | apaper1 | newspapers: 1st one mentioned            |
| apaper2 | byte | %8.0g | apaper2 | newspapers: 2nd one mentioned            |
| apaperm | byte | %8.0g | apaperm | newspaper most frequently read           |
| apaperp | byte | %8.0g | apaperp | own newspapers politics                  |
| aivda   | byte | %8.0g | aivda   | ic: demog section respondent alone       |
| aivdb   | byte | %8.0g | aivdb   | ic: demog section partner present        |
| aivdc   | byte | %8.0g | aivdc   | ic: demog section other adults present   |

|          |      |       |          |                                          |
|----------|------|-------|----------|------------------------------------------|
| aivdd    | byte | %8.0g | aivdd    | ic: demog section children present       |
| ahlstat  | byte | %8.0g | ahlstat  | health over last 12 months               |
| ahlzest  | byte | %8.0g | ahlzest  | energy compared with people of same age  |
| ahldsbl  | byte | %8.0g | ahldsbl  | registered disabled                      |
| ahlprb   | byte | %8.0g | ahlprb   | health problems: none                    |
| ahlprb1  | byte | %8.0g | ahlprb1  | health problems: 1st mention             |
| ahlprb2  | byte | %8.0g | ahlprb2  | health problems: 2nd mention             |
| ahlprb3  | byte | %8.0g | ahlprb3  | health problems: 3rd mention             |
| ahlprb4  | byte | %8.0g | ahlprb4  | health problems: 4th mention             |
| ahllt    | byte | %8.0g | ahllt    | health limits daily activities           |
| ahllta   | byte | %8.0g | ahllta   | health hinders doing the housework       |
| ahlltb   | byte | %8.0g | ahlltb   | health hinders climbing the stairs       |
| ahlltc   | byte | %8.0g | ahlltc   | health hinders getting dressed           |
| ahlltd   | byte | %8.0g | ahlltd   | health hinders walking more than 10 mins |
| ahllte   | byte | %8.0g | ahllte   | health no hindrance to listed activities |
| ahlltw   | byte | %8.0g | ahlltw   | health limits type or amount of work     |
| ahlendw  | byte | %8.0g | ahlendw  | health prohibits some types of work      |
| ahlltwa  | byte | %8.0g | ahlltwa  | how far health limits amount of work     |
| ahl2gp   | byte | %8.0g | ahl2gp   | number of visits to gp since 1.9.90      |
| axdts    | byte | %8.0g | axdts    | whether accident since 1.9.90            |
| anxdts   | byte | %8.0g | anxdts   | no. of serious accidents since 1.9.90    |
| axdt1m   | byte | %8.0g | axdt1m   | month of first accident                  |
| axdt1y   | byte | %8.0g | axdt1y   | year of first accident                   |
| axdt2m   | byte | %8.0g | axdt2m   | month of second accident                 |
| axdt2y   | byte | %8.0g | axdt2y   | year of second accident                  |
| axdt3m   | byte | %8.0g | axdt3m   | month of third accident                  |
| axdt3y   | byte | %8.0g | axdt3y   | year of third accident                   |
| axdt1pl  | byte | %8.0g | axdt1pl  | location of first accident               |
| axdt2pl  | byte | %8.0g | axdt2pl  | location of second accident              |
| axdt3pl  | byte | %8.0g | axdt3pl  | location of third accident               |
| ahosp    | byte | %8.0g | ahosp    | hospital in-patient since 1.9.90         |
| ahospd   | int  | %8.0g | ahospd   | hospital in-patient: days since 1.9.90   |
| ahospch  | byte | %8.0g | ahospch  | hospital stays were for childbirth       |
| ahospnhs | byte | %8.0g | ahospnhs | hospital stays nhs or private            |
| ahlsv    | byte | %8.0g | ahlsv    | health service: used any since 1.9.90    |
| ahlsva   | byte | %8.0g | ahlsva   | health service: used health visitor      |
| ahlsvan  | byte | %8.0g | ahlsvan  | health service: health visitor nhs/priv  |
| ahlsvaf  | byte | %8.0g | ahlsvaf  | health service: health visitor free/paid |
| ahlsvb   | byte | %8.0g | ahlsvb   | welfare service: used home help          |
| ahlsvbn  | byte | %8.0g | ahlsvbn  | welfare service: home help nhs/private   |
| ahlsvbf  | byte | %8.0g | ahlsvbf  | welfare service: home help free/paid     |
| ahlsvc   | byte | %8.0g | ahlsvc   | welfare service: used meals on wheels    |
| ahlsvcn  | byte | %8.0g | ahlsvcn  | welfare service:meals on wheels nhs/priv |
| ahlsvcf  | byte | %8.0g | ahlsvcf  | welfare service:meals on wheels free/pd  |
| ahlsvd   | byte | %8.0g | ahlsvd   | welfare service: used social worker      |
| ahlsvdn  | byte | %8.0g | ahlsvdn  | welfare service: social worker nhs/priv  |
| ahlsvdf  | byte | %8.0g | ahlsvdf  | welfare service: social worker free/paid |
| ahlsve   | byte | %8.0g | ahlsve   | health service: used chiropodist         |
| ahlsven  | byte | %8.0g | ahlsven  | health service: chiropodist nhs/private  |
| ahlsvef  | byte | %8.0g | ahlsvef  | health service: chiropodist free/paid    |
| ahlsvf   | byte | %8.0g | ahlsvf   | health service:used alternative medicine |
| ahlsvfn  | byte | %8.0g | ahlsvfn  | health service:alt. medicine nhs/private |
| ahlsvff  | byte | %8.0g | ahlsvff  | health service: alt. medicine free/paid  |
| ahlsvg   | byte | %8.0g | ahlsvg   | welfare service: used psychotherapist    |
| ahlsvgn  | byte | %8.0g | ahlsvgn  | welfare service: psychotherapy nhs/priv  |
| ahlsvgf  | byte | %8.0g | ahlsvgf  | welfare service: psychotherapy free/paid |
| ahlsvh   | byte | %8.0g | ahlsvh   | welfare service: used speech therapist   |
| ahlsvhn  | byte | %8.0g | ahlsvhn  | welfare service: speech therapy nhs/priv |
| ahlsvhf  | byte | %8.0g | ahlsvhf  | welfare service:speech therapy free/paid |
| ahlsvi   | byte | %8.0g | ahlsvi   | health service: used physiotherapist     |
| ahlsvin  | byte | %8.0g | ahlsvin  | health service: physiotherapy nhs/priv   |
| ahlsvif  | byte | %8.0g | ahlsvif  | health service: physiotherapy free/paid  |
| ahlsvj   | byte | %8.0g | ahlsvj   | welfare service: used other service (i)  |
| ahlsvjn  | byte | %8.0g | ahlsvjn  | welfare service: other serv (i) nhs/priv |
| ahlsvjf  | byte | %8.0g | ahlsvjf  | welfare service:other serv (i) free/paid |
| ahlsvk   | byte | %8.0g | ahlsvk   | welfare service: used other service (ii) |
| ahlsvkn  | byte | %8.0g | ahlsvkn  | welfare service:other serv (ii) nhs/priv |
| ahlsvkf  | byte | %8.0g | ahlsvkf  | welfare service:other serv(ii) free/paid |
| ahlcka   | byte | %8.0g | ahlcka   | health check-up: dental                  |
| ahlckan  | byte | %8.0g | ahlckan  | health check-up: dental nhs/private      |
| ahlckb   | byte | %8.0g | ahlckb   | health check-up: eyetest                 |
| ahlckbn  | byte | %8.0g | ahlckbn  | health check-up: eyetest nhs/private     |
| ahlckc   | byte | %8.0g | ahlckc   | health check-up: chest or other x-ray    |

|          |      |       |          |                                           |
|----------|------|-------|----------|-------------------------------------------|
| ahlckcn  | byte | %8.0g | ahlckcn  | health check-up: chest x-ray nhs/private  |
| ahlckd   | byte | %8.0g | ahlckd   | health check-up: blood pressure           |
| ahlckdn  | byte | %8.0g | ahlckdn  | health check-up: blood pressure nhs/priv  |
| ahlcke   | byte | %8.0g | ahlcke   | health check-up: cholesterol test         |
| ahlcken  | byte | %8.0g | ahlcken  | health check-up: cholesterol nhs/private  |
| ahlckf   | byte | %8.0g | ahlckf   | health check-up: other checks             |
| ahlckfn  | byte | %8.0g | ahlckfn  | health check-up: other checks nhs/private |
| ahlckg   | byte | %8.0g | ahlckg   | health check-up: cervical smear           |
| ahlckgn  | byte | %8.0g | ahlckgn  | health check-up: cervical smear nhs/priv  |
| ahlckh   | byte | %8.0g | ahlckh   | health check-up: breast screen            |
| ahlckhn  | byte | %8.0g | ahlckhn  | health check-up: breast screen nhs/priv   |
| asmoker  | byte | %8.0g | asmoker  | smoker                                    |
| ancigs   | byte | %8.0g | ancigs   | number of cigarettes smoked               |
| aophla   | byte | %8.0g | aophla   | all health care should be free            |
| aophlb   | byte | %8.0g | aophlb   | compulsory private insurance if can pay   |
| aophlc   | byte | %8.0g | aophlc   | unfair that wealth buys medical priority  |
| arachl6  | byte | %8.0g | arachl6  | responsible for dependent child under 16  |
| ahlch    | byte | %8.0g | ahlch    | resps child/ren have health problems      |
| ahlchl   | byte | %8.0g | ahlchl   | pno of 1st child with health problems     |
| ahlch2   | byte | %8.0g | ahlch2   | pno of 2nd child with health problems     |
| ahlch3   | byte | %8.0g | ahlch3   | pno of 3rd child with health problems     |
| ahlch4   | byte | %8.0g | ahlch4   | pno of 4th child with health problems     |
| aaidhh   | byte | %8.0g | aaidhh   | cares for handicapped/other in household  |
| aaidhua  | byte | %8.0g | aaidhua  | pno of 1st cared for person               |
| aaidhub  | byte | %8.0g | aaidhub  | pno of 2nd cared for person               |
| aaidhuc  | byte | %8.0g | aaidhuc  | pno of 3rd cared for person               |
| aaidxhh  | byte | %8.0g | aaidxhh  | provides care for non-resident person     |
| anaidxhh | byte | %8.0g | anaidxhh | number of non-residents cared for         |
| aaidhu1  | byte | %8.0g | aaidhu1  | caring:relation to 1st non-res dependant  |
| aaidhu2  | byte | %8.0g | aaidhu2  | caring:relation to 2nd non-res dependant  |
| aaidpl1  | byte | %8.0g | aaidpl1  | 1st non-res dependant in institution      |
| aaidpl2  | byte | %8.0g | aaidpl2  | 2nd non-res dependant in institution      |
| aaidhrs  | byte | %8.0g | aaidhrs  | hours per week spent caring               |
| aivma    | byte | %8.0g | aivma    | health section: respondent alone          |
| aivmb    | byte | %8.0g | aivmb    | health section: partner present           |
| aivmc    | byte | %8.0g | aivmc    | health section: other adults present      |
| aivmd    | byte | %8.0g | aivmd    | health section: child/ren present         |
| ajbhas   | byte | %8.0g | ajbhas   | did paid work last week                   |
| ajboff   | byte | %8.0g | ajboff   | no work last week but has job             |
| ajboffy  | byte | %8.0g | ajboffy  | reason off work last week                 |
| ajbterm  | byte | %8.0g | ajbterm  | current job: permanent or temporary       |
| ajbsoc   | int  | %8.0g | ajbsoc   | occupation (soc): current main job        |
| ajbsic   | int  | %8.0g | ajbsic   | industry (sic) of employer: current job   |
| ajbsemp  | byte | %8.0g | ajbsemp  | employee or self-employed: current job    |
| ajbmng   | byte | %8.0g | ajbmng   | managerial duties: current job            |
| ajbsect  | byte | %8.0g | ajbsect  | employing organisation: current job       |
| ajbsize  | byte | %8.0g | ajbsize  | number employed at workplace: current jo  |
| ajbmix   | byte | %8.0g | ajbmix   | sex segregation: current job              |
| ajbhrs   | byte | %8.0g | ajbhrs   | no. of hours normally worked per week     |
| ajbot    | byte | %8.0g | ajbot    | no. of overtime hours in normal week      |
| ajbotpd  | byte | %8.0g | ajbotpd  | no. of hours worked as paid overtime      |
| ajbhrlk  | byte | %8.0g | ajbhrlk  | preference over hours worked              |
| ajbtime  | byte | %8.0g | ajbtime  | times of day usually work                 |
| ajbonus  | byte | %8.0g | ajbonus  | pay includes bonuses or profit share      |
| ajbrise  | byte | %8.0g | ajbrise  | pay includes annual increments            |
| atujbpl  | byte | %8.0g | atujbpl  | union or staff association at workplace   |
| atuin1   | byte | %8.0g | atuin1   | member of workplace union                 |
| atuin2   | byte | %8.0g | atuin2   | member of any trade union or similar      |
| ajbopps  | byte | %8.0g | ajbopps  | promotion opportunities in current job    |
| ajbed    | byte | %8.0g | ajbed    | had work related training since 1.9.90    |
| ajbed1   | byte | %8.0g | ajbed1   | training: induction for current job       |
| ajbed2   | byte | %8.0g | ajbed2   | training:increase skills for current job  |
| ajbed3   | byte | %8.0g | ajbed3   | training: improve skills for current job  |
| ajbed4   | byte | %8.0g | ajbed4   | training: preparation for future jobs     |
| ajbed5   | byte | %8.0g | ajbed5   | training: to develop skills generally     |
| ajbedd   | int  | %8.0g | ajbedd   | training: days spent since 1.9.90         |
| ajbpen   | byte | %8.0g | ajbpen   | pension: employer runs a pension scheme   |
| ajbpenm  | byte | %8.0g | ajbpenm  | pension: member of employers scheme       |
| ajbpl    | byte | %8.0g | ajbpl    | work location                             |
| ajbttwt  | int  | %8.0g | ajbttwt  | minutes spent travelling to work          |
| ajbttwm  | byte | %8.0g | ajbttwm  | main means of travel to work              |
| ajbsat1  | byte | %8.0g | ajbsat1  | job satisfaction: promotion prospects     |
| ajbsat2  | byte | %8.0g | ajbsat2  | job satisfaction: total pay               |

|         |       |        |         |                                           |
|---------|-------|--------|---------|-------------------------------------------|
| ajbsat3 | byte  | %8.0g  | ajbsat3 | job satisfaction: relations with boss     |
| ajbsat4 | byte  | %8.0g  | ajbsat4 | job satisfaction: security                |
| ajbsat5 | byte  | %8.0g  | ajbsat5 | job satisfaction: use of initiative       |
| ajbsat6 | byte  | %8.0g  | ajbsat6 | job satisfaction: work itself             |
| ajbsat7 | byte  | %8.0g  | ajbsat7 | job satisfaction: hours worked            |
| ajbsat  | byte  | %8.0g  | ajbsat  | job satisfaction: overall                 |
| apaygl  | long  | %12.0g | apaygl  | gross pay at last payment                 |
| apaygw  | float | %9.0g  | apaygw  | pay period (weeks): last gross pay        |
| apaynl  | long  | %12.0g | apaynl  | take-home pay at last payment             |
| apaynw  | float | %9.0g  | apaynw  | pay period (weeks): last take-home pay    |
| apayslp | byte  | %8.0g  | apayslp | pay slip seen by interviewer              |
| apayusl | byte  | %8.0g  | apayusl | was last gross pay the usual amount       |
| apayu   | int   | %8.0g  | apayu   | usual pay                                 |
| apayuw  | float | %9.0g  | apayuw  | usual pay: pay period (weeks)             |
| apayug  | byte  | %8.0g  | apayug  | usual pay: gross/net of deductions        |
| apaydf1 | byte  | %8.0g  | apaydf1 | last pay unusual: included back pay       |
| apaydf2 | byte  | %8.0g  | apaydf2 | last pay unusual: included holiday pay    |
| apaydf3 | byte  | %8.0g  | apaydf3 | last pay unusual: included tax refund     |
| apaydf4 | byte  | %8.0g  | apaydf4 | last pay unusual: included sick pay       |
| apaydf5 | byte  | %8.0g  | apaydf5 | last pay unusual: sick without pay        |
| apaydf6 | byte  | %8.0g  | apaydf6 | last pay unusual: included maternity pay  |
| apaydf7 | byte  | %8.0g  | apaydf7 | last pay unusual through overtime         |
| apaydf8 | byte  | %8.0g  | apaydf8 | last pay unusual for other reason         |
| ajbbgd  | byte  | %8.0g  | ajbbgd  | day started current job                   |
| ajbbgm  | byte  | %8.0g  | ajbbgm  | month started current job                 |
| ajbbgy  | byte  | %8.0g  | ajbbgy  | year started current job                  |
| ajbbgly | byte  | %8.0g  | ajbbgly | started job after 1.9.90                  |
| apayly  | long  | %12.0g | apayly  | usual pay at 1.9.90                       |
| apaylyw | float | %9.0g  | apaylyw | usual pay at 1.9.90: pay period (weeks)   |
| apaylyg | byte  | %8.0g  | apaylyg | usual pay at 1.9.90: gross/net deductions |
| ajbhrly | byte  | %8.0g  | ajbhrly | usual total hours per week at 1.9.90      |
| ajbotly | byte  | %8.0g  | ajbotly | usual hours of paid overtime at 1.9.90    |
| apays   | long  | %12.0g | apays   | starting pay, job start after 1.9.90      |
| apaysw  | float | %9.0g  | apaysw  | starting pay period (weeks): current job  |
| apaysg  | byte  | %8.0g  | apaysg  | starting pay gross or net: current job    |
| ajbhrbg | byte  | %8.0g  | ajbhrbg | starting hours per week: current job      |
| ajbotbg | byte  | %8.0g  | ajbotbg | starting hours paid o/time: current job   |
| apaygyr | long  | %12.0g | apaygyr | total gross earnings in last 12 months    |
| apaygya | byte  | %8.0g  | apaygya | accuracy of total gross earnings          |
| ajsboss | byte  | %8.0g  | ajsboss | s/emp: hires employees                    |
| ajssize | byte  | %8.0g  | ajssize | s/emp: number of employees                |
| ajshrs  | byte  | %8.0g  | ajshrs  | s/emp: hours normally worked per week     |
| ajshrlk | byte  | %8.0g  | ajshrlk | s/emp: preference over hours worked       |
| ajstime | byte  | %8.0g  | ajstime | s/emp: times of day usually work          |
| ajstype | byte  | %8.0g  | ajstype | s/emp: nature of employment               |
| ajsaccs | byte  | %8.0g  | ajsaccs | s/emp: draws up profit/loss accounts      |
| ajsprf  | long  | %12.0g | ajsprf  | s/emp: net profit in last yearly account  |
| ajsprbm | byte  | %8.0g  | ajsprbm | s/emp: date accounts began: month         |
| ajsprby | byte  | %8.0g  | ajsprby | s/emp: date accounts began: year          |
| ajsprem | byte  | %8.0g  | ajsprem | s/emp: date accounts ended: month         |
| ajsprey | byte  | %8.0g  | ajsprey | s/emp: date accounts ended: year          |
| ajspayl | long  | %12.0g | ajspayl | s/emp: last gross earnings                |
| ajspybm | byte  | %8.0g  | ajspybm | s/emp: month gross pay accounts began     |
| ajspyby | byte  | %8.0g  | ajspyby | s/emp: year gross pay accounts began      |
| ajspyem | byte  | %8.0g  | ajspyem | s/emp: month gross pay accounts ended     |
| ajspyey | byte  | %8.0g  | ajspyey | s/emp: year gross pay accounts ended      |
| ajspl   | byte  | %8.0g  | ajspl   | s/emp: work location                      |
| ajsttw  | int   | %8.0g  | ajsttw  | s/emp: minutes spent travelling to work   |
| ajsttwm | byte  | %8.0g  | ajsttwm | s/emp: main means of travel to work       |
| ajssat1 | byte  | %8.0g  | ajssat1 | s/emp: job satisfaction: total pay        |
| ajssat2 | byte  | %8.0g  | ajssat2 | s/emp: job satisfaction: job security     |
| ajssat3 | byte  | %8.0g  | ajssat3 | s/emp: job satisfaction: initiative       |
| ajssat4 | byte  | %8.0g  | ajssat4 | s/emp: job satisfaction: work itself      |
| ajssat5 | byte  | %8.0g  | ajssat5 | s/emp: job satisfaction: hours worked     |
| ajssat  | byte  | %8.0g  | ajssat  | s/emp: job satisfaction: overall          |
| ajsbgd  | byte  | %8.0g  | ajsbgd  | s/emp: day started present job            |
| ajsbgm  | byte  | %8.0g  | ajsbgm  | s/emp: month started present job          |
| ajsbgy  | byte  | %8.0g  | ajsbgy  | s/emp: year started present job           |
| arachl2 | byte  | %8.0g  | arachl2 | responsible for dependent child under 12  |
| ajbchc1 | byte  | %8.0g  | ajbchc1 | childcare: 1st mention                    |
| ajbchc2 | byte  | %8.0g  | ajbchc2 | childcare: 2nd mention                    |
| ajbchc3 | byte  | %8.0g  | ajbchc3 | childcare: 3rd mention                    |
| axpchcf | byte  | %8.0g  | axpchcf | childcare: free or paid for               |



|          |      |       |          |                                          |
|----------|------|-------|----------|------------------------------------------|
| axpchc   | int  | %8.0g | axpchc   | childcare: weekly cost                   |
| ahuxpch  | byte | %8.0g | ahuxpch  | who pays for childcare                   |
| ahunurs  | byte | %8.0g | ahunurs  | who cares for ill children               |
| ajulk1   | byte | %8.0g | ajulk1   | looked for work in last 7 days           |
| ajulk4   | byte | %8.0g | ajulk4   | looked for work in last 4 weeks          |
| ajulkjb  | byte | %8.0g | ajulkjb  | would like a regular paid job            |
| ajuspec  | byte | %8.0g | ajuspec  | looking for /would like a particular job |
| ajusoc   | int  | %8.0g | ajusoc   | occupation (soc) of job sought           |
| ajupayx  | int  | %8.0g | ajupayx  | expected weekly net pay: jobseeker       |
| ajuhrsx  | byte | %8.0g | ajuhrsx  | expected work hours: jobseeker           |
| ajupayl  | int  | %8.0g | ajupayl  | lowest net pay considered: jobseeker     |
| ajuhrs1  | byte | %8.0g | ajuhrs1  | expected hours for lowest pay jobseeker  |
| ajbaspl  | byte | %8.0g | ajbaspl  | most important aspect of a job           |
| ajbaspl2 | byte | %8.0g | ajbaspl2 | second most important aspect of a job    |
| ajblky1  | byte | %8.0g | ajblky1  | most important reason for working        |
| ajblky2  | byte | %8.0g | ajblky2  | second most important reason for working |
| ajbub    | byte | %8.0g | ajbub    | currently signed on at ub office         |
| ajbuby   | byte | %8.0g | ajbuby   | reason why signed on at ub office        |
| aj2has   | byte | %8.0g | aj2has   | has a second paid job                    |
| aj2soc   | int  | %8.0g | aj2soc   | occupation (soc), second job             |
| aj2semp  | byte | %8.0g | aj2semp  | employee or self employed, second job    |
| aj2hrs   | byte | %8.0g | aj2hrs   | no. of hours worked per month, 2nd job   |
| aj2pay   | int  | %8.0g | aj2pay   | gross earnings from 2nd jobs last month  |
| ajbhha   | byte | %8.0g | ajbhha   | family commitments prevented job search  |
| ajbhbb   | byte | %8.0g | ajbhbb   | family commitments prevented taking job  |
| ajbhbc   | byte | %8.0g | ajbhbc   | family commitments prevented job change  |
| ajbhhd   | byte | %8.0g | ajbhhd   | family commitments required job change   |
| ajbhhe   | byte | %8.0g | ajbhhe   | family commitments required leaving job  |
| ajbhbf   | byte | %8.0g | ajbhbf   | family commitments led to less work hrs  |
| ajbhh    | byte | %8.0g | ajbhh    | responsibilities which affected work     |
| aivea    | byte | %8.0g | aivea    | employment section: respondent alone     |
| aiveb    | byte | %8.0g | aiveb    | employment section: partner present      |
| aivec    | byte | %8.0g | aivec    | employment section: other adult present  |
| aived    | byte | %8.0g | aived    | employment section: child present        |
| ajbstat  | byte | %8.0g | ajbstat  | current labour force status              |
| acjsbgd  | byte | %8.0g | acjsbgd  | day current labour force status began    |
| acjsbgm  | byte | %8.0g | acjsbgm  | month current labour force status began  |
| acjsbgy  | byte | %8.0g | acjsbgy  | year current labour force status began   |
| acjsbly  | byte | %8.0g | acjsbly  | ic:current l.f. spell began after 1.9.90 |
| anjbs    | byte | %8.0g | anjbs    | number of periods of paid employment     |
| ajbhad   | byte | %8.0g | ajbhad   | ever had paid employment                 |
| ajlend   | byte | %8.0g | ajlend   | year left last job                       |
| ajlsoc   | int  | %8.0g | ajlsoc   | occupation (soc) of last job             |
| ajlsic   | int  | %8.0g | ajlsic   | industry (sic) of last job               |
| ajlsemp  | byte | %8.0g | ajlsemp  | employee or self employed, last job      |
| ajlboss  | byte | %8.0g | ajlboss  | hired employees, last job                |
| ajlmngr  | byte | %8.0g | ajlmngr  | managerial duties, last job              |
| ajlsize  | byte | %8.0g | ajlsize  | number employed at workplace, last job   |
| aivja    | byte | %8.0g | aivja    | job hist section: respondent alone       |
| aivjb    | byte | %8.0g | aivjb    | job hist section: partner present        |
| aivjc    | byte | %8.0g | aivjc    | job hist section: other adults present   |
| aivjd    | byte | %8.0g | aivjd    | job hist section: child/ren present      |
| aopsoca  | byte | %8.0g | aopsoca  | ordinary people share nations wealth     |
| aopsocb  | byte | %8.0g | aopsocb  | one law for rich and one for poor        |
| aopsocc  | byte | %8.0g | aopsocc  | private enterprise solves economic probs |
| aopsocd  | byte | %8.0g | aopsocd  | public services ought to be state owned  |
| aopsoce  | byte | %8.0g | aopsoce  | govt. has obligation to provide jobs     |
| aopsocf  | byte | %8.0g | aopsocf  | strong trade unions protect employees    |
| aopcls1  | byte | %8.0g | aopcls1  | see self as belonging to a social class  |
| aopcls2  | byte | %8.0g | aopcls2  | subjective social class membership       |
| aopcls3  | byte | %8.0g | aopcls3  | social class affects opportunities       |
| avotel   | byte | %8.0g | avotel   | supports a particular political party    |
| avote2   | byte | %8.0g | avote2   | closer to one political party than other |
| avote3   | byte | %8.0g | avote3   | party which would vote for tomorrow      |
| avote4   | byte | %8.0g | avote4   | which political party closest to         |
| avote5   | byte | %8.0g | avote5   | strength of support for stated party     |
| avote6   | byte | %8.0g | avote6   | level of interest in politics            |
| aoprlg1  | byte | %8.0g | aoprlg1  | religion                                 |
| aoprlg2  | byte | %8.0g | aoprlg2  | attendance at religious services         |
| aoprlg3  | byte | %8.0g | aoprlg3  | religion makes a difference to life      |
| arace    | byte | %8.0g | arace    | ethnic group membership                  |
| aorgm    | byte | %8.0g | aorgm    | member of one of listed organisations    |
| aorgma   | byte | %8.0g | aorgma   | member of political party                |

|         |      |       |         |                                          |
|---------|------|-------|---------|------------------------------------------|
| aorgaa  | byte | %8.0g | aorgaa  | active in political party                |
| aorgmb  | byte | %8.0g | aorgmb  | member of trade union                    |
| aorgab  | byte | %8.0g | aorgab  | active in trade union                    |
| aorgmc  | byte | %8.0g | aorgmc  | member of environmental group            |
| aorgac  | byte | %8.0g | aorgac  | active in environmental group            |
| aorgmd  | byte | %8.0g | aorgmd  | member of parents association            |
| aorgad  | byte | %8.0g | aorgad  | active in parents association            |
| aorgme  | byte | %8.0g | aorgme  | member of tenants or residents group     |
| aorgae  | byte | %8.0g | aorgae  | active in tenants group                  |
| aorgmf  | byte | %8.0g | aorgmf  | member of religious group                |
| aorgaf  | byte | %8.0g | aorgaf  | active in religious group                |
| aorgmg  | byte | %8.0g | aorgmg  | member of voluntary service group        |
| aorgag  | byte | %8.0g | aorgag  | active in voluntary group                |
| aorgmh  | byte | %8.0g | aorgmh  | member of other community group          |
| aorgah  | byte | %8.0g | aorgah  | active in other community group          |
| aorgmi  | byte | %8.0g | aorgmi  | member of social group                   |
| aorgai  | byte | %8.0g | aorgai  | active in social group                   |
| aorgmj  | byte | %8.0g | aorgmj  | member of sports club                    |
| aorgaj  | byte | %8.0g | aorgaj  | active in sports club                    |
| aorgmk  | byte | %8.0g | aorgmk  | member of womens institute               |
| aorgak  | byte | %8.0g | aorgak  | active in womens institute               |
| aorgml  | byte | %8.0g | aorgml  | member of womens group                   |
| aorgal  | byte | %8.0g | aorgal  | active in womens group                   |
| aorgmm  | byte | %8.0g | aorgmm  | member of other organisation             |
| aorgam  | byte | %8.0g | aorgam  | active in other organisation             |
| aorga   | byte | %8.0g | aorga   | active in any of listed organisations    |
| aoppol1 | byte | %8.0g | aoppol1 | most important political issue           |
| aoppol2 | byte | %8.0g | aoppol2 | second most important political issue    |
| aoppol3 | byte | %8.0g | aoppol3 | priority: low inflation/low unemployment |
| aoppol4 | byte | %8.0g | aoppol4 | priority: living standards/environment   |
| aivva   | byte | %8.0g | aivva   | values section: respondent alone         |
| aivvb   | byte | %8.0g | aivvb   | values section: partner present          |
| aivvc   | byte | %8.0g | aivvc   | values section: other adults present     |
| aivvd   | byte | %8.0g | aivvd   | values section: child/ren present        |
| af101   | byte | %8.0g | af101   | income: ni retirement pension            |
| af102   | byte | %8.0g | af102   | income: pension from previous employer   |
| af103   | byte | %8.0g | af103   | income: pension from spouses ex-employer |
| af104   | byte | %8.0g | af104   | income: private pension or annuity       |
| af105   | byte | %8.0g | af105   | income: widow or war widows pension      |
| af106   | byte | %8.0g | af106   | income: widowed mothers allowance        |
| af116   | byte | %8.0g | af116   | income: severe disablement allowance     |
| af117   | byte | %8.0g | af117   | income: invalidity pension               |
| af118   | byte | %8.0g | af118   | income: industrial injury allowance      |
| af119   | byte | %8.0g | af119   | income: attendance allowance             |
| af120   | byte | %8.0g | af120   | income: mobility allowance               |
| af121   | byte | %8.0g | af121   | income: invalid care allowance           |
| af122   | byte | %8.0g | af122   | income: war disability pension           |
| af133   | byte | %8.0g | af133   | income: unemployment benefit (ub)        |
| af132   | byte | %8.0g | af132   | income: income support (is)              |
| af131   | byte | %8.0g | af131   | income: both ub and is                   |
| af134   | byte | %8.0g | af134   | income: ni sickness benefit              |
| af135   | byte | %8.0g | af135   | income: child benefit                    |
| af136   | byte | %8.0g | af136   | income: one parent benefit               |
| af137   | byte | %8.0g | af137   | income: family credit                    |
| af138   | byte | %8.0g | af138   | income: maternity allowance              |
| af139   | byte | %8.0g | af139   | income: housing benefit                  |
| af140   | byte | %8.0g | af140   | income: community charge benefit         |
| af141   | byte | %8.0g | af141   | income: other state benefit              |
| af151   | byte | %8.0g | af151   | income: educational grant                |
| af152   | byte | %8.0g | af152   | income: trade union payments             |
| af153   | byte | %8.0g | af153   | income: maintenance or alimony           |
| af154   | byte | %8.0g | af154   | income: payments from relations          |
| af155   | byte | %8.0g | af155   | income: rent from lodgers                |
| af156   | byte | %8.0g | af156   | income: rent from other property         |
| af157   | byte | %8.0g | af157   | income: foster allowance                 |
| af158   | byte | %8.0g | af158   | income: sickness or accident insurance   |
| af159   | byte | %8.0g | af159   | income: any other payment                |
| anf1    | byte | %8.0g | anf1    | income: total number of cited sources    |
| afisbm  | byte | %8.0g | afisbm  | month income support/supp. benefit began |
| afisby  | byte | %8.0g | afisby  | year income support/supp. benefit began  |
| afisit  | byte | %8.0g | afisit  | financial situation                      |
| afisitc | byte | %8.0g | afisitc | change in financial position last year   |
| afisitx | byte | %8.0g | afisitx | financial expectations for year ahead    |

|          |       |       |          |                                          |
|----------|-------|-------|----------|------------------------------------------|
| afiyrdi  | byte  | %8.0g | afiyrdi  | income last year from dividends/interest |
| asave    | byte  | %8.0g | asave    | saves from current income                |
| asaved   | int   | %8.0g | asaved   | amount saved each month                  |
| asavey   | byte  | %8.0g | asavey   | reason for saving                        |
| abankac  | byte  | %8.0g | abankac  | holds a personal savings account         |
| abankjt  | byte  | %8.0g | abankjt  | holds joint account with other in h/hold |
| abankj1  | byte  | %8.0g | abankj1  | pno 1st person with whom shares account  |
| abankj2  | byte  | %8.0g | abankj2  | pno 2nd person with whom shares account  |
| ahudraw  | byte  | %8.0g | ahudraw  | who draws from the joint bank account    |
| afthh    | byte  | %8.0g | afthh    | transfers money within household         |
| afthh1   | byte  | %8.0g | afthh1   | 1st recipient of internal money transfer |
| afthh11  | byte  | %8.0g | afthh11  | pays rent to 1st person                  |
| afthh12  | byte  | %8.0g | afthh12  | pays housekeeping to 1st person          |
| afthh13  | byte  | %8.0g | afthh13  | pays board to 1st person                 |
| afthh14  | byte  | %8.0g | afthh14  | pays allowance to 1st person             |
| afthh15  | byte  | %8.0g | afthh15  | pays h/hold bills or food to 1st person  |
| afthh16  | byte  | %8.0g | afthh16  | makes other transfer to 1st person       |
| afthh1v  | int   | %8.0g | afthh1v  | amount transferred to 1st person         |
| afthh1w  | float | %9.0g | afthh1w  | weeks covered by transfer to 1st person  |
| afthh2   | byte  | %8.0g | afthh2   | 2nd recipient of internal money transfer |
| afthh21  | byte  | %8.0g | afthh21  | pays rent to 2nd person                  |
| afthh22  | byte  | %8.0g | afthh22  | pays housekeeping to 2nd person          |
| afthh23  | byte  | %8.0g | afthh23  | pays board to 2nd person                 |
| afthh24  | byte  | %8.0g | afthh24  | pays allowance to 2nd person             |
| afthh25  | byte  | %8.0g | afthh25  | pays h/hold bills or food to 2nd person  |
| afthh26  | byte  | %8.0g | afthh26  | makes other transfer to 2nd person       |
| afthh2v  | int   | %8.0g | afthh2v  | amount transferred to 2nd person         |
| afthh2w  | float | %9.0g | afthh2w  | weeks covered by transfer to 2nd person  |
| afthh3   | byte  | %8.0g | afthh3   | 3rd recipient of internal money transfer |
| afthh31  | byte  | %8.0g | afthh31  | pays rent to 3rd person                  |
| afthh32  | byte  | %8.0g | afthh32  | pays housekeeping to 3rd person          |
| afthh33  | byte  | %8.0g | afthh33  | pays board to 3rd person                 |
| afthh34  | byte  | %8.0g | afthh34  | pays allowance to 3rd person             |
| afthh35  | byte  | %8.0g | afthh35  | pays h/hold bills or food to 3rd person  |
| afthh36  | byte  | %8.0g | afthh36  | makes other transfer to 3rd person       |
| afthh3v  | int   | %8.0g | afthh3v  | amount transferred to 3rd person         |
| afthh3w  | float | %9.0g | afthh3w  | weeks covered by transfer to 3rd person  |
| aftexhh  | byte  | %8.0g | aftexhh  | transfers money to non-resident person   |
| aftexa   | byte  | %8.0g | aftexa   | relationship to 1st non-res recipient    |
| aftexa1  | byte  | %8.0g | aftexa1  | maintenance payment to 1st non-resident  |
| aftexa2  | byte  | %8.0g | aftexa2  | hh bills payment to 1st non-resident     |
| aftexa3  | byte  | %8.0g | aftexa3  | education payment to 1st non-resident    |
| aftexa4  | byte  | %8.0g | aftexa4  | allowance/spending money to 1st non-res  |
| aftexa5  | byte  | %8.0g | aftexa5  | loan repayment to 1st non-resident       |
| aftexa6  | byte  | %8.0g | aftexa6  | other payment to 1st non-resident        |
| aftexb   | byte  | %8.0g | aftexb   | relationship to 2nd non-res recipient    |
| aftexb1  | byte  | %8.0g | aftexb1  | maintenance payment to 2nd non-resident  |
| aftexb2  | byte  | %8.0g | aftexb2  | hh bills payment to 2nd non-resident     |
| aftexb3  | byte  | %8.0g | aftexb3  | education payment to 2nd non-resident    |
| aftexb4  | byte  | %8.0g | aftexb4  | allowance/spending money to 2nd non-res  |
| aftexb5  | byte  | %8.0g | aftexb5  | loan repayment to 2nd non-resident       |
| aftexb6  | byte  | %8.0g | aftexb6  | other payment to 2nd non-resident        |
| aftexc   | byte  | %8.0g | aftexc   | relationship to 3rd non-res recipient    |
| aftexc1  | byte  | %8.0g | aftexc1  | maintenance payment to 3rd non-resident  |
| aftexc2  | byte  | %8.0g | aftexc2  | hh bills payment to 3rd non-resident     |
| aftexc3  | byte  | %8.0g | aftexc3  | education payment to 3rd non-resident    |
| aftexc4  | byte  | %8.0g | aftexc4  | allowance/spending money to 3rd non-res  |
| aftexc5  | byte  | %8.0g | aftexc5  | loan repayment to 3rd non-resident       |
| aftexc6  | byte  | %8.0g | aftexc6  | other payment to 3rd non-resident        |
| axpself  | int   | %8.0g | axpself  | amount of weekly personal spending       |
| aspinhh  | byte  | %8.0g | aspinhh  | whether living with spouse or partner    |
| ahubuys  | byte  | %8.0g | ahubuys  | who does the grocery shopping (couples)  |
| ahufrys  | byte  | %8.0g | ahufrys  | who does the cooking (couples)           |
| ahumops  | byte  | %8.0g | ahumops  | who does the cleaning (couples)          |
| ahuiiron | byte  | %8.0g | ahuiiron | who does the washing/ironing (couples)   |
| ahhchl2  | byte  | %8.0g | ahhchl2  | child/ren under 12 in household          |
| ahusits  | byte  | %8.0g | ahusits  | who is responsible for childcare         |
| ahuruns  | byte  | %8.0g | ahuruns  | how household finances are organised     |
| ahuboss  | byte  | %8.0g | ahuboss  | who has last say in financial decisions  |
| ahupays  | byte  | %8.0g | ahupays  | who is responsible for h/hold bills      |
| ahukeep  | byte  | %8.0g | ahukeep  | who is responsible for housekeeping      |
| ahuasks  | byte  | %8.0g | ahuasks  | consultation about spending on self      |
| ahushop  | byte  | %8.0g | ahushop  | who does the grocery shopping (singles)  |

|          |       |        |          |                                          |
|----------|-------|--------|----------|------------------------------------------|
| ahucook  | byte  | %8.0g  | ahucook  | who does the cooking (singles)           |
| ahudust  | byte  | %8.0g  | ahudust  | who does the cleaning (singles)          |
| ahuwash  | byte  | %8.0g  | ahuwash  | who does the washing /ironing (singles)  |
| adriver  | byte  | %8.0g  | adriver  | holds a full driving licence             |
| acaruse  | byte  | %8.0g  | acaruse  | has use of car or van                    |
| acarowr  | byte  | %8.0g  | acarowr  | who owns the car                         |
| acarowrp | byte  | %8.0g  | acarowrp | pno of car owner, if household member    |
| acarjob  | byte  | %8.0g  | acarjob  | whose employer provides company car      |
| acarval  | long  | %12.0g | acarval  | value of car                             |
| aivfa    | byte  | %8.0g  | aivfa    | h/hold finance section: respondent alone |
| aivfb    | byte  | %8.0g  | aivfb    | h/hold finance section: partner alone    |
| aivfc    | byte  | %8.0g  | aivfc    | h/hold finance section: adult present    |
| aivfd    | byte  | %8.0g  | aivfd    | h/hold finance section: child present    |
| aivfoih  | byte  | %8.0g  | aivfoih  | hour interview finished                  |
| aivfoim  | byte  | %8.0g  | aivfoim  | minute interview finished                |
| aivsc    | byte  | %8.0g  | aivsc    | ic: self completion document             |
| aivl     | byte  | %8.0g  | aivl     | others present during interview          |
| aiv2     | byte  | %8.0g  | aiv2     | did others influence interview           |
| aiv4     | byte  | %8.0g  | aiv4     | cooperation of respondent                |
| aiv5     | byte  | %8.0g  | aiv5     | completion of tracking schedule          |
| aiv6a    | byte  | %8.0g  | aiv6a    | problems affecting interview: eyesight   |
| aiv6b    | byte  | %8.0g  | aiv6b    | problems affecting interview: hearing    |
| aiv6c    | byte  | %8.0g  | aiv6c    | problems affecting interview: reading    |
| aiv6d    | byte  | %8.0g  | aiv6d    | problems affecting interview: english    |
| aiv6e    | byte  | %8.0g  | aiv6e    | problems affecting interview: language   |
| aiv6f    | byte  | %8.0g  | aiv6f    | problems affecting interview: interpret  |
| aiv7     | byte  | %8.0g  | aiv7     | pno of interpreter                       |
| aghqa    | byte  | %8.0g  | aghqa    | ghq: concentration                       |
| aghqb    | byte  | %8.0g  | aghqb    | ghq: loss of sleep                       |
| aghqc    | byte  | %8.0g  | aghqc    | ghq: playing a useful role               |
| aghqd    | byte  | %8.0g  | aghqd    | ghq: capable of making decisions         |
| aghqe    | byte  | %8.0g  | aghqe    | ghq: constantly under strain             |
| aghqf    | byte  | %8.0g  | aghqf    | ghq: problem overcoming difficulties     |
| aghqg    | byte  | %8.0g  | aghqg    | ghq: enjoy day-to-day activities         |
| aghqh    | byte  | %8.0g  | aghqh    | ghq: ability to face problems            |
| aghqi    | byte  | %8.0g  | aghqi    | ghq: unhappy or depressed                |
| aghqj    | byte  | %8.0g  | aghqj    | ghq: losing confidence                   |
| aghqk    | byte  | %8.0g  | aghqk    | ghq: believe in self-worth               |
| aghql    | byte  | %8.0g  | aghql    | ghq: general happiness                   |
| aopfama  | byte  | %8.0g  | aopfama  | pre-school child suffers if mother works |
| aopfamb  | byte  | %8.0g  | aopfamb  | family suffers if woman works full time  |
| aopfamc  | byte  | %8.0g  | aopfamc  | woman and family happier if she works    |
| aopfamd  | byte  | %8.0g  | aopfamd  | husband and wife should both contribute  |
| aopfame  | byte  | %8.0g  | aopfame  | full time job makes women independent    |
| aopfamf  | byte  | %8.0g  | aopfamf  | husband should earn, wife stay at home   |
| aopfamg  | byte  | %8.0g  | aopfamg  | children need father as much as mother   |
| aopfamh  | byte  | %8.0g  | aopfamh  | employers should help with childcare     |
| aopfami  | byte  | %8.0g  | aopfami  | single parents are as good as couples    |
| assupa   | byte  | %8.0g  | assupa   | is there someone who will listen         |
| assupb   | byte  | %8.0g  | assupb   | is there someone to help in a crisis     |
| assupc   | byte  | %8.0g  | assupc   | is there someone you can relax with      |
| assupd   | byte  | %8.0g  | assupd   | anyone who really appreciates you        |
| assupe   | byte  | %8.0g  | assupe   | anyone you can count on to offer comfort |
| assupl   | byte  | %8.0g  | assupl   | sex of closest friend                    |
| pid      | long  | %12.0g |          | cross-wave person identifier             |
| aivfio   | byte  | %8.0g  | aivfio   | individual interview outcome             |
| aiodc    | byte  | %8.0g  | aiodc    | document check                           |
| axrwght  | float | %9.0g  |          | x-sectional respondent weight            |
| axewght  | float | %9.0g  |          | x-sectional enumerated individual weight |
| aregion  | byte  | %8.0g  | aregion  | region / metropolitan area               |
| aprrs2i  | byte  | %8.0g  | aprrs2i  | relationship of proxy to informant       |
| apripn   | byte  | %8.0g  | apripn   | person number of informant               |
| aprwhy   | byte  | %8.0g  | aprwhy   | reason for proxy                         |
| aprfehq  | byte  | %8.0g  | aprfehq  | proxy's highest fe qualification         |
| aprsehq  | byte  | %8.0g  | aprsehq  | proxy's highest school qualification     |
| aprfitb  | byte  | %8.0g  | aprfitb  | proxy's personal income, banded          |
| aprjbft  | byte  | %8.0g  | aprjbft  | proxy's job full or part time            |
| ahgr2r   | byte  | %8.0g  | ahgr2r   | relationship to reference person         |
| amastat  | byte  | %8.0g  | amastat  | marital status                           |
| ahgspn   | byte  | %8.0g  | ahgspn   | pno of spouse/partner                    |
| ahgest   | byte  | %8.0g  | ahgest   | employment status - hh grid              |
| ahgfno   | byte  | %8.0g  | ahgfno   | pno of father                            |
| ahgmno   | byte  | %8.0g  | ahgmno   | pno of mother                            |

|          |       |       |          |                                          |
|----------|-------|-------|----------|------------------------------------------|
| ahgjnly  | byte  | %8.0g | ahgjnly  | whether joined household since 1.9.90    |
| ahgmjn   | byte  | %8.0g | ahgmjn   | month joined household                   |
| ahgyjn   | byte  | %8.0g | ahgyjn   | year joined household                    |
| aage     | byte  | %8.0g | aage     | age at date of interview                 |
| aage12   | byte  | %8.0g | aage12   | age at 1.12.1991                         |
| abutype  | byte  | %8.0g | abutype  | benefit unit type                        |
| abuno    | byte  | %8.0g | abuno    | benefit unit number                      |
| anchild  | byte  | %8.0g | anchild  | number of own children in household      |
| ahoh     | byte  | %8.0g | ahoh     | conventional head of household indicator |
| ahhsize  | byte  | %8.0g | ahhsize  | number of people in household            |
| ahhtype  | byte  | %8.0g | ahhtype  | household type                           |
| atenure  | byte  | %8.0g | atenure  | housing tenure                           |
| aqfedhi  | byte  | %8.0g | aqfedhi  | highest educational qualification        |
| aqfvoc   | byte  | %8.0g | aqfvoc   | has vocational qualifications            |
| aqfachi  | byte  | %8.0g | aqfachi  | highest academic qualification           |
| ajbft    | byte  | %8.0g | ajbft    | employed full time                       |
| aedgen   | int   | %8.0g | aedgen   | days spent in general training           |
| aedspec  | int   | %8.0g | aedspec  | days spent in specific training          |
| apargsc  | byte  | %8.0g | apargsc  | rg social class: father's job            |
| apaseg   | byte  | %8.0g | apaseg   | socio economic group: father's job       |
| apagold  | byte  | %8.0g | apagold  | goldthorpe social class: father's job    |
| apaisco  | str4  | %4s   | apaisco  | international soc: father's job          |
| apacssm  | float | %9.0g | apacssm  | cambridge scale males: father's job      |
| apacssf  | float | %9.0g | apacssf  | cambridge scale females: father's job    |
| apahgs   | float | %9.0g | apahgs   | hope - goldthorpe scale: father's job    |
| apasec   | int   | %8.0g | apasec   | socio-economic class: father's job       |
| amargsc  | byte  | %8.0g | amargsc  | rg social class: mother's job            |
| amaseg   | byte  | %8.0g | amaseg   | socio economic group: mother's job       |
| amagold  | byte  | %8.0g | amagold  | goldthorpe social class: mother's job    |
| amaisco  | str4  | %4s   | amaisco  | international soc: mother's job          |
| amacssm  | float | %9.0g | amacssm  | cambridge scale males: mother's job      |
| amacssf  | float | %9.0g | amacssf  | cambridge scale females: mother's job    |
| amahgs   | float | %9.0g | amahgs   | hope - goldthorpe scale: mother's job    |
| amasec   | int   | %8.0g | amasec   | socio-economic class: mother's job       |
| apayg    | float | %9.0g | apayg    | gross rate of pay per month:last payment |
| apayn    | float | %9.0g | apayn    | net rate of pay per month: last payment  |
| apaygu   | float | %9.0g | apaygu   | usual gross pay per month: current job   |
| apaynu   | float | %9.0g | apaynu   | usual net pay per month: current job     |
| apaygty  | float | %9.0g | apaygty  | usual monthly gross pay: sept this year  |
| apaygly  | float | %9.0g | apaygly  | usual monthly gross pay: sept year ago   |
| apaynty  | float | %9.0g | apaynty  | usual monthly net pay: sept this year    |
| apaynly  | float | %9.0g | apaynly  | usual monthly net pay: sept year ago     |
| ajsprof  | float | %9.0g | ajsprof  | monthly self employed profit             |
| ajspayg  | float | %9.0g | ajspayg  | monthly self employed gross pay          |
| acjsten  | int   | %8.0g | acjsten  | length (days) of current labour market   |
| acjswk9  | float | %9.0g | acjswk9  | weeks in current spell: year to 1.9.91   |
| ajlid    | byte  | %8.0g | ajlid    | identifier of latest job                 |
| ajlyid   | byte  | %8.0g | ajlyid   | identifier of job spell at 1.9.90        |
| ajtyid   | byte  | %8.0g | ajtyid   | identifier of job spell at 1.9.91        |
| ajbseg   | byte  | %8.0g | ajbseg   | socio economic group: present job        |
| ajbgold  | byte  | %8.0g | ajbgold  | goldthorpe social class: present job     |
| ajbrgsc  | byte  | %8.0g | ajbrgsc  | rg social class: present job             |
| ajbisco  | str4  | %4s   | ajbisco  | international soc: present job           |
| ajbcssm  | float | %9.0g | ajbcssm  | cambridge scale males: present job       |
| ajbcssf  | float | %9.0g | ajbcssf  | cambridge scale females: present job     |
| ajbhgs   | float | %9.0g | ajbhgs   | hope - goldthorpe scale: present job     |
| ajbsec   | int   | %8.0g | ajbsec   | socio-economic class: current job        |
| anjbwks  | float | %9.0g | anjbwks  | annual weeks employed: year to sept 1    |
| anjuwks  | float | %9.0g | anjuwks  | annual weeks unemployed: year to sept 1  |
| anjiwks  | float | %9.0g | anjiwks  | annual weeks inactive: year to sept 1    |
| anjbnew  | byte  | %8.0g | anjbnew  | no. different employers: year to sept 1  |
| anjbsp   | byte  | %8.0g | anjbsp   | no. employment spells: year to sept 1    |
| anjusp   | byte  | %8.0g | anjusp   | no. unemployment spells: year to sept 1  |
| anjisp   | byte  | %8.0g | anjisp   | no. inactive spells: year to sept 1      |
| ajbstat1 | byte  | %8.0g | ajbstat1 | employment status on sept 1, year ago    |
| ajbstatt | byte  | %8.0g | ajbstatt | employment status on sept 1, this year   |
| ajbsocly | int   | %8.0g | ajbsocly | occupation (soc): job on sept 1, 1990    |
| ajlseg   | byte  | %8.0g | ajlseg   | socio economic group: last job           |
| ajlgold  | byte  | %8.0g | ajlgold  | goldthorpe social class: last job        |
| ajlrgsc  | byte  | %8.0g | ajlrgsc  | rg social class: last job                |
| ajlisco  | str4  | %4s   | ajlisco  | international soc: last job              |
| ajlcssm  | float | %9.0g | ajlcssm  | cambridge scale males: last job          |
| ajlcssf  | float | %9.0g | ajlcssf  | cambridge scale females: last job        |

|           |        |        |           |                                          |
|-----------|--------|--------|-----------|------------------------------------------|
| ajlhgs    | float  | %9.0g  | ajlhgs    | hope - goldthorpe scale: last job        |
| ajlsec    | int    | %8.0g  | ajlsec    | socio-economic class: last job           |
| avote     | byte   | %8.0g  | avote     | political party supported                |
| anorgm    | byte   | %8.0g  | anorgm    | number of organisations member of        |
| anorga    | byte   | %8.0g  | anorga    | number of organisations active in        |
| afimnp    | float  | %9.0g  | afimnp    | pension income: last month               |
| afimnb    | float  | %9.0g  | afimnb    | benefit income: last month               |
| afimni    | float  | %9.0g  | afimni    | investment income: last month            |
| afimnt    | float  | %9.0g  | afimnt    | transfer income: last month              |
| afimnlnl  | float  | %9.0g  | afimnlnl  | non-labour income: last month            |
| afimnl    | float  | %9.0g  | afimnl    | labour income: last month                |
| afimn     | float  | %9.0g  | afimn     | total income: last month                 |
| afiyrl    | double | %10.0g | afiyrl    | annual labour income (1.9.90-1.9.91)     |
| afiyrnlnl | float  | %9.0g  | afiyrnlnl | annual non-labour income (1.9.90-1.9.91) |
| afiyryp   | float  | %9.0g  | afiyryp   | annual pension income (1.9.90-1.9.91)    |
| afiyrb    | float  | %9.0g  | afiyrb    | annual benefit income (1.9.90-1.9.91)    |
| afiyrt    | float  | %9.0g  | afiyrt    | annual transfer income (1.9.90-1.9.91)   |
| afiyri    | float  | %9.0g  | afiyri    | annual investment income (1.9.90-1.9.91) |
| afiy      | double | %10.0g | afiy      | annual income (1.9.90-1.9.91)            |
| afihhmn   | float  | %9.0g  | afihhmn   | household income: month before interview |
| ahlghql   | byte   | %8.0g  | ahlghql   | subjective wellbeing (ghq) 1: likert     |
| ahlghq2   | byte   | %8.0g  | ahlghq2   | subjective wellbeing (ghq) 2: caseness   |
| asplib    | byte   | %8.0g  | asplib    | whether spouse/partner employed now      |
| aspsoc    | int    | %8.0g  | aspsoc    | spouse/partner's occupation              |
| asplibhr  | byte   | %8.0g  | asplibhr  | spouse/partner's weekly work hours       |
| asplibot  | byte   | %8.0g  | asplibot  | spouse/partner's weekly overtime         |
| asppayg   | float  | %9.0g  | asppayg   | spouse/partner's monthly gross pay       |
| asplibyr  | byte   | %8.0g  | asplibyr  | whether spse/partner employed last year  |
| ahlprba   | byte   | %8.0g  | ahlprba   | health problems: arms, legs, hands, etc  |
| ahlprbb   | byte   | %8.0g  | ahlprbb   | health problems: sight                   |
| ahlprbc   | byte   | %8.0g  | ahlprbc   | health problems: hearing                 |
| ahlprbd   | byte   | %8.0g  | ahlprbd   | health problems: skin conditions/allergy |
| ahlprbe   | byte   | %8.0g  | ahlprbe   | health problems: chest/breathing         |
| ahlprbf   | byte   | %8.0g  | ahlprbf   | health problems: heart/blood pressure    |
| ahlprbg   | byte   | %8.0g  | ahlprbg   | health problems: stomach or digestion    |
| ahlprbh   | byte   | %8.0g  | ahlprbh   | health problems: diabetes                |
| ahlprbi   | byte   | %8.0g  | ahlprbi   | health problems: anxiety, depression, et |
| ahlprbj   | byte   | %8.0g  | ahlprbj   | health problems: alcohol or drugs        |
| ahlprbk   | byte   | %8.0g  | ahlprbk   | health problems: epilepsy                |
| ahlprbl   | byte   | %8.0g  | ahlprbl   | health problems: migraine                |
| ahlprbm   | byte   | %8.0g  | ahlprbm   | health problems: other                   |
| aj2payi   | byte   | %8.0g  | aj2payi   | imputation flag - aj2pay (base)          |
| afiyrdii  | byte   | %8.0g  | afiyrdii  | imputation flag - afiyrdi (base)         |
| aprfitbi  | byte   | %8.0g  | aprfitbi  | imputation flag - aprfitb (base)         |
| apaygui   | byte   | %8.0g  | apaygui   | imputation flag - apaygu (derived)       |
| apaynui   | byte   | %8.0g  | apaynui   | imputation flag - apaynu (derived)       |
| apaygti   | byte   | %8.0g  | apaygti   | imputation flag - apaygty (derived)      |
| apaygli   | byte   | %8.0g  | apaygli   | imputation flag - apaygly (derived)      |
| apaynti   | byte   | %8.0g  | apaynti   | imputation flag - apaynty (derived)      |
| apaynli   | byte   | %8.0g  | apaynli   | imputation flag - apaynly (derived)      |
| ajsprofi  | byte   | %8.0g  | ajsprofi  | imputation flag - ajsprof (derived)      |
| ajspaygi  | byte   | %8.0g  | ajspaygi  | imputation flag - ajspayg (derived)      |
| afimnpi   | byte   | %8.0g  | afimnpi   | imputation flag - afimnp (derived)       |
| afimnbi   | byte   | %8.0g  | afimnbi   | imputation flag - afimnb (derived)       |
| afimnii   | byte   | %8.0g  | afimnii   | imputation flag - afimni (derived)       |
| afimnti   | byte   | %8.0g  | afimnti   | imputation flag - afimnt (derived)       |
| afimnlnli | byte   | %8.0g  | afimnlnli | imputation flag - afimnlnl (derived)     |
| afimnli   | byte   | %8.0g  | afimnli   | imputation flag - afimnl (derived)       |
| afimnthi  | byte   | %8.0g  | afimnthi  | imputation flag - afimn (derived)        |
| afiyarli  | byte   | %8.0g  | afiyarli  | imputation flag - afiyrl (derived)       |
| afiyrnli  | byte   | %8.0g  | afiyrnli  | imputation flag - afiyrnlnl (derived)    |
| afiyрпи   | byte   | %8.0g  | afiyрпи   | imputation flag - afiyryp (derived)      |
| afiyрbi   | byte   | %8.0g  | afiyрbi   | imputation flag - afiyrb (derived)       |
| afiyrti   | byte   | %8.0g  | afiyrti   | imputation flag - afiyrt (derived)       |
| afiyrii   | byte   | %8.0g  | afiyrii   | imputation flag - afiyri (derived)       |
| afiyeari  | byte   | %8.0g  | afiyeari  | imputation flag - afiy (derived)         |
| asppaygi  | byte   | %8.0g  | asppaygi  | imputation flag - asppayg (derived)      |
| afihhmni  | byte   | %8.0g  | afihhmni  | imputation flag - afihhmn (derived)      |
| amrjend   | int    | %8.0g  | amrjend   | year left most recent job                |
| amrjsoc   | int    | %8.0g  | amrjsoc   | occupation (soc) of most recent job      |
| amrjsic   | int    | %8.0g  | amrjsic   | industry (sic) of most recent job        |
| amrjsemp  | byte   | %8.0g  | amrjsemp  | employee or self emp., most recent job   |
| amrjboss  | byte   | %8.0g  | amrjboss  | hired employees, most recent job         |

|          |       |        |          |                                          |
|----------|-------|--------|----------|------------------------------------------|
| amrjmngr | byte  | %8.0g  | amrjmngr | managerial duties, most recent job       |
| amrjsize | byte  | %8.0g  | amrjsize | number at workplace, most recent job     |
| amrjseg  | byte  | %8.0g  | amrjseg  | socio economic group: most recent job    |
| amrjgold | byte  | %8.0g  | amrjgold | goldthorpe class: most recent job        |
| amrjrjsc | byte  | %8.0g  | amrjrjsc | rg social class: most recent job         |
| amrjisco | str4  | %4s    |          | international soc: most recent job       |
| amrjcsm  | float | %9.0g  | amrjcsm  | cambridge scale m: most recent job       |
| amrjcsmf | float | %9.0g  | amrjcsmf | cambridge scale f: most recent job       |
| amrjhgs  | float | %9.0g  | amrjhgs  | hope-goldthorpe scale: most recent job   |
| amrjsec  | int   | %8.0g  | amrjsec  | socio-economic class: most recent job    |
| aplnowy4 | int   | %8.0g  | aplnowy4 | year moved to present address: 4 digit   |
| ayr2uk4  | int   | %8.0g  | ayr2uk4  | year came to britain: 4 digit            |
| ajbbgy4  | int   | %8.0g  | ajbbgy4  | year started current job: 4 digit        |
| ajsprby4 | int   | %8.0g  | ajsprby4 | s/emp: date accounts began: 4 digit year |
| ajsprey4 | int   | %8.0g  | ajsprey4 | s/emp: date accounts ended: 4 digit year |
| ajspyby4 | int   | %8.0g  | ajspyby4 | s/emp: year gross pay began: 4 digit     |
| ajspyey4 | int   | %8.0g  | ajspyey4 | s/emp: year gross pay ended: 4 digit     |
| ajsbgy4  | int   | %8.0g  | ajsbgy4  | s/emp: year started present job: 4 digit |
| acjsbgy4 | int   | %8.0g  | acjsbgy4 | year labour force stat began: 4 digit    |
| ajlend4  | int   | %8.0g  | ajlend4  | year left last job: 4 digit              |
| asppid   | long  | %12.0g | asppid   | cross-wave person identifier of spouse   |
| afpid    | long  | %12.0g | afpid    | cross-wave person identifier of father   |
| ampid    | long  | %12.0g | ampid    | cross-wave person identifier of mother   |
| aregion2 | byte  | %8.0g  | aregion2 | government office region                 |
| aisced   | byte  | %8.0g  | aisced   | iscd levels                              |
| acasmin  | byte  | %8.0g  | acasmin  | casmin levels                            |
| ajbiscon | int   | %8.0g  | ajbiscon | international soc (num): present job     |
| ajliscon | int   | %8.0g  | ajliscon | international soc (num): last job        |
| amrjiscn | int   | %8.0g  | amrjiscn | international soc (num): most recent job |
| amaiscon | int   | %8.0g  | amaiscon | international soc (num): mother's job    |
| apaiscon | int   | %8.0g  | apaiscon | international soc (num): father's job    |

Sorted by:

. sum

| Variable  | Obs   | Mean      | Std. Dev. | Min     | Max     |
|-----------|-------|-----------|-----------|---------|---------|
| ahid      | 10264 | 1394265   | 218523    | 1000209 | 1761811 |
| apno      | 10264 | 1.642537  | .807344   | 1       | 7       |
| adoid     | 10264 | 15.9583   | 9.349026  | -9      | 31      |
| adoim     | 10264 | 10.07258  | 1.136882  | -9      | 12      |
| aivsoih   | 10264 | 15.35055  | 3.479128  | -9      | 22      |
| aivsoim   | 10264 | 26.33691  | 17.45403  | -9      | 59      |
| alknbrd   | 10264 | .8058262  | 1.517382  | -9      | 2       |
| alkmove   | 10264 | 1.092459  | 1.625076  | -9      | 2       |
| alkmovy   | 10264 | 2.309334  | 20.15485  | -9      | 96      |
| aplever   | 10264 | -7.714049 | 1.632926  | -9      | 1       |
| aplnowm   | 10264 | 5.354053  | 4.967608  | -9      | 12      |
| aplnowy   | 10264 | 75.3333   | 22.64858  | -9      | 97      |
| aplb4d    | 10264 | 120.7786  | 88.04177  | -9      | 368     |
| aplb4c    | 10264 | -7.337783 | 6.488899  | -9      | 85      |
| aplbordnd | 10264 | 113.6858  | 95.33007  | -9      | 368     |
| aplbordnc | 10264 | -4.821999 | 13.40642  | -9      | 92      |
| ayr2uk    | 10264 | -3.041017 | 19.10638  | -9      | 91      |
| adobm     | 10264 | 6.42537   | 3.419098  | -2      | 12      |
| adoby     | 10264 | 1945.263  | 50.57713  | -2      | 1975    |
| asex      | 10264 | 1.529131  | .499175   | 1       | 2       |
| apaju     | 10264 | -6.991426 | 2.658688  | -9      | 1       |
| apasoc    | 10264 | 477.1474  | 322.099   | -9      | 999     |
| apasemp   | 10264 | -.1734217 | 3.208517  | -9      | 2       |
| apaboss   | 10264 | -6.622272 | 3.32328   | -9      | 2       |
| apamngr   | 10264 | -.8654521 | 4.778084  | -9      | 3       |
| amaju     | 10264 | -3.502825 | 3.954998  | -9      | 1       |
| amasoc    | 10264 | 245.9642  | 344.7584  | -9      | 999     |
| amasemp   | 10264 | -4.231196 | 4.451722  | -9      | 2       |
| amaboss   | 10264 | -7.588757 | 1.850422  | -9      | 2       |

|         |       |           |          |    |    |
|---------|-------|-----------|----------|----|----|
| amamngr | 10264 | -4.133671 | 5.115433 | -9 | 3  |
| amlstat | 10264 | 2.364867  | 1.800391 | -9 | 5  |
| aschool | 10264 | -7.785659 | 1.432915 | -9 | 2  |
| ascend  | 10264 | 15.09772  | 3.910115 | -9 | 22 |
| asctype | 10264 | 4.478956  | 3.128379 | -9 | 9  |
| ascnow  | 10264 | 1.968726  | .3912421 | -8 | 2  |
| afetype | 10264 | 5.294232  | 2.914639 | -9 | 7  |
| afenow  | 10264 | -7.753215 | 1.49838  | -9 | 1  |
| afeend  | 10264 | .6997272  | 13.72851 | -9 | 70 |
| aqfhas  | 10264 | 1.348012  | 1.395099 | -9 | 2  |
| aqfa    | 10264 | -.3656469 | 1.668548 | -9 | 1  |
| aqfb    | 10264 | -.3126461 | 1.694996 | -9 | 1  |
| aqfc    | 10264 | -.2842946 | 1.708301 | -9 | 1  |
| aqfd    | 10264 | -.3077747 | 1.697323 | -9 | 1  |
| aqfe    | 10264 | -.3488893 | 1.677136 | -9 | 1  |
| aqff    | 10264 | -.3697389 | 1.666418 | -9 | 1  |
| aqfg    | 10264 | -.3421668 | 1.680522 | -9 | 1  |
| aqfh    | 10264 | -.3586321 | 1.672169 | -9 | 1  |
| aqfi    | 10264 | -.3641855 | 1.669305 | -9 | 1  |
| aqfj    | 10264 | -.3573655 | 1.672819 | -9 | 1  |
| aqfk    | 10264 | -.3794817 | 1.661297 | -9 | 1  |
| aqfl    | 10264 | -.3231684 | 1.689911 | -9 | 1  |
| aqfm    | 10264 | -.3779228 | 1.662121 | -9 | 1  |
| aqfn    | 10264 | -.2841972 | 1.708346 | -9 | 1  |
| aqfed   | 10264 | 1.339341  | 1.185884 | -9 | 2  |
| aqfedb  | 10264 | -.0970382 | 1.379099 | -9 | 1  |
| anqfedb | 10264 | -6.117206 | 4.435843 | -9 | 14 |
| aqfedc  | 10264 | -.1597818 | 1.350204 | -9 | 1  |
| anqfedc | 10264 | -7.069758 | 2.898054 | -9 | 10 |
| aqfedd  | 10264 | -.2048909 | 1.327209 | -9 | 1  |
| anqfedd | 10264 | -7.447292 | 2.468302 | -9 | 11 |
| aqfede  | 10264 | -.1951481 | 1.332339 | -9 | 1  |
| anqfede | 10264 | -7.289848 | 2.912052 | -9 | 12 |
| aqfedf  | 10264 | -.1072681 | 1.374625 | -9 | 1  |
| anqfedf | 10264 | -6.081937 | 4.743053 | -9 | 14 |
| aqfedg  | 10264 | -.1286048 | 1.364999 | -9 | 1  |
| anqfedg | 10264 | -6.4091   | 4.342193 | -9 | 14 |
| aqfedh  | 10264 | -.2251559 | 1.316245 | -9 | 1  |
| anqfedh | 10264 | -7.723305 | 1.589764 | -9 | 10 |
| aqfedi  | 10264 | -.2387958 | 1.308637 | -9 | 1  |
| anqfedi | 10264 | -7.858535 | 1.116195 | -9 | 10 |
| aqfedj  | 10264 | -.1360094 | 1.361564 | -9 | 1  |
| anqfedj | 10264 | -6.784295 | 3.329693 | -9 | 8  |
| aqfeda  | 10264 | -.206742  | 1.326224 | -9 | 1  |
| anqfeda | 10264 | -7.424104 | 2.697502 | -9 | 18 |
| aqfedk  | 10264 | -.2448363 | 1.305208 | -9 | 1  |
| anqfedk | 10264 | -7.919622 | .7847747 | -9 | 12 |
| aqfedl  | 10264 | -.2157054 | 1.321408 | -9 | 1  |
| anqfedl | 10264 | -7.527572 | 2.422816 | -9 | 12 |
| aqfedm  | 10264 | -.2469797 | 1.303983 | -9 | 1  |
| anqfedm | 10264 | -7.947973 | .4740378 | -9 | 5  |
| aqfedn  | 10264 | -.2454209 | 1.304875 | -9 | 1  |
| anqfedn | 10264 | -7.928001 | .6939131 | -9 | 8  |
| aqfedo  | 10264 | -.2241816 | 1.316782 | -9 | 1  |
| anqfedo | 10264 | -7.676832 | 1.870687 | -9 | 30 |
| aqfedp  | 10264 | -.244544  | 1.305375 | -9 | 1  |
| anqfedp | 10264 | -7.924299 | .6726937 | -9 | 4  |
| aqfedq  | 10264 | -.2364575 | 1.309955 | -9 | 1  |
| anqfedq | 10264 | -7.840316 | 1.181942 | -9 | 11 |
| aqfedr  | 10264 | -.2425955 | 1.306485 | -9 | 1  |
| anqfedr | 10264 | -7.900526 | .8839644 | -9 | 10 |



|          |       |           |          |    |     |
|----------|-------|-----------|----------|----|-----|
| aqfeds   | 10264 | -.2191154 | 1.319555 | -9 | 1   |
| anqfeds  | 10264 | -7.639517 | 2.007785 | -9 | 25  |
| aeaage   | 10264 | 1.518511  | 1.76861  | -7 | 3   |
| aednew   | 10264 | -.9471941 | 4.452083 | -9 | 2   |
| aednew1  | 10264 | -7.274065 | 2.446944 | -9 | 2   |
| aednew2  | 10264 | -7.259743 | 2.484827 | -9 | 2   |
| aednew3  | 10264 | -7.249221 | 2.565872 | -9 | 2   |
| aednew4  | 10264 | -7.251461 | 2.549825 | -9 | 2   |
| aednewd  | 10264 | -4.385425 | 21.57021 | -9 | 372 |
| apaper1  | 10264 | 1.059918  | 1.592641 | -9 | 2   |
| apaper2  | 10264 | .215608   | 6.803458 | -9 | 14  |
| apaperm  | 10264 | -2.145655 | 5.012925 | -9 | 14  |
| apaperp  | 10264 | -6.398188 | 4.485446 | -9 | 14  |
| aivda    | 10264 | -2.187354 | 4.532287 | -9 | 4   |
| aivdb    | 10264 | .2656859  | 1.45458  | -7 | 1   |
| aivdc    | 10264 | .0265004  | 1.395165 | -7 | 1   |
| aivdd    | 10264 | -.0668355 | 1.359918 | -7 | 1   |
| ahlstat  | 10264 | -.1435113 | 1.325354 | -7 | 1   |
| ahlzest  | 10264 | 2.080865  | .9588067 | -9 | 5   |
| ahldsbl  | 10264 | 1.502143  | 1.776182 | -9 | 3   |
| ahlprb   | 10264 | 1.920791  | .6558563 | -9 | 2   |
| ahlprb1  | 10264 | -4.533905 | 3.967939 | -9 | 0   |
| ahlprb2  | 10264 | -1.153546 | 6.606004 | -9 | 13  |
| ahlprb3  | 10264 | -1.977202 | 6.033237 | -9 | 13  |
| ahlprb4  | 10264 | -2.77085  | 5.161232 | -9 | 13  |
| ahllt    | 10264 | -3.167771 | 4.583151 | -9 | 13  |
| ahllta   | 10264 | 1.854248  | .4467073 | -9 | 2   |
| ahlltb   | 10264 | -6.840218 | 2.901984 | -9 | 1   |
| ahlltc   | 10264 | -6.833301 | 2.919422 | -9 | 1   |
| ahlltd   | 10264 | -6.876754 | 2.807805 | -9 | 1   |
| ahllte   | 10264 | -6.834762 | 2.915748 | -9 | 1   |
| ahlltw   | 10264 | -6.845772 | 2.887896 | -9 | 1   |
| ahlendw  | 10264 | 1.821317  | .4937785 | -9 | 2   |
| ahlltwa  | 10264 | -6.447486 | 3.452602 | -9 | 3   |
| ahl2gp   | 10264 | -6.303196 | 3.848217 | -9 | 4   |
| axdts    | 10264 | 2.05758   | 2.123604 | -9 | 5   |
| anxdts   | 10264 | 1.885035  | .380303  | -9 | 2   |
| axdt1m   | 10264 | -6.990647 | 2.827068 | -9 | 4   |
| axdt1y   | 10264 | -6.386984 | 4.722391 | -9 | 12  |
| axdt2m   | 10264 | 2.380164  | 30.28755 | -9 | 91  |
| axdt2y   | 10264 | -7.782151 | 1.659888 | -9 | 12  |
| axdt3m   | 10264 | -6.672837 | 11.2186  | -9 | 91  |
| axdt3y   | 10264 | -7.925468 | .7801233 | -9 | 12  |
| axdt1pl  | 10264 | -7.693687 | 5.154109 | -9 | 91  |
| axdt2pl  | 10264 | -6.705768 | 3.736542 | -9 | 7   |
| axdt3pl  | 10264 | -7.812256 | 1.334936 | -9 | 7   |
| ahosp    | 10264 | -7.929267 | .6747523 | -8 | 7   |
| ahospd   | 10264 | 1.839147  | .7653353 | -9 | 2   |
| ahospch  | 10264 | -5.892342 | 8.638439 | -9 | 365 |
| ahospnhs | 10264 | -7.510912 | 2.180601 | -9 | 3   |
| ahlsv    | 10264 | -6.957619 | 2.854737 | -9 | 3   |
| ahlsva   | 10264 | 1.765588  | .5056444 | -9 | 2   |
| ahlsvan  | 10264 | .0586516  | .3540789 | -9 | 1   |
| ahlsvaf  | 10264 | -7.404618 | 2.177781 | -9 | 2   |
| ahlsvb   | 10264 | -7.424104 | 2.147056 | -9 | 3   |
| ahlsvbn  | 10264 | .0128605  | .2878389 | -9 | 1   |
| ahlsvbf  | 10264 | -7.791407 | 1.2632   | -9 | 3   |
| ahlsvc   | 10264 | -7.79433  | 1.28395  | -9 | 3   |
| ahlsvcn  | 10264 | -.0009743 | .2630202 | -9 | 1   |
| ahlsvcn  | 10264 | -7.91553  | .7010359 | -9 | 2   |

|          |       |           |          |    |    |
|----------|-------|-----------|----------|----|----|
| ahlsvcf  | 10264 | -7.912607 | .7374008 | -9 | 3  |
| ahlsvd   | 10264 | .0147116  | .2754672 | -9 | 1  |
| ahlsvdn  | 10264 | -7.798811 | 1.228678 | -9 | 3  |
| ahlsvdf  | 10264 | -7.802124 | 1.216307 | -9 | 3  |
| ahlsve   | 10264 | .0685892  | .3539443 | -9 | 1  |
| -----    |       |           |          |    |    |
| ahlsven  | 10264 | -7.284197 | 2.442479 | -9 | 3  |
| ahlsvef  | 10264 | -7.313426 | 2.402593 | -9 | 3  |
| ahlsvf   | 10264 | .026403   | .309618  | -9 | 1  |
| ahlsvfn  | 10264 | -7.640881 | 1.770697 | -9 | 3  |
| ahlsvff  | 10264 | -7.646239 | 1.758167 | -9 | 3  |
| -----    |       |           |          |    |    |
| ahlsvg   | 10264 | .0128605  | .2878389 | -9 | 1  |
| ahlsvgn  | 10264 | -7.791115 | 1.276389 | -9 | 3  |
| ahlsvgf  | 10264 | -7.798617 | 1.250888 | -9 | 3  |
| ahlsvh   | 10264 | -.0037023 | .2577569 | -9 | 1  |
| ahlsvhn  | 10264 | -7.943687 | .4839277 | -9 | 2  |
| -----    |       |           |          |    |    |
| ahlsvhf  | 10264 | -7.94583  | .4638213 | -9 | 2  |
| ahlsvi   | 10264 | .0300078  | .3150636 | -9 | 1  |
| ahlsvin  | 10264 | -7.632307 | 1.741849 | -9 | 3  |
| ahlsvif  | 10264 | -7.645168 | 1.711073 | -9 | 3  |
| ahlsvj   | 10264 | .0120811  | .2865156 | -9 | 1  |
| -----    |       |           |          |    |    |
| ahlsvjn  | 10264 | -7.795986 | 1.251436 | -9 | 3  |
| ahlsvjf  | 10264 | -7.808164 | 1.211819 | -9 | 3  |
| ahlsvk   | 10264 | -.0062354 | .252745  | -9 | 1  |
| ahlsvkn  | 10264 | -7.959567 | .3029975 | -9 | 2  |
| ahlsvkf  | 10264 | -7.960542 | .2899834 | -9 | 2  |
| -----    |       |           |          |    |    |
| ahlcka   | 10264 | .2872175  | 1.48175  | -9 | 1  |
| ahlckan  | 10264 | -3.089147 | 4.582176 | -9 | 3  |
| ahlckb   | 10264 | .0530008  | 1.434774 | -9 | 1  |
| ahlckbn  | 10264 | -5.186185 | 4.254672 | -9 | 3  |
| ahlckc   | 10264 | -.1120421 | 1.428853 | -9 | 1  |
| -----    |       |           |          |    |    |
| ahlckcn  | 10264 | -6.609022 | 3.244345 | -9 | 3  |
| ahlckd   | 10264 | .2415238  | 1.477436 | -9 | 1  |
| ahlckdn  | 10264 | -3.629092 | 4.519372 | -9 | 3  |
| ahlcke   | 10264 | -.206742  | 1.560164 | -9 | 1  |
| ahlcken  | 10264 | -7.001169 | 2.82598  | -9 | 3  |
| -----    |       |           |          |    |    |
| ahlckf   | 10264 | -.2240842 | 1.580187 | -9 | 1  |
| ahlckfn  | 10264 | -7.089731 | 2.715134 | -9 | 3  |
| ahlckg   | 10264 | -3.694174 | 4.145378 | -9 | 1  |
| ahlckgn  | 10264 | -6.53069  | 3.303722 | -9 | 3  |
| ahlckh   | 10264 | -3.807482 | 4.040543 | -9 | 1  |
| -----    |       |           |          |    |    |
| ahlckhn  | 10264 | -7.43599  | 2.143037 | -9 | 3  |
| asmoker  | 10264 | 1.687841  | .5955307 | -9 | 2  |
| ancigs   | 10264 | -1.178098 | 11.68107 | -9 | 80 |
| aophla   | 10264 | 1.568005  | 1.890517 | -9 | 5  |
| aophlb   | 10264 | 2.975156  | 2.216892 | -9 | 5  |
| -----    |       |           |          |    |    |
| aophlc   | 10264 | 2.014809  | 2.082573 | -9 | 5  |
| arach16  | 10264 | 1.529326  | 1.648823 | -7 | 2  |
| ahlch    | 10264 | -6.393804 | 3.603378 | -9 | 2  |
| ahlch1   | 10264 | -7.710249 | 1.71291  | -9 | 6  |
| ahlch2   | 10264 | -7.768414 | 1.305462 | -9 | 5  |
| -----    |       |           |          |    |    |
| ahlch3   | 10264 | -7.775039 | 1.250687 | -9 | 5  |
| ahlch4   | 10264 | -7.777182 | 1.233422 | -9 | 6  |
| aaidhh   | 10264 | .520265   | 3.50612  | -9 | 3  |
| aaidhua  | 10264 | -7.587685 | 2.023469 | -9 | 6  |
| aaidhub  | 10264 | -7.667576 | 1.624611 | -9 | 4  |
| -----    |       |           |          |    |    |
| aaidhuc  | 10264 | -7.670986 | 1.605005 | -9 | 2  |
| aaidxhh  | 10264 | 1.574435  | 1.679618 | -9 | 2  |
| anaidxhh | 10264 | -6.973402 | 2.977092 | -9 | 7  |
| aaidhul  | 10264 | -6.937549 | 3.058285 | -9 | 5  |
| aaidhu2  | 10264 | -7.639809 | 1.859463 | -9 | 5  |
| -----    |       |           |          |    |    |
| aaidpl1  | 10264 | -6.951189 | 2.999148 | -9 | 2  |

|         |       |           |          |    |       |
|---------|-------|-----------|----------|----|-------|
| aaidpl2 | 10264 | -7.666699 | 1.715198 | -9 | 2     |
| aaidhrs | 10264 | -6.626559 | 3.894967 | -9 | 10    |
| aivma   | 10264 | .2741621  | 1.45592  | -7 | 1     |
| aivmb   | 10264 | .0237724  | 1.394237 | -7 | 1     |
| -----   |       |           |          |    |       |
| aivmc   | 10264 | -.0709275 | 1.358205 | -7 | 1     |
| aivmd   | 10264 | -.1409782 | 1.326581 | -7 | 1     |
| ajbhas  | 10264 | 1.434431  | .5064018 | -9 | 2     |
| ajboff  | 10264 | -3.680339 | 4.922751 | -9 | 3     |
| ajboffy | 10264 | -7.614186 | 2.0701   | -9 | 8     |
| -----   |       |           |          |    |       |
| ajbterm | 10264 | -2.530982 | 4.504246 | -9 | 3     |
| ajbsoc  | 10264 | 304.6327  | 319.8291 | -9 | 999   |
| ajbsic  | 10264 | 4002.377  | 3839.131 | -9 | 9900  |
| ajbsemp | 10264 | -2.526403 | 4.483308 | -9 | 2     |
| ajbmngr | 10264 | -2.568492 | 5.266195 | -9 | 3     |
| -----   |       |           |          |    |       |
| ajbsect | 10264 | -2.867303 | 5.067827 | -9 | 8     |
| ajbsize | 10264 | -1.458398 | 6.704537 | -9 | 11    |
| ajbmix  | 10264 | -2.755066 | 5.474167 | -9 | 5     |
| ajbhrrs | 10264 | 13.39117  | 22.6403  | -9 | 97    |
| ajbot   | 10264 | -2.131041 | 7.32216  | -9 | 76    |
| -----   |       |           |          |    |       |
| ajbotpd | 10264 | -5.208691 | 5.979804 | -9 | 52    |
| ajbhrlk | 10264 | -2.823753 | 5.147954 | -9 | 3     |
| ajbtime | 10264 | -1.741037 | 6.257644 | -9 | 10    |
| ajbonus | 10264 | -3.085737 | 4.838989 | -9 | 2     |
| ajbrise | 10264 | -3.224084 | 4.71764  | -9 | 2     |
| -----   |       |           |          |    |       |
| atujbpl | 10264 | -3.247564 | 4.686924 | -9 | 2     |
| atuin1  | 10264 | -5.561087 | 4.070025 | -9 | 2     |
| atuin2  | 10264 | -4.715608 | 4.652337 | -9 | 2     |
| ajbopps | 10264 | -3.218726 | 4.720441 | -9 | 2     |
| ajbed   | 10264 | -3.146629 | 4.775811 | -9 | 2     |
| -----   |       |           |          |    |       |
| ajbed1  | 10264 | -6.042186 | 3.837749 | -9 | 2     |
| ajbed2  | 10264 | -6.061867 | 3.776181 | -9 | 2     |
| ajbed3  | 10264 | -6.090316 | 3.711448 | -9 | 2     |
| ajbed4  | 10264 | -6.055436 | 3.813    | -9 | 2     |
| ajbed5  | 10264 | -6.102494 | 3.709622 | -9 | 2     |
| -----   |       |           |          |    |       |
| ajbedd  | 10264 | -3.133769 | 19.47893 | -9 | 395   |
| ajbpen  | 10264 | -3.303098 | 4.628412 | -9 | 2     |
| ajbpenm | 10264 | -4.993667 | 4.309684 | -9 | 2     |
| ajbpl   | 10264 | -2.681216 | 5.146674 | -9 | 5     |
| ajbttwt | 10264 | 7.214439  | 22.02429 | -9 | 600   |
| -----   |       |           |          |    |       |
| ajbttwm | 10264 | -1.232755 | 6.736265 | -9 | 9     |
| ajbsat1 | 10264 | -2.048324 | 6.091975 | -9 | 7     |
| ajbsat2 | 10264 | -1.701481 | 6.358921 | -9 | 7     |
| ajbsat3 | 10264 | -1.16173  | 6.864379 | -9 | 7     |
| ajbsat4 | 10264 | -1.370713 | 6.689028 | -9 | 7     |
| -----   |       |           |          |    |       |
| ajbsat5 | 10264 | -1.036048 | 6.959136 | -9 | 7     |
| ajbsat6 | 10264 | -1.105904 | 6.887268 | -9 | 7     |
| ajbsat7 | 10264 | -1.283028 | 6.737653 | -9 | 7     |
| ajbsat  | 10264 | -1.190472 | 6.801057 | -9 | 7     |
| apaygl  | 10264 | 535.9466  | 2466.625 | -9 | 80000 |
| -----   |       |           |          |    |       |
| apaygw  | 10264 | -2.537521 | 8.351048 | -9 | 52    |
| apaynl  | 10264 | 240.6537  | 646.3306 | -9 | 38000 |
| apaynw  | 10264 | -3.429738 | 5.695802 | -9 | 52    |
| apayslp | 10264 | -3.182775 | 5.157248 | -9 | 3     |
| apayusl | 10264 | -3.720577 | 4.55799  | -9 | 2     |
| -----   |       |           |          |    |       |
| apayu   | 10264 | 56.29102  | 716.5138 | -9 | 30000 |
| apayuw  | 10264 | -7.077428 | 3.399908 | -9 | 52    |
| apayug  | 10264 | -7.21931  | 2.55851  | -9 | 3     |
| apaydf1 | 10264 | -7.257892 | 2.294934 | -9 | 1     |
| apaydf2 | 10264 | -7.263835 | 2.274745 | -9 | 1     |
| -----   |       |           |          |    |       |
| apaydf3 | 10264 | -7.263737 | 2.275078 | -9 | 1     |
| apaydf4 | 10264 | -7.265199 | 2.270084 | -9 | 1     |

|         |       |           |          |    |        |
|---------|-------|-----------|----------|----|--------|
| apaydf5 | 10264 | -7.26325  | 2.276739 | -9 | 1      |
| apaydf6 | 10264 | -7.265296 | 2.269751 | -9 | 1      |
| apaydf7 | 10264 | -7.232073 | 2.38048  | -9 | 1      |
| -----   |       |           |          |    |        |
| apaydf8 | 10264 | -7.226325 | 2.399073 | -9 | 1      |
| ajbbgd  | 10264 | -.9544037 | 9.578075 | -9 | 31     |
| ajbbgm  | 10264 | -.8359314 | 7.479575 | -9 | 12     |
| ajbbgy  | 10264 | 39.50926  | 47.39989 | -9 | 91     |
| ajbbgly | 10264 | -3.294525 | 4.62705  | -9 | 2      |
| -----   |       |           |          |    |        |
| apayly  | 10264 | 380.5667  | 2158.972 | -9 | 45000  |
| apaylyw | 10264 | -4.514004 | 8.652661 | -9 | 52     |
| apaylyg | 10264 | -5.678196 | 4.044742 | -9 | 3      |
| ajbhrly | 10264 | 2.669914  | 19.90405 | -9 | 97     |
| ajbotly | 10264 | -5.649649 | 4.77638  | -9 | 97     |
| -----   |       |           |          |    |        |
| apays   | 10264 | 112.4877  | 1359.814 | -9 | 55000  |
| apaysw  | 10264 | -7.062578 | 5.254953 | -9 | 52     |
| apaysg  | 10264 | -7.432385 | 2.203942 | -9 | 3      |
| ajbhrbg | 10264 | -5.658905 | 10.01074 | -9 | 84     |
| ajbotbg | 10264 | -7.465705 | 2.296792 | -9 | 50     |
| -----   |       |           |          |    |        |
| apaygyr | 10264 | 4281.298  | 8845.2   | -9 | 347000 |
| apaygya | 10264 | -4.494349 | 4.435532 | -8 | 4      |
| ajsboss | 10264 | -7.231878 | 2.619643 | -9 | 2      |
| ajssize | 10264 | -7.745421 | 1.579298 | -9 | 9      |
| ajshrs  | 10264 | -3.934041 | 15.18897 | -9 | 97     |
| -----   |       |           |          |    |        |
| ajshrlk | 10264 | -7.208301 | 2.672202 | -9 | 3      |
| ajstime | 10264 | -6.96931  | 3.615083 | -9 | 10     |
| ajstype | 10264 | -7.255943 | 2.498068 | -9 | 4      |
| ajsaccs | 10264 | -7.267634 | 2.450003 | -8 | 2      |
| ajsprf  | 10264 | 419.9064  | 3891.445 | -9 | 99997  |
| -----   |       |           |          |    |        |
| ajsprbm | 10264 | -7.592654 | 2.301707 | -9 | 12     |
| ajsprby | 10264 | -5.328624 | 15.82792 | -9 | 91     |
| ajsprem | 10264 | -7.59129  | 2.315015 | -9 | 12     |
| ajsprey | 10264 | -5.312256 | 15.95642 | -9 | 91     |
| ajspayl | 10264 | 144.397   | 1803.873 | -9 | 66000  |
| -----   |       |           |          |    |        |
| ajspybm | 10264 | -7.741621 | 1.857088 | -9 | 12     |
| ajspyby | 10264 | -6.495421 | 11.91956 | -9 | 91     |
| ajspyem | 10264 | -7.738309 | 1.892438 | -9 | 12     |
| ajspyey | 10264 | -6.472623 | 12.06369 | -9 | 91     |
| ajspl   | 10264 | -7.122272 | 3.0318   | -9 | 6      |
| -----   |       |           |          |    |        |
| ajsttw  | 10264 | -6.589341 | 8.202518 | -9 | 180    |
| ajsttwm | 10264 | -7.36214  | 2.857473 | -9 | 9      |
| ajssat1 | 10264 | -7.034879 | 3.326899 | -9 | 7      |
| ajssat2 | 10264 | -7.025624 | 3.364363 | -9 | 7      |
| ajssat3 | 10264 | -6.879384 | 3.825186 | -9 | 7      |
| -----   |       |           |          |    |        |
| ajssat4 | 10264 | -6.909977 | 3.724337 | -9 | 7      |
| ajssat5 | 10264 | -6.985191 | 3.482893 | -9 | 7      |
| ajssat  | 10264 | -6.94622  | 3.613074 | -9 | 7      |
| ajsbgd  | 10264 | -7.081352 | 3.882457 | -8 | 31     |
| ajsbgm  | 10264 | -6.972233 | 3.648749 | -8 | 12     |
| -----   |       |           |          |    |        |
| ajsbgy  | 10264 | -1.135814 | 24.10334 | -8 | 91     |
| arach12 | 10264 | -2.072292 | 4.826628 | -8 | 2      |
| ajbchc1 | 10264 | -7.011496 | 3.53588  | -9 | 11     |
| ajbchc2 | 10264 | -7.181898 | 3.029515 | -9 | 11     |
| ajbchc3 | 10264 | -7.339439 | 2.358154 | -9 | 11     |
| -----   |       |           |          |    |        |
| axpchcf | 10264 | -7.593433 | 1.916619 | -9 | 2      |
| axpchc  | 10264 | -7.341582 | 6.058393 | -9 | 180    |
| ahuxpch | 10264 | -7.800955 | 1.290139 | -9 | 6      |
| ahunurs | 10264 | -7.246882 | 2.649421 | -9 | 6      |
| ajulk1  | 10264 | -4.146824 | 4.795595 | -9 | 2      |
| -----   |       |           |          |    |        |
| ajulk4  | 10264 | -4.44963  | 4.773542 | -9 | 2      |
| ajulkjb | 10264 | -4.73636  | 4.576699 | -9 | 2      |
| ajuspec | 10264 | -6.662607 | 3.271748 | -9 | 2      |

|          |       |           |          |    |      |
|----------|-------|-----------|----------|----|------|
| ajusoc   | 10264 | 27.10298  | 145.2822 | -9 | 990  |
| ajupayx  | 10264 | 7.106294  | 145.7914 | -9 | 9997 |
|          |       |           |          |    |      |
| ajuhrsx  | 10264 | -4.069856 | 12.29788 | -9 | 90   |
| ajupayl  | 10264 | 3.411341  | 38.68532 | -9 | 700  |
| ajuhysl  | 10264 | -3.999415 | 12.02707 | -9 | 90   |
| ajbaspl  | 10264 | .8840608  | 5.768978 | -9 | 8    |
| ajbaspl2 | 10264 | .5897311  | 5.647453 | -9 | 8    |
|          |       |           |          |    |      |
| ajblky1  | 10264 | .1697194  | 5.378569 | -9 | 8    |
| ajblky2  | 10264 | .6237334  | 5.69711  | -9 | 8    |
| ajbub    | 10264 | -.2781567 | 4.168324 | -9 | 2    |
| ajbuby   | 10264 | -7.631235 | 1.915369 | -9 | 3    |
| aj2has   | 10264 | 1.597136  | 1.691873 | -9 | 2    |
|          |       |           |          |    |      |
| aj2soc   | 10264 | 35.08057  | 161.0351 | -9 | 999  |
| aj2semp  | 10264 | -7.232463 | 2.537209 | -9 | 2    |
| aj2hrs   | 10264 | -5.679365 | 10.63169 | -9 | 97   |
| aj2pay   | 10264 | 4.655203  | 131.9649 | -8 | 9997 |
| ajbhha   | 10264 | -.5821317 | 4.281036 | -9 | 2    |
|          |       |           |          |    |      |
| ajbhbb   | 10264 | -.5493959 | 4.306771 | -9 | 2    |
| ajbhbc   | 10264 | -.5524162 | 4.310308 | -9 | 2    |
| ajbhbd   | 10264 | -.5318589 | 4.321278 | -9 | 2    |
| ajbhbe   | 10264 | -.5369252 | 4.317651 | -9 | 2    |
| ajbhbf   | 10264 | -.5452065 | 4.31746  | -9 | 2    |
|          |       |           |          |    |      |
| ajbhh    | 10264 | -6.517634 | 9.917308 | -9 | 96   |
| aivea    | 10264 | .2644193  | 1.457387 | -9 | 1    |
| aiveb    | 10264 | .0191933  | 1.395809 | -9 | 1    |
| aivec    | 10264 | -.0781372 | 1.358383 | -9 | 1    |
| aived    | 10264 | -.1470187 | 1.326954 | -9 | 1    |
|          |       |           |          |    |      |
| ajbstat  | 10264 | 2.687841  | 2.411158 | -7 | 10   |
| acjsbgd  | 10264 | 4.949727  | 9.979937 | -9 | 31   |
| acjsbgm  | 10264 | 5.059431  | 4.85717  | -9 | 12   |
| acjsbgy  | 10264 | 78.78264  | 23.23298 | -9 | 91   |
| acjsbly  | 10264 | .9528449  | 1.565958 | -9 | 2    |
|          |       |           |          |    |      |
| anjbs    | 10264 | -5.920889 | 3.740378 | -9 | 7    |
| ajbhad   | 10264 | -4.969505 | 4.279473 | -9 | 2    |
| ajlend   | 10264 | 16.23032  | 39.3857  | -9 | 91   |
| ajlsoc   | 10264 | 159.2529  | 299.155  | -9 | 999  |
| ajlsic   | 10264 | 1811.626  | 3241.167 | -9 | 9900 |
|          |       |           |          |    |      |
| ajlsemp  | 10264 | -5.430631 | 4.059777 | -9 | 2    |
| ajlboss  | 10264 | -7.799786 | 1.280101 | -9 | 2    |
| ajlmngr  | 10264 | -5.213562 | 4.667695 | -9 | 3    |
| ajlsize  | 10264 | -4.456839 | 6.010327 | -9 | 11   |
| aivja    | 10264 | .2789361  | 1.456652 | -7 | 1    |
|          |       |           |          |    |      |
| aivjb    | 10264 | .0239673  | 1.394303 | -7 | 1    |
| aivjc    | 10264 | -.0743375 | 1.356766 | -7 | 1    |
| aivjd    | 10264 | -.1467264 | 1.323788 | -7 | 1    |
| aopsoca  | 10264 | 3.136302  | 2.305185 | -9 | 5    |
| aopsocb  | 10264 | 1.943005  | 2.059186 | -9 | 5    |
|          |       |           |          |    |      |
| aopsocc  | 10264 | 2.501559  | 2.297514 | -9 | 5    |
| aopsocd  | 10264 | 2.452845  | 2.270364 | -9 | 5    |
| aopsoce  | 10264 | 2.514419  | 2.212431 | -9 | 5    |
| aopsocf  | 10264 | 2.368277  | 2.197363 | -9 | 5    |
| aopcls1  | 10264 | 1.295207  | 1.730208 | -9 | 2    |
|          |       |           |          |    |      |
| aopcls2  | 10264 | 6.46288   | 17.66813 | -9 | 96   |
| aopcls3  | 10264 | 1.699045  | 1.976707 | -9 | 5    |
| avotel   | 10264 | 1.265296  | 1.667084 | -9 | 2    |
| avote2   | 10264 | -2.708203 | 4.724662 | -9 | 2    |
| avote3   | 10264 | -4.538094 | 5.736977 | -9 | 11   |
|          |       |           |          |    |      |
| avote4   | 10264 | -1.510522 | 4.595696 | -9 | 10   |
| avote5   | 10264 | -1.295596 | 4.972664 | -9 | 3    |
| avote6   | 10264 | 2.221064  | 1.998426 | -9 | 4    |
| aopr1g1  | 10264 | 2.198655  | 2.92769  | -9 | 14   |

|         |       |           |          |    |    |
|---------|-------|-----------|----------|----|----|
| aoprlg2 | 10264 | 2.746493  | 2.216578 | -9 | 4  |
| aoprlg3 | 10264 | 2.400331  | 2.194482 | -9 | 4  |
| arace   | 10264 | .8754871  | 1.788617 | -9 | 9  |
| aorgm   | 10264 | 1.136302  | 1.64507  | -9 | 2  |
| aorgma  | 10264 | -.2202845 | 1.32555  | -9 | 1  |
| aorgaa  | 10264 | -.2348987 | 1.31083  | -9 | 1  |
| aorgmb  | 10264 | -.0814497 | 1.392058 | -9 | 1  |
| aorgab  | 10264 | -.2189205 | 1.319662 | -9 | 1  |
| aorgmc  | 10264 | -.2226228 | 1.324276 | -9 | 1  |
| aorgac  | 10264 | -.2348012 | 1.310885 | -9 | 1  |
| aorgmd  | 10264 | -.2154131 | 1.328186 | -9 | 1  |
| aorgad  | 10264 | -.2007015 | 1.329426 | -9 | 1  |
| aorgme  | 10264 | -.1845284 | 1.344365 | -9 | 1  |
| aorgae  | 10264 | -.2188231 | 1.319715 | -9 | 1  |
| aorgmf  | 10264 | -.1536438 | 1.359651 | -9 | 1  |
| aorgaf  | 10264 | -.1511107 | 1.354407 | -9 | 1  |
| aorgmg  | 10264 | -.2164848 | 1.327608 | -9 | 1  |
| aorgag  | 10264 | -.2121005 | 1.323355 | -9 | 1  |
| aorgmh  | 10264 | -.2167771 | 1.32745  | -9 | 1  |
| aorgah  | 10264 | -.2161925 | 1.321144 | -9 | 1  |
| aorgmi  | 10264 | -.1298714 | 1.370827 | -9 | 1  |
| aorgai  | 10264 | -.1635814 | 1.34834  | -9 | 1  |
| aorgmj  | 10264 | -.0952845 | 1.386198 | -9 | 1  |
| aorgaj  | 10264 | -.083788  | 1.384761 | -9 | 1  |
| aorgmk  | 10264 | -.2320733 | 1.319075 | -9 | 1  |
| aorgak  | 10264 | -.2308067 | 1.313116 | -9 | 1  |
| aorgml  | 10264 | -.2426929 | 1.313125 | -9 | 1  |
| aorgal  | 10264 | -.2407443 | 1.307535 | -9 | 1  |
| aorgmm  | 10264 | -.1531567 | 1.359885 | -9 | 1  |
| aorgam  | 10264 | -.1637763 | 1.348244 | -9 | 1  |
| aorga   | 10264 | 1.23032   | 1.659495 | -9 | 2  |
| aoppol1 | 10264 | 1.765686  | 2.137518 | -9 | 4  |
| aoppol2 | 10264 | 2.081157  | 2.313814 | -9 | 4  |
| aoppol3 | 10264 | 1.22993   | 1.818613 | -9 | 3  |
| aoppol4 | 10264 | 1.082911  | 1.836396 | -9 | 3  |
| aivva   | 10264 | .2689984  | 1.455109 | -7 | 1  |
| aivvb   | 10264 | .0287412  | 1.395924 | -7 | 1  |
| aivvc   | 10264 | -.0741426 | 1.356849 | -7 | 1  |
| aivvd   | 10264 | -.1482853 | 1.323025 | -7 | 1  |
| af101   | 10264 | -.079014  | 1.442554 | -9 | 1  |
| af102   | 10264 | -.0537802 | 1.523287 | -9 | 2  |
| af103   | 10264 | -.1856976 | 1.450474 | -9 | 3  |
| af104   | 10264 | -.2268122 | 1.414695 | -9 | 4  |
| af105   | 10264 | -.2051832 | 1.46856  | -9 | 5  |
| af106   | 10264 | -.2546765 | 1.377081 | -9 | 6  |
| af116   | 10264 | -.1866719 | 1.764635 | -9 | 16 |
| af117   | 10264 | .2604248  | 3.280289 | -9 | 17 |
| af118   | 10264 | -.171668  | 1.882899 | -9 | 18 |
| af119   | 10264 | -.0369252 | 2.495343 | -9 | 19 |
| af120   | 10264 | -.0210444 | 2.602502 | -9 | 20 |
| af121   | 10264 | -.2032346 | 1.774648 | -9 | 21 |
| af122   | 10264 | -.2110288 | 1.742425 | -9 | 22 |
| af133   | 10264 | .5303975  | 5.274595 | -9 | 33 |
| af132   | 10264 | 2.268706  | 8.817953 | -9 | 32 |
| af131   | 10264 | .0162705  | 3.257237 | -9 | 31 |
| af134   | 10264 | .152767   | 4.008814 | -9 | 34 |
| af135   | 10264 | 5.91855   | 13.53744 | -9 | 35 |
| af136   | 10264 | .4438815  | 5.216596 | -9 | 36 |
| af137   | 10264 | .1787802  | 4.275139 | -9 | 37 |
| af138   | 10264 | -.0304949 | 3.279762 | -9 | 38 |
| af139   | 10264 | 2.928001  | 10.85401 | -9 | 39 |

|         |       |           |          |    |      |
|---------|-------|-----------|----------|----|------|
| af140   | 10264 | 3.706547  | 12.12533 | -9 | 40   |
| af141   | 10264 | -.1208106 | 2.789895 | -9 | 41   |
| af151   | 10264 | .7440569  | 7.266027 | -9 | 51   |
| af152   | 10264 | -.1328917 | 2.955362 | -9 | 52   |
| af153   | 10264 | .4634645  | 6.34655  | -9 | 53   |
| af154   | 10264 | .2772798  | 5.575825 | -9 | 54   |
| af155   | 10264 | .2221356  | 5.355578 | -9 | 55   |
| af156   | 10264 | .4383281  | 6.413661 | -9 | 56   |
| af157   | 10264 | -.2424006 | 1.76327  | -9 | 57   |
| af158   | 10264 | -.1233437 | 3.175037 | -9 | 58   |
| af159   | 10264 | .3504482  | 6.170168 | -9 | 59   |
| anf1    | 10264 | .7662705  | 1.903096 | -9 | 8    |
| afisbm  | 10264 | -8.314692 | 2.890033 | -9 | 12   |
| afisby  | 10264 | -4.685016 | 19.69461 | -9 | 91   |
| afisit  | 10264 | 2.022116  | 2.074844 | -9 | 5    |
| afisitc | 10264 | 1.896434  | 1.924344 | -9 | 3    |
| afisitx | 10264 | 1.730222  | 2.05749  | -9 | 3    |
| afiyrdi | 10264 | 1.632794  | 1.891714 | -7 | 4    |
| asave   | 10264 | 1.236068  | 1.727601 | -9 | 2    |
| asaved  | 10264 | 33.24065  | 151.7787 | -9 | 9997 |
| asavey  | 10264 | -1.254384 | 16.71604 | -9 | 96   |
| abankac | 10264 | 1.000487  | 1.67857  | -9 | 2    |
| abankjt | 10264 | -.2671473 | 3.634171 | -9 | 2    |
| abankj1 | 10264 | -3.755748 | 4.726616 | -9 | 6    |
| abankj2 | 10264 | -4.389224 | 3.978433 | -9 | 6    |
| ahudraw | 10264 | -3.689887 | 4.88705  | -9 | 7    |
| afthh   | 10264 | .0017537  | 3.727019 | -9 | 2    |
| afthh1  | 10264 | -5.984996 | 3.934221 | -9 | 5    |
| afthh11 | 10264 | -6.347428 | 3.248503 | -9 | 1    |
| afthh12 | 10264 | -6.272116 | 3.397573 | -9 | 1    |
| afthh13 | 10264 | -6.3144   | 3.317233 | -9 | 1    |
| afthh14 | 10264 | -6.332229 | 3.281687 | -9 | 1    |
| afthh15 | 10264 | -6.311672 | 3.320192 | -9 | 1    |
| afthh16 | 10264 | -6.358924 | 3.226874 | -9 | 1    |
| afthh1v | 10264 | 12.1781   | 94.4838  | -9 | 4000 |
| afthh1w | 10264 | -5.97641  | 4.360329 | -9 | 52   |
| afthh2  | 10264 | -6.294719 | 3.307453 | -9 | 5    |
| afthh21 | 10264 | -7.868375 | .9100206 | -9 | 1    |
| afthh22 | 10264 | -7.867498 | .9180489 | -9 | 1    |
| afthh23 | 10264 | -7.86818  | .9118108 | -9 | 1    |
| afthh24 | 10264 | -7.863991 | .9494754 | -9 | 1    |
| afthh25 | 10264 | -7.864478 | .9451739 | -9 | 1    |
| afthh26 | 10264 | -7.866037 | .9312738 | -9 | 1    |
| afthh2v | 10264 | -7.15871  | 13.51586 | -9 | 550  |
| afthh2w | 10264 | -7.83221  | 1.371726 | -9 | 52   |
| afthh3  | 10264 | -6.321902 | 3.24312  | -9 | 5    |
| afthh31 | 10264 | -7.955378 | .3758213 | -9 | 0    |
| afthh32 | 10264 | -7.955378 | .3758213 | -9 | 0    |
| afthh33 | 10264 | -7.955378 | .3758213 | -9 | 0    |
| afthh34 | 10264 | -7.954891 | .3866266 | -9 | 1    |
| afthh35 | 10264 | -7.954793 | .3887515 | -9 | 1    |
| afthh36 | 10264 | -7.954793 | .3887515 | -9 | 1    |
| afthh3v | 10264 | -7.879579 | 3.927497 | -9 | 250  |
| afthh3w | 10264 | -7.952002 | .5026965 | -9 | 13   |
| aftexhh | 10264 | 1.600838  | 1.710843 | -9 | 2    |
| aftexa  | 10264 | -7.260912 | 2.940795 | -9 | 96   |
| aftexa1 | 10264 | -7.444466 | 2.014716 | -9 | 1    |
| aftexa2 | 10264 | -7.447097 | 2.004314 | -9 | 1    |
| aftexa3 | 10264 | -7.449825 | 1.993465 | -9 | 1    |
| aftexa4 | 10264 | -7.444564 | 2.014332 | -9 | 1    |

|          |       |           |          |    |       |
|----------|-------|-----------|----------|----|-------|
| aftexa5  | 10264 | -7.448071 | 2.000446 | -9 | 1     |
| aftexa6  | 10264 | -7.445635 | 2.0101   | -9 | 1     |
| aftexb   | 10264 | -7.414166 | 2.12854  | -9 | 7     |
| aftexb1  | 10264 | -7.960249 | .7940992 | -9 | 1     |
| aftexb2  | 10264 | -7.960639 | .7899359 | -9 | 1     |
| -----    |       |           |          |    |       |
| aftexb3  | 10264 | -7.959762 | .7937679 | -9 | 1     |
| aftexb4  | 10264 | -7.954988 | .8326386 | -9 | 1     |
| aftexb5  | 10264 | -7.961224 | .783649  | -9 | 1     |
| aftexb6  | 10264 | -7.959178 | .8054365 | -9 | 1     |
| aftexc   | 10264 | -7.435016 | 2.029276 | -9 | 6     |
| -----    |       |           |          |    |       |
| aftexc1  | 10264 | -8.012763 | .5065418 | -9 | 1     |
| aftexc2  | 10264 | -8.013153 | .4999488 | -9 | 0     |
| aftexc3  | 10264 | -8.011984 | .5109658 | -9 | 1     |
| aftexc4  | 10264 | -8.011886 | .5210702 | -9 | 1     |
| aftexc5  | 10264 | -8.013153 | .4999488 | -9 | 0     |
| -----    |       |           |          |    |       |
| aftexc6  | 10264 | -8.012568 | .5098063 | -9 | 1     |
| axpself  | 10264 | 16.17712  | 22.7109  | -9 | 620   |
| aspinhh  | 10264 | 1.350546  | .488266  | -9 | 2     |
| ahubuys  | 10264 | -1.66251  | 4.886941 | -9 | 4     |
| ahufrys  | 10264 | -1.848889 | 4.735307 | -9 | 4     |
| -----    |       |           |          |    |       |
| ahumops  | 10264 | -1.761886 | 4.820282 | -9 | 4     |
| ahuiro   | 10264 | -1.905398 | 4.696863 | -9 | 4     |
| ahhch12  | 10264 | -1.937646 | 4.647426 | -9 | 2     |
| ahusits  | 10264 | -5.789069 | 4.123499 | -9 | 4     |
| ahuruns  | 10264 | -.7277864 | 5.743124 | -9 | 7     |
| -----    |       |           |          |    |       |
| ahuboss  | 10264 | -1.409002 | 5.07476  | -9 | 4     |
| ahupays  | 10264 | -1.872564 | 4.72289  | -9 | 4     |
| ahukeep  | 10264 | -1.899649 | 4.694409 | -9 | 4     |
| ahuasks  | 10264 | -1.625779 | 4.908632 | -9 | 4     |
| ahushop  | 10264 | -6.109217 | 3.874512 | -9 | 3     |
| -----    |       |           |          |    |       |
| ahucook  | 10264 | -6.10795  | 3.876371 | -9 | 3     |
| ahudust  | 10264 | -6.083009 | 3.930226 | -9 | 3     |
| ahuwash  | 10264 | -6.098305 | 3.898995 | -9 | 3     |
| adriver  | 10264 | 1.038971  | 1.637296 | -9 | 2     |
| acaruse  | 10264 | -2.217849 | 4.351963 | -9 | 2     |
| -----    |       |           |          |    |       |
| acarowr  | 10264 | -2.542381 | 4.653036 | -9 | 4     |
| acarowrp | 10264 | -7.022993 | 2.814901 | -9 | 6     |
| acarjob  | 10264 | -7.535074 | 1.94295  | -9 | 2     |
| acarval  | 10264 | 1721.245  | 3536.125 | -9 | 99997 |
| aivfa    | 10264 | .2484412  | 1.463728 | -9 | 1     |
| -----    |       |           |          |    |       |
| aivfb    | 10264 | .0381917  | 1.411559 | -9 | 1     |
| aivfc    | 10264 | -.0732658 | 1.370081 | -9 | 1     |
| aivfd    | 10264 | -.1498441 | 1.335458 | -9 | 1     |
| aivfoih  | 10264 | 15.74766  | 4.233633 | -9 | 23    |
| aivfoim  | 10264 | 27.8105   | 17.74487 | -9 | 59    |
| -----    |       |           |          |    |       |
| aivsc    | 10264 | .6941738  | 1.838639 | -9 | 4     |
| aiv1     | 10264 | 1.048227  | 1.916485 | -9 | 2     |
| aiv2     | 10264 | -1.637276 | 5.927627 | -9 | 4     |
| aiv4     | 10264 | 1.069758  | 1.540643 | -9 | 5     |
| aiv5     | 10264 | .6363991  | 2.166891 | -9 | 3     |
| -----    |       |           |          |    |       |
| aiv6a    | 10264 | 1.372272  | 2.397312 | -9 | 2     |
| aiv6b    | 10264 | 1.364867  | 2.394669 | -9 | 2     |
| aiv6c    | 10264 | 1.369544  | 2.403863 | -9 | 2     |
| aiv6d    | 10264 | 1.373246  | 2.401831 | -9 | 2     |
| aiv6e    | 10264 | 1.372175  | 2.421772 | -9 | 2     |
| -----    |       |           |          |    |       |
| aiv6f    | 10264 | .7483437  | 3.397573 | -9 | 2     |
| aiv7     | 10264 | -7.992985 | .8250142 | -9 | 5     |
| aghqa    | 10264 | 1.647896  | 2.261254 | -9 | 4     |
| aghqb    | 10264 | 1.302514  | 2.252581 | -9 | 4     |
| aghqc    | 10264 | 1.530982  | 2.273044 | -9 | 4     |
| -----    |       |           |          |    |       |
| aghqd    | 10264 | 1.467362  | 2.205312 | -9 | 4     |



|          |       |           |          |          |          |
|----------|-------|-----------|----------|----------|----------|
| aghqe    | 10264 | 1.55115   | 2.311492 | -9       | 4        |
| aghqf    | 10264 | 1.256333  | 2.245235 | -9       | 4        |
| aghqg    | 10264 | 1.620908  | 2.259109 | -9       | 4        |
| aghqh    | 10264 | 1.526403  | 2.21144  | -9       | 4        |
| -----    |       |           |          |          |          |
| aghqi    | 10264 | 1.358145  | 2.274144 | -9       | 4        |
| aghqj    | 10264 | 1.070246  | 2.288386 | -9       | 4        |
| aghqk    | 10264 | .8379774  | 2.227086 | -9       | 4        |
| aghql    | 10264 | 1.458009  | 2.332698 | -9       | 4        |
| aopfama  | 10264 | 1.986847  | 2.767048 | -9       | 5        |
| -----    |       |           |          |          |          |
| aopfamb  | 10264 | 2.259353  | 2.752155 | -9       | 5        |
| aopfamc  | 10264 | 2.455475  | 2.757037 | -9       | 5        |
| aopfamd  | 10264 | 1.803196  | 2.620802 | -9       | 5        |
| aopfame  | 10264 | 2.06138   | 2.696065 | -9       | 5        |
| aopfamf  | 10264 | 2.644875  | 2.890488 | -9       | 5        |
| -----    |       |           |          |          |          |
| aopfamg  | 10264 | 1.218726  | 2.403632 | -9       | 5        |
| aopfamh  | 10264 | 1.451481  | 2.527484 | -9       | 5        |
| aopfami  | 10264 | 2.327065  | 2.805373 | -9       | 5        |
| assupa   | 10264 | 1.13221   | 2.325161 | -9       | 3        |
| assupb   | 10264 | 1.162217  | 2.341349 | -9       | 3        |
| -----    |       |           |          |          |          |
| assupc   | 10264 | 1.137666  | 2.371649 | -9       | 3        |
| assupd   | 10264 | 1.185795  | 2.418358 | -9       | 3        |
| assupe   | 10264 | 1.1212    | 2.379253 | -9       | 3        |
| assupl   | 10264 | .8909782  | 2.629645 | -9       | 2        |
| pid      | 10264 | 1.47e+07  | 2621806  | 1.00e+07 | 1.91e+07 |
| -----    |       |           |          |          |          |
| aivfio   | 10264 | 1.034295  | .1819938 | 1        | 2        |
| aiodc    | 10264 | 3.882892  | .518698  | 1        | 4        |
| axrwght  | 10264 | .9657047  | .3063235 | 0        | 2.499446 |
| axewght  | 10264 | 1.030037  | .2272673 | .21416   | 2.498486 |
| aregion  | 10264 | 8.331547  | 5.589891 | 1        | 18       |
| -----    |       |           |          |          |          |
| aprrs2i  | 10264 | -7.575701 | 2.394763 | -9       | 24       |
| apripn   | 10264 | -7.670012 | 1.755306 | -8       | 4        |
| aprwhy   | 10264 | -7.497759 | 2.742443 | -9       | 12       |
| aprfehq  | 10264 | -7.823071 | 1.709392 | -9       | 14       |
| aprsehq  | 10264 | -7.907833 | 1.249644 | -9       | 20       |
| -----    |       |           |          |          |          |
| aprfitb  | 10264 | -7.581742 | 2.313857 | -8       | 14       |
| aprbft   | 10264 | -7.788289 | 1.434427 | -8       | 2        |
| ahgr2r   | 10264 | 2.363309  | 3.477132 | 1        | 30       |
| amastat  | 10264 | 2.447584  | 2.013203 | 0        | 6        |
| ahgspn   | 10264 | .9809041  | .8480053 | -9       | 6        |
| -----    |       |           |          |          |          |
| ahgest   | 10264 | 2.050273  | 1.403773 | 0        | 6        |
| ahgfno   | 10264 | .1086321  | .3758618 | 0        | 9        |
| ahgmno   | 10264 | .2080086  | .5903592 | 0        | 5        |
| ahgjnlly | 10264 | .0231878  | .150507  | 0        | 1        |
| ahgmjn   | 10264 | -7.641952 | 2.372402 | -8       | 12       |
| -----    |       |           |          |          |          |
| ahgyjn   | 10264 | -7.794914 | 1.332308 | -8       | 1        |
| aage     | 10264 | 44.41553  | 18.45757 | 15       | 96       |
| aage12   | 10264 | 44.52445  | 18.46726 | 15       | 97       |
| abutype  | 10264 | 5.738796  | 5.048462 | 1        | 17       |
| abuno    | 10264 | 1.395168  | .7667199 | 1        | 7        |
| -----    |       |           |          |          |          |
| anchild  | 10264 | .5305924  | .9485649 | 0        | 9        |
| ahoh     | 10264 | 1.484217  | .4997752 | 1        | 2        |
| ahhsize  | 10264 | 2.875682  | 1.328796 | 1        | 11       |
| ahhtype  | 10264 | 3.884938  | 1.60103  | 1        | 9        |
| atenure  | 10264 | 2.367206  | 1.495161 | -9       | 8        |
| -----    |       |           |          |          |          |
| aqfedhi  | 10264 | 7.407151  | 4.387513 | -9       | 13       |
| aqfvoc   | 10264 | .0543648  | 1.462436 | -9       | 1        |
| aqfachi  | 10264 | 4.995616  | 2.8391   | -9       | 7        |
| ajbft    | 10264 | -2.741524 | 4.558724 | -9       | 2        |
| aedgen   | 10264 | 5.770752  | 38.5172  | -9       | 395      |
| -----    |       |           |          |          |          |
| aedspec  | 10264 | -1.242401 | 15.59855 | -9       | 368      |
| apargsc  | 10264 | 1.911925  | 4.296639 | -9       | 7        |

|          |       |            |          |    |          |
|----------|-------|------------|----------|----|----------|
| apaseg   | 10264 | 7.598305   | 7.692667 | -9 | 19       |
| apagold  | 10264 | 4.5303     | 6.064727 | -9 | 11       |
| apaisco  | 0     |            |          |    |          |
| apacssm  | 10264 | 22.08452   | 20.86485 | -9 | 88.35    |
| apacssf  | 10264 | 22.33945   | 21.38081 | -9 | 98.85    |
| apahgs   | 10264 | 36.64136   | 23.09744 | -9 | 82.05    |
| apasec   | 10264 | 79.9585    | 48.11002 | -9 | 135      |
| amargsc  | 10264 | -3.137763  | 5.853527 | -9 | 6        |
| amaseg   | 10264 | - .4666797 | 9.256964 | -9 | 18       |
| amagold  | 10264 | -2.148383  | 7.29881  | -9 | 11       |
| amaisco  | 0     |            |          |    |          |
| amacssm  | 10264 | 7.222916   | 20.84871 | -9 | 85.04    |
| amacssf  | 10264 | 7.35453    | 21.27978 | -9 | 87.85    |
| amahgs   | 10264 | 10.8767    | 24.46545 | -9 | 82.05    |
| amasec   | 10264 | 36.00283   | 56.8997  | -9 | 135      |
| apayg    | 10264 | 430.8814   | 693.2899 | -9 | 14010.78 |
| apayn    | 10264 | 318.1781   | 487.7025 | -9 | 8506.544 |
| apaygu   | 10264 | 460.2971   | 669.9315 | -8 | 8666.667 |
| apaynu   | 10264 | 341.6312   | 473.6067 | -8 | 7583.333 |
| apaygty  | 10264 | 536.6577   | 767.775  | -8 | 12600    |
| apaygly  | 10264 | 506.9312   | 734.5573 | -8 | 12600    |
| apaynty  | 10264 | 400.2391   | 538.3763 | -8 | 7796.37  |
| apaynly  | 10264 | 379.7157   | 512.3114 | -8 | 7796.37  |
| ajsprof  | 10264 | 47.3044    | 401.4754 | -8 | 8333.083 |
| ajspayg  | 10264 | 11.16522   | 190.1783 | -8 | 5500     |
| acjsten  | 10264 | 2523.956   | 3504.455 | -9 | 31679    |
| acjswk9  | 10264 | 42.57109   | 18.58437 | -9 | 52.14286 |
| ajlid    | 10264 | 3.186477   | 5.635741 | -9 | 12       |
| ajlyid   | 10264 | .0841777   | 1.524213 | -9 | 7        |
| ajtyid   | 10264 | - .2061574 | 1.338237 | -9 | 2        |
| ajbseg   | 10264 | 2.299786   | 8.929272 | -9 | 19       |
| ajbgold  | 10264 | - .1395168 | 6.949072 | -9 | 11       |
| ajbrgsc  | 10264 | -1.227104  | 5.630747 | -9 | 7        |
| ajbisco  | 0     |            |          |    |          |
| ajbcssm  | 10264 | 17.35542   | 24.7788  | -9 | 90.32    |
| ajbcssf  | 10264 | 17.77473   | 25.59084 | -9 | 98.85    |
| ajbhgs   | 10264 | 24.32088   | 29.07538 | -9 | 82.05    |
| ajbsec   | 10264 | 47.36078   | 53.16632 | -9 | 135      |
| anjbwks  | 10264 | 29.33252   | 25.27712 | -9 | 52.14286 |
| anjwks   | 10264 | 1.856141   | 9.226241 | -9 | 52.14286 |
| anjiwks  | 10264 | 17.72716   | 24.46681 | -9 | 52.14286 |
| anjbnw   | 10264 | .4208885   | 1.666942 | -9 | 7        |
| anjbsp   | 10264 | .455378    | 1.691424 | -9 | 7        |
| anjusp   | 10264 | - .1930047 | 1.459935 | -9 | 4        |
| anjisp   | 10264 | .1113601   | 1.56989  | -9 | 3        |
| ajbstatl | 10264 | 2.648578   | 2.623421 | -9 | 10       |
| ajbstatt | 10264 | 2.677708   | 2.449129 | -9 | 10       |
| ajbsocly | 10264 | 289.6033   | 319.1646 | -9 | 990      |
| ajlseg   | 10264 | -2.899357  | 8.317034 | -9 | 19       |
| ajlgold  | 10264 | -4.020265  | 6.597516 | -9 | 11       |
| ajlrgsc  | 10264 | -4.696804  | 5.295428 | -9 | 7        |
| ajlisco  | 0     |            |          |    |          |
| ajlcsm   | 10264 | 2.335206   | 18.65881 | -9 | 85.04    |
| ajlcssf  | 10264 | 2.451452   | 19.04769 | -9 | 97.7     |
| ajlhgs   | 10264 | 5.364433   | 22.7508  | -9 | 82.05    |
| ajlsec   | 10264 | 21.30729   | 50.44071 | -9 | 135      |
| avote    | 10264 | 1.917089   | 3.120254 | -9 | 11       |
| anorgm   | 10264 | .6427319   | 1.811676 | -9 | 8        |
| anorga   | 10264 | .4157249   | 1.692908 | -9 | 8        |
| afimnp   | 10264 | 31.50812   | 132.8808 | -7 | 3700     |
| afimnb   | 10264 | 94.3266    | 144.9553 | -7 | 2360.035 |

|           |       |           |          |    |          |
|-----------|-------|-----------|----------|----|----------|
| afimni    | 10264 | 27.81699  | 65.46242 | -7 | 1807.98  |
| afimnt    | 10264 | 7.339834  | 53.84561 | -7 | 1636     |
|           |       |           |          |    |          |
| afimnnl   | 10264 | 161.7117  | 233.1982 | -7 | 4125.438 |
| afimnl    | 10264 | 550.1555  | 774.1263 | -7 | 11247    |
| afimn     | 10264 | 712.1073  | 738.4903 | -7 | 11297    |
| afiyrl    | 10264 | 6238.044  | 8713.117 | -7 | 151316.4 |
| afiyrn    | 10264 | 1784.69   | 2640.597 | -7 | 49317.32 |
|           |       |           |          |    |          |
| afiyrb    | 10264 | 365.9574  | 1555.503 | -7 | 44400    |
| afiyrb    | 10264 | 1018.587  | 1569.406 | -7 | 28005.78 |
| afiyrt    | 10264 | 70.97255  | 483.1657 | -7 | 16500    |
| afiyri    | 10264 | 328.4533  | 757.0254 | -7 | 21695.76 |
| afiy      | 10264 | 8022.974  | 8354.933 | -7 | 151376.4 |
|           |       |           |          |    |          |
| afihhm    | 10264 | 1683.471  | 1210.849 | 0  | 12703.16 |
| ahlg      | 10264 | 9.585834  | 6.590324 | -9 | 36       |
| ahlg      | 10264 | 1.108145  | 3.471884 | -9 | 12       |
| aspjb     | 10264 | -2.387081 | 4.151251 | -8 | 1        |
| aspsoc    | 10264 | 200.6833  | 297.9094 | -9 | 999      |
|           |       |           |          |    |          |
| aspjbhr   | 10264 | 9.46931   | 23.38504 | -9 | 97       |
| aspjbot   | 10264 | -4.075117 | 6.848858 | -9 | 76       |
| asppayg   | 10264 | 395.3786  | 728.7473 | -9 | 8666.667 |
| aspjbyr   | 10264 | -2.809528 | 4.336663 | -9 | 1        |
| ahlp      | 10264 | .1999221  | .6703416 | -9 | 1        |
|           |       |           |          |    |          |
| ahlp      | 10264 | .0437451  | .5755212 | -9 | 1        |
| ahlp      | 10264 | .0475448  | .5785134 | -9 | 1        |
| ahlp      | 10264 | .0731684  | .5976708 | -9 | 1        |
| ahlp      | 10264 | .0743375  | .5985041 | -9 | 1        |
| ahlp      | 10264 | .0882697  | .6081735 | -9 | 1        |
|           |       |           |          |    |          |
| ahlp      | 10264 | .0261107  | .5610886 | -9 | 1        |
| ahlp      | 10264 | -.0114965 | .5270287 | -9 | 1        |
| ahlp      | 10264 | .0225058  | .5580238 | -9 | 1        |
| ahlp      | 10264 | -.0248441 | .5137365 | -9 | 1        |
| ahlp      | 10264 | -.0222136 | .5164105 | -9 | 1        |
|           |       |           |          |    |          |
| ahlp      | 10264 | .0484217  | .5791982 | -9 | 1        |
| ahlp      | 10264 | .0211419  | .5568536 | -9 | 1        |
| aj2payi   | 10264 | -7.359704 | 2.098332 | -9 | 0        |
| afiyrdii  | 10264 | -.3370031 | 1.369669 | -9 | 0        |
| aprfitbi  | 10264 | -7.739088 | 1.399297 | -9 | 0        |
|           |       |           |          |    |          |
| apaygui   | 10264 | -3.887666 | 4.028248 | -8 | 1        |
| apaynui   | 10264 | -3.887666 | 4.028248 | -8 | 1        |
| apaygti   | 10264 | -3.288581 | 4.001403 | -8 | 1        |
| apaygli   | 10264 | -3.275331 | 4.026995 | -8 | 1        |
| apaynti   | 10264 | -3.288581 | 4.001403 | -8 | 1        |
|           |       |           |          |    |          |
| apaynli   | 10264 | -3.275331 | 4.026995 | -8 | 1        |
| ajsp      | 10264 | -7.516076 | 1.906602 | -8 | 1        |
| ajsp      | 10264 | -7.779326 | 1.24411  | -8 | 1        |
| afimnpi   | 10264 | .0145168  | .1196136 | 0  | 1        |
| afimnbi   | 10264 | .0749221  | .2632784 | 0  | 1        |
|           |       |           |          |    |          |
| afimnii   | 10264 | .0531956  | .2244343 | 0  | 1        |
| afimnti   | 10264 | .0078917  | .0884881 | 0  | 1        |
| afimnnli  | 10264 | .1274357  | .3334766 | 0  | 1        |
| afimnli   | 10264 | .0961613  | .2948267 | 0  | 1        |
| afimnthi  | 10264 | .1996298  | .3997415 | 0  | 1        |
|           |       |           |          |    |          |
| afiyarli  | 10264 | .1316251  | .3380992 | 0  | 1        |
| afiyarnli | 10264 | .1274357  | .3334766 | 0  | 1        |
| afiyrpi   | 10264 | .0145168  | .1196136 | 0  | 1        |
| afiyrb    | 10264 | .0749221  | .2632784 | 0  | 1        |
| afiyrti   | 10264 | .0078917  | .0884881 | 0  | 1        |
|           |       |           |          |    |          |
| afiyrii   | 10264 | .0531956  | .2244343 | 0  | 1        |
| afiyeari  | 10264 | .2320733  | .4221761 | 0  | 1        |
| asppaygi  | 10264 | -4.5341   | 4.030843 | -8 | 1        |
| afihhmni  | 10264 | .5366329  | .7110044 | 0  | 2        |

|          |       |           |          |    |          |
|----------|-------|-----------|----------|----|----------|
| amrjend  | 10264 | 660.0942  | 939.1094 | -9 | 1991     |
| amrjsoc  | 10264 | 506.0646  | 277.6694 | -9 | 999      |
| amrjsic  | 10264 | 6187.138  | 2997.786 | -9 | 9900     |
| amrjsemp | 10264 | .756138   | 1.486652 | -9 | 2        |
| amrjboss | 10264 | -6.768706 | 3.048008 | -9 | 2        |
| amrjmngr | 10264 | .9606391  | 3.658443 | -9 | 3        |
| amrjsize | 10264 | 3.169525  | 4.897279 | -9 | 11       |
| amrjseg  | 10264 | 8.642927  | 4.976651 | -9 | 19       |
| amrjgold | 10264 | 4.852981  | 4.184519 | -9 | 11       |
| amrjrgsc | 10264 | 2.950019  | 2.385063 | -9 | 7        |
| amrjisco | 0     |           |          |    |          |
| amrjcsm  | 10264 | 29.97464  | 19.0318  | -9 | 90.32    |
| amrjcsmf | 10264 | 30.53341  | 20.04758 | -9 | 98.85    |
| amrjhgs  | 10264 | 40.63562  | 19.17798 | -9 | 82.05    |
| amrjsec  | 10264 | 82.83466  | 41.73627 | -9 | 135      |
| aplnowy4 | 10264 | 1874.817  | 445.1769 | -9 | 1997     |
| ayr2uk4  | 10264 | 121.9103  | 489.6697 | -9 | 1991     |
| ajbbgy4  | 10264 | 994.5073  | 997.2332 | -9 | 1991     |
| ajsprby4 | 10264 | 45.94768  | 323.7306 | -9 | 1991     |
| ajsprey4 | 10264 | 45.77894  | 323.3183 | -9 | 1991     |
| ajspyby4 | 10264 | 22.01198  | 242.9086 | -9 | 1991     |
| ajspyey4 | 10264 | 22.21989  | 243.7901 | -9 | 1991     |
| ajsbgy4  | 10264 | 141.4012  | 524.505  | -8 | 1991     |
| acjsbgy4 | 10264 | 1869.566  | 463.6138 | -9 | 1991     |
| ajlend4  | 10264 | 547.1345  | 891.4674 | -9 | 1991     |
| asppid   | 10264 | 9545845   | 7330452  | -9 | 1.91e+07 |
| afpid    | 10264 | 1346566   | 4298273  | 0  | 1.91e+07 |
| ampid    | 10264 | 1775873   | 4871118  | 0  | 1.91e+07 |
| aregion2 | 10264 | 6.056703  | 3.012252 | 1  | 11       |
| aisced   | 10264 | 2.556313  | 2.450155 | -7 | 7        |
| acasmin  | 10264 | 3.662705  | 3.468182 | -7 | 9        |
| ajbiscon | 10264 | 2881.803  | 3063.079 | -9 | 9333     |
| ajliscon | 10264 | 1554.627  | 2845.764 | -9 | 9333     |
| amrjiscn | 10264 | 4760.167  | 2770.738 | -9 | 9333     |
| amaiscon | 10264 | 2285.447  | 3196.094 | -9 | 9333     |
| apaiscon | 10264 | 4775.975  | 3384.477 | -9 | 9333     |

```
.
. * Alternative method
. use ahid pid asex amastat aage aqfachi alknbrd apaygu ///
> using "$datadir\aindresp", clear
```

```
.
. * 3.3. Inspecting and recoding variables
. *-----
.
. list in 1/20
```

|     | ahid    | alknbrd  | asex   | pid      | amastat  | aage | aqfachi  | apaygu    |
|-----|---------|----------|--------|----------|----------|------|----------|-----------|
| 1.  | 1000209 | yes      | female | 10002251 | never ma | 91   | none of  | inapplica |
| 2.  | 1000381 | yes      | male   | 10004491 | never ma | 28   | 1st degr | inapplica |
| 3.  | 1000381 | yes      | male   | 10004521 | never ma | 26   | 1st degr | inapplica |
| 4.  | 1000667 | no       | female | 10007857 | widowed  | 57   | o level  | 780       |
| 5.  | 1001221 | yes      | female | 10014578 | married  | 54   | none of  | inapplica |
| 6.  | 1001221 | yes      | male   | 10014608 | married  | 57   | higher d | 3302.541  |
| 7.  | 1001418 | yes      | male   | 10016813 | married  | 36   | o level  | inapplica |
| 8.  | 1001418 | proxy re | female | 10016848 | married  | 32   | proxy re | proxy res |
| 9.  | 1001507 | yes      | female | 10017933 | married  | 49   | 1st degr | inapplica |
| 10. | 1001507 | yes      | male   | 10017968 | married  | 46   | 1st degr | 1541.667  |
| 11. | 1001604 | yes      | female | 10019057 | never ma | 59   | none of  | inapplica |
| 12. | 1001698 | yes      | male   | 10020179 | divorced | 52   | none of  | inapplica |
| 13. | 1001698 | yes      | female | 10020209 | divorced | 50   | none of  | 862.3333  |

|     |         |          |        |          |          |    |          |           |
|-----|---------|----------|--------|----------|----------|----|----------|-----------|
| 14. | 1001698 | yes      | male   | 10020233 | never ma | 19 | o level  | inapplica |
| 15. | 1001973 | yes      | female | 10023526 | never ma | 38 | none of  | 845       |
| 16. | 1001973 | yes      | male   | 10023569 | never ma | 35 | o level  | inapplica |
| 17. | 1002066 | yes      | male   | 10024646 | never ma | 25 | a level  | 600.4619  |
| 18. | 1002163 | yes      | male   | 10025766 | never ma | 24 | hnd,hnc, | inapplica |
| 19. | 1002163 | proxy re | male   | 10025804 | never ma | 28 | proxy re | proxy res |
| 20. | 1002341 | yes      | male   | 10028005 | never ma | 30 | o level  | 1501.155  |

. describe

Contains data from S:\final\aindresp.dta  
 obs: 10,264  
 vars: 8  
 size: 174,488

| variable name | storage type | display format | value label | variable label                         |
|---------------|--------------|----------------|-------------|----------------------------------------|
| ahid          | long         | %12.0g         |             | household identification number        |
| alknbrd       | byte         | %8.0g          | alknbrd     | likes present neighbourhood            |
| asex          | byte         | %8.0g          | asex        | sex                                    |
| pid           | long         | %12.0g         |             | cross-wave person identifier           |
| amastat       | byte         | %8.0g          | amastat     | marital status                         |
| aage          | byte         | %8.0g          | aage        | age at date of interview               |
| aqfachi       | byte         | %8.0g          | aqfachi     | highest academic qualification         |
| apaygu        | float        | %9.0g          | apaygu      | usual gross pay per month: current job |

Sorted by:

. sum

| Variable | Obs   | Mean     | Std. Dev. | Min      | Max      |
|----------|-------|----------|-----------|----------|----------|
| ahid     | 10264 | 1394265  | 218523    | 1000209  | 1761811  |
| alknbrd  | 10264 | .8058262 | 1.517382  | -9       | 2        |
| asex     | 10264 | 1.529131 | .499175   | 1        | 2        |
| pid      | 10264 | 1.47e+07 | 2621806   | 1.00e+07 | 1.91e+07 |
| amastat  | 10264 | 2.447584 | 2.013203  | 0        | 6        |
| aage     | 10264 | 44.41553 | 18.45757  | 15       | 96       |
| aqfachi  | 10264 | 4.995616 | 2.8391    | -9       | 7        |
| apaygu   | 10264 | 460.2971 | 669.9315  | -8       | 8666.667 |

. codebook

ahid  
household identification number

```

type: numeric (long)

range: [1000209,1761811]      units: 1
unique values: 5505          missing.: 0/10264

mean: 1.4e+06
std. dev: 218523

percentiles:    10%    25%    50%    75%    90%
                1.1e+06 1.2e+06 1.4e+06 1.6e+06 1.7e+06

```

alknbrd  
likes present neighbourhood

```

-----
type:  numeric (byte)
label:  alknbrd

range:  [-9,2]                units:  1
unique values:  5             missing .:  0/10264

tabulation:  Freq.  Numeric  Label
              3        -9  missing or wild
              352       -7  proxy respondent
              56        -1  don't know
             8888         1  yes
              965         2  no

```

```

-----
asex
sex
-----

```

```

type:  numeric (byte)
label:  asex

range:  [1,2]                units:  1
unique values:  2             missing .:  0/10264

tabulation:  Freq.  Numeric  Label
              4833         1  male
              5431         2  female

```

```

-----
pid
cross-wave person identifier
-----

```

```

type:  numeric (long)

range:  [10002251,19140509]  units:  1
unique values:  10264         missing .:  0/10264

mean:  1.5e+07
std. dev:  2.6e+06

percentiles:      10%      25%      50%      75%      90%
                  1.1e+07  1.2e+07  1.5e+07  1.7e+07  1.8e+07

```

```

-----
amastat
marital status
-----

```

```

type:  numeric (byte)
label:  amastat

range:  [0,6]                units:  1
unique values:  7             missing .:  0/10264

tabulation:  Freq.  Numeric  Label
              11         0  under 16 years
             6009         1  married
              674         2  living as couple
              866         3  widowed
              434         4  divorced
              189         5  separated
             2081         6  never married

```

-----  
-----  
aage  
age at date of interview  
-----  
-----

type: numeric (byte)  
label: aage, but 81 nonmissing values are not labeled  
  
range: [15,96] units: 1  
unique values: 81 missing .: 0/10264  
  
examples: 27  
37  
47  
63

-----  
-----  
aqfachi  
highest academic qualification  
-----  
-----

type: numeric (byte)  
label: aqfachi  
  
range: [-9,7] units: 1  
unique values: 9 missing .: 0/10264  
  
tabulation: Freq. Numeric Label  
19 -9 missing  
352 -7 proxy respondent  
122 1 higher degree  
598 2 1st degree  
496 3 hnd,hnc,teaching  
1362 4 a level  
2510 5 o level  
529 6 cse  
4276 7 none of these

-----  
-----  
apaygu  
usual gross pay per month: current job  
-----  
-----

type: numeric (float)  
label: apaygu, but 1687 nonmissing values are not labeled  
  
range: [-8,8666.667] units: 1.000e-06  
unique values: 1689 missing .: 0/10264  
  
examples: -8 inapplicable  
-8 inapplicable  
364.51642  
958.73749

. labelbook

-----  
-----  
value label aage  
-----  
-----

| values         | labels                     |
|----------------|----------------------------|
| range: [-9,-8] | string length: [15,15]     |
| N: 2           | unique at full length: yes |
| gaps: no       | unique at length 12: yes   |
| missing .*: 0  | null string: no            |

```

                                leading/trailing blanks: yes
                                numeric -> numeric: no
definition
  -9 missing or wild
  -8 inapplicable

variables: aage

```

-----

value label alknbrd

-----

```

values                                labels
range: [-9,2]                        string length: [7,23]
N: 7                                unique at full length: yes
gaps: yes                            unique at length 12: yes
missing .*: 0                        null string: no
                                leading/trailing blanks: yes
                                numeric -> numeric: no
definition
  -9 missing or wild
  -8 inapplicable
  -7 proxy respondent
  -2 refused
  -1 don't know
  1 yes
  2 no

variables: alknbrd

```

-----

value label amastat

-----

```

values                                labels
range: [-9,6]                        string length: [7,23]
N: 9                                unique at full length: yes
gaps: yes                            unique at length 12: yes
missing .*: 0                        null string: no
                                leading/trailing blanks: yes
                                numeric -> numeric: no
definition
  -9 missing or wild
  -8 inapplicable
  0 under 16 years
  1 married
  2 living as couple
  3 widowed
  4 divorced
  5 separated
  6 never married

variables: amastat

```

-----

value label apaygu

-----

```

values                                labels
range: [-9,-7]                      string length: [15,23]
N: 3                                unique at full length: yes
gaps: no                            unique at length 12: yes
missing .*: 0                        null string: no
                                leading/trailing blanks: yes

```



```

                                numeric -> numeric:  no
definition
    -9  missing or wild
    -8  inapplicable
    -7  proxy respondent

variables:  apaygu

```

```

-----
value label aqfachi
-----

```

```

values                                labels
range:  [-9,7]                        string length:  [7,23]
N:      10                            unique at full length:  yes
gaps:   yes                           unique at length 12:  yes
missing .*: 0                          null string:      no
                                leading/trailing blanks:  yes
                                numeric -> numeric:  no

```

```

definition
    -9  missing
    -8  proxy
    -7  proxy respondent
    1   higher degree
    2   1st degree
    3   hnd,hnc,teaching
    4   a level
    5   o level
    6   cse
    7   none of these

```

```

variables:  aqfachi

```

```

-----
value label asex
-----

```

```

values                                labels
range:  [-9,2]                        string length:  [7,15]
N:      4                            unique at full length:  yes
gaps:   yes                           unique at length 12:  yes
missing .*: 0                          null string:      no
                                leading/trailing blanks:  yes
                                numeric -> numeric:  no

```

```

definition
    -9  missing or wild
    -8  inapplicable
    1   male
    2   female

```

```

variables:  asex

```

```

.
. tabulate asex

```

| sex    | Freq.  | Percent | Cum.   |
|--------|--------|---------|--------|
| male   | 4,833  | 47.09   | 47.09  |
| female | 5,431  | 52.91   | 100.00 |
| Total  | 10,264 | 100.00  |        |

```

. tabulate asex, nolabel

```

| sex | Freq. | Percent | Cum. |
|-----|-------|---------|------|
|-----|-------|---------|------|

|       |        |        |        |
|-------|--------|--------|--------|
| 1     | 4,833  | 47.09  | 47.09  |
| 2     | 5,431  | 52.91  | 100.00 |
| <hr/> |        |        |        |
| Total | 10,264 | 100.00 |        |

. tabulate alknbrd

|                  | likes present<br>neighbourhood | Freq.  | Percent | Cum.   |
|------------------|--------------------------------|--------|---------|--------|
| <hr/>            |                                |        |         |        |
| proxy respondent | missing or wild                | 3      | 0.03    | 0.03   |
|                  |                                | 352    | 3.43    | 3.46   |
|                  | don't know                     | 56     | 0.55    | 4.00   |
|                  | yes                            | 8,888  | 86.59   | 90.60  |
|                  | no                             | 965    | 9.40    | 100.00 |
| <hr/>            |                                |        |         |        |
|                  | Total                          | 10,264 | 100.00  |        |

. tabulate alknbrd, nolabel

|       | likes<br>present<br>neighbourhood | Freq.  | Percent | Cum.   |
|-------|-----------------------------------|--------|---------|--------|
| <hr/> |                                   |        |         |        |
|       | -9                                | 3      | 0.03    | 0.03   |
|       | -7                                | 352    | 3.43    | 3.46   |
|       | -1                                | 56     | 0.55    | 4.00   |
|       | 1                                 | 8,888  | 86.59   | 90.60  |
|       | 2                                 | 965    | 9.40    | 100.00 |
| <hr/> |                                   |        |         |        |
|       | Total                             | 10,264 | 100.00  |        |

. numlabel \_all, add

. tabulate asex

|       | sex       | Freq.  | Percent | Cum.   |
|-------|-----------|--------|---------|--------|
| <hr/> |           |        |         |        |
|       | 1. male   | 4,833  | 47.09   | 47.09  |
|       | 2. female | 5,431  | 52.91   | 100.00 |
| <hr/> |           |        |         |        |
|       | Total     | 10,264 | 100.00  |        |

. tabulate alknbrd

|                      | likes present neighbourhood | Freq.  | Percent | Cum.   |
|----------------------|-----------------------------|--------|---------|--------|
| <hr/>                |                             |        |         |        |
| -7. proxy respondent | -9. missing or wild         | 3      | 0.03    | 0.03   |
|                      |                             | 352    | 3.43    | 3.46   |
|                      | -1. don't know              | 56     | 0.55    | 4.00   |
|                      | 1. yes                      | 8,888  | 86.59   | 90.60  |
|                      | 2. no                       | 965    | 9.40    | 100.00 |
| <hr/>                |                             |        |         |        |
|                      | Total                       | 10,264 | 100.00  |        |

. numlabel \_all, remove

. tabulate asex

|       | sex    | Freq.  | Percent | Cum.   |
|-------|--------|--------|---------|--------|
| <hr/> |        |        |         |        |
|       | male   | 4,833  | 47.09   | 47.09  |
|       | female | 5,431  | 52.91   | 100.00 |
| <hr/> |        |        |         |        |
|       | Total  | 10,264 | 100.00  |        |

. tabulate alknbrd

|  | likes present<br>neighbourhood | Freq. | Percent | Cum. |
|--|--------------------------------|-------|---------|------|
|--|--------------------------------|-------|---------|------|

|                  |        |        |        |
|------------------|--------|--------|--------|
| missing or wild  | 3      | 0.03   | 0.03   |
| proxy respondent | 352    | 3.43   | 3.46   |
| don't know       | 56     | 0.55   | 4.00   |
| yes              | 8,888  | 86.59  | 90.60  |
| no               | 965    | 9.40   | 100.00 |
| Total            | 10,264 | 100.00 |        |

```
.
. sum alknbrd, detail
```

| likes present neighbourhood |    |          |             |           |
|-----------------------------|----|----------|-------------|-----------|
| Percentiles                 |    | Smallest |             |           |
| 1%                          | -7 | -9       |             |           |
| 5%                          | 1  | -9       |             |           |
| 10%                         | 1  | -9       | Obs         | 10264     |
| 25%                         | 1  | -7       | Sum of Wgt. | 10264     |
| 50%                         | 1  |          | Mean        | .8058262  |
|                             |    | Largest  | Std. Dev.   | 1.517382  |
| 75%                         | 1  | 2        |             |           |
| 90%                         | 1  | 2        | Variance    | 2.302447  |
| 95%                         | 2  | 2        | Skewness    | -4.709848 |
| 99%                         | 2  | 2        | Kurtosis    | 24.57898  |

```
. inspect alknbrd
```

| alknbrd: likes present neighbourhood |   |          | Number of Observations |          |             |
|--------------------------------------|---|----------|------------------------|----------|-------------|
|                                      |   |          | Total                  | Integers | Nonintegers |
|                                      | # | Negative | 411                    | 411      | -           |
|                                      | # | Zero     | -                      | -        | -           |
|                                      | # | Positive | 9853                   | 9853     | -           |
|                                      | # |          | -----                  | -----    | -----       |
|                                      | # | Total    | 10264                  | 10264    | -           |
|                                      | # | Missing  | -                      |          |             |
| -----                                |   |          | -----                  |          |             |
| -9                                   | 2 |          | 10264                  |          |             |
| (5 unique values)                    |   |          |                        |          |             |

alknbrd is labeled and all values are documented in the label.

```
.
. recode alknbrd -9/-1 = .
(alknbrd: 411 changes made)

. mvdecode apaygu, mv(-9/-1)
apaygu: 5100 missing values generated
```

```
. sum apaygu
```

| Variable | Obs  | Mean     | Std. Dev. | Min      | Max      |
|----------|------|----------|-----------|----------|----------|
| apaygu   | 5164 | 922.7222 | 679.4844  | 8.666667 | 8666.667 |

```
. sum apaygu, detail
```

| usual gross pay per month: current job |          |          |             |          |
|----------------------------------------|----------|----------|-------------|----------|
| Percentiles                            |          | Smallest |             |          |
| 1%                                     | 52       | 8.666667 |             |          |
| 5%                                     | 120.0924 | 13       |             |          |
| 10%                                    | 182      | 13       | Obs         | 5164     |
| 25%                                    | 446.8177 | 17.33333 | Sum of Wgt. | 5164     |
| 50%                                    | 806.4282 |          | Mean        | 922.7222 |
|                                        |          | Largest  | Std. Dev.   | 679.4844 |
| 75%                                    | 1250     | 6004.619 |             |          |
| 90%                                    | 1734.334 | 7005.389 | Variance    | 461699.1 |
| 95%                                    | 2084.604 | 7505.774 | Skewness    | 1.99261  |
| 99%                                    | 3302.541 | 8666.667 | Kurtosis    | 12.8805  |

```
.
. sum alknbrd apaygu
```

| Variable | Obs  | Mean     | Std. Dev. | Min      | Max      |
|----------|------|----------|-----------|----------|----------|
| alknbrd  | 9853 | 1.09794  | .2972482  | 1        | 2        |
| apaygu   | 5164 | 922.7222 | 679.4844  | 8.666667 | 8666.667 |

```
.
. tabulate alknbrd asex
```

| likes present<br>neighbourhood | sex   |        | Total |
|--------------------------------|-------|--------|-------|
|                                | male  | female |       |
| yes                            | 4,150 | 4,738  | 8,888 |
| no                             | 419   | 546    | 965   |
| Total                          | 4,569 | 5,284  | 9,853 |

```
. tabulate alknbrd asex, col
```

| Key               |
|-------------------|
| frequency         |
| column percentage |

| likes present<br>neighbourhood | sex             |                 | Total           |
|--------------------------------|-----------------|-----------------|-----------------|
|                                | male            | female          |                 |
| yes                            | 4,150<br>90.83  | 4,738<br>89.67  | 8,888<br>90.21  |
| no                             | 419<br>9.17     | 546<br>10.33    | 965<br>9.79     |
| Total                          | 4,569<br>100.00 | 5,284<br>100.00 | 9,853<br>100.00 |

```
. tabulate alknbrd asex, row
```

| Key            |
|----------------|
| frequency      |
| row percentage |

| likes present<br>neighbourhood | sex            |                | Total           |
|--------------------------------|----------------|----------------|-----------------|
|                                | male           | female         |                 |
| yes                            | 4,150<br>46.69 | 4,738<br>53.31 | 8,888<br>100.00 |
| no                             | 419<br>43.42   | 546<br>56.58   | 965<br>100.00   |
| Total                          | 4,569<br>46.37 | 5,284<br>53.63 | 9,853<br>100.00 |

```
. tabulate alknbrd asex, col miss
```

| Key               |
|-------------------|
| frequency         |
| column percentage |

| likes present<br>neighbourhood | sex             |                 | Total            |
|--------------------------------|-----------------|-----------------|------------------|
|                                | male            | female          |                  |
| yes                            | 4,150<br>85.87  | 4,738<br>87.24  | 8,888<br>86.59   |
| no                             | 419<br>8.67     | 546<br>10.05    | 965<br>9.40      |
| .                              | 264<br>5.46     | 147<br>2.71     | 411<br>4.00      |
| Total                          | 4,833<br>100.00 | 5,431<br>100.00 | 10,264<br>100.00 |

```
.
. tabulate asex alknbrd, r chi2
```

|                |
|----------------|
| Key            |
| frequency      |
| row percentage |

| sex    | likes present<br>neighbourhood |              | Total           |
|--------|--------------------------------|--------------|-----------------|
|        | yes                            | no           |                 |
| male   | 4,150<br>90.83                 | 419<br>9.17  | 4,569<br>100.00 |
| female | 4,738<br>89.67                 | 546<br>10.33 | 5,284<br>100.00 |
| Total  | 8,888<br>90.21                 | 965<br>9.79  | 9,853<br>100.00 |

Pearson chi2(1) = 3.7486 Pr = 0.053

```
.
.
. * 3.4. Renaming, creating and labelling variables and values
. *-----
.
. rename alknbrd LikesNeighbourhood

. rename asex sex

.
. generate pay1 = 1 if apaygu <= 200
(9679 missing values generated)

. replace pay1 = 2 if apaygu > 200 & apaygu <= 400
(549 real changes made)

. replace pay1 = 3 if apaygu > 400 & apaygu < .
(4030 real changes made)

.
. * Alternative way:
. recode apaygu (0/200 = 1) (200/400 = 2) (400/max = 3), gen(pay2) test
(5164 differences between apaygu and pay2)
(transformation rules "overlapped")

. recode apaygu (0/200 = 1) (200.01/400 = 2) (400.01/max = 3), gen(pay3) test
(5164 differences between apaygu and pay3)

. tabulate pay2 pay3

RECODE of |
```

| apaygu<br>(usual<br>gross pay<br>per month:<br>current<br>job ) | RECODE of apaygu (usual gross<br>pay per month: current job ) |     |       | Total |
|-----------------------------------------------------------------|---------------------------------------------------------------|-----|-------|-------|
|                                                                 | 1                                                             | 2   | 3     |       |
| 1                                                               | 585                                                           | 0   | 0     | 585   |
| 2                                                               | 0                                                             | 549 | 0     | 549   |
| 3                                                               | 0                                                             | 0   | 4,030 | 4,030 |
| Total                                                           | 585                                                           | 549 | 4,030 | 5,164 |

```
. recode apaygu (0/200 = 1 low) (200.01/400 = 2 medium) ///
> (400.01/max = 3 high), gen(pay4) test
(5164 differences between apaygu and pay4)
```

```
. tabulate pay3 pay4
```

| RECODE of<br>apaygu<br>(usual<br>gross pay<br>per month:<br>current<br>job ) | RECODE of apaygu (usual gross<br>pay per month: current job ) |        |       | Total |
|------------------------------------------------------------------------------|---------------------------------------------------------------|--------|-------|-------|
|                                                                              | low                                                           | medium | high  |       |
| 1                                                                            | 585                                                           | 0      | 0     | 585   |
| 2                                                                            | 0                                                             | 549    | 0     | 549   |
| 3                                                                            | 0                                                             | 0      | 4,030 | 4,030 |
| Total                                                                        | 585                                                           | 549    | 4,030 | 5,164 |

```
.
. tabulate pay1
```

| pay1  | Freq. | Percent | Cum.   |
|-------|-------|---------|--------|
| 1     | 585   | 11.33   | 11.33  |
| 2     | 549   | 10.63   | 21.96  |
| 3     | 4,030 | 78.04   | 100.00 |
| Total | 5,164 | 100.00  |        |

```
. label define pay1_labels 1 "low" 2 "medium" 3 "high"
```

```
. label value pay1 pay1_labels
```

```
. tabulate pay1
```

| pay1   | Freq. | Percent | Cum.   |
|--------|-------|---------|--------|
| low    | 585   | 11.33   | 11.33  |
| medium | 549   | 10.63   | 21.96  |
| high   | 4,030 | 78.04   | 100.00 |
| Total  | 5,164 | 100.00  |        |

```
. label list pay1_labels
pay1_labels:
```

```
1 low
2 medium
3 high
```

```
. label var pay1 "Whether pay is low, medium, or high"
```

```
. generate highlypaid = (apaygu > 400 & apaygu < .)
```

```
. tabulate highlypaid
```

| highlypaid | Freq.  | Percent | Cum.   |
|------------|--------|---------|--------|
| 0          | 6,234  | 60.74   | 60.74  |
| 1          | 4,030  | 39.26   | 100.00 |
| Total      | 10,264 | 100.00  |        |

```
. xtile paidpctile = apaygu if apaygu < ., nq(5)
```

```
. tabulate paidpctile
```

| 5 quantiles | Freq. | Percent | Cum.   |
|-------------|-------|---------|--------|
| of apaygu   |       |         |        |
| 1           | 1,033 | 20.00   | 20.00  |
| 2           | 1,033 | 20.00   | 40.01  |
| 3           | 1,033 | 20.00   | 60.01  |
| 4           | 1,035 | 20.04   | 80.05  |
| 5           | 1,030 | 19.95   | 100.00 |
| Total       | 5,164 | 100.00  |        |

```
.
. egen MeanPay = mean(apaygu)

. egen MeanPayMen = mean(apaygu) if sex == 1
(5431 missing values generated)

. egen MeanPayWomen = mean(apaygu) if sex == 2
(4833 missing values generated)

. generate MeanPay2 = MeanPayMen if sex == 1
(5431 missing values generated)

. replace MeanPay2 = MeanPayWomen if sex == 2
(5431 real changes made)
```

```
.
. generate Men = 0 if sex == 2
(4833 missing values generated)
```

```
. replace Men = 1 if sex == 1
(4833 real changes made)
```

```
. generate Women = 0 if sex == 1
(5431 missing values generated)
```

```
. replace Women = 1 if sex == 2
(5431 real changes made)
```

```
. * Alternative way:
. tabulate sex, gen(Sex)
```

| sex    | Freq.  | Percent | Cum.   |
|--------|--------|---------|--------|
| male   | 4,833  | 47.09   | 47.09  |
| female | 5,431  | 52.91   | 100.00 |
| Total  | 10,264 | 100.00  |        |

```
.
. generate PersonId1 = pid
. generate double PersonId2 = pid
. list PersonId1 PersonId2 pid in 1/10
```

|    | Person~1 | Person~2 | pid      |
|----|----------|----------|----------|
| 1. | 1.00e+07 | 10002251 | 10002251 |
| 2. | 1.00e+07 | 10004491 | 10004491 |
| 3. | 1.00e+07 | 10004521 | 10004521 |

|       |          |          |          |
|-------|----------|----------|----------|
| 4.    | 1.00e+07 | 10007857 | 10007857 |
| 5.    | 1.00e+07 | 10014578 | 10014578 |
| ----- |          |          |          |
| 6.    | 1.00e+07 | 10014608 | 10014608 |
| 7.    | 1.00e+07 | 10016813 | 10016813 |
| 8.    | 1.00e+07 | 10016848 | 10016848 |
| 9.    | 1.00e+07 | 10017933 | 10017933 |
| 10.   | 1.00e+07 | 10017968 | 10017968 |

+-----+

```
.
* 3.5. Graphs: histograms and density plots
* NOTE THAT THE GRAPHS DO NOT SHOW IN THE LOG FILE
* YOU CAN FIND THEM IN CHAPTER 3
.
. set more on

.
. recode amastat (0 = .)
(amastat: 11 changes made)

. * Figure 3.10
. histogram amastat, discrete title(Histogram for Marital Status)
(start=1, width=1)

. more

. histogram amastat, discrete title(Histogram for Marital Status) scheme(slmanual)
(start=1, width=1)

. more

. * Figure 3.11
. histogram amastat, discrete title(Histogram for Marital Status) ///
> scheme(slmanual) by(sex)

. more

. * Figure 3.12
. histogram amastat, discrete xlabel(1(1)6, valuelabel angle(45)) ///
> scheme(slmanual) by(sex, title(Histogram for Marital Status))

. more

. histogram amastat, discrete title(Histogram for Marital Status) ///
> scheme(slmanual)
(start=1, width=1)

. more

. histogram amastat, discrete title(Histogram for Marital Status) ///
> scheme(slmanual) freq
(start=1, width=1)

. more

. histogram amastat, discrete xlabel(1(1)6, valuelabel angle(45)) ///
> scheme(slmanual) by(sex, title(Histogram for Marital Status)) ///
> saving("C:\My Documents\Graph1", replace)
(file C:\My Documents\Graph1.gph saved)

. more

. histogram apaygu, title(Histogram for Pay) scheme(slmanual)
(bin=37, start=8.666667, width=234.00001)

. more

. histogram apaygu, normal kdensity ///
> title(Histogram for Pay) legend(on) scheme(slmanual)
```



```

(bin=37, start=8.666667, width=234.00001)

. more

.
. * Figure 3.13
. histogram apaygu, scheme(s1manual) ///
>         normal normopts(lcolor(black) lpattern(solid)) ///
>         kdensity kdenopts(lcolor(black) lwidth(thick) lpattern(dash)) ///
>         title(Histogram for Pay) legend(on)
(bin=37, start=8.666667, width=234.00001)

. more

. kdensity apaygu, scheme(s1manual)

. more

. kdensity apaygu, normal scheme(s1manual)

. more

.
. * Figure 3.13
. kdensity apaygu, lcolor(black) lwidth(thick) lpattern(dash) ///
>         normal normopts(lcolor(black) lpattern(solid)) ///
>         scheme(s1manual)

.
. * 3.6 Clean Up and Save Datasets for Future Use
. drop pay2 pay3 pay4

. save DataChapter3.dta, replace
file DataChapter3.dta saved

.
.
. log close
      name:  <unnamed>
      log:   C:\My Documents\Example_Chapter3.log
      log type: text
      closed on: 29 Jul 2014, 17:08:01
-----
-----

```
