# Supplementary material
Source: publisher site journal article supplement (https://uk.sagepub.com/sites/default/files/upm-binaries/74511_AppendixC_LogFiles.zip)
Supplement: Supplementary file 5 [file 74511_AppendixC_LogFiles.zip]

```
*****
* A Practical Guide to Using Panel Data
* Simonetta Longhi and Alita Nandi
* ISER, University of Essex
* Chapter 10
*****
```

```
-----
name: <unnamed>
log: C:\My Documents\\Example_Chapter10.log
log type: text
opened on: 31 Jul 2014, 16:28:31

.
.
. * 10.2.1 Modelling Unobserved Heterogeneity
. *-----
.
. foreach w in m n o p q r {
2.      use `w'hid pid `w'sex `w'mastat `w'age `w'qfachi `w'region2 ///
>      `w'jbstat `w'memorig `w'lfsato ///
>      using "$datadir/\`w'indresp", clear
3.      renpfix `w'
4.      capture rename id pid
5.      gen wave = index("abcdefghijklmnopqr", "`w'")
6.      if indexnot("m", "`w'") append using temp
7.      save temp, replace
8. }
file temp.dta saved

. quietly mvdecode _all, mv(-9/-1)

.
. ** We create the same variables we created for Chapter 8, but now starting
. ** with the pooled dataset we created in Chapter 4
. recode jbstat (1 2 = 1) (3/10 = 0), gen(Employed)
(85846 differences between jbstat and Employed)

. label define Employed 1 "Employed/Self-Employed" 0 "Unemployed or Inactive"

. label value Employed Employed

.
. generate age2 = age*age
(4 missing values generated)

. label var age2 "age squared"

.
. generate Female = 1 if sex == 2
(43466 missing values generated)

. replace Female = 0 if sex == 1
(41372 real changes made)

. label var Female "Dummy for women"

.
. generate Married = 1 if mastat == 1 | mastat == 2 | mastat == 7
(33158 missing values generated)

. replace Married = 0 if (mastat >= 3 & mastat <= 6) | (mastat >= 8 & mastat < .)
(32894 real changes made)

. label var Married "Whether married or cohabiting"

.
```

```
. recode qfachi (1 = 2)
(qfachi: 2548 changes made)

. label define Q 2 "1st degree or higher" 3 "hnd,hnc,teaching" 4 "a level" ///
> 5 "o level" 6 "cse" 7 "none of these qualif", modify
```

```
.
. tabulate qfachi, gen(Q)
```

| highest academic<br>qualification | Freq.  | Percent | Cum.   |
|-----------------------------------|--------|---------|--------|
| 1st degree                        | 12,117 | 14.20   | 14.20  |
| hnd,hnc,teaching                  | 5,961  | 6.99    | 21.19  |
| a level                           | 16,890 | 19.79   | 40.98  |
| o level                           | 21,837 | 25.59   | 66.57  |
| cse                               | 4,137  | 4.85    | 71.42  |
| none of these                     | 24,386 | 28.58   | 100.00 |
| Total                             | 85,328 | 100.00  |        |

```
. label var Q1 "1st degree or higher"
```

```
. label var Q2 "hnd,hnc,teaching"
```

```
. label var Q3 "a level"
```

```
. label var Q4 "o level"
```

```
. label var Q5 "cse"
```

```
. label var Q6 "none of these qualif"
```

```
.
. tabulate region2, gen(R)
```

| government office<br>region | Freq.  | Percent | Cum.   |
|-----------------------------|--------|---------|--------|
| north east                  | 2,271  | 2.47    | 2.47   |
| north west                  | 6,509  | 7.07    | 9.54   |
| yorkshire & humber          | 4,994  | 5.43    | 14.97  |
| east midlands               | 4,424  | 4.81    | 19.78  |
| west midlands               | 4,518  | 4.91    | 24.69  |
| east of england             | 5,242  | 5.70    | 30.39  |
| london                      | 4,168  | 4.53    | 34.92  |
| south east                  | 7,350  | 7.99    | 42.90  |
| south west                  | 5,001  | 5.44    | 48.34  |
| wales                       | 16,148 | 17.55   | 65.89  |
| scotland                    | 16,276 | 17.69   | 83.58  |
| northern ireland            | 15,098 | 16.41   | 99.99  |
| channel islands             | 12     | 0.01    | 100.00 |
| Total                       | 92,011 | 100.00  |        |

```
. label var R1 "North East"
```

```
. label var R2 "North West"
```

```
. label var R3 "Yorkshire & Humber"
```

```
. label var R4 "East Midlands"
```

```
. label var R5 "West Midlands"
```

```
. label var R6 "East of England"
```

```
. label var R7 "London"
```

```
. label var R8 "South East"
```

```
. label var R9 "South West"
```

```

. label var R10 "Wales"

. label var R11 "Scotland"

. label var R12 "Northern Ireland"

.
. * Analysis sample
. keep if Female == 0
(50958 observations deleted)

. keep if Employed < . & age < . & Married < . & qfachi < . & region2 < 13
(3054 observations deleted)

.
. * define local macro of regressors
. local vlist c.age#c.age i.Married ib6.qfachi ib7.region2

```

```

.
.
. * 10.2.2 Pooled Estimations
. *-----
.
. regress Employed `vlist', vce(cluster pid)

```

```

Linear regression                                Number of obs =   38318
                                                F( 19, 8592) =  339.41
                                                Prob > F      =  0.0000
                                                R-squared     =  0.3964
                                                Root MSE     =  .37181

```

(Std. Err. adjusted for 8593 clusters in pid)

| Employed           | Coef.     | Robust Std. Err. | t      | P> t  | [95% Conf. Interval] |           |
|--------------------|-----------|------------------|--------|-------|----------------------|-----------|
| age                | .0432976  | .0012789         | 33.85  | 0.000 | .0407906             | .0458046  |
| c.age#c.age        | -.0005423 | .0000131         | -41.55 | 0.000 | -.0005679            | -.0005167 |
| 1.Married          | .1243932  | .0090452         | 13.75  | 0.000 | .1066624             | .1421241  |
| qfachi             |           |                  |        |       |                      |           |
| 1st degree         | .0268292  | .0174785         | 1.53   | 0.125 | -.0074329            | .0610912  |
| hnd,hnc,teaching   | -.0122428 | .0200328         | -0.61  | 0.541 | -.0515118            | .0270263  |
| a level            | -.0546138 | .0174002         | -3.14  | 0.002 | -.0887223            | -.0205053 |
| o level            | -.039106  | .0173034         | -2.26  | 0.024 | -.0730248            | -.0051872 |
| none of these      | -.1560469 | .0191383         | -8.15  | 0.000 | -.1935626            | -.1185312 |
| region2            |           |                  |        |       |                      |           |
| north east         | -.0510645 | .0281465         | -1.81  | 0.070 | -.1062384            | .0041094  |
| north west         | -.0337313 | .0216238         | -1.56  | 0.119 | -.0761191            | .0086565  |
| yorkshire & humber | -.0195999 | .0214729         | -0.91  | 0.361 | -.061692             | .0224921  |
| east midlands      | -.0261037 | .0228301         | -1.14  | 0.253 | -.0708562            | .0186487  |
| west midlands      | -.0045885 | .0232506         | -0.20  | 0.844 | -.0501653            | .0409883  |
| east of england    | -.0115997 | .0216967         | -0.53  | 0.593 | -.0541304            | .0309311  |
| south east         | .0031628  | .0201877         | 0.16   | 0.876 | -.03641              | .0427356  |
| south west         | .0123955  | .0214287         | 0.58   | 0.563 | -.0296099            | .0544009  |
| wales              | -.0536591 | .0187385         | -2.86  | 0.004 | -.0903911            | -.0169272 |
| scotland           | -.0301515 | .0183671         | -1.64  | 0.101 | -.0661553            | .0058524  |
| northern ireland   | -.0590176 | .0189569         | -3.11  | 0.002 | -.0961777            | -.0218575 |
| _cons              | -.0087148 | .0336781         | -0.26  | 0.796 | -.074732             | .0573024  |

```

. margins, dydx(*)

```

```

Average marginal effects                                Number of obs   =   38318
Model VCE      : Robust

```

```

Expression      : Linear prediction, predict()
dy/dx w.r.t.    : age 1.Married 2.qfachi 3.qfachi 4.qfachi 5.qfachi 7.qfachi 1.region2 2.region2
3.region2 4.region2 5.region2 6.region2 8.region2

```

|                    |                 | Delta-method |           | z      | P> z  | [95% Conf. Interval] |           |
|--------------------|-----------------|--------------|-----------|--------|-------|----------------------|-----------|
|                    |                 | dy/dx        | Std. Err. |        |       |                      |           |
|                    | age             | -.0066125    | .0002518  | -26.26 | 0.000 | -.0071059            | -.006119  |
|                    | 1.Married       | .1243932     | .0090452  | 13.75  | 0.000 | .1066649             | .1421216  |
|                    | qfachi          |              |           |        |       |                      |           |
|                    | 1st degree      | .0268292     | .0174785  | 1.53   | 0.125 | -.007428             | .0610864  |
| hnd,hnc,teaching   |                 | -.0122428    | .0200328  | -0.61  | 0.541 | -.0515063            | .0270208  |
|                    | a level         | -.0546138    | .0174002  | -3.14  | 0.002 | -.0887175            | -.0205101 |
|                    | o level         | -.039106     | .0173034  | -2.26  | 0.024 | -.07302              | -.005192  |
|                    | none of these   | -.1560469    | .0191383  | -8.15  | 0.000 | -.1935573            | -.1185365 |
|                    | region2         |              |           |        |       |                      |           |
|                    | north east      | -.0510645    | .0281465  | -1.81  | 0.070 | -.1062306            | .0041016  |
|                    | north west      | -.0337313    | .0216238  | -1.56  | 0.119 | -.0761131            | .0086505  |
| yorkshire & humber |                 | -.0195999    | .0214729  | -0.91  | 0.361 | -.0616861            | .0224862  |
|                    | east midlands   | -.0261037    | .0228301  | -1.14  | 0.253 | -.0708499            | .0186424  |
|                    | west midlands   | -.0045885    | .0232506  | -0.20  | 0.844 | -.0501588            | .0409819  |
|                    | east of england | -.0115997    | .0216967  | -0.53  | 0.593 | -.0541244            | .0309251  |
|                    | south east      | .0031628     | .0201877  | 0.16   | 0.876 | -.0364044            | .04273    |
|                    | south west      | .0123955     | .0214287  | 0.58   | 0.563 | -.029604             | .054395   |
|                    | wales           | -.0536591    | .0187385  | -2.86  | 0.004 | -.0903859            | -.0169324 |
|                    | scotland        | -.0301515    | .0183671  | -1.64  | 0.101 | -.0661502            | .0058473  |
| northern ireland   |                 | -.0590176    | .0189569  | -3.11  | 0.002 | -.0961724            | -.0218627 |

Note: dy/dx for factor levels is the discrete change from the base level.

. probit Employed `vlist', vce(cluster pid)

Iteration 0: log pseudolikelihood = -24921.244  
 Iteration 1: log pseudolikelihood = -15465.335  
 Iteration 2: log pseudolikelihood = -15264.514  
 Iteration 3: log pseudolikelihood = -15263.522  
 Iteration 4: log pseudolikelihood = -15263.522

Probit regression

|               |   |         |
|---------------|---|---------|
| Number of obs | = | 38318   |
| Wald chi2(19) | = | 2012.57 |
| Prob > chi2   | = | 0.0000  |
| Pseudo R2     | = | 0.3875  |

Log pseudolikelihood = -15263.522

(Std. Err. adjusted for 8593 clusters in pid)

|                    |                 | Robust    |           | z      | P> z  | [95% Conf. Interval] |           |
|--------------------|-----------------|-----------|-----------|--------|-------|----------------------|-----------|
|                    |                 | Coef.     | Std. Err. |        |       |                      |           |
|                    | Employed        |           |           |        |       |                      |           |
|                    | age             | .2072335  | .006876   | 30.14  | 0.000 | .1937567             | .2207102  |
|                    | c.age#c.age     | -.0026056 | .0000809  | -32.22 | 0.000 | -.0027641            | -.0024471 |
|                    | 1.Married       | .5042921  | .0382817  | 13.17  | 0.000 | .4292613             | .5793228  |
|                    | qfachi          |           |           |        |       |                      |           |
|                    | 1st degree      | .1426089  | .0847909  | 1.68   | 0.093 | -.0235781            | .308796   |
| hnd,hnc,teaching   |                 | .0028898  | .0941268  | 0.03   | 0.976 | -.1815953            | .187375   |
|                    | a level         | -.1819399 | .0781069  | -2.33  | 0.020 | -.3350267            | -.0288532 |
|                    | o level         | -.1016864 | .0787094  | -1.29  | 0.196 | -.2559541            | .0525812  |
|                    | none of these   | -.5285454 | .0834809  | -6.33  | 0.000 | -.692165             | -.3649259 |
|                    | region2         |           |           |        |       |                      |           |
|                    | north east      | -.2734279 | .1183877  | -2.31  | 0.021 | -.5054635            | -.0413922 |
|                    | north west      | -.1898539 | .0953062  | -1.99  | 0.046 | -.3766506            | -.0030572 |
| yorkshire & humber |                 | -.1160603 | .0946521  | -1.23  | 0.220 | -.301575             | .0694543  |
|                    | east midlands   | -.1873578 | .0991349  | -1.89  | 0.059 | -.3816587            | .0069431  |
|                    | west midlands   | -.0121379 | .1091465  | -0.11  | 0.911 | -.2260611            | .2017852  |
|                    | east of england | -.0465118 | .096344   | -0.48  | 0.629 | -.2353427            | .142319   |
|                    | south east      | .0527849  | .0948911  | 0.56   | 0.578 | -.1331982            | .238768   |
|                    | south west      | .0666554  | .1000958  | 0.67   | 0.505 | -.1295288            | .2628396  |
|                    | wales           | -.2215828 | .0830049  | -2.67  | 0.008 | -.3842693            | -.0588962 |
|                    | scotland        | -.1483138 | .0824146  | -1.80  | 0.072 | -.3098434            | .0132159  |





R-sq: within = 0.0406  
between = 0.4252  
overall = 0.3846

Obs per group: min = 1  
avg = 4.5  
max = 6

corr(u\_i, X) = 0 (assumed) Wald chi2(19) = 7737.69  
Prob > chi2 = 0.0000

| Employed           | Coef.     | Std. Err.                         | z      | P> z  | [95% Conf. Interval] |           |
|--------------------|-----------|-----------------------------------|--------|-------|----------------------|-----------|
| age                | .0476248  | .0009331                          | 51.04  | 0.000 | .045796              | .0494536  |
| c.age#c.age        | -.0005703 | 9.48e-06                          | -60.17 | 0.000 | -.0005889            | -.0005518 |
| 1.Married          | .0665866  | .0059779                          | 11.14  | 0.000 | .0548701             | .078303   |
| qfachi             |           |                                   |        |       |                      |           |
| 1st degree         | .1275431  | .0176437                          | 7.23   | 0.000 | .0929621             | .1621242  |
| hnd,hnc,teaching   | .0195629  | .0196935                          | 0.99   | 0.321 | -.0190355            | .0581614  |
| a level            | -.0526734 | .0165123                          | -3.19  | 0.001 | -.085037             | -.0203099 |
| o level            | -.0672662 | .0164302                          | -4.09  | 0.000 | -.0994689            | -.0350635 |
| none of these      | -.155294  | .0174149                          | -8.92  | 0.000 | -.1894266            | -.1211613 |
| region2            |           |                                   |        |       |                      |           |
| north east         | -.0407373 | .0250376                          | -1.63  | 0.104 | -.0898101            | .0083355  |
| north west         | -.0417252 | .0191834                          | -2.18  | 0.030 | -.0793239            | -.0041265 |
| yorkshire & humber | -.0312415 | .0199062                          | -1.57  | 0.117 | -.0702569            | .007774   |
| east midlands      | -.0223575 | .0201949                          | -1.11  | 0.268 | -.0619388            | .0172238  |
| west midlands      | -.0303487 | .0207301                          | -1.46  | 0.143 | -.0709789            | .0102814  |
| east of england    | -.013134  | .019292                           | -0.68  | 0.496 | -.0509456            | .0246777  |
| south east         | .0135225  | .017739                           | 0.76   | 0.446 | -.0212452            | .0482902  |
| south west         | .0108219  | .0196866                          | 0.55   | 0.583 | -.0277632            | .049407   |
| wales              | -.0521529 | .0167853                          | -3.11  | 0.002 | -.0850513            | -.0192544 |
| scotland           | -.0360784 | .0166034                          | -2.17  | 0.030 | -.0686205            | -.0035363 |
| northern ireland   | -.0606031 | .0170832                          | -3.55  | 0.000 | -.0940856            | -.0271206 |
| _cons              | -.1183332 | .0275168                          | -4.30  | 0.000 | -.1722651            | -.0644012 |
| sigma_u            | .3144136  |                                   |        |       |                      |           |
| sigma_e            | .21239087 |                                   |        |       |                      |           |
| rho                | .68666249 | (fraction of variance due to u_i) |        |       |                      |           |

. margins, dydx(\*)

Average marginal effects Number of obs = 38318  
Model VCE : Conventional

Expression : Linear prediction, predict()  
dy/dx w.r.t. : age 1.Married 2.qfachi 3.qfachi 4.qfachi 5.qfachi 7.qfachi 1.region2 2.region2  
3.region2 4.region2 5.region2 6.region2 8.region2  
9.region2 10.region2 11.region2 12.region2

|                    | Delta-method |           | z      | P> z  | [95% Conf. Interval] |           |
|--------------------|--------------|-----------|--------|-------|----------------------|-----------|
|                    | dy/dx        | Std. Err. |        |       |                      |           |
| age                | -.0048655    | .0002111  | -23.05 | 0.000 | -.0052791            | -.0044518 |
| 1.Married          | .0665866     | .0059779  | 11.14  | 0.000 | .0548701             | .078303   |
| qfachi             |              |           |        |       |                      |           |
| 1st degree         | .1275431     | .0176437  | 7.23   | 0.000 | .0929621             | .1621242  |
| hnd,hnc,teaching   | .0195629     | .0196935  | 0.99   | 0.321 | -.0190355            | .0581614  |
| a level            | -.0526734    | .0165123  | -3.19  | 0.001 | -.085037             | -.0203099 |
| o level            | -.0672662    | .0164302  | -4.09  | 0.000 | -.0994689            | -.0350635 |
| none of these      | -.155294     | .0174149  | -8.92  | 0.000 | -.1894266            | -.1211613 |
| region2            |              |           |        |       |                      |           |
| north east         | -.0407373    | .0250376  | -1.63  | 0.104 | -.0898101            | .0083355  |
| north west         | -.0417252    | .0191834  | -2.18  | 0.030 | -.0793239            | -.0041265 |
| yorkshire & humber | -.0312415    | .0199062  | -1.57  | 0.117 | -.0702569            | .007774   |
| east midlands      | -.0223575    | .0201949  | -1.11  | 0.268 | -.0619388            | .0172238  |
| west midlands      | -.0303487    | .0207301  | -1.46  | 0.143 | -.0709789            | .0102814  |

|                  |           |          |       |       |           |           |
|------------------|-----------|----------|-------|-------|-----------|-----------|
| east of england  | -.013134  | .019292  | -0.68 | 0.496 | -.0509456 | .0246777  |
| south east       | .0135225  | .017739  | 0.76  | 0.446 | -.0212452 | .0482902  |
| south west       | .0108219  | .0196866 | 0.55  | 0.583 | -.0277632 | .049407   |
| wales            | -.0521529 | .0167853 | -3.11 | 0.002 | -.0850513 | -.0192544 |
| scotland         | -.0360784 | .0166034 | -2.17 | 0.030 | -.0686205 | -.0035363 |
| northern ireland | -.0606031 | .0170832 | -3.55 | 0.000 | -.0940856 | -.0271206 |

Note: dy/dx for factor levels is the discrete change from the base level.

```
. xtprobit Employed `vlist', re
```

Fitting comparison model:

```
Iteration 0: log likelihood = -24921.244
Iteration 1: log likelihood = -15465.335
Iteration 2: log likelihood = -15264.514
Iteration 3: log likelihood = -15263.522
Iteration 4: log likelihood = -15263.522
```

Fitting full model:

```
rho = 0.0 log likelihood = -15263.522
rho = 0.1 log likelihood = -13755.146
rho = 0.2 log likelihood = -12819.061
rho = 0.3 log likelihood = -12178.432
rho = 0.4 log likelihood = -11721.076
rho = 0.5 log likelihood = -11394.202
rho = 0.6 log likelihood = -11173.948
rho = 0.7 log likelihood = -11062.941
rho = 0.8 log likelihood = -11119.683
```

```
Iteration 0: log likelihood = -11057.057
Iteration 1: log likelihood = -10265.38
Iteration 2: log likelihood = -9945.552
Iteration 3: log likelihood = -9925.1365
Iteration 4: log likelihood = -9919.3957
Iteration 5: log likelihood = -9919.342
Iteration 6: log likelihood = -9919.342 (backed up)
Iteration 7: log likelihood = -9918.6767
Iteration 8: log likelihood = -9918.6765
```

```
Random-effects probit regression      Number of obs      =      38318
Group variable: pid                  Number of groups    =      8593
```

```
Random effects u_i ~ Gaussian        Obs per group: min =      1
                                      avg =      4.5
                                      max =      6
```

```
Integration method: mvaghermite      Integration points =      12
```

```
Wald chi2(19) = 3702.57
Log likelihood = -9918.6765           Prob > chi2 = 0.0000
```

| Employed         | Coef.     | Std. Err. | z      | P> z  | [95% Conf. Interval] |           |
|------------------|-----------|-----------|--------|-------|----------------------|-----------|
| age              | .6149917  | .0128777  | 47.76  | 0.000 | .5897518             | .6402316  |
| c.age#c.age      | -.0075834 | .0001481  | -51.22 | 0.000 | -.0078736            | -.0072932 |
| 1.Married        | .8182663  | .0673814  | 12.14  | 0.000 | .6862012             | .9503314  |
| qfachi           |           |           |        |       |                      |           |
| 1st degree       | .7387439  | .1684994  | 4.38   | 0.000 | .4084911             | 1.068997  |
| hnd,hnc,teaching | .1171093  | .1837131  | 0.64   | 0.524 | -.2429617            | .4771803  |
| a level          | -.3629704 | .1531174  | -2.37  | 0.018 | -.663075             | -.0628659 |
| o level          | -.4088938 | .152889   | -2.67  | 0.007 | -.7085508            | -.1092368 |
| none of these    | -1.329894 | .1645512  | -8.08  | 0.000 | -1.652408            | -1.00738  |
| region2          |           |           |        |       |                      |           |
| north east       | -.5950389 | .2463405  | -2.42  | 0.016 | -1.077857            | -.1122204 |
| north west       | -.5093541 | .1908568  | -2.67  | 0.008 | -.8834265            | -.1352817 |



|                    |           |          |        |       |           |           |
|--------------------|-----------|----------|--------|-------|-----------|-----------|
| yorkshire & humber | -.3887488 | .2001168 | -1.94  | 0.052 | -.7809705 | .003473   |
| east midlands      | -.3169917 | .2043152 | -1.55  | 0.121 | -.7174421 | .0834588  |
| west midlands      | -.2941037 | .2051879 | -1.43  | 0.152 | -.6962646 | .1080571  |
| east of england    | -.1199811 | .1982107 | -0.61  | 0.545 | -.5084668 | .2685047  |
| south east         | .1914191  | .18606   | 1.03   | 0.304 | -.1732517 | .5560899  |
| south west         | .2189889  | .1998518 | 1.10   | 0.273 | -.1727134 | .6106911  |
| wales              | -.5094115 | .1694574 | -3.01  | 0.003 | -.841542  | -.1772811 |
| scotland           | -.361053  | .1678115 | -2.15  | 0.031 | -.6899574 | -.0321486 |
| northern ireland   | -.5397469 | .1721865 | -3.13  | 0.002 | -.8772262 | -.2022676 |
| _cons              | -8.60628  | .3012254 | -28.57 | 0.000 | -9.196671 | -8.015889 |
| /lnsig2u           | 1.931816  | .0384229 |        |       | 1.856509  | 2.007124  |
| sigma_u            | 2.627172  | .0504718 |        |       | 2.530089  | 2.727981  |
| rho                | .8734503  | .0042471 |        |       | .8648895  | .881543   |

Likelihood-ratio test of rho=0: chibar2(01) = 1.1e+04 Prob >= chibar2 = 0.000

. quadchk, nooutput

Refitting model intpoints() = 8

Refitting model intpoints() = 16

#### Quadrature check

|                          | Fitted<br>quadrature<br>12 points | Comparison<br>quadrature<br>8 points  | Comparison<br>quadrature<br>16 points |                                   |
|--------------------------|-----------------------------------|---------------------------------------|---------------------------------------|-----------------------------------|
| Log<br>likelihood        | -9918.6765                        | -9946.1055<br>.00276539               | -9936.1756<br>-17.499142<br>.00176426 | Difference<br>Relative difference |
| Employed:<br>age         | .61499169                         | .69427778<br>.07928609<br>.12892222   | .58160354<br>-.03338815<br>-.05429041 | Difference<br>Relative difference |
| Employed:<br>c.age#c.age | -.00758338                        | -.00855426<br>-.00097088<br>.12802685 | -.00718167<br>.00040171<br>-.05297202 | Difference<br>Relative difference |
| Employed:<br>1.Married   | .81826632                         | .85601843<br>.03775211<br>.0461367    | .80930207<br>-.00896425<br>-.01095518 | Difference<br>Relative difference |
| Employed:<br>2.qfachi    | .73874391                         | .83261861<br>.0938747<br>.1270734     | .76797966<br>.02923575<br>.03957494   | Difference<br>Relative difference |
| Employed:<br>3.qfachi    | .1171093                          | .17326046<br>.05615116<br>.47947647   | .11148825<br>-.00562106<br>-.04799838 | Difference<br>Relative difference |
| Employed:<br>4.qfachi    | -.36297043                        | -.3548869<br>.00808353<br>-.02227049  | -.37713915<br>-.01416873<br>.03903548 | Difference<br>Relative difference |
| Employed:<br>5.qfachi    | -.40889379                        | -.44101553<br>-.03212174<br>.07855766 | -.41935974<br>-.01046595<br>.02559578 | Difference<br>Relative difference |
| Employed:<br>7.qfachi    | -1.329894                         | -1.4816127<br>-.15171872<br>.11408332 | -1.2837958<br>.04609825<br>-.0346631  | Difference<br>Relative difference |
| Employed:<br>1.region2   | -.5950389                         | -.62938917<br>-.03435027<br>.05772777 | -.6030793<br>-.0080404<br>.0135124    | Difference<br>Relative difference |
| Employed:<br>2.region2   | -.50935409                        | -.55540419<br>-.04605009<br>.0904088  | -.51259158<br>-.00323749<br>.00635606 | Difference<br>Relative difference |

|            |            |            |            |                     |
|------------|------------|------------|------------|---------------------|
| -----      |            |            |            |                     |
| Employed:  | -.38874877 | -.42999789 | -.39383795 |                     |
| 3.region2  |            | -.04124913 | -.00508919 | Difference          |
|            |            | .10610742  | .0130912   | Relative difference |
| -----      |            |            |            |                     |
| Employed:  | -.31699165 | -.30934788 | -.32781566 |                     |
| 4.region2  |            | .00764377  | -.010824   | Difference          |
|            |            | -.02411349 | .03414602  | Relative difference |
| -----      |            |            |            |                     |
| Employed:  | -.29410374 | -.34328435 | -.28763227 |                     |
| 5.region2  |            | -.04918061 | .00647147  | Difference          |
|            |            | .16722197  | -.02200403 | Relative difference |
| -----      |            |            |            |                     |
| Employed:  | -.11998105 | -.13596225 | -.12446747 |                     |
| 6.region2  |            | -.0159812  | -.00448642 | Difference          |
|            |            | .13319773  | .03739274  | Relative difference |
| -----      |            |            |            |                     |
| Employed:  | .19141911  | .22551316  | .18767315  |                     |
| 8.region2  |            | .03409405  | -.00374596 | Difference          |
|            |            | .17811205  | -.01956942 | Relative difference |
| -----      |            |            |            |                     |
| Employed:  | .21898887  | .25377821  | .21426257  |                     |
| 9.region2  |            | .03478934  | -.0047263  | Difference          |
|            |            | .1588635   | -.02158239 | Relative difference |
| -----      |            |            |            |                     |
| Employed:  | -.50941154 | -.54549006 | -.51506112 |                     |
| 10.region2 |            | -.03607853 | -.00564959 | Difference          |
|            |            | .07082393  | .01109042  | Relative difference |
| -----      |            |            |            |                     |
| Employed:  | -.36105298 | -.39120378 | -.3646385  |                     |
| 11.region2 |            | -.0301508  | -.00358552 | Difference          |
|            |            | .08350798  | .00993074  | Relative difference |
| -----      |            |            |            |                     |
| Employed:  | -.5397469  | -.57849604 | -.53755487 |                     |
| 12.region2 |            | -.03874914 | .00219203  | Difference          |
|            |            | .07179131  | -.00406122 | Relative difference |
| -----      |            |            |            |                     |
| Employed:  | -8.6062799 | -9.648384  | -8.1331812 |                     |
| _cons      |            | -1.0421041 | .47309869  | Difference          |
|            |            | .12108648  | -.05497134 | Relative difference |
| -----      |            |            |            |                     |
| lnsig2u:   | 1.9318162  | 2.1780655  | 1.8347894  |                     |
| _cons      |            | .24624931  | -.0970268  | Difference          |
|            |            | .12747036  | -.05022569 | Relative difference |
| -----      |            |            |            |                     |

```
. xtprobit Employed `vlist', re intpoints(50)
```

Fitting comparison model:

```
Iteration 0:  log likelihood = -24921.244
Iteration 1:  log likelihood = -15465.335
Iteration 2:  log likelihood = -15264.514
Iteration 3:  log likelihood = -15263.522
Iteration 4:  log likelihood = -15263.522
```

Fitting full model:

```
rho = 0.0    log likelihood = -15263.522
rho = 0.1    log likelihood = -13755.146
rho = 0.2    log likelihood = -12819.059
rho = 0.3    log likelihood = -12178.43
rho = 0.4    log likelihood = -11721.106
rho = 0.5    log likelihood = -11394.226
rho = 0.6    log likelihood = -11173.946
rho = 0.7    log likelihood = -11057.594
rho = 0.8    log likelihood = -11072.158
```

```
Iteration 0:  log likelihood = -11057.595
Iteration 1:  log likelihood = -10262.193
Iteration 2:  log likelihood = -9957.4453
Iteration 3:  log likelihood = -9936.4833
Iteration 4:  log likelihood = -9936.1286
```

Iteration 5: log likelihood = -9936.1286  
 Iteration 6: log likelihood = -9936.1286

Random-effects probit regression  
 Group variable: pid  
 Random effects u\_i ~ Gaussian  
 Integration method: mvaghermite  
 Log likelihood = -9936.1286

Number of obs = 38318  
 Number of groups = 8593  
 Obs per group: min = 1  
 avg = 4.5  
 max = 6  
 Integration points = 50  
 Wald chi2(19) = 2127.11  
 Prob > chi2 = 0.0000

|                    | Employed        | Coef.     | Std. Err. | z      | P> z  | [95% Conf. Interval] |           |
|--------------------|-----------------|-----------|-----------|--------|-------|----------------------|-----------|
|                    | age             | .6038392  | .0157032  | 38.45  | 0.000 | .5730614             | .634617   |
|                    | c.age#c.age     | -.0074526 | .0001835  | -40.61 | 0.000 | -.0078122            | -.0070929 |
|                    | 1.Married       | .8289547  | .0717742  | 11.55  | 0.000 | .6882798             | .9696296  |
|                    | qfachi          |           |           |        |       |                      |           |
|                    | 1st degree      | .7812993  | .1874155  | 4.17   | 0.000 | .4139716             | 1.148627  |
| hnd,hnc,teaching   |                 | .1241926  | .2068055  | 0.60   | 0.548 | -.2811387            | .5295239  |
|                    | a level         | -.3842762 | .169653   | -2.27  | 0.024 | -.7167899            | -.0517625 |
|                    | o level         | -.4343384 | .1693891  | -2.56  | 0.010 | -.766335             | -.1023418 |
|                    | none of these   | -1.347033 | .1817233  | -7.41  | 0.000 | -1.703204            | -.9908618 |
|                    | region2         |           |           |        |       |                      |           |
|                    | north east      | -.620542  | .2691     | -2.31  | 0.021 | -1.147968            | -.0931157 |
|                    | north west      | -.5276376 | .2069742  | -2.55  | 0.011 | -.9332996            | -.1219756 |
| yorkshire & humber |                 | -.4017928 | .2185033  | -1.84  | 0.066 | -.8300514            | .0264658  |
|                    | east midlands   | -.3268754 | .2213306  | -1.48  | 0.140 | -.7606754            | .1069246  |
|                    | west midlands   | -.2997847 | .2224268  | -1.35  | 0.178 | -.7357331            | .1361638  |
|                    | east of england | -.1283834 | .2143897  | -0.60  | 0.549 | -.5485796            | .2918127  |
|                    | south east      | .1963778  | .199719   | 0.98   | 0.325 | -.1950642            | .5878198  |
|                    | south west      | .2257779  | .2157462  | 1.05   | 0.295 | -.1970769            | .6486326  |
|                    | wales           | -.5276039 | .1831779  | -2.88  | 0.004 | -.8866259            | -.1685819 |
|                    | scotland        | -.3711312 | .1813563  | -2.05  | 0.041 | -.726583             | -.0156793 |
| northern ireland   |                 | -.5519109 | .1862777  | -2.96  | 0.003 | -.9170085            | -.1868134 |
|                    | _cons           | -8.432192 | .3351655  | -25.16 | 0.000 | -9.089105            | -7.77528  |
|                    | /lnsig2u        | 1.906588  | .0478111  |        |       | 1.81288              | 2.000296  |
|                    | sigma_u         | 2.594241  | .0620168  |        |       | 2.475494             | 2.718684  |
|                    | rho             | .8706353  | .0053849  |        |       | .8597096             | .8808282  |

Likelihood-ratio test of rho=0: chibar2(01) = 1.1e+04 Prob >= chibar2 = 0.000

. quadchk, nooutput

Refitting model intpoints() = 34  
 Refitting model intpoints() = 66

#### Quadrature check

|                | Fitted<br>quadrature<br>50 points | Comparison<br>quadrature<br>34 points | Comparison<br>quadrature<br>66 points |                     |
|----------------|-----------------------------------|---------------------------------------|---------------------------------------|---------------------|
| Log likelihood | -9936.1286                        | -9936.2687                            | -9936.135                             |                     |
|                |                                   | -.14010164                            | -.0064179                             | Difference          |
|                |                                   | .0000141                              | 6.459e-07                             | Relative difference |
| Employed:      | .60383921                         | .60334502                             | .6039366                              |                     |
| age            |                                   | -.00049419                            | .00009739                             | Difference          |
|                |                                   | -.00081841                            | .00016128                             | Relative difference |
| Employed:      | -.00745257                        | -.00744677                            | -.00745375                            |                     |

|             |            |            |            |                     |
|-------------|------------|------------|------------|---------------------|
| c.age#c.age |            | 5.806e-06  | -1.178e-06 | Difference          |
|             |            | -.00077902 | .0001581   | Relative difference |
| -----       |            |            |            |                     |
| Employed:   | .82895466  | .82887891  | .82907122  |                     |
| 1.Married   |            | -.00007575 | .00011656  | Difference          |
|             |            | -.00009138 | .00014061  | Relative difference |
| -----       |            |            |            |                     |
| Employed:   | .78129925  | .78302395  | .78115623  |                     |
| 2.qfachi    |            | .00172469  | -.00014302 | Difference          |
|             |            | .00220747  | -.00018305 | Relative difference |
| -----       |            |            |            |                     |
| Employed:   | .12419261  | .1242719   | .12425466  |                     |
| 3.qfachi    |            | .00007928  | .00006204  | Difference          |
|             |            | .00063837  | .00049957  | Relative difference |
| -----       |            |            |            |                     |
| Employed:   | -.38427623 | -.38503235 | -.38445314 |                     |
| 4.qfachi    |            | -.00075612 | -.0001769  | Difference          |
|             |            | .00196764  | .00046036  | Relative difference |
| -----       |            |            |            |                     |
| Employed:   | -.43433841 | -.43519439 | -.43453927 |                     |
| 5.qfachi    |            | -.00085598 | -.00020086 | Difference          |
|             |            | .00197077  | .00046245  | Relative difference |
| -----       |            |            |            |                     |
| Employed:   | -1.3470329 | -1.3463316 | -1.3475397 |                     |
| 7.qfachi    |            | .00070126  | -.0005068  | Difference          |
|             |            | -.00052059 | .00037623  | Relative difference |
| -----       |            |            |            |                     |
| Employed:   | -.62054202 | -.62123331 | -.62068742 |                     |
| 1.region2   |            | -.00069129 | -.0001454  | Difference          |
|             |            | .001114    | .0002343   | Relative difference |
| -----       |            |            |            |                     |
| Employed:   | -.52763758 | -.52804582 | -.52771096 |                     |
| 2.region2   |            | -.00040824 | -.00007338 | Difference          |
|             |            | .00077372  | .00013908  | Relative difference |
| -----       |            |            |            |                     |
| Employed:   | -.40179278 | -.40237015 | -.40179798 |                     |
| 3.region2   |            | -.00057738 | -5.201e-06 | Difference          |
|             |            | .001437    | .00001295  | Relative difference |
| -----       |            |            |            |                     |
| Employed:   | -.32687545 | -.32709653 | -.32686332 |                     |
| 4.region2   |            | -.00022108 | .00001213  | Difference          |
|             |            | .00067636  | -.0000371  | Relative difference |
| -----       |            |            |            |                     |
| Employed:   | -.29978466 | -.2998909  | -.29979505 |                     |
| 5.region2   |            | -.00010624 | -.00001039 | Difference          |
|             |            | .0003544   | .00003465  | Relative difference |
| -----       |            |            |            |                     |
| Employed:   | -.12838344 | -.12855009 | -.1283699  |                     |
| 6.region2   |            | -.00016665 | .00001354  | Difference          |
|             |            | .00129808  | -.00010548 | Relative difference |
| -----       |            |            |            |                     |
| Employed:   | .19637777  | .19651322  | .19641432  |                     |
| 8.region2   |            | .00013545  | .00003655  | Difference          |
|             |            | .00068976  | .00018614  | Relative difference |
| -----       |            |            |            |                     |
| Employed:   | .22577785  | .22596043  | .22589145  |                     |
| 9.region2   |            | .00018258  | .0001136   | Difference          |
|             |            | .00080867  | .00050315  | Relative difference |
| -----       |            |            |            |                     |
| Employed:   | -.5276039  | -.5282228  | -.52767128 |                     |
| 10.region2  |            | -.00061891 | -.00006738 | Difference          |
|             |            | .00117305  | .00012771  | Relative difference |
| -----       |            |            |            |                     |
| Employed:   | -.37113116 | -.37162409 | -.37114929 |                     |
| 11.region2  |            | -.00049293 | -.00001813 | Difference          |
|             |            | .00132819  | .00004886  | Relative difference |
| -----       |            |            |            |                     |
| Employed:   | -.55191093 | -.55225649 | -.55197844 |                     |
| 12.region2  |            | -.00034556 | -.00006751 | Difference          |
|             |            | .00062612  | .00012232  | Relative difference |
| -----       |            |            |            |                     |
| Employed:   | -8.4321925 | -8.4245255 | -8.4333863 |                     |
| _cons       |            | .00766696  | -.00119382 | Difference          |



|                                    |                    |   |         |
|------------------------------------|--------------------|---|---------|
| Random-effects logistic regression | Number of obs      | = | 38318   |
| Group variable: pid                | Number of groups   | = | 8593    |
| Random effects u_i ~ Gaussian      | Obs per group: min | = | 1       |
|                                    | avg                | = | 4.5     |
|                                    | max                | = | 6       |
| Integration method: mvaghermite    | Integration points | = | 12      |
|                                    | Wald chi2(19)      | = | 3159.18 |
| Log likelihood = -9889.0729        | Prob > chi2        | = | 0.0000  |

|                   | Fitted<br>quadrature<br>12 points | Comparison<br>quadrature<br>8 points  | Comparison<br>quadrature<br>16 points |                                   |
|-------------------|-----------------------------------|---------------------------------------|---------------------------------------|-----------------------------------|
| Log<br>likelihood | -9889.0729                        | -9905.2038<br>-16.130815<br>.00163118 | -9910.804<br>-21.731051<br>.00219748  | Difference<br>Relative difference |
| Employed:<br>age  | 1.0712286                         | 1.2310672<br>.15983862                | 1.0488609<br>-.02236764               | Difference                        |

|             |            |            |            |                     |
|-------------|------------|------------|------------|---------------------|
|             |            | .14921056  | -.02088036 | Relative difference |
| Employed:   | -.01322034 | -.01517391 | -.01295896 |                     |
| c.age#c.age |            | -.00195356 | .00026139  | Difference          |
|             |            | .14776941  | -.01977169 | Relative difference |
| Employed:   | 1.4830381  | 1.5623748  | 1.5108048  |                     |
| 1.Married   |            | .0793367   | .02776675  | Difference          |
|             |            | .05349607  | .01872288  | Relative difference |
| Employed:   | 1.3315688  | 1.4819316  | 1.4037063  |                     |
| 2.qfachi    |            | .15036283  | .07213752  | Difference          |
|             |            | .11292156  | .05417484  | Relative difference |
| Employed:   | .19015551  | .28644864  | .19674628  |                     |
| 3.qfachi    |            | .09629313  | .00659077  | Difference          |
|             |            | .5063915   | .03465992  | Relative difference |
| Employed:   | -.64729556 | -.62670132 | -.70348688 |                     |
| 4.qfachi    |            | .02059424  | -.05619132 | Difference          |
|             |            | -.03181582 | .08680937  | Relative difference |
| Employed:   | -.71821039 | -.78313808 | -.77759976 |                     |
| 5.qfachi    |            | -.06492769 | -.05938937 | Difference          |
|             |            | .09040205  | .08269077  | Relative difference |
| Employed:   | -2.2947878 | -2.5341196 | -2.351899  |                     |
| 7.qfachi    |            | -.23933183 | -.05711122 | Difference          |
|             |            | .10429366  | .02488736  | Relative difference |
| Employed:   | -1.0549767 | -1.0911217 | -1.1177287 |                     |
| 1.region2   |            | -.03614499 | -.06275201 | Difference          |
|             |            | .03426141  | .05948189  | Relative difference |
| Employed:   | -.93171821 | -1.024697  | -.96761594 |                     |
| 2.region2   |            | -.09297875 | -.03589774 | Difference          |
|             |            | .09979278  | .03852853  | Relative difference |
| Employed:   | -.70828908 | -.79467348 | -.72315058 |                     |
| 3.region2   |            | -.0863844  | -.01486149 | Difference          |
|             |            | .12196207  | .02098224  | Relative difference |
| Employed:   | -.60460219 | -.58931766 | -.6236486  |                     |
| 4.region2   |            | .01528453  | -.01904641 | Difference          |
|             |            | -.02528031 | .03150238  | Relative difference |
| Employed:   | -.54494395 | -.6358546  | -.54894938 |                     |
| 5.region2   |            | -.09091064 | -.00400543 | Difference          |
|             |            | .16682568  | .00735016  | Relative difference |
| Employed:   | -.20763379 | -.23323844 | -.22252999 |                     |
| 6.region2   |            | -.02560465 | -.0148962  | Difference          |
|             |            | .12331638  | .07174265  | Relative difference |
| Employed:   | .31863033  | .37448678  | .32304399  |                     |
| 8.region2   |            | .05585645  | .00441366  | Difference          |
|             |            | .17530173  | .01385196  | Relative difference |
| Employed:   | .34271146  | .4069343   | .35552572  |                     |
| 9.region2   |            | .06422285  | .01281426  | Difference          |
|             |            | .18739626  | .03739081  | Relative difference |
| Employed:   | -.91945386 | -.98160601 | -.95289517 |                     |
| 10.region2  |            | -.06215215 | -.03344131 | Difference          |
|             |            | .06759681  | .03637084  | Relative difference |
| Employed:   | -.66415795 | -.73063653 | -.67424841 |                     |
| 11.region2  |            | -.06647858 | -.01009046 | Difference          |
|             |            | .10009453  | .01519286  | Relative difference |
| Employed:   | -.97814878 | -1.0474947 | -.99271831 |                     |
| 12.region2  |            | -.06934588 | -.01456954 | Difference          |
|             |            | .07089503  | .01489501  | Relative difference |

```

-----
Employed:    -15.034855    -17.19449    -14.660259
      _cons          -2.1596348    .37459595    Difference
                        .14364188    -.02491517    Relative difference
-----
lnsig2u:      3.0275874    3.2987276    2.9991716
      _cons          .27114011    -.02841588    Difference
                        .08955649    -.00938565    Relative difference
-----

```

```
. xtlogit Employed `vlist', re intpoints(50)
```

Fitting comparison model:

```

Iteration 0:    log likelihood = -24921.244
Iteration 1:    log likelihood = -15209.129
Iteration 2:    log likelihood = -15147.752
Iteration 3:    log likelihood = -15147.628
Iteration 4:    log likelihood = -15147.628

```

Fitting full model:

```

tau = 0.0      log likelihood = -15147.628
tau = 0.1      log likelihood = -14541.393
tau = 0.2      log likelihood = -13957.017
tau = 0.3      log likelihood = -13401.159
tau = 0.4      log likelihood = -12877.828
tau = 0.5      log likelihood = -12389.192
tau = 0.6      log likelihood = -11937.814
tau = 0.7      log likelihood = -11530.935
tau = 0.8      log likelihood = -11192.561

```

```

Iteration 0:    log likelihood = -11530.935
Iteration 1:    log likelihood = -10352.741
Iteration 2:    log likelihood = -9999.1769
Iteration 3:    log likelihood = -9909.5216
Iteration 4:    log likelihood = -9907.4678
Iteration 5:    log likelihood = -9907.463
Iteration 6:    log likelihood = -9907.463

```

```

Random-effects logistic regression      Number of obs      =      38318
Group variable: pid                    Number of groups    =      8593

```

```

Random effects u_i ~ Gaussian           Obs per group: min =      1
                                         avg  =      4.5
                                         max  =      6

```

```

Integration method: mvaghermite        Integration points =      50

```

```

Log likelihood = -9907.463              Wald chi2(19)      =      1973.66
                                         Prob > chi2        =      0.0000

```

```

-----
              Employed |      Coef.   Std. Err.      z    P>|z|      [95% Conf. Interval]
-----+-----
              age      |      1.098885   .0293226    37.48   0.000      1.041414      1.156357
              c.age#c.age |     -.0135677   .0003435   -39.49   0.000     -.014241     -.0128944
              1.Married |      1.540648   .1339779    11.50   0.000      1.278056      1.80324
              qfachi    |
1st degree          |      1.424031   .3402752     4.18   0.000      .757104      2.090958
hnd,hnc,teaching    |      .2225392   .3752402     0.59   0.553     -.512918      .9579965
              a level   |     -.693804   .3072645    -2.26   0.024     -1.296031     -.0915767
              o level   |     -.7839168   .306808    -2.56   0.011     -1.385249     -.1825842
              none of these |     -2.443259   .3300875    -7.40   0.000     -3.090219     -1.7963
              region2   |
north east          |     -1.129849   .4885396    -2.31   0.021     -2.087369     -.1723288
north west          |     -.9877462   .3763174    -2.62   0.009     -1.725315     -.2501777
yorkshire & humber   |     -.7395821   .3980645    -1.86   0.063     -1.519774      .0406101
east midlands       |     -.6184952   .4040202    -1.53   0.126     -1.41036      .1733698
-----

```



|                  |            |          |        |       |           |           |
|------------------|------------|----------|--------|-------|-----------|-----------|
| west midlands    | - .5763159 | .4058969 | -1.42  | 0.156 | -1.371859 | .2192274  |
| east of england  | - .228451  | .3910278 | -0.58  | 0.559 | -.9948514 | .5379493  |
| south east       | .3358652   | .3656141 | 0.92   | 0.358 | -.3807252 | 1.052456  |
| south west       | .3695682   | .3955796 | 0.93   | 0.350 | -.4057535 | 1.14489   |
| wales            | -.9663107  | .3339831 | -2.89  | 0.004 | -1.620906 | -.3117159 |
| scotland         | -.6848658  | .3310538 | -2.07  | 0.039 | -1.333719 | -.0360124 |
| northern ireland | -1.013426  | .3396893 | -2.98  | 0.003 | -1.679205 | -.3476471 |
| _cons            | -15.35734  | .6167925 | -24.90 | 0.000 | -16.56623 | -14.14845 |
| /lnsig2u         | 3.086158   | .0492891 |        |       | 2.989554  | 3.182763  |
| sigma_u          | 4.678976   | .1153113 |        |       | 4.458341  | 4.910529  |
| rho              | .8693599   | .0055979 |        |       | .8579914  | .8799457  |

Likelihood-ratio test of rho=0: chibar2(01) = 1.0e+04 Prob >= chibar2 = 0.000

. quadchk, nooutput

Refitting model intpoints() = 34

Refitting model intpoints() = 66

#### Quadrature check

|                          | Fitted<br>quadrature<br>50 points | Comparison<br>quadrature<br>34 points | Comparison<br>quadrature<br>66 points |                                   |
|--------------------------|-----------------------------------|---------------------------------------|---------------------------------------|-----------------------------------|
| Log likelihood           | -9907.463                         | -9907.8421<br>-.37915073<br>.00003827 | -9907.4366<br>.0264141<br>-2.666e-06  | Difference<br>Relative difference |
| Employed:<br>age         | 1.0988854                         | 1.1003668<br>.00148143<br>.00134812   | 1.0996127<br>.00072728<br>.00066183   | Difference<br>Relative difference |
| Employed:<br>c.age#c.age | -.01356768                        | -.01358581<br>-.00001813<br>.00133638 | -.01357633<br>-8.650e-06<br>.00063755 | Difference<br>Relative difference |
| Employed:<br>1.Married   | 1.540648                          | 1.5452705<br>.00462247<br>.00300034   | 1.5410968<br>.00044882<br>.00029132   | Difference<br>Relative difference |
| Employed:<br>2.qfachi    | 1.4240311                         | 1.4244463<br>.00041515<br>.00029153   | 1.4229289<br>-.00110224<br>-.00077403 | Difference<br>Relative difference |
| Employed:<br>3.qfachi    | .22253923                         | .22343459<br>.00089536<br>.00402337   | .22220124<br>-.00033799<br>-.00151878 | Difference<br>Relative difference |
| Employed:<br>4.qfachi    | -.69380397                        | -.70013485<br>-.00633089<br>.00912489 | -.69290414<br>.00089983<br>-.00129695 | Difference<br>Relative difference |
| Employed:<br>5.qfachi    | -.78391681                        | -.79069644<br>-.00677963<br>.00864841 | -.78293713<br>.00097968<br>-.00124972 | Difference<br>Relative difference |
| Employed:<br>7.qfachi    | -2.4432594                        | -2.4573949<br>-.0141355<br>.00578551  | -2.444712<br>-.00145251<br>.0005945   | Difference<br>Relative difference |
| Employed:<br>1.region2   | -1.1298488                        | -1.1361259<br>-.00627712<br>.00555572 | -1.1296608<br>.000188<br>-.00016639   | Difference<br>Relative difference |
| Employed:<br>2.region2   | -.98774617                        | -.99134859<br>-.00360242<br>.00364711 | -.98773843<br>7.742e-06<br>-7.838e-06 | Difference<br>Relative difference |
| Employed:                | -.73958212                        | -.7411527                             | -.73932973                            |                                   |



|                  |            |          |       |       |           |           |
|------------------|------------|----------|-------|-------|-----------|-----------|
| west midlands    | - .5763159 | .4058969 | -1.42 | 0.156 | -1.371859 | .2192274  |
| east of england  | - .228451  | .3910278 | -0.58 | 0.559 | -.9948514 | .5379493  |
| south east       | .3358652   | .3656141 | 0.92  | 0.358 | -.3807252 | 1.052456  |
| south west       | .3695682   | .3955796 | 0.93  | 0.350 | -.4057535 | 1.14489   |
| wales            | -.9663107  | .3339831 | -2.89 | 0.004 | -1.620906 | -.3117159 |
| scotland         | -.6848658  | .3310538 | -2.07 | 0.039 | -1.333719 | -.0360124 |
| northern ireland | -1.013426  | .3396893 | -2.98 | 0.003 | -1.679205 | -.3476471 |

Note: dy/dx for factor levels is the discrete change from the base level.

```
.
.
.
. * 10.2.4 Fixed Effects Estimators
. *-----
.
. xtreg    Employed `vlist', fe
```

```
Fixed-effects (within) regression           Number of obs   =    38318
Group variable: pid                        Number of groups =    8593

R-sq:  within = 0.0556                     Obs per group:  min =     1
        between = 0.2826                      avg   =    4.5
        overall = 0.2530                      max   =     6

                                           F(19,29706)      =    92.11
corr(u_i, Xb) = -0.2033                     Prob > F         =    0.0000
```

|                    | Employed        | Coef.     | Std. Err.                         | t      | P> t  | [95% Conf. Interval] |           |
|--------------------|-----------------|-----------|-----------------------------------|--------|-------|----------------------|-----------|
|                    | age             | .0388825  | .0020734                          | 18.75  | 0.000 | .0348186             | .0429465  |
|                    | c.age#c.age     | -.0004665 | .0000202                          | -23.05 | 0.000 | -.0005062            | -.0004269 |
|                    | 1.Married       | .0086075  | .007647                           | 1.13   | 0.260 | -.006381             | .023596   |
|                    | qfachi          |           |                                   |        |       |                      |           |
|                    | 1st degree      | .6162655  | .0463146                          | 13.31  | 0.000 | .5254867             | .7070442  |
| hnd,hnc,teaching   |                 | .3965048  | .051124                           | 7.76   | 0.000 | .2962996             | .49671    |
|                    | a level         | .1568052  | .0435374                          | 3.60   | 0.000 | .0714699             | .2421405  |
|                    | o level         | .024555   | .0432379                          | 0.57   | 0.570 | -.0601932            | .1093032  |
|                    | none of these   | .0703935  | .0493975                          | 1.43   | 0.154 | -.0264278            | .1672148  |
|                    | region2         |           |                                   |        |       |                      |           |
|                    | north east      | -.0002505 | .0567421                          | -0.00  | 0.996 | -.1114674            | .1109665  |
|                    | north west      | -.0610296 | .041849                           | -1.46  | 0.145 | -.1430556            | .0209963  |
| yorkshire & humber |                 | -.0664431 | .0399399                          | -1.66  | 0.096 | -.1447271            | .0118409  |
|                    | east midlands   | -.051137  | .0383883                          | -1.33  | 0.183 | -.1263797            | .0241058  |
|                    | west midlands   | -.167806  | .0427132                          | -3.93  | 0.000 | -.2515258            | -.0840863 |
|                    | east of england | -.0816076 | .0344393                          | -2.37  | 0.018 | -.1491102            | -.014105  |
|                    | south east      | .021631   | .0301911                          | 0.72   | 0.474 | -.0375449            | .080807   |
|                    | south west      | -.0444085 | .0364615                          | -1.22  | 0.223 | -.1158746            | .0270577  |
|                    | wales           | -.0446138 | .0424055                          | -1.05  | 0.293 | -.1277305            | .0385029  |
|                    | scotland        | -.0567224 | .045463                           | -1.25  | 0.212 | -.1458318            | .032387   |
| northern ireland   |                 | .013485   | .1430718                          | 0.09   | 0.925 | -.2669419            | .2939119  |
|                    | _cons           | -.1445232 | .0723495                          | -2.00  | 0.046 | -.2863313            | -.0027151 |
|                    | sigma_u         | .38838716 |                                   |        |       |                      |           |
|                    | sigma_e         | .21239087 |                                   |        |       |                      |           |
|                    | rho             | .76979405 | (fraction of variance due to u_i) |        |       |                      |           |

F test that all u\_i=0: F(8592, 29706) = 10.20 Prob > F = 0.0000

```
. margins, dydx(*)
```

```
Average marginal effects           Number of obs   =    38318
Model VCE      : Conventional
```

```
Expression      : Linear prediction, predict()
dy/dx w.r.t.    : age 1.Married 2.qfachi 3.qfachi 4.qfachi 5.qfachi 7.qfachi 1.region2 2.region2
3.region2 4.region2 5.region2 6.region2 8.region2
```

|                    |                 | Delta-method |           |       |       | [95% Conf. Interval] |           |
|--------------------|-----------------|--------------|-----------|-------|-------|----------------------|-----------|
|                    |                 | dy/dx        | Std. Err. | z     | P> z  |                      |           |
|                    | age             | -.0040561    | .0007026  | -5.77 | 0.000 | -.0054332            | -.0026789 |
|                    | 1.Married       | .0086075     | .007647   | 1.13  | 0.260 | -.0063804            | .0235954  |
|                    | qfachi          |              |           |       |       |                      |           |
|                    | 1st degree      | .6162655     | .0463146  | 13.31 | 0.000 | .5254904             | .7070405  |
| hnd,hnc,teaching   |                 | .3965048     | .051124   | 7.76  | 0.000 | .2963036             | .4967059  |
|                    | a level         | .1568052     | .0435374  | 3.60  | 0.000 | .0714734             | .242137   |
|                    | o level         | .024555      | .0432379  | 0.57  | 0.570 | -.0601898            | .1092998  |
|                    | none of these   | .0703935     | .0493975  | 1.43  | 0.154 | -.0264239            | .1672109  |
|                    | region2         |              |           |       |       |                      |           |
|                    | north east      | -.0002505    | .0567421  | -0.00 | 0.996 | -.1114629            | .1109619  |
|                    | north west      | -.0610296    | .041849   | -1.46 | 0.145 | -.1430522            | .020993   |
| yorkshire & humber |                 | -.0664431    | .0399399  | -1.66 | 0.096 | -.144724             | .0118377  |
|                    | east midlands   | -.051137     | .0383883  | -1.33 | 0.183 | -.1263766            | .0241027  |
|                    | west midlands   | -.167806     | .0427132  | -3.93 | 0.000 | -.2515224            | -.0840897 |
|                    | east of england | -.0816076    | .0344393  | -2.37 | 0.018 | -.1491074            | -.0141078 |
|                    | south east      | .021631      | .0301911  | 0.72  | 0.474 | -.0375425            | .0808046  |
|                    | south west      | -.0444085    | .0364615  | -1.22 | 0.223 | -.1158717            | .0270548  |
|                    | wales           | -.0446138    | .0424055  | -1.05 | 0.293 | -.1277271            | .0384995  |
|                    | scotland        | -.0567224    | .045463   | -1.25 | 0.212 | -.1458282            | .0323833  |
| northern ireland   |                 | .013485      | .1430718  | 0.09  | 0.925 | -.2669305            | .2939005  |

Note: dy/dx for factor levels is the discrete change from the base level.

```
.
. xtlogit Employed `vlist', fe or
note: multiple positive outcomes within groups encountered.
note: 7130 groups (30832 obs) dropped because of all positive or
      all negative outcomes.
note: 12.region2 omitted because of no within-group variance.
```

```
Iteration 0: log likelihood = -2680.58
Iteration 1: log likelihood = -2270.8087
Iteration 2: log likelihood = -2265.9408
Iteration 3: log likelihood = -2265.8526
Iteration 4: log likelihood = -2265.8525
```

```
Conditional fixed-effects logistic regression   Number of obs   =       7486
Group variable: pid                           Number of groups =       1463

Obs per group: min =         2
               avg =        5.1
               max =         6

LR chi2(18) = 1103.35
Log likelihood = -2265.8525                    Prob > chi2      =    0.0000
```

|                  | Employed      | OR       | Std. Err. | z      | P> z  | [95% Conf. Interval] |          |
|------------------|---------------|----------|-----------|--------|-------|----------------------|----------|
|                  | age           | 2.469028 | .1216819  | 18.34  | 0.000 | 2.241692             | 2.719418 |
|                  | c.age#c.age   | .9876368 | .0005531  | -22.22 | 0.000 | .9865534             | .9887214 |
|                  | 1.Married     | 1.154252 | .206279   | 0.80   | 0.422 | .813168              | 1.638403 |
|                  | qfachi        |          |           |        |       |                      |          |
|                  | 1st degree    | 286.2441 | 309.7567  | 5.23   | 0.000 | 34.3254              | 2387.027 |
| hnd,hnc,teaching |               | 43.13426 | 49.82531  | 3.26   | 0.001 | 4.48313              | 415.0147 |
|                  | a level       | 10.35401 | 10.06398  | 2.40   | 0.016 | 1.540814             | 69.57716 |
|                  | o level       | 1.421602 | 1.321424  | 0.38   | 0.705 | .2299106             | 8.790161 |
|                  | none of these | 2.092251 | 2.225395  | 0.69   | 0.488 | .2601625             | 16.82608 |
|                  | region2       |          |           |        |       |                      |          |
|                  | north east    | .5965647 | .6733639  | -0.46  | 0.647 | .0652944             | 5.450536 |
|                  | north west    | .3760586 | .3109192  | -1.18  | 0.237 | .0743868             | 1.901145 |

|                    |          |           |       |       |          |          |
|--------------------|----------|-----------|-------|-------|----------|----------|
| yorkshire & humber | .2331227 | .2316946  | -1.47 | 0.143 | .0332352 | 1.635202 |
| east midlands      | 1.098137 | .871029   | 0.12  | 0.906 | .2320031 | 5.197797 |
| west midlands      | .1625821 | .1333611  | -2.21 | 0.027 | .032573  | .8114976 |
| east of england    | .3624298 | .2620743  | -1.40 | 0.160 | .087845  | 1.495308 |
| south east         | 1.983101 | 1.389928  | 0.98  | 0.329 | .5020529 | 7.833219 |
| south west         | .7664997 | .5666354  | -0.36 | 0.719 | .1799951 | 3.264099 |
| wales              | .6194918 | .5679473  | -0.52 | 0.601 | .1027207 | 3.736055 |
| scotland           | .3523899 | .2866363  | -1.28 | 0.200 | .0715567 | 1.735387 |
| northern ireland   | 1        | (omitted) |       |       |          |          |

```

.
. xtlogit Employed `vlist', fe
note: multiple positive outcomes within groups encountered.
note: 7130 groups (30832 obs) dropped because of all positive or
      all negative outcomes.
note: 12.region2 omitted because of no within-group variance.

```

```

Iteration 0:  log likelihood =  -2680.58
Iteration 1:  log likelihood = -2270.8087
Iteration 2:  log likelihood = -2265.9408
Iteration 3:  log likelihood = -2265.8526
Iteration 4:  log likelihood = -2265.8525

```

|                                               |                    |   |         |
|-----------------------------------------------|--------------------|---|---------|
| Conditional fixed-effects logistic regression | Number of obs      | = | 7486    |
| Group variable: pid                           | Number of groups   | = | 1463    |
|                                               | Obs per group: min | = | 2       |
|                                               | avg                | = | 5.1     |
|                                               | max                | = | 6       |
|                                               | LR chi2(18)        | = | 1103.35 |
| Log likelihood = -2265.8525                   | Prob > chi2        | = | 0.0000  |

|                    | Employed | Coef.     | Std. Err. | z      | P> z  | [95% Conf. Interval] |
|--------------------|----------|-----------|-----------|--------|-------|----------------------|
| age                |          | .9038244  | .0492833  | 18.34  | 0.000 | .8072309 1.000418    |
| c.age#c.age        |          | -.0124403 | .00056    | -22.22 | 0.000 | -.0135378 -.0113427  |
| 1.Married          |          | .1434521  | .1787123  | 0.80   | 0.422 | -.2068175 .4937218   |
| qfachi             |          |           |           |        |       |                      |
| 1st degree         |          | 5.656845  | 1.082142  | 5.23   | 0.000 | 3.535886 7.777804    |
| hnd,hnc,teaching   |          | 3.764318  | 1.155121  | 3.26   | 0.001 | 1.500321 6.028314    |
| a level            |          | 2.337374  | .9719886  | 2.40   | 0.016 | .432311 4.242436     |
| o level            |          | .3517841  | .9295318  | 0.38   | 0.705 | -1.470065 2.173633   |
| none of these      |          | .7382407  | 1.063637  | 0.69   | 0.488 | -1.346449 2.82293    |
| region2            |          |           |           |        |       |                      |
| north east         |          | -.5165676 | 1.128736  | -0.46  | 0.647 | -2.728849 1.695714   |
| north west         |          | -.9780104 | .826784   | -1.18  | 0.237 | -2.598477 .6424565   |
| yorkshire & humber |          | -1.45619  | .9938738  | -1.47  | 0.143 | -3.404147 .4917666   |
| east midlands      |          | .0936151  | .7931879  | 0.12   | 0.906 | -1.461005 1.648235   |
| west midlands      |          | -1.816572 | .8202692  | -2.21  | 0.027 | -3.42427 -.2088738   |
| east of england    |          | -1.014925 | .7231036  | -1.40  | 0.160 | -2.432182 .4023323   |
| south east         |          | .6846618  | .7008862  | 0.98   | 0.329 | -.6890498 2.058373   |
| south west         |          | -.2659209 | .7392506  | -0.36  | 0.719 | -1.714826 1.182984   |
| wales              |          | -.4788559 | .9167955  | -0.52  | 0.601 | -2.275742 1.31803    |
| scotland           |          | -1.043017 | .8134066  | -1.28  | 0.200 | -2.637265 .5512305   |
| northern ireland   |          | 0         | (omitted) |        |       |                      |

```

.
. clogit Employed `vlist', group(pid)
note: multiple positive outcomes within groups encountered.
note: 7130 groups (30832 obs) dropped because of all positive or
      all negative outcomes.
note: 12.region2 omitted because of no within-group variance.

```

```

Iteration 0:  log likelihood =  -2680.58
Iteration 1:  log likelihood = -2270.8087

```

|                                                 |               |   |         |
|-------------------------------------------------|---------------|---|---------|
| Conditional (fixed-effects) logistic regression | Number of obs | = | 7486    |
|                                                 | LR chi2(18)   | = | 1103.35 |
|                                                 | Prob > chi2   | = | 0.0000  |
| Log likelihood = -2265.8525                     | Pseudo R2     | = | 0.1958  |

```
. bysort pid: egen check1 = mean(Employed & Employed < .)

. bysort pid: egen check2 = mean(R12 & R12 < .)

. * identify the first observation for each person
. bysort pid (wave): generate firstobs = 1 if _n == 1
(29725 missing values generated)

. * How many individuals for whom check is 0 or 1
. tabulate check1 if firstobs == 1 & inlist(check1,0,1)
```

```
. tabulate check2 if firstobs == 1
```

```
.
.
. clogit Employed `vlist', group(pid) or
note: multiple positive outcomes within groups encountered.
note: 7130 groups (30832 obs) dropped because of all positive or
```

all negative outcomes.  
note: 12.region2 omitted because of no within-group variance.

Iteration 0: log likelihood = -2680.58  
Iteration 1: log likelihood = -2270.8087  
Iteration 2: log likelihood = -2265.9408  
Iteration 3: log likelihood = -2265.8526  
Iteration 4: log likelihood = -2265.8525

Conditional (fixed-effects) logistic regression      Number of obs      =      7486  
LR chi2(18)      =      1103.35  
Prob > chi2      =      0.0000  
Pseudo R2      =      0.1958  
Log likelihood = -2265.8525

|                    | Employed        | Odds Ratio | Std. Err. | z      | P> z  | [95% Conf. Interval] |          |
|--------------------|-----------------|------------|-----------|--------|-------|----------------------|----------|
|                    | age             | 2.469028   | .1216819  | 18.34  | 0.000 | 2.241692             | 2.719418 |
|                    | c.age#c.age     | .9876368   | .0005531  | -22.22 | 0.000 | .9865534             | .9887214 |
|                    | 1.Married       | 1.154252   | .206279   | 0.80   | 0.422 | .813168              | 1.638403 |
|                    | qfachi          |            |           |        |       |                      |          |
|                    | 1st degree      | 286.2441   | 309.7567  | 5.23   | 0.000 | 34.3254              | 2387.027 |
| hnd,hnc,teaching   |                 | 43.13426   | 49.82531  | 3.26   | 0.001 | 4.48313              | 415.0147 |
|                    | a level         | 10.35401   | 10.06398  | 2.40   | 0.016 | 1.540814             | 69.57716 |
|                    | o level         | 1.421602   | 1.321424  | 0.38   | 0.705 | .2299106             | 8.790161 |
|                    | none of these   | 2.092251   | 2.225395  | 0.69   | 0.488 | .2601625             | 16.82608 |
|                    | region2         |            |           |        |       |                      |          |
|                    | north east      | .5965647   | .6733639  | -0.46  | 0.647 | .0652944             | 5.450536 |
|                    | north west      | .3760586   | .3109192  | -1.18  | 0.237 | .0743868             | 1.901145 |
| yorkshire & humber |                 | .2331227   | .2316946  | -1.47  | 0.143 | .0332352             | 1.635202 |
|                    | east midlands   | 1.098137   | .871029   | 0.12   | 0.906 | .2320031             | 5.197797 |
|                    | west midlands   | .1625821   | .1333611  | -2.21  | 0.027 | .032573              | .8114976 |
|                    | east of england | .3624298   | .2620743  | -1.40  | 0.160 | .087845              | 1.495308 |
|                    | south east      | 1.983101   | 1.389928  | 0.98   | 0.329 | .5020529             | 7.833219 |
|                    | south west      | .7664997   | .5666354  | -0.36  | 0.719 | .1799951             | 3.264099 |
|                    | wales           | .6194918   | .5679473  | -0.52  | 0.601 | .1027207             | 3.736055 |
|                    | scotland        | .3523899   | .2866363  | -1.28  | 0.200 | .0715567             | 1.735387 |
| northern ireland   |                 | 1          | (omitted) |        |       |                      |          |

```
.
.
. * 10.2.5 Mundlak Correction
. *-----
.
. tabulate(wave), gen(Wave)
```

| wave  | Freq.  | Percent | Cum.   |
|-------|--------|---------|--------|
| 13    | 6,848  | 17.87   | 17.87  |
| 14    | 6,540  | 17.07   | 34.94  |
| 15    | 6,445  | 16.82   | 51.76  |
| 16    | 6,403  | 16.71   | 68.47  |
| 17    | 6,142  | 16.03   | 84.50  |
| 18    | 5,940  | 15.50   | 100.00 |
| Total | 38,318 | 100.00  |        |

```
. foreach v of varlist age age2 Married Q1-Q5 R1-R6 R8-R12 Wave* {
2.     bysort pid: egen M_`v'=mean(`v')
3. }
```

```
. xtprobit Employed `vlist' Wave2-Wave6 M_*, re
note: M_Wave6 omitted because of collinearity
```

Fitting comparison model:

Iteration 0: log likelihood = -24921.244  
Iteration 1: log likelihood = -15397.046

Iteration 2: log likelihood = -15138.351  
 Iteration 3: log likelihood = -15136.719  
 Iteration 4: log likelihood = -15136.719

Fitting full model:

rho = 0.0 log likelihood = -15136.719  
 rho = 0.1 log likelihood = -13625.736  
 rho = 0.2 log likelihood = -12688.159  
 rho = 0.3 log likelihood = -12046.911  
 rho = 0.4 log likelihood = -11589.642  
 rho = 0.5 log likelihood = -11263.477  
 rho = 0.6 log likelihood = -11044.534  
 rho = 0.7 log likelihood = -10935.733  
 rho = 0.8 log likelihood = -10995.247

Iteration 0: log likelihood = -10929.841  
 Iteration 1: log likelihood = -10110.119  
 Iteration 2: log likelihood = -9784.8156  
 Iteration 3: log likelihood = -9760.9239  
 Iteration 4: log likelihood = -9751.1837  
 Iteration 5: log likelihood = -9751.131  
 Iteration 6: log likelihood = -9751.131 (backed up)  
 Iteration 7: log likelihood = -9750.3281  
 Iteration 8: log likelihood = -9750.3278

Random-effects probit regression Number of obs = 38318  
 Group variable: pid Number of groups = 8593

Random effects u\_i ~ Gaussian Obs per group: min = 1  
 avg = 4.5  
 max = 6

Integration method: mvaghermite Integration points = 12

Log likelihood = -9750.3278 Wald chi2(48) = 3718.66  
 Prob > chi2 = 0.0000

|                    | Employed | Coef.     | Std. Err. | z      | P> z  | [95% Conf. Interval] |
|--------------------|----------|-----------|-----------|--------|-------|----------------------|
| age                |          | .5652383  | .0728419  | 7.76   | 0.000 | .4224707 .7080059    |
| c.age#c.age        |          | -.0065835 | .000288   | -22.86 | 0.000 | -.0071479 -.006019   |
| 1.Married          |          | .099356   | .0959195  | 1.04   | 0.300 | -.0886428 .2873548   |
| qfachi             |          |           |           |        |       |                      |
| 1st degree         |          | 4.232658  | .5683376  | 7.45   | 0.000 | 3.118737 5.346579    |
| hnd,hnc,teaching   |          | 2.742956  | .6076877  | 4.51   | 0.000 | 1.55191 3.934002     |
| a level            |          | 1.465578  | .5166143  | 2.84   | 0.005 | .4530322 2.478123    |
| o level            |          | .3419753  | .5059538  | 0.68   | 0.499 | -.6496758 1.333626   |
| none of these      |          | .6970707  | .5697084  | 1.22   | 0.221 | -.4195372 1.813679   |
| region2            |          |           |           |        |       |                      |
| north east         |          | -.2571044 | .6259599  | -0.41  | 0.681 | -1.483963 .9697544   |
| north west         |          | -.6277304 | .464556   | -1.35  | 0.177 | -1.538243 .2827825   |
| yorkshire & humber |          | -.8222363 | .516536   | -1.59  | 0.111 | -1.834628 .1901556   |
| east midlands      |          | -.227214  | .4831074  | -0.47  | 0.638 | -1.174087 .7196591   |
| west midlands      |          | -1.343629 | .4674112  | -2.87  | 0.004 | -2.259738 -.4275198  |
| east of england    |          | -.867251  | .4225616  | -2.05  | 0.040 | -1.695457 -.0390454  |
| south east         |          | .3716063  | .3850623  | 0.97   | 0.335 | -.383102 1.126315    |
| south west         |          | -.2320666 | .4154851  | -0.56  | 0.576 | -1.046403 .5822693   |
| wales              |          | -.3728875 | .5028273  | -0.74  | 0.458 | -1.358411 .612636    |
| scotland           |          | -.6053441 | .4694039  | -1.29  | 0.197 | -1.525359 .3146707   |
| northern ireland   |          | -.0945145 | 2.195178  | -0.04  | 0.966 | -4.396983 4.207955   |
| Wave2              |          | -.0127722 | .0861709  | -0.15  | 0.882 | -.1816641 .1561197   |
| Wave3              |          | -.064411  | .1487782  | -0.43  | 0.665 | -.356011 .227189     |
| Wave4              |          | -.1717028 | .215537   | -0.80  | 0.426 | -.5941475 .250742    |
| Wave5              |          | -.1678775 | .2843942  | -0.59  | 0.555 | -.7252799 .3895249   |
| Wave6              |          | -.3050086 | .3526126  | -0.86  | 0.387 | -.9961166 .3860994   |
| M_age              |          | .0269993  | .0738535  | 0.37   | 0.715 | -.1177508 .1717495   |





|           |           |           |       |       |           |           |
|-----------|-----------|-----------|-------|-------|-----------|-----------|
| Wave2     | -.0127722 | .0861709  | -0.15 | 0.882 | -.1816641 | .1561197  |
| Wave3     | -.064411  | .1487782  | -0.43 | 0.665 | -.356011  | .227189   |
| Wave4     | -.1717028 | .215537   | -0.80 | 0.426 | -.5941475 | .250742   |
| Wave5     | -.1678775 | .2843942  | -0.59 | 0.555 | -.7252799 | .3895249  |
| Wave6     | -.3050086 | .3526126  | -0.86 | 0.387 | -.9961166 | .3860994  |
| M_age     | .0269993  | .0738535  | 0.37  | 0.715 | -.1177508 | .1717495  |
| M_age2    | -.0008513 | .0003129  | -2.72 | 0.007 | -.0014645 | -.0002381 |
| M_Married | 1.547793  | .1351774  | 11.45 | 0.000 | 1.28285   | 1.812736  |
| M_Q1      | -1.862458 | .418599   | -4.45 | 0.000 | -2.682897 | -1.042019 |
| M_Q2      | -.680823  | .4962341  | -1.37 | 0.170 | -1.653424 | .2917779  |
| M_Q3      | .1856125  | .3475439  | 0.53  | 0.593 | -.495561  | .8667859  |
| M_Q4      | 1.599123  | .3449014  | 4.64  | 0.000 | .9231291  | 2.275118  |
| M_Q5      | 2.277463  | .5988547  | 3.80  | 0.000 | 1.103729  | 3.451196  |
| M_R1      | -.3844818 | .685642   | -0.56 | 0.575 | -1.728315 | .9593519  |
| M_R2      | .1035439  | .5140415  | 0.20  | 0.840 | -.903959  | 1.111047  |
| M_R3      | .4946604  | .5670241  | 0.87  | 0.383 | -.6166865 | 1.606007  |
| M_R4      | -.2686875 | .5367452  | -0.50 | 0.617 | -1.320689 | .7833137  |
| M_R5      | 1.251751  | .5257902  | 2.38  | 0.017 | .2212208  | 2.282281  |
| M_R6      | .8594509  | .4843154  | 1.77  | 0.076 | -.0897898 | 1.808692  |
| M_R8      | -.2853319 | .4432984  | -0.64 | 0.520 | -1.154181 | .583517   |
| M_R9      | .4628407  | .4804751  | 0.96  | 0.335 | -.4788732 | 1.404555  |
| M_R10     | -.1976931 | .5391961  | -0.37 | 0.714 | -1.254498 | .8591118  |
| M_R11     | .277421   | .5078214  | 0.55  | 0.585 | -.7178907 | 1.272733  |
| M_R12     | -.412574  | 2.203971  | -0.19 | 0.852 | -4.732279 | 3.907131  |
| M_Wave1   | .8542302  | .4500008  | 1.90  | 0.058 | -.0277553 | 1.736216  |
| M_Wave2   | .9750289  | .4444655  | 2.19  | 0.028 | .1038926  | 1.846165  |
| M_Wave3   | 1.733483  | .4265557  | 4.06  | 0.000 | .8974489  | 2.569516  |
| M_Wave4   | 1.360311  | .4033028  | 3.37  | 0.001 | .5698517  | 2.150769  |
| M_Wave5   | 1.132871  | .4463236  | 2.54  | 0.011 | .2580927  | 2.007649  |
| M_Wave6   | 0         | (omitted) |       |       |           |           |

-----  
Note: dy/dx for factor levels is the discrete change from the base level.

```
.
.
. * 10.2.6 Comparing Different Models
. *-----
.
. * Hausman tests
. xtlogit Employed `vlist', fe
note: multiple positive outcomes within groups encountered.
note: 7130 groups (30832 obs) dropped because of all positive or
      all negative outcomes.
note: 12.region2 omitted because of no within-group variance.
```

```
Iteration 0:  log likelihood =  -2680.58
Iteration 1:  log likelihood = -2270.8087
Iteration 2:  log likelihood = -2265.9408
Iteration 3:  log likelihood = -2265.8526
Iteration 4:  log likelihood = -2265.8525
```

```
Conditional fixed-effects logistic regression   Number of obs   =       7486
Group variable: pid                           Number of groups =       1463
```

```
Obs per group: min =         2
                avg  =        5.1
                max  =         6
```

```
Log likelihood = -2265.8525                LR chi2(18)      =    1103.35
                                           Prob > chi2     =     0.0000
```

| Employed         | Coef.     | Std. Err. | z      | P> z  | [95% Conf. Interval] |           |
|------------------|-----------|-----------|--------|-------|----------------------|-----------|
| age              | .9038244  | .0492833  | 18.34  | 0.000 | .8072309             | 1.000418  |
| c.age#c.age      | -.0124403 | .00056    | -22.22 | 0.000 | -.0135378            | -.0113427 |
| 1.Married        | .1434521  | .1787123  | 0.80   | 0.422 | -.2068175            | .4937218  |
| qfachi           |           |           |        |       |                      |           |
| 1st degree       | 5.656845  | 1.082142  | 5.23   | 0.000 | 3.535886             | 7.777804  |
| hnd,hnc,teaching | 3.764318  | 1.155121  | 3.26   | 0.001 | 1.500321             | 6.028314  |



|                    |           |          |        |       |           |           |
|--------------------|-----------|----------|--------|-------|-----------|-----------|
| hnd,hnc,teaching   | .2225392  | .3752402 | 0.59   | 0.553 | -.512918  | .9579965  |
| a level            | -.693804  | .3072645 | -2.26  | 0.024 | -1.296031 | -.0915767 |
| o level            | -.7839168 | .306808  | -2.56  | 0.011 | -1.385249 | -.1825842 |
| none of these      | -2.443259 | .3300875 | -7.40  | 0.000 | -3.090219 | -1.7963   |
| region2            |           |          |        |       |           |           |
| north east         | -1.129849 | .4885396 | -2.31  | 0.021 | -2.087369 | -.1723288 |
| north west         | -.9877462 | .3763174 | -2.62  | 0.009 | -1.725315 | -.2501777 |
| yorkshire & humber | -.7395821 | .3980645 | -1.86  | 0.063 | -1.519774 | .0406101  |
| east midlands      | -.6184952 | .4040202 | -1.53  | 0.126 | -1.41036  | .1733698  |
| west midlands      | -.5763159 | .4058969 | -1.42  | 0.156 | -1.371859 | .2192274  |
| east of england    | -.228451  | .3910278 | -0.58  | 0.559 | -.9948514 | .5379493  |
| south east         | .3358652  | .3656141 | 0.92   | 0.358 | -.3807252 | 1.052456  |
| south west         | .3695682  | .3955796 | 0.93   | 0.350 | -.4057535 | 1.14489   |
| wales              | -.9663107 | .3339831 | -2.89  | 0.004 | -1.620906 | -.3117159 |
| scotland           | -.6848658 | .3310538 | -2.07  | 0.039 | -1.333719 | -.0360124 |
| northern ireland   | -1.013426 | .3396893 | -2.98  | 0.003 | -1.679205 | -.3476471 |
| _cons              | -15.35734 | .6167925 | -24.90 | 0.000 | -16.56623 | -14.14845 |
| -----              |           |          |        |       |           |           |
| /lnsig2u           | 3.086158  | .0492891 |        |       | 2.989554  | 3.182763  |
| -----              |           |          |        |       |           |           |
| sigma_u            | 4.678976  | .1153113 |        |       | 4.458341  | 4.910529  |
| rho                | .8693599  | .0055979 |        |       | .8579914  | .8799457  |
| -----              |           |          |        |       |           |           |

Likelihood-ratio test of rho=0: chibar2(01) = 1.0e+04 Prob >= chibar2 = 0.000

. estimates store efficient

. hausman consistent efficient

Note: the rank of the differenced variance matrix (17) does not equal the number of coefficients being tested (18); be sure this is what you

expect, or there may be problems computing the test. Examine the output of your estimators for anything unexpected and possibly consider scaling your variables so that the coefficients are on a similar scale.

|             | ---- Coefficients ---- |           |            |                     |
|-------------|------------------------|-----------|------------|---------------------|
|             | (b)                    | (B)       | (b-B)      | sqrt(diag(V_b-V_B)) |
|             | consistent             | efficient | Difference | S.E.                |
| -----       |                        |           |            |                     |
| age         | .9038244               | 1.098885  | -.195061   | .039611             |
| c.age#c.age | -.0124403              | -.0135677 | .0011274   | .0004422            |
| 1.Married   | .1434521               | 1.540648  | -1.397196  | .118271             |
| qfachi      |                        |           |            |                     |
| 2           | 5.656845               | 1.424031  | 4.232814   | 1.027251            |
| 3           | 3.764318               | .2225392  | 3.541778   | 1.092474            |
| 4           | 2.337374               | -.693804  | 3.031178   | .9221445            |
| 5           | .3517841               | -.7839168 | 1.135701   | .8774385            |
| 7           | .7382407               | -2.443259 | 3.1815     | 1.011121            |
| region2     |                        |           |            |                     |
| 1           | -.5165676              | -1.129849 | .6132812   | 1.017533            |
| 2           | -.9780104              | -.9877462 | .0097358   | .7361773            |
| 3           | -1.45619               | -.7395821 | -.716608   | .9106754            |
| 4           | .0936151               | -.6184952 | .7121103   | .6825795            |
| 5           | -1.816572              | -.5763159 | -1.240256  | .7128038            |
| 6           | -1.014925              | -.228451  | -.7864736  | .6082566            |
| 8           | .6846618               | .3358652  | .3487967   | .5979697            |
| 9           | -.2659209              | .3695682  | -.6354892  | .6245064            |
| 10          | -.4788559              | -.9663107 | .4874549   | .8537969            |
| 11          | -1.043017              | -.6848658 | -.3581513  | .7429897            |
| -----       |                        |           |            |                     |

b = consistent under Ho and Ha; obtained from xtlogit  
B = inconsistent under Ha, efficient under Ho; obtained from xtlogit

Test: Ho: difference in coefficients not systematic

chi2(17) = (b-B)'[(V\_b-V\_B)^(-1)](b-B)  
= 242.51  
Prob>chi2 = 0.0000

.

```

. * 10.3 Panel Data Methods for Ordered Outcomes
. *-----
.
. generate Unemployed = 1 if jbstat == 3
(36806 missing values generated)

. replace Unemployed = 0 if jbstat == 1 | jbstat == 2
(24722 real changes made)

.
. tabulate lfsato

satisfaction with: life |
                        | overall | Freq.   Percent   Cum.
-----+-----
not satisfied at all    |         | 377      1.02      1.02
                        | 2       | 773      2.09      3.12
                        | 3       | 2,166    5.87      8.99
not satis/dissat        |         | 4,777    12.95     21.93
                        | 5       | 11,510   31.19     53.12
                        | 6       | 12,867   34.87     87.99
completely satisfied    |         | 4,430    12.01     100.00
-----+-----
                        | Total  | 36,900   100.00

.
. reoprob lfsato Unemployed age age2 Married R1-R6 R8-R12 ///
>           M_age M_age2 M_Married M_R* ///
>           if age >= 23, i(pid)

```

Fitting constant-only model:

```

Iteration 0:  log likelihood = -31821.781
Iteration 1:  log likelihood = -29745.874
Iteration 2:  log likelihood = -29647.379
Iteration 3:  log likelihood = -29646.651
Iteration 4:  log likelihood = -29646.651

```

Fitting full model:

```

Iteration 0:  log likelihood = -31365.225
Iteration 1:  log likelihood = -29445.339
Iteration 2:  log likelihood = -29325.613
Iteration 3:  log likelihood = -29325.06
Iteration 4:  log likelihood = -29325.06

```

|                               |               |   |        |
|-------------------------------|---------------|---|--------|
| Random Effects Ordered Probit | Number of obs | = | 23262  |
|                               | LR chi2(29)   | = | 643.18 |
| Log likelihood = -29325.06    | Prob > chi2   | = | 0.0000 |

| lfsato     | Coef.     | Std. Err. | z      | P> z  | [95% Conf. Interval] |           |
|------------|-----------|-----------|--------|-------|----------------------|-----------|
| eq1        |           |           |        |       |                      |           |
| Unemployed | -.641458  | .0490029  | -13.09 | 0.000 | -.7375018            | -.5454142 |
| age        | -.0742783 | .0189455  | -3.92  | 0.000 | -.1114108            | -.0371457 |
| age2       | .0006848  | .0002133  | 3.21   | 0.001 | .0002667             | .001103   |
| Married    | .4906649  | .0494225  | 9.93   | 0.000 | .3937986             | .5875312  |
| R1         | .2336418  | .4287209  | 0.54   | 0.586 | -.6066358            | 1.073919  |
| R2         | .4014544  | .3133202  | 1.28   | 0.200 | -.212642             | 1.015551  |
| R3         | .1814236  | .2609375  | 0.70   | 0.487 | -.3300045            | .6928518  |
| R4         | -.1458973 | .2538105  | -0.57  | 0.565 | -.6433567            | .3515621  |
| R5         | .0197443  | .3239403  | 0.06   | 0.951 | -.615167             | .6546557  |
| R6         | -.0669416 | .2245717  | -0.30  | 0.766 | -.5070941            | .3732109  |
| R8         | .1158148  | .19703    | 0.59   | 0.557 | -.2703569            | .5019864  |
| R9         | -.0272    | .2505617  | -0.11  | 0.914 | -.5182919            | .4638919  |
| R10        | .2156521  | .3364839  | 0.64   | 0.522 | -.4438443            | .8751485  |
| R11        | -.1963634 | .3123421  | -0.63  | 0.530 | -.8085427            | .415816   |
| R12        | 1.6997    | 1.093874  | 1.55   | 0.120 | -.4442543            | 3.843654  |
| M_age      | -.0306304 | .0202042  | -1.52  | 0.130 | -.0702298            | .0089691  |
| M_age2     | .000595   | .000227   | 2.62   | 0.009 | .0001501             | .0010399  |
| M_Married  | .0439069  | .0690544  | 0.64   | 0.525 | -.0914373            | .1792511  |
| M_R1       | -.2811159 | .457199   | -0.61  | 0.539 | -1.177209            | .6149776  |



|       |           |          |       |       |           |          |
|-------|-----------|----------|-------|-------|-----------|----------|
| R4    | -.1063485 | .1715688 | -0.62 | 0.535 | -.4426402 | .2299433 |
| R5    | -.0014966 | .227366  | -0.01 | 0.995 | -.4471562 | .4441631 |
| R6    | -.0881974 | .1544208 | -0.57 | 0.568 | -.3908774 | .2144825 |
| R8    | .0823724  | .1333633 | 0.62  | 0.537 | -.1790328 | .3437776 |
| R9    | -.0378014 | .1727258 | -0.22 | 0.827 | -.3763609 | .3007581 |
| R10   | .1780359  | .2336383 | 0.76  | 0.446 | -.2799181 | .6359899 |
| R11   | -.1404468 | .2143477 | -0.66 | 0.512 | -.5605892 | .2796957 |
| R12   | 1.298868  | .747108  | 1.74  | 0.082 | -.1655374 | 2.763273 |
| _cons | 4.884714  | .3276756 | 14.91 | 0.000 | 4.242437  | 5.52699  |

|         |           |                                   |
|---------|-----------|-----------------------------------|
| sigma_u | 1.0222044 |                                   |
| sigma_e | .74913496 |                                   |
| rho     | .65058128 | (fraction of variance due to u_i) |

F test that all u\_i=0: F(5564, 17682) = 5.27 Prob > F = 0.0000

```
. recode lfsato (0/3 = 0) (4/7 = 1), gen(satisf_dummy)
(23166 differences between lfsato and satisf_dummy)
```

```
. xtlogit satisf_dummy i.Unemployed age age2 i.Married ib7.region2 ///
> if age >= 23, or fe
note: multiple positive outcomes within groups encountered.
note: 3755 groups (14109 obs) dropped because of all positive or
all negative outcomes.
```

```
Iteration 0: log likelihood = -3448.1331
Iteration 1: log likelihood = -3433.8999
Iteration 2: log likelihood = -3433.4332
Iteration 3: log likelihood = -3433.3401
Iteration 4: log likelihood = -3433.3184
Iteration 5: log likelihood = -3433.3142
Iteration 6: log likelihood = -3433.3135
Iteration 7: log likelihood = -3433.3133
Iteration 8: log likelihood = -3433.3133
Iteration 9: log likelihood = -3433.3133
```

|                                               |                  |   |      |
|-----------------------------------------------|------------------|---|------|
| Conditional fixed-effects logistic regression | Number of obs    | = | 9153 |
| Group variable: pid                           | Number of groups | = | 1810 |

|                    |   |     |
|--------------------|---|-----|
| Obs per group: min | = | 2   |
| avg                | = | 5.1 |
| max                | = | 6   |

|                             |             |   |        |
|-----------------------------|-------------|---|--------|
| Log likelihood = -3433.3133 | LR chi2(15) | = | 87.90  |
|                             | Prob > chi2 | = | 0.0000 |

| satisf_dummy       | OR       | Std. Err. | z     | P> z  | [95% Conf. Interval] |          |
|--------------------|----------|-----------|-------|-------|----------------------|----------|
| 1.Unemployed       | .4211356 | .0636212  | -5.72 | 0.000 | .3132063             | .5662569 |
| age                | .9282021 | .0526572  | -1.31 | 0.189 | .8305268             | 1.037365 |
| age2               | 1.000681 | .0006532  | 1.04  | 0.297 | .9994015             | 1.001962 |
| 1.Married          | 2.372028 | .3311549  | 6.19  | 0.000 | 1.804201             | 3.118564 |
| region2            |          |           |       |       |                      |          |
| north east         | 2585503  | 2.14e+09  | 0.02  | 0.986 | 0                    | .        |
| north west         | .692595  | .8979902  | -0.28 | 0.777 | .0545565             | 8.792499 |
| yorkshire & humber | .7396605 | .5531982  | -0.40 | 0.687 | .1707701             | 3.203709 |
| east midlands      | .4059811 | .3432847  | -1.07 | 0.286 | .0774028             | 2.129388 |
| west midlands      | .361013  | .3678241  | -1.00 | 0.317 | .0490074             | 2.6594   |
| east of england    | .4168293 | .3150113  | -1.16 | 0.247 | .0947715             | 1.833322 |
| south east         | .8397615 | .5860959  | -0.25 | 0.802 | .2138335             | 3.29789  |
| south west         | .3565604 | .2561083  | -1.44 | 0.151 | .0872442             | 1.457235 |
| wales              | 1.112934 | 1.070098  | 0.11  | 0.911 | .1690559             | 7.326703 |
| scotland           | .8132682 | 1.000055  | -0.17 | 0.867 | .0730354             | 9.055958 |
| northern ireland   | 8.84e+12 | 1.56e+16  | 0.02  | 0.986 | 0                    | .        |

```
.
.
. erase temp.dta
```

```
. log close
  name: <unnamed>
  log: C:\My Documents\\Example_Chapter10.log
  log type: text
  closed on: 31 Jul 2014, 18:32:25
```

---
