# Supplementary material
Source: publisher site journal article supplement (https://uk.sagepub.com/sites/default/files/upm-binaries/74511_AppendixC_LogFiles.zip)
Supplement: Supplementary file 6 [file 74511_AppendixC_LogFiles.zip]

```
. replace Correctjbstat = jbstat if Correctjbstat >= . & wave != 1
(228732 real changes made)
```

```
. * Now attach the value labels to the new jbstat variable
. * First, find out the name of the label
. describe jbstat
```

| variable name | storage type | display format | value label | variable label            |
|---------------|--------------|----------------|-------------|---------------------------|
| jbstat        | byte         | %8.0g          | rjbstat     | current economic activity |

```
. label value Correctjbstat rjbstat
```

```
. * Alternatively:
. recode jbstat (5=6) (6=7) (7=8) (8=5) if wave == 1
(jbstat: 1809 changes made)
```

```
. tabulate Correctjbstat jbstat
```

| RECODE of jbstat<br>(current economic activity ) | current economic activity |     |         |           |           | Total   |
|--------------------------------------------------|---------------------------|-----|---------|-----------|-----------|---------|
|                                                  | missing o                 | -7  | refused | not answe | self-empl |         |
| missing or wild                                  | 91                        | 0   | 0       | 0         | 0         | 91      |
| -7                                               | 0                         | 352 | 0       | 0         | 0         | 352     |
| refused                                          | 0                         | 0   | 1       | 0         | 0         | 1       |
| not answered                                     | 0                         | 0   | 0       | 19        | 0         | 19      |
| self-employed                                    | 0                         | 0   | 0       | 0         | 16,671    | 16,671  |
| employed                                         | 0                         | 0   | 0       | 0         | 0         | 119,292 |
| unemployed                                       | 0                         | 0   | 0       | 0         | 0         | 9,080   |
| retired                                          | 0                         | 0   | 0       | 0         | 0         | 48,085  |
| maternity leave                                  | 0                         | 0   | 0       | 0         | 0         | 946     |
| family care                                      | 0                         | 0   | 0       | 0         | 0         | 18,238  |
| ft studt, school                                 | 0                         | 0   | 0       | 0         | 0         | 14,253  |
| lt sick, disabld                                 | 0                         | 0   | 0       | 0         | 0         | 10,351  |
| gvt trng scheme                                  | 0                         | 0   | 0       | 0         | 0         | 592     |
| other                                            | 0                         | 0   | 0       | 0         | 0         | 1,025   |
| Total                                            | 91                        | 352 | 1       | 19        | 16,671    | 238,996 |

| RECODE of jbstat<br>(current economic activity ) | current economic activity |           |         |           |           | Total   |
|--------------------------------------------------|---------------------------|-----------|---------|-----------|-----------|---------|
|                                                  | employed                  | unemploye | retired | maternity | family ca |         |
| missing or wild                                  | 0                         | 0         | 0       | 0         | 0         | 91      |
| -7                                               | 0                         | 0         | 0       | 0         | 0         | 352     |
| refused                                          | 0                         | 0         | 0       | 0         | 0         | 1       |
| not answered                                     | 0                         | 0         | 0       | 0         | 0         | 19      |
| self-employed                                    | 0                         | 0         | 0       | 0         | 0         | 16,671  |
| employed                                         | 119,292                   | 0         | 0       | 0         | 0         | 119,292 |
| unemployed                                       | 0                         | 9,080     | 0       | 0         | 0         | 9,080   |
| retired                                          | 0                         | 0         | 48,085  | 0         | 0         | 48,085  |
| maternity leave                                  | 0                         | 0         | 0       | 946       | 0         | 946     |
| family care                                      | 0                         | 0         | 0       | 0         | 18,238    | 18,238  |
| ft studt, school                                 | 0                         | 0         | 0       | 0         | 0         | 14,253  |
| lt sick, disabld                                 | 0                         | 0         | 0       | 0         | 0         | 10,351  |
| gvt trng scheme                                  | 0                         | 0         | 0       | 0         | 0         | 592     |
| other                                            | 0                         | 0         | 0       | 0         | 0         | 1,025   |
| Total                                            | 119,292                   | 9,080     | 48,085  | 946       | 18,238    | 238,996 |

| RECODE of jbstat<br>(current economic activity ) | current economic activity |          |          |       | Total |
|--------------------------------------------------|---------------------------|----------|----------|-------|-------|
|                                                  | ft studt,                 | lt sick, | gvt trng | other |       |
| missing or wild                                  | 0                         | 0        | 0        | 0     | 91    |
| -7                                               | 0                         | 0        | 0        | 0     | 352   |
| refused                                          | 0                         | 0        | 0        | 0     | 1     |
| not answered                                     | 0                         | 0        | 0        | 0     | 19    |

|                  |        |        |     |       |         |
|------------------|--------|--------|-----|-------|---------|
| self-employed    | 0      | 0      | 0   | 0     | 16,671  |
| employed         | 0      | 0      | 0   | 0     | 119,292 |
| unemployed       | 0      | 0      | 0   | 0     | 9,080   |
| retired          | 0      | 0      | 0   | 0     | 48,085  |
| maternity leave  | 0      | 0      | 0   | 0     | 946     |
| family care      | 0      | 0      | 0   | 0     | 18,238  |
| ft studt, school | 14,253 | 0      | 0   | 0     | 14,253  |
| lt sick, disabl  | 0      | 10,351 | 0   | 0     | 10,351  |
| gvt trng scheme  | 0      | 0      | 592 | 0     | 592     |
| other            | 0      | 0      | 0   | 1,025 | 1,025   |
| Total            | 14,253 | 10,351 | 592 | 1,025 | 238,996 |

```
.
.
.
. * 4.5. Recoding variables and identifying the data as a panel
. *-----
```

```
. mvdecode _all, mv(-9/-1)
  sex: 2094 missing values generated
 jbstat: 463 missing values generated
 jbsoc: 106897 missing values generated
 jbsemp: 95040 missing values generated
 mastat: 54 missing values generated
  age: 9 missing values generated
 region: 1262 missing values generated
 qfachi: 13759 missing values generated
 jbft: 99090 missing values generated
 paygu: 118881 missing values generated
 cjsten: 15239 missing values generated
 jbbgy4: 119092 missing values generated
Correctjbs~t: 463 missing values generated
```

```
. save "$dirresults\DataFile", replace
file C:\My Documents\DataFile.dta saved
```

```
. * Save for use in later chapters
.
. describe
```

```
Contains data from C:\My Documents\DataFile.dta
  obs:      238,996
  vars:      16
  size:      8,125,864
                                30 Jul 2014 09:37
```

| variable name | storage type | display format | value label | variable label                                |
|---------------|--------------|----------------|-------------|-----------------------------------------------|
| hid           | long         | %12.0g         |             | household identification number               |
| sex           | byte         | %8.0g          | rsex        | sex                                           |
| jbstat        | byte         | %8.0g          | rjbstat     | current economic activity                     |
| jbsoc         | int          | %8.0g          | rjbsoc      | occupation (soc): current main job            |
| jbsemp        | byte         | %8.0g          | rjbsemp     | employee or self-employed: current job        |
| pid           | long         | %12.0g         |             | cross-wave person identifier                  |
| mastat        | byte         | %8.0g          | rmastat     | marital status                                |
| age           | int          | %8.0g          | rage        | age at date of interview                      |
| region        | byte         | %8.0g          | rregion     | region / metropolitan area                    |
| qfachi        | byte         | %8.0g          | rqfachi     | highest academic qualification                |
| jbft          | byte         | %8.0g          | rjbft       | employed full time                            |
| paygu         | float        | %9.0g          | rpaygu      | usual gross pay per month: current job        |
| cjsten        | long         | %8.0g          | rcjsten     | length (days) current labour market sp.       |
| jbbgy4        | int          | %8.0g          | rjbbgy4     | year started current job                      |
| wave          | float        | %9.0g          |             |                                               |
| Correctjbstat | byte         | %23.0g         | rjbstat     | RECODE of jbstat (current economic activity ) |

```
Sorted by:
```

```
. sort pid wave
. compress
```

wave was float now byte  
(716,988 bytes saved)

```
.
. tsset pid wave
    panel variable:  pid (unbalanced)
    time variable:  wave, 1 to 18, but with gaps
                  delta:  1 unit

. xtsum
```

| Variable |         | Mean     | Std. Dev. | Min       | Max      | Observations    |
|----------|---------|----------|-----------|-----------|----------|-----------------|
| hid      | overall | 1.08e+07 | 4940804   | 1000209   | 1.89e+07 | N = 238996      |
|          | between |          | 4317334   | 1000209   | 1.89e+07 | n = 32380       |
|          | within  |          | 3760499   | -1328915  | 2.31e+07 | T-bar = 7.38098 |
| sex      | overall | 1.538223 | .4985379  | 1         | 2        | N = 236902      |
|          | between |          | .4994418  | 1         | 2        | n = 32336       |
|          | within  |          | 0         | 1.538223  | 1.538223 | T-bar = 7.32626 |
| jbstat   | overall | 3.299963 | 1.983959  | 1         | 10       | N = 238533      |
|          | between |          | 1.850063  | 1         | 10       | n = 32290       |
|          | within  |          | 1.221509  | -3.311148 | 11.77055 | T-bar = 7.38721 |
| jbsoc    | overall | 497.3981 | 250.9133  | 100       | 999      | N = 132099      |
|          | between |          | 219.094   | 101       | 999      | n = 19746       |
|          | within  |          | 141.8367  | -258.1019 | 1314.676 | T-bar = 6.68991 |
| jbsemp   | overall | 1.123934 | .329507   | 1         | 2        | N = 143956      |
|          | between |          | .2870082  | 1         | 2        | n = 22446       |
|          | within  |          | .1664814  | .1794893  | 2.068378 | T-bar = 6.41344 |
| pid      | overall | 4.85e+07 | 4.39e+07  | 1.00e+07  | 1.89e+08 | N = 238996      |
|          | between |          | 4.83e+07  | 1.00e+07  | 1.89e+08 | n = 32380       |
|          | within  |          | 0         | 4.85e+07  | 4.85e+07 | T-bar = 7.38098 |
| mastat   | overall | 2.539056 | 2.055286  | 0         | 98       | N = 238942      |
|          | between |          | 2.06646   | 0         | 21.33333 | n = 32379       |
|          | within  |          | .9152662  | -12.79428 | 85.20572 | T-bar = 7.37954 |
| age      | overall | 45.27792 | 18.64392  | 15        | 101      | N = 238987      |
|          | between |          | 19.69943  | 15        | 97.33333 | n = 32379       |
|          | within  |          | 3.860061  | -7.903895 | 60.2191  | T-bar = 7.38093 |
| region   | overall | 11.0386  | 6.41263   | 1         | 19       | N = 237734      |
|          | between |          | 6.425193  | 1         | 19       | n = 32341       |
|          | within  |          | .9218502  | -4.072513 | 26.87193 | T-bar = 7.35085 |
| qfachi   | overall | 5.017843 | 1.742446  | 1         | 7        | N = 225237      |
|          | between |          | 1.689611  | 1         | 7        | n = 30946       |
|          | within  |          | .342308   | -.2321566 | 10.26784 | T-bar = 7.27839 |
| jbft     | overall | 1.231763 | .4219598  | 1         | 2        | N = 139906      |
|          | between |          | .3847776  | 1         | 2        | n = 22084       |
|          | within  |          | .255943   | .2873183  | 2.176207 | T-bar = 6.33517 |
| paygu    | overall | 1335.755 | 1104.061  | .0833333  | 72055.43 | N = 120115      |
|          | between |          | 868.1677  | 4.333333  | 14064    | n = 20167       |
|          | within  |          | 641.6543  | -8009.365 | 65521.23 | T-bar = 5.95602 |
| cjsten   | overall | 2826.88  | 3427.379  | 0         | 33416    | N = 223757      |
|          | between |          | 3231.031  | 0         | 28748    | n = 31169       |
|          | within  |          | 1729.933  | -15149.41 | 33775.06 | T-bar = 7.17883 |
| jbbgy4   | overall | 1995.927 | 7.694058  | 1941      | 2009     | N = 119904      |
|          | between |          | 7.403037  | 1944.333  | 2009     | n = 20038       |
|          | within  |          | 4.259295  | 1958.07   | 2037.594 | T-bar = 5.98383 |
| wave     | overall | 10.43351 | 4.947756  | 1         | 18       | N = 238996      |
|          | between |          | 4.27356   | 1         | 18       | n = 32380       |
|          | within  |          | 3.838481  | -1.995066 | 22.86208 | T-bar = 7.38098 |

```

Correc~t overall | 3.299963 1.983959 1 10 | N = 238533
between | 1.850063 1 10 | n = 32290
within | 1.221509 -3.311148 11.77055 | T-bar = 7.38721

```

```
. xtides
```

```

pid: 10002251, 10004491, ..., 1.893e+08 n = 32380
wave: 1, 2, ..., 18 T = 18
Delta(wave) = 1 unit
Span(wave) = 18 periods
(pid*wave uniquely identifies each observation)

```

```

Distribution of T_i: min 5% 25% 50% 75% 95% max
                    1 1 2 6 10 18 18

```

| Freq. | Percent | Cum.   | Pattern              |
|-------|---------|--------|----------------------|
| 4098  | 12.66   | 12.66  | 111111111111111111   |
| 2559  | 7.90    | 20.56  | .....1111111111      |
| 1871  | 5.78    | 26.34  | .....11111111        |
| 1224  | 3.78    | 30.12  | .....11111.....      |
| 964   | 2.98    | 33.09  | 1.....               |
| 840   | 2.59    | 35.69  | .....1.....          |
| 632   | 1.95    | 37.64  | .....1.....          |
| 593   | 1.83    | 39.47  | 11.....              |
| 505   | 1.56    | 41.03  | .....1               |
| 19094 | 58.97   | 100.00 | (other patterns)     |
| 32380 | 100.00  |        | XXXXXXXXXXXXXXXXXXXX |

```
. iis
```

```
i() is pid
```

```
. tis
```

```
t() is wave
```

```
.
* 4.6. Computing changes over time
* -----
```

```
.
. recode paygu -9/-1 = .
(paygu: 0 changes made)
```

```
.
. generate paych = paygu - L.paygu
(145312 missing values generated)
```

```
. label var paych "Change in pay"
```

```
.
. tabulate sex, sum(paych)
```

| sex    | Summary of Change in pay |           |       |
|--------|--------------------------|-----------|-------|
|        | Mean                     | Std. Dev. | Freq. |
| male   | 103.65392                | 853.93596 | 44890 |
| female | 67.852064                | 600.48718 | 48794 |
| Total  | 85.007024                | 733.16378 | 93684 |

```
.
. tabulate mastat
```

| marital status       | Freq.   | Percent | Cum.   |
|----------------------|---------|---------|--------|
| child under 16       | 523     | 0.22    | 0.22   |
| married              | 127,836 | 53.50   | 53.72  |
| living as couple     | 25,213  | 10.55   | 64.27  |
| widowed              | 18,304  | 7.66    | 71.93  |
| divorced             | 12,636  | 5.29    | 77.22  |
| separated            | 4,042   | 1.69    | 78.91  |
| never married        | 50,332  | 21.06   | 99.98  |
| civil partnership    | 47      | 0.02    | 100.00 |
| dissolved civil part | 1       | 0.00    | 100.00 |

```

sep from civil part      |          2          0.00      100.00
survive from civ par     |          2          0.00      100.00
                        98 |          4          0.00      100.00
-----+-----
                        Total |      238,942      100.00

```

```

. recode mastat (0 98 = .) (1 2 7 = 1) (3/5 8/10 = 2) (6 = 3), gen(ma)
(111106 differences between mastat and ma)

```

```

. generate mach = (10*ma) + L.ma
(36870 missing values generated)

```

```

. tabulate mach

```

```

      mach |      Freq.      Percent      Cum.
-----+-----
      11 |    129,300      63.97      63.97
      12 |     1,302       0.64      64.61
      13 |     2,715       1.34      65.96
      21 |     2,442       1.21      67.17
      22 |    28,060     13.88      81.05
      23 |       158       0.08      81.13
      31 |     1,021       0.51      81.63
      32 |       138       0.07      81.70
      33 |    36,990     18.30     100.00
-----+-----
      Total |    202,126     100.00

```

```

.
. label var ma "marital status"

. label define malab 1 "married, living as couple"      ///
>      2 "widowed, divorced or separated"              ///
>      3 " never married"

```

```

. label value ma malab

```

```

.
. tabulate ma

```

```

      marital status |      Freq.      Percent      Cum.
-----+-----
      married, living as couple |    153,096      64.21      64.21
widowed, divorced or separated |     34,987     14.67      78.89
      never married |     50,332     21.11     100.00
-----+-----
                        Total |    238,415     100.00

```

```

. sort wave hid

```

```

. list ma in 1/20, sepby(hid)

```

```

+-----+
|          ma          |
+-----+
1. | never married |
+-----+
2. | never married |
3. | never married |
+-----+
4. | widowed, divorced or separated |
+-----+
5. | married, living as couple |
6. | married, living as couple |
+-----+
7. | married, living as couple |
8. | married, living as couple |
+-----+
9. | married, living as couple |
10. | married, living as couple |
+-----+
11. | never married |
+-----+

```

```

12. |           never married |
13. | widowed, divorced or separated |
14. | widowed, divorced or separated |
   |-----|
15. |           never married |
16. |           never married |
   |-----|
17. |           never married |
   |-----|
18. |           never married |
19. |           never married |
   |-----|
20. |           never married |
   |-----|

```

```

.
. xttrans ma

```

| marital status | marital status |       |       | Total  |
|----------------|----------------|-------|-------|--------|
|                | 1              | 2     | 3     |        |
| 1              | 97.23          | 1.97  | 0.81  | 100.00 |
| 2              | 4.51           | 94.99 | 0.50  | 100.00 |
| 3              | 7.15           | 0.41  | 92.44 | 100.00 |
| Total          | 65.77          | 15.15 | 19.09 | 100.00 |

```

. table ma sex, contents(mean paych n paych) format(%9.2f)

```

| marital status                 | sex             |                 |
|--------------------------------|-----------------|-----------------|
|                                | male            | female          |
| married, living as couple      | 98.09<br>32,856 | 59.06<br>34,546 |
| widowed, divorced or separated | 75.52<br>2,314  | 50.22<br>5,296  |
| never married                  | 129.21<br>9,717 | 112.26<br>8,948 |

```

.
.
. * 4.7. Graphically analysing panel data
. *-----
.
. set more on

.
. kdensity paygu, title(Distribution of Wages 1991-2008) scheme(s1manual)

. more

. kdensity paygu if wave == 15, title(Distribution of Wages 2005) scheme(s1manual)

. more

. histogram paygu, scheme(s1manual) ///
> by(wave, title(Distribution of Wages 1991-2008))

. more

.
. keep if jbstat == 2
(119704 observations deleted)

. drop if paygu == .
(7394 observations deleted)

.

```

```

. * Figure 4.8
. twoway (kdensity paygu if wave == 1, lcolor(black)) ///
>      (kdensity paygu if wave == 8, lcolor(gs4) lp(dash)) ///
>      (kdensity paygu if wave == 17, lcolor(gs10)), ///
>      scheme(s1manual) ///
>      ytitle(Density) xtitle(Wage) title(Distribution of Wages)

. more

.
. * Figure 4.9
. twoway (kdensity paygu if wave == 1, lcolor(black)) ///
>      (kdensity paygu if wave == 8, lcolor(gs4) lp(dash)) ///
>      (kdensity paygu if wave == 17, lcolor(gs10) lwidth(thick)) ///
>      if paygu <= 5000, ///
>      legend(label(1 "Wage 1991") label(2 "Wage 1998") ///
>              label(3 "Wage 2007")) ///
>      scheme(s1manual) ytitle(Density) xtitle(Wage) ///
>      title(Distribution of Wages)

. more

.
. * Figure 4.10
. twoway (kdensity paygu if wave == 1, lcolor(black)) ///
>      (kdensity paygu if wave == 8, lcolor(gs4) lp(dash)) ///
>      (kdensity paygu if wave == 17, lcolor(gs10) lwidth(thick)) ///
>      if paygu <= 5000, ///
>      legend(label(1 "Wage 1991") label(2 "Wage 1998") ///
>              label(3 "Wage 2007")) ///
>      scheme(s1manual) ytitle(Density) xtitle(Wage) ///
>      by(sex, title(Distribution of Wages))

.
. log close
      name: <unnamed>
      log: C:\My Documents\\Example_Chapter4.log
      log type: text
      closed on: 30 Jul 2014, 09:39:21
-----

```
