# Supplementary material
Source: publisher site journal article supplement (https://uk.sagepub.com/sites/default/files/upm-binaries/74511_AppendixC_LogFiles.zip)
Supplement: Supplementary file 7 [file 74511_AppendixC_LogFiles.zip]

```
*****
* A Practical Guide to Using Panel Data
* Simonetta Longhi and Alita Nandi
* ISER, University of Essex
* Chapter 12
*****
```

```
-----
name: <unnamed>
log: C:\My Documents\\Example_Chapter12.log
log type: text
opened on: 30 Jul 2014, 08:34:17
```

```
.
. * 12.1. Merging Data on Previous Spell to Data on Current Spell
. *-----
.
. use pid ajspno ajhstat ajhbgm ajhbggy4 ajhstpy ajhendd ajhendm ajhendy4 ///
>      ajha9ly      ///
>      using "$datadir/ajobhist", clear
```

```
. generate wave = 1
```

```
. renpfix a
```

```
. mvdecode _all, mv(-9/-1)
      jhstat: 62 missing values generated
      jhbgm: 303 missing values generated
      jha9ly: 1304 missing values generated
      jhstpy: 1328 missing values generated
      jhendd: 880 missing values generated
      jhendm: 24 missing values generated
      jhbggy4: 96 missing values generated
      jhendy4: 20 missing values generated
```

```
. describe
```

```
Contains data from S:\final/ajobhist.dta
obs:      3,382
vars:      11
size:     64,258
```

```
-----
variable name      storage   display   value    variable label
                   type      format    label
-----
jspno              byte      %8.0g    ajhstat   spell number of labour force status
jhstat            byte      %8.0g    ajhbgm    labour force status code
jhbgm             byte      %8.0g    ajha9ly   month labour force spell began
jha9ly            byte      %8.0g    ajhstpy   whether job started after 1.9.90
jhstpy            byte      %8.0g    ajhendd   reason for stopping previous job
jhendd            byte      %8.0g    ajhendm   day labour force spell ended
jhendm            byte      %8.0g    ajhbggy4  month labour force spell ended
jhbggy4           int       %8.0g    ajhendy4  year labour force spell began: 4 digit
jhendy4           int       %8.0g    ajhendy4  year labour force spell ended: 4 digit
pid               long      %12.0g   cross-wave person identifier
wave              float     %9.0g
```

```
Sorted by:
Note: dataset has changed since last saved
```

```
.
. * What is the maximum number of spells?
. tabulate jspno
```

```
      spell |
number of  |
labour     |
force      |
status     |      Freq.    Percent    Cum.
-----
```

|       |       |        |        |
|-------|-------|--------|--------|
| 1     | 2,362 | 69.84  | 69.84  |
| 2     | 683   | 20.20  | 90.04  |
| 3     | 220   | 6.51   | 96.54  |
| 4     | 76    | 2.25   | 98.79  |
| 5     | 25    | 0.74   | 99.53  |
| 6     | 11    | 0.33   | 99.85  |
| 7     | 5     | 0.15   | 100.00 |
| Total | 3,382 | 100.00 |        |

```
. * How many respondents have only one recorded spell?
. bysort pid: generate TotSpells = _N
```

```
. tabulate TotSpells
```

| TotSpells | Freq. | Percent | Cum.   |
|-----------|-------|---------|--------|
| 1         | 1,679 | 49.65   | 49.65  |
| 2         | 926   | 27.38   | 77.03  |
| 3         | 432   | 12.77   | 89.80  |
| 4         | 204   | 6.03    | 95.83  |
| 5         | 70    | 2.07    | 97.90  |
| 6         | 36    | 1.06    | 98.97  |
| 7         | 35    | 1.03    | 100.00 |
| Total     | 3,382 | 100.00  |        |

```
.
. * Month and year in which the spell started and ended
```

```
.
. generate previous_spellbegin = ym(jhbgy4, jhbgm)
(305 missing values generated)
```

```
. tabulate previous_spellbegin
```

| previous_spellbegin | Freq. | Percent | Cum. |
|---------------------|-------|---------|------|
| -180                | 1     | 0.03    | 0.03 |
| -159                | 1     | 0.03    | 0.06 |
| -142                | 1     | 0.03    | 0.10 |
| -86                 | 1     | 0.03    | 0.13 |
| -77                 | 1     | 0.03    | 0.16 |
| -71                 | 1     | 0.03    | 0.19 |
| -69                 | 1     | 0.03    | 0.23 |
| -17                 | 1     | 0.03    | 0.26 |
| -15                 | 1     | 0.03    | 0.29 |
| -9                  | 1     | 0.03    | 0.32 |
| -7                  | 1     | 0.03    | 0.36 |
| -4                  | 1     | 0.03    | 0.39 |
| 0                   | 4     | 0.13    | 0.52 |
| 4                   | 1     | 0.03    | 0.55 |
| 8                   | 1     | 0.03    | 0.58 |
| 12                  | 1     | 0.03    | 0.62 |
| 14                  | 1     | 0.03    | 0.65 |
| 20                  | 1     | 0.03    | 0.68 |
| 37                  | 1     | 0.03    | 0.71 |
| 49                  | 1     | 0.03    | 0.75 |
| 51                  | 1     | 0.03    | 0.78 |
| 58                  | 2     | 0.06    | 0.84 |
| 62                  | 1     | 0.03    | 0.88 |
| 74                  | 1     | 0.03    | 0.91 |
| 82                  | 1     | 0.03    | 0.94 |
| 87                  | 1     | 0.03    | 0.97 |
| 92                  | 1     | 0.03    | 1.01 |
| 93                  | 1     | 0.03    | 1.04 |
| 94                  | 1     | 0.03    | 1.07 |
| 95                  | 1     | 0.03    | 1.10 |
| 100                 | 1     | 0.03    | 1.14 |
| 103                 | 2     | 0.06    | 1.20 |
| 104                 | 3     | 0.10    | 1.30 |
| 109                 | 1     | 0.03    | 1.33 |

|     |   |      |      |
|-----|---|------|------|
| 114 | 1 | 0.03 | 1.36 |
| 115 | 2 | 0.06 | 1.43 |
| 116 | 1 | 0.03 | 1.46 |
| 122 | 1 | 0.03 | 1.49 |
| 123 | 1 | 0.03 | 1.53 |
| 124 | 1 | 0.03 | 1.56 |
| 125 | 1 | 0.03 | 1.59 |
| 126 | 1 | 0.03 | 1.62 |
| 127 | 1 | 0.03 | 1.66 |
| 128 | 2 | 0.06 | 1.72 |
| 134 | 2 | 0.06 | 1.79 |
| 135 | 2 | 0.06 | 1.85 |
| 136 | 2 | 0.06 | 1.92 |
| 137 | 1 | 0.03 | 1.95 |
| 139 | 2 | 0.06 | 2.01 |
| 144 | 2 | 0.06 | 2.08 |
| 149 | 1 | 0.03 | 2.11 |
| 150 | 2 | 0.06 | 2.18 |
| 151 | 2 | 0.06 | 2.24 |
| 152 | 2 | 0.06 | 2.31 |
| 153 | 1 | 0.03 | 2.34 |
| 157 | 1 | 0.03 | 2.37 |
| 158 | 1 | 0.03 | 2.40 |
| 160 | 1 | 0.03 | 2.44 |
| 161 | 2 | 0.06 | 2.50 |
| 165 | 1 | 0.03 | 2.53 |
| 166 | 1 | 0.03 | 2.57 |
| 167 | 1 | 0.03 | 2.60 |
| 168 | 2 | 0.06 | 2.66 |
| 170 | 1 | 0.03 | 2.70 |
| 171 | 3 | 0.10 | 2.79 |
| 172 | 1 | 0.03 | 2.83 |
| 173 | 2 | 0.06 | 2.89 |
| 174 | 1 | 0.03 | 2.92 |
| 175 | 1 | 0.03 | 2.96 |
| 176 | 1 | 0.03 | 2.99 |
| 178 | 1 | 0.03 | 3.02 |
| 180 | 1 | 0.03 | 3.05 |
| 182 | 1 | 0.03 | 3.09 |
| 183 | 2 | 0.06 | 3.15 |
| 185 | 2 | 0.06 | 3.22 |
| 186 | 1 | 0.03 | 3.25 |
| 188 | 2 | 0.06 | 3.31 |
| 191 | 1 | 0.03 | 3.35 |
| 192 | 1 | 0.03 | 3.38 |
| 195 | 2 | 0.06 | 3.44 |
| 197 | 1 | 0.03 | 3.48 |
| 198 | 1 | 0.03 | 3.51 |
| 199 | 1 | 0.03 | 3.54 |
| 200 | 4 | 0.13 | 3.67 |
| 201 | 1 | 0.03 | 3.70 |
| 202 | 3 | 0.10 | 3.80 |
| 204 | 1 | 0.03 | 3.83 |
| 205 | 2 | 0.06 | 3.90 |
| 206 | 1 | 0.03 | 3.93 |
| 207 | 1 | 0.03 | 3.96 |
| 208 | 2 | 0.06 | 4.03 |
| 209 | 2 | 0.06 | 4.09 |
| 211 | 2 | 0.06 | 4.16 |
| 212 | 5 | 0.16 | 4.32 |
| 216 | 1 | 0.03 | 4.35 |
| 217 | 2 | 0.06 | 4.42 |
| 218 | 4 | 0.13 | 4.55 |
| 219 | 2 | 0.06 | 4.61 |
| 221 | 1 | 0.03 | 4.65 |
| 222 | 2 | 0.06 | 4.71 |
| 223 | 5 | 0.16 | 4.87 |
| 224 | 7 | 0.23 | 5.10 |
| 225 | 2 | 0.06 | 5.17 |
| 226 | 2 | 0.06 | 5.23 |
| 227 | 1 | 0.03 | 5.26 |
| 228 | 3 | 0.10 | 5.36 |
| 229 | 2 | 0.06 | 5.43 |

|     |    |      |       |
|-----|----|------|-------|
| 230 | 4  | 0.13 | 5.56  |
| 231 | 2  | 0.06 | 5.62  |
| 232 | 3  | 0.10 | 5.72  |
| 233 | 3  | 0.10 | 5.82  |
| 234 | 2  | 0.06 | 5.88  |
| 235 | 2  | 0.06 | 5.95  |
| 236 | 28 | 0.91 | 6.86  |
| 238 | 1  | 0.03 | 6.89  |
| 239 | 1  | 0.03 | 6.92  |
| 240 | 3  | 0.10 | 7.02  |
| 241 | 2  | 0.06 | 7.08  |
| 242 | 2  | 0.06 | 7.15  |
| 243 | 5  | 0.16 | 7.31  |
| 244 | 3  | 0.10 | 7.41  |
| 245 | 1  | 0.03 | 7.44  |
| 246 | 3  | 0.10 | 7.54  |
| 247 | 2  | 0.06 | 7.60  |
| 248 | 28 | 0.91 | 8.51  |
| 249 | 4  | 0.13 | 8.64  |
| 250 | 3  | 0.10 | 8.74  |
| 252 | 1  | 0.03 | 8.77  |
| 253 | 1  | 0.03 | 8.81  |
| 254 | 1  | 0.03 | 8.84  |
| 255 | 3  | 0.10 | 8.94  |
| 258 | 5  | 0.16 | 9.10  |
| 260 | 2  | 0.06 | 9.16  |
| 261 | 1  | 0.03 | 9.20  |
| 262 | 1  | 0.03 | 9.23  |
| 264 | 2  | 0.06 | 9.29  |
| 265 | 2  | 0.06 | 9.36  |
| 266 | 3  | 0.10 | 9.46  |
| 267 | 3  | 0.10 | 9.55  |
| 268 | 4  | 0.13 | 9.68  |
| 269 | 2  | 0.06 | 9.75  |
| 271 | 1  | 0.03 | 9.78  |
| 272 | 6  | 0.19 | 9.98  |
| 273 | 3  | 0.10 | 10.07 |
| 275 | 1  | 0.03 | 10.11 |
| 276 | 4  | 0.13 | 10.24 |
| 277 | 3  | 0.10 | 10.33 |
| 278 | 3  | 0.10 | 10.43 |
| 279 | 1  | 0.03 | 10.46 |
| 280 | 4  | 0.13 | 10.59 |
| 281 | 4  | 0.13 | 10.72 |
| 283 | 2  | 0.06 | 10.79 |
| 284 | 7  | 0.23 | 11.02 |
| 285 | 1  | 0.03 | 11.05 |
| 287 | 3  | 0.10 | 11.15 |
| 288 | 2  | 0.06 | 11.21 |
| 289 | 3  | 0.10 | 11.31 |
| 290 | 1  | 0.03 | 11.34 |
| 291 | 1  | 0.03 | 11.37 |
| 292 | 2  | 0.06 | 11.44 |
| 293 | 1  | 0.03 | 11.47 |
| 294 | 4  | 0.13 | 11.60 |
| 295 | 7  | 0.23 | 11.83 |
| 296 | 6  | 0.19 | 12.02 |
| 297 | 4  | 0.13 | 12.15 |
| 298 | 4  | 0.13 | 12.28 |
| 299 | 2  | 0.06 | 12.35 |
| 300 | 3  | 0.10 | 12.45 |
| 301 | 2  | 0.06 | 12.51 |
| 302 | 4  | 0.13 | 12.64 |
| 303 | 5  | 0.16 | 12.80 |
| 304 | 7  | 0.23 | 13.03 |
| 305 | 6  | 0.19 | 13.23 |
| 306 | 7  | 0.23 | 13.45 |
| 307 | 4  | 0.13 | 13.58 |
| 308 | 21 | 0.68 | 14.27 |
| 309 | 8  | 0.26 | 14.53 |
| 310 | 4  | 0.13 | 14.66 |
| 311 | 1  | 0.03 | 14.69 |
| 312 | 9  | 0.29 | 14.98 |

|       |       |        |        |
|-------|-------|--------|--------|
| 313   | 11    | 0.36   | 15.34  |
| 314   | 9     | 0.29   | 15.63  |
| 315   | 11    | 0.36   | 15.99  |
| 316   | 5     | 0.16   | 16.15  |
| 317   | 10    | 0.32   | 16.48  |
| 318   | 3     | 0.10   | 16.57  |
| 319   | 10    | 0.32   | 16.90  |
| 320   | 29    | 0.94   | 17.84  |
| 321   | 4     | 0.13   | 17.97  |
| 322   | 5     | 0.16   | 18.13  |
| 323   | 2     | 0.06   | 18.20  |
| 324   | 14    | 0.45   | 18.65  |
| 325   | 4     | 0.13   | 18.78  |
| 326   | 4     | 0.13   | 18.91  |
| 327   | 9     | 0.29   | 19.21  |
| 328   | 4     | 0.13   | 19.34  |
| 329   | 12    | 0.39   | 19.73  |
| 330   | 10    | 0.32   | 20.05  |
| 331   | 13    | 0.42   | 20.47  |
| 332   | 18    | 0.58   | 21.06  |
| 333   | 17    | 0.55   | 21.61  |
| 334   | 7     | 0.23   | 21.84  |
| 335   | 5     | 0.16   | 22.00  |
| 336   | 25    | 0.81   | 22.81  |
| 337   | 11    | 0.36   | 23.17  |
| 338   | 20    | 0.65   | 23.82  |
| 339   | 16    | 0.52   | 24.34  |
| 340   | 19    | 0.62   | 24.96  |
| 341   | 21    | 0.68   | 25.64  |
| 342   | 15    | 0.49   | 26.13  |
| 343   | 19    | 0.62   | 26.75  |
| 344   | 45    | 1.46   | 28.21  |
| 345   | 26    | 0.84   | 29.05  |
| 346   | 11    | 0.36   | 29.41  |
| 347   | 7     | 0.23   | 29.64  |
| 348   | 27    | 0.88   | 30.52  |
| 349   | 19    | 0.62   | 31.13  |
| 350   | 18    | 0.58   | 31.72  |
| 351   | 31    | 1.01   | 32.73  |
| 352   | 32    | 1.04   | 33.77  |
| 353   | 31    | 1.01   | 34.77  |
| 354   | 29    | 0.94   | 35.72  |
| 355   | 29    | 0.94   | 36.66  |
| 356   | 89    | 2.89   | 39.55  |
| 357   | 50    | 1.62   | 41.18  |
| 358   | 31    | 1.01   | 42.18  |
| 359   | 29    | 0.94   | 43.13  |
| 360   | 49    | 1.59   | 44.72  |
| 361   | 51    | 1.66   | 46.38  |
| 362   | 55    | 1.79   | 48.16  |
| 363   | 79    | 2.57   | 50.73  |
| 364   | 65    | 2.11   | 52.84  |
| 365   | 113   | 3.67   | 56.52  |
| 366   | 90    | 2.92   | 59.44  |
| 367   | 139   | 4.52   | 63.96  |
| 368   | 208   | 6.76   | 70.72  |
| 369   | 115   | 3.74   | 74.46  |
| 370   | 87    | 2.83   | 77.28  |
| 371   | 65    | 2.11   | 79.40  |
| 372   | 107   | 3.48   | 82.87  |
| 373   | 81    | 2.63   | 85.51  |
| 374   | 81    | 2.63   | 88.14  |
| 375   | 82    | 2.66   | 90.80  |
| 376   | 67    | 2.18   | 92.98  |
| 377   | 76    | 2.47   | 95.45  |
| 378   | 67    | 2.18   | 97.63  |
| 379   | 40    | 1.30   | 98.93  |
| 380   | 23    | 0.75   | 99.68  |
| 381   | 7     | 0.23   | 99.90  |
| 382   | 2     | 0.06   | 99.97  |
| 383   | 1     | 0.03   | 100.00 |
| <hr/> |       |        |        |
| Total | 3,077 | 100.00 |        |

```
. format previous_spellbegin %tm
```

```
. tabulate previous_spellbegin
```

| previous_spellbegin | Freq. | Percent | Cum. |
|---------------------|-------|---------|------|
| 1945m1              | 1     | 0.03    | 0.03 |
| 1946m10             | 1     | 0.03    | 0.06 |
| 1948m3              | 1     | 0.03    | 0.10 |
| 1952m11             | 1     | 0.03    | 0.13 |
| 1953m8              | 1     | 0.03    | 0.16 |
| 1954m2              | 1     | 0.03    | 0.19 |
| 1954m4              | 1     | 0.03    | 0.23 |
| 1958m8              | 1     | 0.03    | 0.26 |
| 1958m10             | 1     | 0.03    | 0.29 |
| 1959m4              | 1     | 0.03    | 0.32 |
| 1959m6              | 1     | 0.03    | 0.36 |
| 1959m9              | 1     | 0.03    | 0.39 |
| 1960m1              | 4     | 0.13    | 0.52 |
| 1960m5              | 1     | 0.03    | 0.55 |
| 1960m9              | 1     | 0.03    | 0.58 |
| 1961m1              | 1     | 0.03    | 0.62 |
| 1961m3              | 1     | 0.03    | 0.65 |
| 1961m9              | 1     | 0.03    | 0.68 |
| 1963m2              | 1     | 0.03    | 0.71 |
| 1964m2              | 1     | 0.03    | 0.75 |
| 1964m4              | 1     | 0.03    | 0.78 |
| 1964m11             | 2     | 0.06    | 0.84 |
| 1965m3              | 1     | 0.03    | 0.88 |
| 1966m3              | 1     | 0.03    | 0.91 |
| 1966m11             | 1     | 0.03    | 0.94 |
| 1967m4              | 1     | 0.03    | 0.97 |
| 1967m9              | 1     | 0.03    | 1.01 |
| 1967m10             | 1     | 0.03    | 1.04 |
| 1967m11             | 1     | 0.03    | 1.07 |
| 1967m12             | 1     | 0.03    | 1.10 |
| 1968m5              | 1     | 0.03    | 1.14 |
| 1968m8              | 2     | 0.06    | 1.20 |
| 1968m9              | 3     | 0.10    | 1.30 |
| 1969m2              | 1     | 0.03    | 1.33 |
| 1969m7              | 1     | 0.03    | 1.36 |
| 1969m8              | 2     | 0.06    | 1.43 |
| 1969m9              | 1     | 0.03    | 1.46 |
| 1970m3              | 1     | 0.03    | 1.49 |
| 1970m4              | 1     | 0.03    | 1.53 |
| 1970m5              | 1     | 0.03    | 1.56 |
| 1970m6              | 1     | 0.03    | 1.59 |
| 1970m7              | 1     | 0.03    | 1.62 |
| 1970m8              | 1     | 0.03    | 1.66 |
| 1970m9              | 2     | 0.06    | 1.72 |
| 1971m3              | 2     | 0.06    | 1.79 |
| 1971m4              | 2     | 0.06    | 1.85 |
| 1971m5              | 2     | 0.06    | 1.92 |
| 1971m6              | 1     | 0.03    | 1.95 |
| 1971m8              | 2     | 0.06    | 2.01 |
| 1972m1              | 2     | 0.06    | 2.08 |
| 1972m6              | 1     | 0.03    | 2.11 |
| 1972m7              | 2     | 0.06    | 2.18 |
| 1972m8              | 2     | 0.06    | 2.24 |
| 1972m9              | 2     | 0.06    | 2.31 |
| 1972m10             | 1     | 0.03    | 2.34 |
| 1973m2              | 1     | 0.03    | 2.37 |
| 1973m3              | 1     | 0.03    | 2.40 |
| 1973m5              | 1     | 0.03    | 2.44 |
| 1973m6              | 2     | 0.06    | 2.50 |
| 1973m10             | 1     | 0.03    | 2.53 |
| 1973m11             | 1     | 0.03    | 2.57 |
| 1973m12             | 1     | 0.03    | 2.60 |
| 1974m1              | 2     | 0.06    | 2.66 |
| 1974m3              | 1     | 0.03    | 2.70 |
| 1974m4              | 3     | 0.10    | 2.79 |

|         |    |      |      |
|---------|----|------|------|
| 1974m5  | 1  | 0.03 | 2.83 |
| 1974m6  | 2  | 0.06 | 2.89 |
| 1974m7  | 1  | 0.03 | 2.92 |
| 1974m8  | 1  | 0.03 | 2.96 |
| 1974m9  | 1  | 0.03 | 2.99 |
| 1974m11 | 1  | 0.03 | 3.02 |
| 1975m1  | 1  | 0.03 | 3.05 |
| 1975m3  | 1  | 0.03 | 3.09 |
| 1975m4  | 2  | 0.06 | 3.15 |
| 1975m6  | 2  | 0.06 | 3.22 |
| 1975m7  | 1  | 0.03 | 3.25 |
| 1975m9  | 2  | 0.06 | 3.31 |
| 1975m12 | 1  | 0.03 | 3.35 |
| 1976m1  | 1  | 0.03 | 3.38 |
| 1976m4  | 2  | 0.06 | 3.44 |
| 1976m6  | 1  | 0.03 | 3.48 |
| 1976m7  | 1  | 0.03 | 3.51 |
| 1976m8  | 1  | 0.03 | 3.54 |
| 1976m9  | 4  | 0.13 | 3.67 |
| 1976m10 | 1  | 0.03 | 3.70 |
| 1976m11 | 3  | 0.10 | 3.80 |
| 1977m1  | 1  | 0.03 | 3.83 |
| 1977m2  | 2  | 0.06 | 3.90 |
| 1977m3  | 1  | 0.03 | 3.93 |
| 1977m4  | 1  | 0.03 | 3.96 |
| 1977m5  | 2  | 0.06 | 4.03 |
| 1977m6  | 2  | 0.06 | 4.09 |
| 1977m8  | 2  | 0.06 | 4.16 |
| 1977m9  | 5  | 0.16 | 4.32 |
| 1978m1  | 1  | 0.03 | 4.35 |
| 1978m2  | 2  | 0.06 | 4.42 |
| 1978m3  | 4  | 0.13 | 4.55 |
| 1978m4  | 2  | 0.06 | 4.61 |
| 1978m6  | 1  | 0.03 | 4.65 |
| 1978m7  | 2  | 0.06 | 4.71 |
| 1978m8  | 5  | 0.16 | 4.87 |
| 1978m9  | 7  | 0.23 | 5.10 |
| 1978m10 | 2  | 0.06 | 5.17 |
| 1978m11 | 2  | 0.06 | 5.23 |
| 1978m12 | 1  | 0.03 | 5.26 |
| 1979m1  | 3  | 0.10 | 5.36 |
| 1979m2  | 2  | 0.06 | 5.43 |
| 1979m3  | 4  | 0.13 | 5.56 |
| 1979m4  | 2  | 0.06 | 5.62 |
| 1979m5  | 3  | 0.10 | 5.72 |
| 1979m6  | 3  | 0.10 | 5.82 |
| 1979m7  | 2  | 0.06 | 5.88 |
| 1979m8  | 2  | 0.06 | 5.95 |
| 1979m9  | 28 | 0.91 | 6.86 |
| 1979m11 | 1  | 0.03 | 6.89 |
| 1979m12 | 1  | 0.03 | 6.92 |
| 1980m1  | 3  | 0.10 | 7.02 |
| 1980m2  | 2  | 0.06 | 7.08 |
| 1980m3  | 2  | 0.06 | 7.15 |
| 1980m4  | 5  | 0.16 | 7.31 |
| 1980m5  | 3  | 0.10 | 7.41 |
| 1980m6  | 1  | 0.03 | 7.44 |
| 1980m7  | 3  | 0.10 | 7.54 |
| 1980m8  | 2  | 0.06 | 7.60 |
| 1980m9  | 28 | 0.91 | 8.51 |
| 1980m10 | 4  | 0.13 | 8.64 |
| 1980m11 | 3  | 0.10 | 8.74 |
| 1981m1  | 1  | 0.03 | 8.77 |
| 1981m2  | 1  | 0.03 | 8.81 |
| 1981m3  | 1  | 0.03 | 8.84 |
| 1981m4  | 3  | 0.10 | 8.94 |
| 1981m7  | 5  | 0.16 | 9.10 |
| 1981m9  | 2  | 0.06 | 9.16 |
| 1981m10 | 1  | 0.03 | 9.20 |
| 1981m11 | 1  | 0.03 | 9.23 |
| 1982m1  | 2  | 0.06 | 9.29 |
| 1982m2  | 2  | 0.06 | 9.36 |
| 1982m3  | 3  | 0.10 | 9.46 |

|         |    |      |       |
|---------|----|------|-------|
| 1982m4  | 3  | 0.10 | 9.55  |
| 1982m5  | 4  | 0.13 | 9.68  |
| 1982m6  | 2  | 0.06 | 9.75  |
| 1982m8  | 1  | 0.03 | 9.78  |
| 1982m9  | 6  | 0.19 | 9.98  |
| 1982m10 | 3  | 0.10 | 10.07 |
| 1982m12 | 1  | 0.03 | 10.11 |
| 1983m1  | 4  | 0.13 | 10.24 |
| 1983m2  | 3  | 0.10 | 10.33 |
| 1983m3  | 3  | 0.10 | 10.43 |
| 1983m4  | 1  | 0.03 | 10.46 |
| 1983m5  | 4  | 0.13 | 10.59 |
| 1983m6  | 4  | 0.13 | 10.72 |
| 1983m8  | 2  | 0.06 | 10.79 |
| 1983m9  | 7  | 0.23 | 11.02 |
| 1983m10 | 1  | 0.03 | 11.05 |
| 1983m12 | 3  | 0.10 | 11.15 |
| 1984m1  | 2  | 0.06 | 11.21 |
| 1984m2  | 3  | 0.10 | 11.31 |
| 1984m3  | 1  | 0.03 | 11.34 |
| 1984m4  | 1  | 0.03 | 11.37 |
| 1984m5  | 2  | 0.06 | 11.44 |
| 1984m6  | 1  | 0.03 | 11.47 |
| 1984m7  | 4  | 0.13 | 11.60 |
| 1984m8  | 7  | 0.23 | 11.83 |
| 1984m9  | 6  | 0.19 | 12.02 |
| 1984m10 | 4  | 0.13 | 12.15 |
| 1984m11 | 4  | 0.13 | 12.28 |
| 1984m12 | 2  | 0.06 | 12.35 |
| 1985m1  | 3  | 0.10 | 12.45 |
| 1985m2  | 2  | 0.06 | 12.51 |
| 1985m3  | 4  | 0.13 | 12.64 |
| 1985m4  | 5  | 0.16 | 12.80 |
| 1985m5  | 7  | 0.23 | 13.03 |
| 1985m6  | 6  | 0.19 | 13.23 |
| 1985m7  | 7  | 0.23 | 13.45 |
| 1985m8  | 4  | 0.13 | 13.58 |
| 1985m9  | 21 | 0.68 | 14.27 |
| 1985m10 | 8  | 0.26 | 14.53 |
| 1985m11 | 4  | 0.13 | 14.66 |
| 1985m12 | 1  | 0.03 | 14.69 |
| 1986m1  | 9  | 0.29 | 14.98 |
| 1986m2  | 11 | 0.36 | 15.34 |
| 1986m3  | 9  | 0.29 | 15.63 |
| 1986m4  | 11 | 0.36 | 15.99 |
| 1986m5  | 5  | 0.16 | 16.15 |
| 1986m6  | 10 | 0.32 | 16.48 |
| 1986m7  | 3  | 0.10 | 16.57 |
| 1986m8  | 10 | 0.32 | 16.90 |
| 1986m9  | 29 | 0.94 | 17.84 |
| 1986m10 | 4  | 0.13 | 17.97 |
| 1986m11 | 5  | 0.16 | 18.13 |
| 1986m12 | 2  | 0.06 | 18.20 |
| 1987m1  | 14 | 0.45 | 18.65 |
| 1987m2  | 4  | 0.13 | 18.78 |
| 1987m3  | 4  | 0.13 | 18.91 |
| 1987m4  | 9  | 0.29 | 19.21 |
| 1987m5  | 4  | 0.13 | 19.34 |
| 1987m6  | 12 | 0.39 | 19.73 |
| 1987m7  | 10 | 0.32 | 20.05 |
| 1987m8  | 13 | 0.42 | 20.47 |
| 1987m9  | 18 | 0.58 | 21.06 |
| 1987m10 | 17 | 0.55 | 21.61 |
| 1987m11 | 7  | 0.23 | 21.84 |
| 1987m12 | 5  | 0.16 | 22.00 |
| 1988m1  | 25 | 0.81 | 22.81 |
| 1988m2  | 11 | 0.36 | 23.17 |
| 1988m3  | 20 | 0.65 | 23.82 |
| 1988m4  | 16 | 0.52 | 24.34 |
| 1988m5  | 19 | 0.62 | 24.96 |
| 1988m6  | 21 | 0.68 | 25.64 |
| 1988m7  | 15 | 0.49 | 26.13 |
| 1988m8  | 19 | 0.62 | 26.75 |



|         |     |      |        |
|---------|-----|------|--------|
| 1988m9  | 45  | 1.46 | 28.21  |
| 1988m10 | 26  | 0.84 | 29.05  |
| 1988m11 | 11  | 0.36 | 29.41  |
| 1988m12 | 7   | 0.23 | 29.64  |
| 1989m1  | 27  | 0.88 | 30.52  |
| 1989m2  | 19  | 0.62 | 31.13  |
| 1989m3  | 18  | 0.58 | 31.72  |
| 1989m4  | 31  | 1.01 | 32.73  |
| 1989m5  | 32  | 1.04 | 33.77  |
| 1989m6  | 31  | 1.01 | 34.77  |
| 1989m7  | 29  | 0.94 | 35.72  |
| 1989m8  | 29  | 0.94 | 36.66  |
| 1989m9  | 89  | 2.89 | 39.55  |
| 1989m10 | 50  | 1.62 | 41.18  |
| 1989m11 | 31  | 1.01 | 42.18  |
| 1989m12 | 29  | 0.94 | 43.13  |
| 1990m1  | 49  | 1.59 | 44.72  |
| 1990m2  | 51  | 1.66 | 46.38  |
| 1990m3  | 55  | 1.79 | 48.16  |
| 1990m4  | 79  | 2.57 | 50.73  |
| 1990m5  | 65  | 2.11 | 52.84  |
| 1990m6  | 113 | 3.67 | 56.52  |
| 1990m7  | 90  | 2.92 | 59.44  |
| 1990m8  | 139 | 4.52 | 63.96  |
| 1990m9  | 208 | 6.76 | 70.72  |
| 1990m10 | 115 | 3.74 | 74.46  |
| 1990m11 | 87  | 2.83 | 77.28  |
| 1990m12 | 65  | 2.11 | 79.40  |
| 1991m1  | 107 | 3.48 | 82.87  |
| 1991m2  | 81  | 2.63 | 85.51  |
| 1991m3  | 81  | 2.63 | 88.14  |
| 1991m4  | 82  | 2.66 | 90.80  |
| 1991m5  | 67  | 2.18 | 92.98  |
| 1991m6  | 76  | 2.47 | 95.45  |
| 1991m7  | 67  | 2.18 | 97.63  |
| 1991m8  | 40  | 1.30 | 98.93  |
| 1991m9  | 23  | 0.75 | 99.68  |
| 1991m10 | 7   | 0.23 | 99.90  |
| 1991m11 | 2   | 0.06 | 99.97  |
| 1991m12 | 1   | 0.03 | 100.00 |

---

|       |       |        |
|-------|-------|--------|
| Total | 3,077 | 100.00 |
|-------|-------|--------|

```

.
. generate spellend = ym(jhendy4, jhendm)
(24 missing values generated)

. format spellend %tm

.
. recode jspno (. = 0)
(jspno: 0 changes made)

.
. save "$dir\ajobhistory", replace
file C:\My Documents\ajobhistory.dta saved

.
. * OPEN THE INDRESP FILE AND MERGE WITH THE JOB HISTORY FILE
. *-----*

. use ahid pid asex aage ajbstat aqfachi apaygu ajbsemp ajbft ajbbgm ajbbgy4 ///
> using "$datadir/aindresp", clear

. renpfix a

. generate wave = 1

. mvdecode _all, mv(-9/-1)
  jksemp: 4112 missing values generated
  jkbbgm: 5358 missing values generated
  jkbstat: 352 missing values generated
  qkfachi: 371 missing values generated

```

```

        jbft: 4439 missing values generated
        paygu: 5100 missing values generated
        jbbgy4: 5105 missing values generated

. generate current_spellbegin = ym(jbbgy4, jbbgm)
(5358 missing values generated)

. format current_spellbegin %tm

.

. joinby pid using "$dir\ajobhistory.dta", unmatched(both)

.

. tabulate _merge

-----+-----
      _merge |          Freq.      Percent      Cum.
-----+-----
      only in master data |          7,902         70.03       70.03
both in master and using data |          3,382         29.97      100.00
-----+-----
              Total |          11,284        100.00

. drop _merge

.

. save "$dir\ajobhistory.dta", replace
file C:\My Documents\ajobhistory.dta saved

.
. * GENERALISATION TO MULTIPLE WAVES *
. *-----*
.
. * Open the job history files
. * Merge with the indresp files
.
. foreach wave in a b c d e f {
2.      * Job history files
.      use pid `wave'jspno `wave'jhstat `wave'jhbgm `wave'jhbggy4 `wave'jhstpy ///
>      `wave'jhstpy `wave'jhendd `wave'jhendm `wave'jhendy4 `wave'jha9ly ///
>      using "$datadir/\wave'jobhist", clear
3.      renpfix `wave'
4.      generate wave = index("abcdef","`wave'")
5.      mvdecode _all, mv(-9/-1)
6.      replace jhbgm = . if jhbgm > 12
7.      replace jhendm = . if jhendm > 12
8.      save "$dir/\wave'jobhistory_junk", replace
9.      * Individual respondent files
.      use `wave'hid pid `wave'sex `wave'age `wave'jbstat `wave'qfachi ///
>      `wave'paygu `wave'jbsemp `wave'jbft `wave'jbbgm `wave'jbbgy4 ///
>      using "$datadir/\wave'indresp", clear
10.     renpfix `wave'
11.     generate wave = index("abcdef","`wave'")
12.     mvdecode _all, mv(-9/-1)
13.     replace jbbgm = . if jbbgm > 12
14.     * Merge individual respondent file with job history file
.     joinby pid using "$dir/\wave'jobhistory_junk.dta", unmatched(both)
15.     tabulate _merge
16.     drop _merge
17.     * Generate the dates of beginning and end of the spell
.     generate previous_spellbegin = ym(jhbggy4, jhbgm)
18.     format previous_spellbegin %tm
19.     generate spellend = ym(jhendy4, jhendm)
20.     format spellend %tm
21.     generate current_spellbegin = ym(jbbgy4, jbbgm)
22.     format current_spellbegin %tm
23.     recode jspno (. = 0)
24.     compress
25.     save "$dir/\wave'jobhistory.dta", replace
26.     }
jhstat: 62 missing values generated
jhbgm: 303 missing values generated
jha9ly: 1304 missing values generated
jhstpy: 1328 missing values generated

```

```

    jhendd: 880 missing values generated
    jhendm: 24 missing values generated
    jhbgy4: 96 missing values generated
    jhendy4: 20 missing values generated
(0 real changes made)
(0 real changes made)
file C:\My Documents\ajobhistory_junk.dta saved
    jbsemp: 4112 missing values generated
    jbbgm: 5358 missing values generated
    jbstat: 352 missing values generated
    qfachi: 371 missing values generated
    jbft: 4439 missing values generated
    paygu: 5100 missing values generated
    jbbgy4: 5105 missing values generated
(0 real changes made)

```

|                               | _merge | Freq.  | Percent | Cum.   |
|-------------------------------|--------|--------|---------|--------|
| only in master data           |        | 7,902  | 70.03   | 70.03  |
| both in master and using data |        | 3,382  | 29.97   | 100.00 |
| Total                         |        | 11,284 | 100.00  |        |

```

(8207 missing values generated)
(7926 missing values generated)
(5727 missing values generated)
(jspno: 7902 changes made)
    wave was float now byte
    previous_spellbegin was float now int
    spellend was float now int
    current_spellbegin was float now int
(101,556 bytes saved)

```

```

file C:\My Documents\ajobhistory.dta saved
    jhstat: 21 missing values generated
    jhbgm: 169 missing values generated
    jhstpy: 1136 missing values generated
    jhendd: 1060 missing values generated
    jhendm: 4 missing values generated
    jhbgy4: 36 missing values generated
    jhendy4: 5 missing values generated
(32 real changes made, 32 to missing)
(4 real changes made, 4 to missing)
file C:\My Documents\bjobhistory_junk.dta saved
    jbstat: 1 missing value generated
    jbsemp: 4037 missing values generated
    jbbgm: 5218 missing values generated
    qfachi: 439 missing values generated
    jbft: 4234 missing values generated
    paygu: 5002 missing values generated
    jbbgy4: 5013 missing values generated
(27 real changes made, 27 to missing)

```

|                               | _merge | Freq.  | Percent | Cum.   |
|-------------------------------|--------|--------|---------|--------|
| only in master data           |        | 7,785  | 72.74   | 72.74  |
| both in master and using data |        | 2,918  | 27.26   | 100.00 |
| Total                         |        | 10,703 | 100.00  |        |

```

(7988 missing values generated)
(7794 missing values generated)
(5580 missing values generated)
(jspno: 7785 changes made)
    wave was float now byte
    previous_spellbegin was float now int
    spellend was float now int
    current_spellbegin was float now int
(96,327 bytes saved)
file C:\My Documents\bjobhistory.dta saved
    jhbgm: 167 missing values generated
    jhstpy: 1082 missing values generated
    jhendd: 363 missing values generated
    jhendm: 14 missing values generated
    jhbgy4: 33 missing values generated
    jhendy4: 9 missing values generated

```

```

(11 real changes made, 11 to missing)
(1 real change made, 1 to missing)
file C:\My Documents\cjobhistory_junk.dta saved
  jbstat: 8 missing values generated
  jbsemp: 3886 missing values generated
  jbbgm: 5103 missing values generated
  qfachi: 625 missing values generated
  jbft: 4119 missing values generated
  paygu: 4935 missing values generated
  jbbgy4: 4967 missing values generated
(12 real changes made, 12 to missing)

```

|                               | _merge              | Freq.  | Percent | Cum.   |
|-------------------------------|---------------------|--------|---------|--------|
| -----+-----                   |                     |        |         |        |
|                               | only in master data | 7,498  | 71.99   | 71.99  |
| both in master and using data |                     | 2,918  | 28.01   | 100.00 |
| -----+-----                   |                     |        |         |        |
|                               | Total               | 10,416 | 100.00  |        |

```

(7678 missing values generated)
(7515 missing values generated)
(5450 missing values generated)
(jspno: 7498 changes made)
  wave was float now byte
  previous_spellbegin was float now int
  spellend was float now int
  current_spellbegin was float now int
(93,744 bytes saved)
file C:\My Documents\djobhistory.dta saved
  jhstat: 28 missing values generated
  jhbgm: 325 missing values generated
  jhstpy: 1121 missing values generated
  jhendd: 379 missing values generated
  jhendm: 14 missing values generated
  jha9ly: 1 missing value generated
  jhbgy4: 75 missing values generated
  jhendy4: 7 missing values generated

```

```

(1 real change made, 1 to missing)
(1 real change made, 1 to missing)

```

```

file C:\My Documents\djobhistory_junk.dta saved
  jbstat: 6 missing values generated
  jbsemp: 3772 missing values generated
  jbbgm: 5027 missing values generated
  qfachi: 475 missing values generated
  jbft: 3973 missing values generated
  paygu: 4738 missing values generated
  jbbgy4: 4744 missing values generated
(2 real changes made, 2 to missing)

```

|                               | _merge              | Freq.  | Percent | Cum.   |
|-------------------------------|---------------------|--------|---------|--------|
| -----+-----                   |                     |        |         |        |
|                               | only in master data | 7,374  | 71.01   | 71.01  |
| both in master and using data |                     | 3,011  | 28.99   | 100.00 |
| -----+-----                   |                     |        |         |        |
|                               | Total               | 10,385 | 100.00  |        |

```

(7700 missing values generated)
(7389 missing values generated)
(5370 missing values generated)
(jspno: 7374 changes made)
  wave was float now byte
  previous_spellbegin was float now int
  spellend was float now int
  current_spellbegin was float now int
(93,465 bytes saved)
file C:\My Documents\djobhistory.dta saved
  jhstat: 59 missing values generated
  jhbgm: 353 missing values generated
  jhstpy: 1151 missing values generated
  jhendd: 412 missing values generated
  jhendm: 17 missing values generated
  jhbgy4: 103 missing values generated
  jhendy4: 5 missing values generated
(2 real changes made, 2 to missing)
(1 real change made, 1 to missing)

```

```

file C:\My Documents\ejobhistory_junk.dta saved
  jbstat: 2 missing values generated
  jbsemp: 3632 missing values generated
  jbbgm: 4898 missing values generated
  qfachi: 471 missing values generated
  jbft: 3815 missing values generated
  paygu: 4569 missing values generated
  jbbgy4: 4581 missing values generated
(0 real changes made)

```

|                               | _merge | Freq.  | Percent | Cum.   |
|-------------------------------|--------|--------|---------|--------|
| only in master data           |        | 7,087  | 69.49   | 69.49  |
| both in master and using data |        | 3,112  | 30.51   | 100.00 |
| Total                         |        | 10,199 | 100.00  |        |

```

(7444 missing values generated)
(7106 missing values generated)
(5218 missing values generated)
(jspno: 7087 changes made)
  wave was float now byte
  previous_spellbegin was float now int
  spellend was float now int
  current_spellbegin was float now int
(91,791 bytes saved)

```

```

file C:\My Documents\ejobhistory.dta saved
  jhstat: 26 missing values generated
  jhbgm: 318 missing values generated
  jhstpy: 1099 missing values generated
  jhendd: 399 missing values generated
  jhndm: 11 missing values generated
  jhbgy4: 74 missing values generated
  jhendy4: 4 missing values generated
(0 real changes made)

```

```

file C:\My Documents\fjobhistory_junk.dta saved
  jbstat: 16 missing values generated
  jbsemp: 3639 missing values generated
  jbbgm: 4831 missing values generated
  qfachi: 351 missing values generated
  jbft: 3803 missing values generated
  paygu: 4553 missing values generated
  jbbgy4: 4568 missing values generated
(0 real changes made)

```

|                               | _merge | Freq.  | Percent | Cum.   |
|-------------------------------|--------|--------|---------|--------|
| only in master data           |        | 7,343  | 70.86   | 70.86  |
| both in master and using data |        | 3,019  | 29.14   | 100.00 |
| Total                         |        | 10,362 | 100.00  |        |

```

(7662 missing values generated)
(7354 missing values generated)
(5111 missing values generated)
(jspno: 7343 changes made)
  wave was float now byte
  previous_spellbegin was float now int
  spellend was float now int
  current_spellbegin was float now int
(93,258 bytes saved)

```

```

file C:\My Documents\fjobhistory.dta saved

```

```

.
. foreach wave in a b c d e f {
2.     use "$dir/\wave\jobhistory.dta", clear
3.     if indexnot("a","\wave") append using "$dir/jobhistory_final.dta"
4.     * There is no append for the first wave of the data
.     compress
5.     save "$dir/jobhistory_final.dta", replace
6.     }
(0 bytes saved)
file C:\My Documents\jobhistory_final.dta saved
(0 bytes saved)

```

```

file C:\My Documents\jobhistory_final.dta saved
(0 bytes saved)

```

```

.
. *****
. * EXTRACT VARIABLES FROM THE JOB HISTORY FILE *
. * AND RUN A REGRESSION *
. *****
.
. tabulate jhstat

```

| labour force status<br>code | Freq.  | Percent | Cum.   |
|-----------------------------|--------|---------|--------|
| diff job same employer      | 2,893  | 15.93   | 15.93  |
| empl self/diff emply        | 8,758  | 48.22   | 64.14  |
| unemp/job seeking           | 3,067  | 16.89   | 81.03  |
| ret'd from pd emplymt       | 106    | 0.58    | 81.61  |
| on maternity leave          | 315    | 1.73    | 83.35  |
| looking after family        | 1,037  | 5.71    | 89.06  |
| f-t education               | 1,159  | 6.38    | 95.44  |
| lng trm sick/disabl'd       | 179    | 0.99    | 96.42  |
| on govt trng scheme         | 262    | 1.44    | 97.86  |
| something else              | 388    | 2.14    | 100.00 |
| Total                       | 18,164 | 100.00  |        |

```

. tabulate jhstat jbsemp

```

| labour force status<br>code | employee or<br>self-employed:<br>current job | Total  |
|-----------------------------|----------------------------------------------|--------|
| diff job same employer      | 2,852 19                                     | 2,871  |
| empl self/diff emply        | 4,881 585                                    | 5,466  |
| unemp/job seeking           | 2,040 237                                    | 2,277  |
| ret'd from pd emplymt       | 68 12                                        | 80     |
| on maternity leave          | 235 13                                       | 248    |
| looking after family        | 710 69                                       | 779    |
| f-t education               | 726 33                                       | 759    |
| lng trm sick/disabl'd       | 75 12                                        | 87     |
| on govt trng scheme         | 142 10                                       | 152    |
| something else              | 226 36                                       | 262    |
| Total                       | 11,955 1,026                                 | 12,981 |

```

.
. * Keep those who have at most one recoded spell in the job history file
. bysort pid wave: generate TotSpells = _N

```

```

. drop if TotSpells > 1
(9173 observations deleted)

```

```

. tabulate jspno

```

| spell<br>number of<br>labour<br>force<br>status | Freq.  | Percent | Cum.   |
|-------------------------------------------------|--------|---------|--------|
| 0                                               | 44,989 | 83.04   | 83.04  |
| 1                                               | 9,187  | 16.96   | 100.00 |

Total | 54,176 100.00

```
.
. tsset pid wave
    panel variable:  pid (unbalanced)
    time variable:  wave, 1 to 6, but with gaps
    delta: 1 unit

. generate NewJob = 0 if jbstat == 2 & L.jbstat == 2
(36894 missing values generated)

. replace NewJob = 1 if jhstat == 2
(4249 real changes made)

.
. * What is the impact of a job change on wages?
. * Note that you have to generate the dummy variables again
. generate age2 = age^2

. generate Female = 1 if sex == 2
(25242 missing values generated)

. replace Female = 0 if sex == 1
(25242 real changes made)

. label var Female "Dummy for women"

. generate PartTime = 1 if jbft == 2
(47140 missing values generated)

. replace PartTime = 0 if jbft == 1
(23902 real changes made)

. label var PartTime "Part-time dummy"

. tabulate qfachi, gen(Q)
```

|                  | highest academic<br>qualification | Freq.  | Percent | Cum.   |
|------------------|-----------------------------------|--------|---------|--------|
|                  | higher degree                     | 811    | 1.58    | 1.58   |
|                  | 1st degree                        | 3,600  | 7.00    | 8.57   |
| hnd,hnc,teaching |                                   | 2,918  | 5.67    | 14.24  |
|                  | a level                           | 8,199  | 15.93   | 30.17  |
|                  | o level                           | 13,184 | 25.62   | 55.79  |
|                  | cse                               | 2,659  | 5.17    | 60.96  |
|                  | none of these                     | 20,094 | 39.04   | 100.00 |
| Total            |                                   | 51,465 | 100.00  |        |

```
. label var Q1 "higher degree"
. label var Q2 "1st degree"
. label var Q3 "hnd,hnc,teaching"
. label var Q4 "a level"
. label var Q5 "o level"
. label var Q6 "cse"
. label var Q7 "none of these qualif"
. generate year = wave + 1990
. tabulate year, gen(Y)
```

| year | Freq. | Percent | Cum.  |
|------|-------|---------|-------|
| 1991 | 9,581 | 17.68   | 17.68 |
| 1992 | 9,242 | 17.06   | 34.74 |
| 1993 | 9,031 | 16.67   | 51.41 |

|       |        |        |        |
|-------|--------|--------|--------|
| 1994  | 8,856  | 16.35  | 67.76  |
| 1995  | 8,639  | 15.95  | 83.71  |
| 1996  | 8,827  | 16.29  | 100.00 |
| <hr/> |        |        |        |
| Total | 54,176 | 100.00 |        |

```
.
. generate LnW = ln(paygu) if jbsemp == 1
(27597 missing values generated)
```

```
.
. * Declare the data to be panel
. tsset pid year, yearly
    panel variable:  pid (unbalanced)
    time variable:   year, 1991 to 1996, but with gaps
                    delta: 1 year
```

```
.
. xtreg LnW age age2 sex PartTime NewJob Q1-Q6 Y2-Y6, fe vce(robust)
note: sex omitted because of collinearity
```

|                                   |                      |   |       |
|-----------------------------------|----------------------|---|-------|
| Fixed-effects (within) regression | Number of obs        | = | 17377 |
| Group variable: pid               | Number of groups     | = | 5462  |
| R-sq: within = 0.2144             | Obs per group: min = |   | 1     |
| between = 0.4778                  | avg =                |   | 3.2   |
| overall = 0.4720                  | max =                |   | 6     |

|                        |            |   |        |
|------------------------|------------|---|--------|
|                        | F(15,5461) | = | 100.30 |
| corr(u_i, Xb) = 0.4333 | Prob > F   | = | 0.0000 |

(Std. Err. adjusted for 5462 clusters in pid)

| LnW      | Coef.     | Robust Std. Err.                  | t      | P> t  | [95% Conf. Interval] |           |
|----------|-----------|-----------------------------------|--------|-------|----------------------|-----------|
| age      | .0729065  | .0115463                          | 6.31   | 0.000 | .0502711             | .0955419  |
| age2     | -.0009346 | .0000873                          | -10.71 | 0.000 | -.0011057            | -.0007636 |
| sex      | 0         | (omitted)                         |        |       |                      |           |
| PartTime | -.4061249 | .0260675                          | -15.58 | 0.000 | -.4572276            | -.3550221 |
| NewJob   | -.038944  | .0125733                          | -3.10  | 0.002 | -.0635926            | -.0142953 |
| Q1       | .291791   | .107313                           | 2.72   | 0.007 | .0814147             | .5021673  |
| Q2       | .2752159  | .101622                           | 2.71   | 0.007 | .0759962             | .4744355  |
| Q3       | .1142671  | .052778                           | 2.17   | 0.030 | .0108013             | .217733   |
| Q4       | .1480537  | .0438928                          | 3.37   | 0.001 | .0620064             | .2341011  |
| Q5       | .0563789  | .0395975                          | 1.42   | 0.155 | -.021248             | .1340058  |
| Q6       | .0102531  | .0941488                          | 0.11   | 0.913 | -.174316             | .1948223  |
| Y2       | .0781909  | .0251369                          | 3.11   | 0.002 | .0289126             | .1274691  |
| Y3       | .1143867  | .029796                           | 3.84   | 0.000 | .0559746             | .1727988  |
| Y4       | .1700801  | .0364408                          | 4.67   | 0.000 | .0986416             | .2415187  |
| Y5       | .226619   | .0438193                          | 5.17   | 0.000 | .1407158             | .3125223  |
| Y6       | .2865728  | .0516866                          | 5.54   | 0.000 | .1852466             | .3878991  |
| _cons    | 5.32457   | .3606437                          | 14.76  | 0.000 | 4.617565             | 6.031575  |
| <hr/>    |           |                                   |        |       |                      |           |
| sigma_u  | .62081593 |                                   |        |       |                      |           |
| sigma_e  | .22142467 |                                   |        |       |                      |           |
| rho      | .88714497 | (fraction of variance due to u_i) |        |       |                      |           |

```
. test NewJob
```

```
( 1) NewJob = 0
```

|             |   |        |
|-------------|---|--------|
| F( 1, 5461) | = | 9.59   |
| Prob > F    | = | 0.0020 |

```
.
.
.
. * 12.3. Appending Data on Previous Spell to Data on Current Spell
. *****
. * 12.3.1. Merging Files
. *-----
```



```

.
. foreach wave in a b c d e f {
2.     * Job history files
        use pid `wave' jspno `wave' jhstat `wave' jhbgm `wave' jhbggy4 `wave' jhstpy ///
>         `wave' jhstpy `wave' jhendd `wave' jhendm `wave' jhendy4 `wave' jha9ly ///
>         using "$datadir/\`wave'jobhist", clear
3.         renpfix `wave'
4.         generate wave = index("abcdef", "`wave'")
5.         mvdecode _all, mv(-9/-1)
6.         replace jhbgm = . if jhbgm > 12
7.         replace jhendm = . if jhendm > 12
8.         sort pid jspno
9.         save "$dir/\`wave'jobhistory_junk", replace
10.        * Individual respondent files
        use `wave' hid pid `wave' sex `wave' age `wave' jbstat `wave' qfachi ///
>         `wave' paygu `wave' jbsemp `wave' jbft `wave' jbbgm `wave' jbbgy4 ///
>         using "$datadir/\`wave'indresp", clear
11.        renpfix `wave'
12.        generate wave = index("abcdef", "`wave'")
13.        generate jspno = 0
14.        mvdecode _all, mv(-9/-1)
15.        replace jbbgm = . if jbbgm > 12
16.        sort pid jspno
17.        * Merge individual respondent file with job history file
.        merge 1:m pid jspno using "$dir/\`wave'jobhistory_junk.dta"
18.        tabulate _merge
19.        drop _merge
20.        compress
21.        save "$dir/\`wave'jobhistory.dta", replace
22.    }

```

```

jhstat: 62 missing values generated
jhbgm: 303 missing values generated
jha9ly: 1304 missing values generated
jhstpy: 1328 missing values generated
jhendd: 880 missing values generated
jhendm: 24 missing values generated
jhbggy4: 96 missing values generated
jhendy4: 20 missing values generated

```

(0 real changes made)

(0 real changes made)

file C:\My Documents\ajobhistory\_junk.dta saved

```

jbsemp: 4112 missing values generated
jbbgm: 5358 missing values generated
jbstat: 352 missing values generated
qfachi: 371 missing values generated
jbft: 4439 missing values generated
paygu: 5100 missing values generated
jbbgy4: 5105 missing values generated

```

(0 real changes made)

| Result      | # of obs.          |
|-------------|--------------------|
| not matched | 13,646             |
| from master | 10,264 (_merge==1) |
| from using  | 3,382 (_merge==2)  |
| matched     | 0 (_merge==3)      |

| _merge          | Freq.  | Percent | Cum.   |
|-----------------|--------|---------|--------|
| master only (1) | 10,264 | 75.22   | 75.22  |
| using only (2)  | 3,382  | 24.78   | 100.00 |
| Total           | 13,646 | 100.00  |        |

wave was float now byte

jspno was float now byte

(81,876 bytes saved)

file C:\My Documents\ajobhistory.dta saved

```

jhstat: 21 missing values generated
jhbgm: 169 missing values generated
jhstpy: 1136 missing values generated
jhendd: 1060 missing values generated

```

```

    jhndm: 4 missing values generated
    jhbgy4: 36 missing values generated
    jhendy4: 5 missing values generated
(32 real changes made, 32 to missing)
(4 real changes made, 4 to missing)
file C:\My Documents\bjobhistory_junk.dta saved
    jbstat: 1 missing value generated
    jbsemp: 4037 missing values generated
    jbbgm: 5218 missing values generated
    qfachi: 439 missing values generated
    jbft: 4234 missing values generated
    paygu: 5002 missing values generated
    jbbgy4: 5013 missing values generated
(27 real changes made, 27 to missing)

```

| Result      | # of obs.         |
|-------------|-------------------|
| not matched | 12,763            |
| from master | 9,845 (_merge==1) |
| from using  | 2,918 (_merge==2) |
| matched     | 0 (_merge==3)     |

| _merge          | Freq.  | Percent | Cum.   |
|-----------------|--------|---------|--------|
| master only (1) | 9,845  | 77.14   | 77.14  |
| using only (2)  | 2,918  | 22.86   | 100.00 |
| Total           | 12,763 | 100.00  |        |

```

wave was float now byte
jspno was float now byte
(76,578 bytes saved)
file C:\My Documents\bjobhistory.dta saved
    jhbgm: 167 missing values generated
    jhstpy: 1082 missing values generated
    jhendd: 363 missing values generated
    jhndm: 14 missing values generated
    jhbgy4: 33 missing values generated
    jhendy4: 9 missing values generated
(11 real changes made, 11 to missing)
(1 real change made, 1 to missing)
file C:\My Documents\cjobhistory_junk.dta saved
    jbstat: 8 missing values generated
    jbsemp: 3886 missing values generated
    jbbgm: 5103 missing values generated
    qfachi: 625 missing values generated
    jbft: 4119 missing values generated
    paygu: 4935 missing values generated
    jbbgy4: 4967 missing values generated
(12 real changes made, 12 to missing)

```

| Result      | # of obs.         |
|-------------|-------------------|
| not matched | 12,518            |
| from master | 9,600 (_merge==1) |
| from using  | 2,918 (_merge==2) |
| matched     | 0 (_merge==3)     |

| _merge          | Freq.  | Percent | Cum.   |
|-----------------|--------|---------|--------|
| master only (1) | 9,600  | 76.69   | 76.69  |
| using only (2)  | 2,918  | 23.31   | 100.00 |
| Total           | 12,518 | 100.00  |        |

```

wave was float now byte
jspno was float now byte
(75,108 bytes saved)
file C:\My Documents\cjobhistory.dta saved
    jhstat: 28 missing values generated
    jhbgm: 325 missing values generated

```

```

jhstpy: 1121 missing values generated
jhendd: 379 missing values generated
jhendm: 14 missing values generated
jha9ly: 1 missing value generated
jhbgy4: 75 missing values generated
jhendy4: 7 missing values generated
(1 real change made, 1 to missing)
(1 real change made, 1 to missing)
file C:\My Documents\djobhistory_junk.dta saved
jbstat: 6 missing values generated
jbsemp: 3772 missing values generated
jbbgm: 5027 missing values generated
qfachi: 475 missing values generated
jbft: 3973 missing values generated
paygu: 4738 missing values generated
jbbgy4: 4744 missing values generated
(2 real changes made, 2 to missing)

```

| Result      | # of obs. |             |
|-------------|-----------|-------------|
| not matched | 12,492    |             |
| from master | 9,481     | (_merge==1) |
| from using  | 3,011     | (_merge==2) |
| matched     | 0         | (_merge==3) |

| _merge          | Freq.  | Percent | Cum.   |
|-----------------|--------|---------|--------|
| master only (1) | 9,481  | 75.90   | 75.90  |
| using only (2)  | 3,011  | 24.10   | 100.00 |
| Total           | 12,492 | 100.00  |        |

```

wave was float now byte
jspno was float now byte
(74,952 bytes saved)

```

```

file C:\My Documents\djobhistory.dta saved
jhstat: 59 missing values generated
jhbmg: 353 missing values generated
jhstpy: 1151 missing values generated
jhendd: 412 missing values generated
jhendm: 17 missing values generated
jhbgy4: 103 missing values generated
jhendy4: 5 missing values generated
(2 real changes made, 2 to missing)
(1 real change made, 1 to missing)
file C:\My Documents\ejobhistory_junk.dta saved
jbstat: 2 missing values generated
jbsemp: 3632 missing values generated
jbbgm: 4898 missing values generated
qfachi: 471 missing values generated
jbft: 3815 missing values generated
paygu: 4569 missing values generated
jbbgy4: 4581 missing values generated
(0 real changes made)

```

| Result      | # of obs. |             |
|-------------|-----------|-------------|
| not matched | 12,361    |             |
| from master | 9,249     | (_merge==1) |
| from using  | 3,112     | (_merge==2) |
| matched     | 0         | (_merge==3) |

| _merge          | Freq.  | Percent | Cum.   |
|-----------------|--------|---------|--------|
| master only (1) | 9,249  | 74.82   | 74.82  |
| using only (2)  | 3,112  | 25.18   | 100.00 |
| Total           | 12,361 | 100.00  |        |

```

wave was float now byte
jspno was float now byte

```



```

(18360 real changes made)
(18277 real changes made)

.
. generate Status = 1 if jbstat == 1 | jbstat == 2 | jhstat == 1 | jhstat == 2
(31809 missing values generated)

. replace Status = 2 if jbstat == 3 | jhstat == 3
(6030 real changes made)

. replace Status = 3 if (jbstat >= 4 & jbstat <= 10) | ///
>         (jhstat >= 4 & jhstat <= 10)
(25198 real changes made)

. label var Status "Employment Status"

. label define ES 1 "Employed" 2 "Unemployed" 3 "Inactive"

. label value Status ES

.
.
. * 12.3.3. Addressing Inconsistencies
. *-----
.
. generate JBSpellStart = ym(jbbgy4, jbbgm)
(48839 missing values generated)

. generate JHSpellStart = ym(jhbgy4, jhbgm)
(59567 missing values generated)

. generate JHSpellEnd = ym(jhendy4, jhendm)
(57972 missing values generated)

.
. bysort pid wave (jspno): generate Cronjspno = _N - jspno

.
. generate SpellBegin = JBSpellStart if jspno == 0
(48839 missing values generated)

. replace SpellBegin = JHSpellStart if jspno > 0 & jspno ~= .
(16670 real changes made)

.
. generate SpellEnd = JHSpellEnd
(57972 missing values generated)

.
. * If there has been no change and dates do not match
. bysort pid (wave Cronjspno): replace SpellBegin = SpellBegin[_n-1] if ///
>         SpellBegin ~= SpellBegin[_n-1] & SpellBegin[_n-1] ~= . & ///
>         jspno == 0 & Cronjspno == 1 & wave > 1
(9965 real changes made)

. * If there have been intervening spells but the dates do not match
. * the windresp file overrides the w+1 job history file
. * JHSpellStart of the oldest spell in the job history file must be >=
. * JBSpellStart in the indresp file
. bysort pid (wave Cronjspno): replace SpellBegin = JBSpellStart[_n-1] if ///
>         SpellBegin < JBSpellStart[_n-1] & SpellBegin ~= . & ///
>         JBSpellStart[_n-1] ~= . & Status == Status[_n-1] & wave > 1
(3960 real changes made)

. bysort pid (wave Cronjspno): replace SpellBegin = JHSpellStart if ///
>         SpellBegin == . & JHSpellStart ~= . & ///
>         jspno ~= 0 & Cronjspno == 1 & wave > 1
(0 real changes made)

. bysort pid (wave Cronjspno): replace SpellBegin = SpellBegin[_n-1] if ///
>         SpellBegin == . & SpellBegin[_n-1] ~= . & ///
>         JHSpellStart == . & Status == Status[_n-1] & ///
>         jspno ~= 0 & Cronjspno == 1 & wave > 1

```

(528 real changes made)

```
.      * This would be the oldest spell in case of multiple spells
.
. foreach var of varlist JBSpellStart JHSpellStart JHSpellEnd ///
>      SpellBegin SpellEnd {
2.      format `var' %tm
3.      }

.
.
. save "$dir\jobhistory_final.dta", replace
file C:\My Documents\\jobhistory_final.dta saved

.
. log close
      name: <unnamed>
      log:  C:\My Documents\\Example_Chapter12.log
      log type: text
closed on:  30 Jul 2014, 08:34:42
```

---

---
