# Supplementary material
Source: publisher site journal article supplement (https://uk.sagepub.com/sites/default/files/upm-binaries/74511_AppendixC_LogFiles.zip)
Supplement: Supplementary file 8 [file 74511_AppendixC_LogFiles.zip]

```
*****
* A Practical Guide to Using Panel Data
* Simonetta Longhi and Alita Nandi
* ISER, University of Essex
* Chapter 5
*****
```

```
-----
name: <unnamed>
log: C:\My Documents\\Example_Chapter5.log
log type: text
opened on: 30 Jul 2014, 09:49:29
```

```
.
.
. * Section 5.3.1
```

```
. use pid rhid rage rhgsex rhgemp rhoh rxewght using "$datadir/rindall", clear
```

```
. describe rhgemp
```

| variable name | storage type | display format | value label | variable label              |
|---------------|--------------|----------------|-------------|-----------------------------|
| rhgemp        | byte         | %8.0g          | rhgemp      | employment status - hh grid |

```
. label list rhgemp
```

```
rhgemp:
-9 missing or wild
-8 inapplicable
-2 refused
-1 don't know
0 under 16 years
1 yes
2 no
```

```
. generate NotEmp = (rhgemp ~= 1) if rhgemp>=0
(106 missing values generated)
```

```
. tab2 NotEmp rhgemp, missing
```

```
-> tabulation of NotEmp by rhgemp
```

| NotEmp | employment status - hh grid |          |       |       | Total  |
|--------|-----------------------------|----------|-------|-------|--------|
|        | don't kno                   | under 16 | yes   | no    |        |
| 0      | 0                           | 0        | 9,668 | 0     | 9,668  |
| 1      | 0                           | 4,113    | 0     | 6,290 | 10,403 |
| .      | 106                         | 0        | 0     | 0     | 106    |
| Total  | 106                         | 4,113    | 9,668 | 6,290 | 20,177 |

```
. bysort rhid: egen numNotEmp = sum(NotEmp)
```

```
. bysort rhid: egen empmiss = sum(NotEmp==.)
```

```
. replace numNotEmp=. if empmiss>0
(237 real changes made, 237 to missing)
```

```
. bysort rhid: egen numNotEmp2 = sum(rhgemp ~= 1 & rhgemp>=0)
```

```
. bysort rhid: egen empmiss2 = sum(rhgemp<0)
```

```
. replace numNotEmp2=. if empmiss2>0
(237 real changes made, 237 to missing)
```

```
. summarize pid if numNotEmp~=numNotEmp2
```

| Variable | Obs | Mean | Std. Dev. | Min | Max |
|----------|-----|------|-----------|-----|-----|
| pid      | 0   |      |           |     |     |

```
. tabulate numNotEmp numNotEmp2, missing
```

| numNotEmp | numNotEmp2 |       |       |       |       |     | Total  |
|-----------|------------|-------|-------|-------|-------|-----|--------|
|           | 0          | 1     | 2     | 3     | 4     | 5   |        |
| 0         | 4,198      | 0     | 0     | 0     | 0     | 0   | 4,198  |
| 1         | 0          | 5,399 | 0     | 0     | 0     | 0   | 5,399  |
| 2         | 0          | 0     | 5,995 | 0     | 0     | 0   | 5,995  |
| 3         | 0          | 0     | 0     | 2,496 | 0     | 0   | 2,496  |
| 4         | 0          | 0     | 0     | 0     | 1,060 | 0   | 1,060  |
| 5         | 0          | 0     | 0     | 0     | 0     | 471 | 471    |
| 6         | 0          | 0     | 0     | 0     | 0     | 0   | 177    |
| 7         | 0          | 0     | 0     | 0     | 0     | 0   | 76     |
| 8         | 0          | 0     | 0     | 0     | 0     | 0   | 17     |
| 9         | 0          | 0     | 0     | 0     | 0     | 0   | 21     |
| 10        | 0          | 0     | 0     | 0     | 0     | 0   | 14     |
| 12        | 0          | 0     | 0     | 0     | 0     | 0   | 16     |
| .         | 0          | 0     | 0     | 0     | 0     | 0   | 237    |
| Total     | 4,198      | 5,399 | 5,995 | 2,496 | 1,060 | 471 | 20,177 |

| numNotEmp | numNotEmp2 |    |    |    |    |    | Total  |
|-----------|------------|----|----|----|----|----|--------|
|           | 6          | 7  | 8  | 9  | 10 | 12 |        |
| 0         | 0          | 0  | 0  | 0  | 0  | 0  | 4,198  |
| 1         | 0          | 0  | 0  | 0  | 0  | 0  | 5,399  |
| 2         | 0          | 0  | 0  | 0  | 0  | 0  | 5,995  |
| 3         | 0          | 0  | 0  | 0  | 0  | 0  | 2,496  |
| 4         | 0          | 0  | 0  | 0  | 0  | 0  | 1,060  |
| 5         | 0          | 0  | 0  | 0  | 0  | 0  | 471    |
| 6         | 177        | 0  | 0  | 0  | 0  | 0  | 177    |
| 7         | 0          | 76 | 0  | 0  | 0  | 0  | 76     |
| 8         | 0          | 0  | 17 | 0  | 0  | 0  | 17     |
| 9         | 0          | 0  | 0  | 21 | 0  | 0  | 21     |
| 10        | 0          | 0  | 0  | 0  | 14 | 0  | 14     |
| 12        | 0          | 0  | 0  | 0  | 0  | 16 | 16     |
| .         | 0          | 0  | 0  | 0  | 0  | 0  | 237    |
| Total     | 177        | 76 | 17 | 21 | 14 | 16 | 20,177 |

| numNotEmp | numNotEmp2 | Total  |
|-----------|------------|--------|
|           | .          |        |
| 0         | 0          | 4,198  |
| 1         | 0          | 5,399  |
| 2         | 0          | 5,995  |
| 3         | 0          | 2,496  |
| 4         | 0          | 1,060  |
| 5         | 0          | 471    |
| 6         | 0          | 177    |
| 7         | 0          | 76     |
| 8         | 0          | 17     |
| 9         | 0          | 21     |
| 10        | 0          | 14     |
| 12        | 0          | 16     |
| .         | 237        | 237    |
| Total     | 237        | 20,177 |

```
. tabulate empmiss empmiss2, missing
```

| empmiss | empmiss2 |   |   |   | Total |
|---------|----------|---|---|---|-------|
|         | 0        | 1 | 2 | 3 | 4     |

|       |        |     |    |    |    |        |
|-------|--------|-----|----|----|----|--------|
| 0     | 19,940 | 0   | 0  | 0  | 0  | 19,940 |
| 1     | 0      | 141 | 0  | 0  | 0  | 141    |
| 2     | 0      | 0   | 33 | 0  | 0  | 33     |
| 3     | 0      | 0   | 0  | 45 | 0  | 45     |
| 4     | 0      | 0   | 0  | 0  | 18 | 18     |
| Total | 19,940 | 141 | 33 | 45 | 18 | 20,177 |

```

.
. label list rhoh rhgsex
rhoh:
    -9 missing or wild
    -8 inapplicable
    1 head of household
    2 not head
rhgsex:
    -9 missing or wild
    -8 inapplicable
    1 male
    2 female

. bysort rhid: egen femaleHoH = sum(rhoh == 1 & rhgsex == 2)

.
. bysort rhid: egen numkids = sum(rage >= 0 & rage < 16)

.
. save tempIND, replace
(note: file tempIND.dta not found)
file tempIND.dta saved

.
.
. * Section 5.3.2
. *-----
.
. use rhid rfihhmn rfieqfcb rhhsz rregion2 using "$datadir/rhhresp", clear

.
. bysort rhid: gen uniqueHH = _N

. tabulate uniqueHH

    uniqueHH |      Freq.      Percent      Cum.
-----+-----
          1 |      8,144       100.00       100.00
-----+-----
        Total |      8,144       100.00

.
. duplicates report rhid

Duplicates in terms of rhid

-----
    copies | observations      surplus
-----+-----
          1 |          8144              0
-----

. isid rhid

.
.
. sort rhid

. save tempHH, replace
(note: file tempHH.dta not found)
file tempHH.dta saved

.

```

```
. use tempIND, clear
```

```
. sort rhid
```

```
. duplicates report rhid
```

Duplicates in terms of rhid

| -----  |              |         |
|--------|--------------|---------|
| copies | observations | surplus |
| -----  |              |         |
| 1      | 2103         | 0       |
| 2      | 5622         | 2811    |
| 3      | 4107         | 2738    |
| 4      | 4888         | 3666    |
| 5      | 2315         | 1852    |
| 6      | 786          | 655     |
| 7      | 196          | 168     |
| 8      | 72           | 63      |
| 9      | 27           | 24      |
| 10     | 20           | 18      |
| 11     | 11           | 10      |
| 14     | 14           | 13      |
| 16     | 16           | 15      |
| -----  |              |         |

```
. duplicates report pid
```

Duplicates in terms of pid

| -----  |              |         |
|--------|--------------|---------|
| copies | observations | surplus |
| -----  |              |         |
| 1      | 20177        | 0       |
| -----  |              |         |

```
.
. merge m:1 rhid using tempHH
```

| Result      | # of obs.          |
|-------------|--------------------|
| -----       |                    |
| not matched | 0                  |
| matched     | 20,177 (_merge==3) |

```
. drop _merge
```

```
.
.
. * Ssection 5.3.3
. *-----
.
. generate equivHHinc = rfihhmn/rfieqfcb if rfihhmn>=0 & rfihhmn<.
(1308 missing values generated)
```

```
. summarize equivHHinc [aweight = rxewght], detail
```

| equivHHinc |             |          |             |            |
|------------|-------------|----------|-------------|------------|
| -----      |             |          |             |            |
|            | Percentiles | Smallest |             |            |
| 1%         | 323.3831    | 0        |             |            |
| 5%         | 820.5641    | 0        |             |            |
| 10%        | 1036.76     | 0        | Obs         | 10065      |
| 25%        | 1459.49     | 0        | Sum of Wgt. | 11023.2248 |
| 50%        | 2276.995    |          | Mean        | 2703.679   |
|            |             | Largest  | Std. Dev.   | 2038.301   |
| 75%        | 3355.301    | 34906.02 |             |            |
| 90%        | 4787.225    | 34906.02 | Variance    | 4154669    |
| 95%        | 5946.25     | 34906.02 | Skewness    | 4.980602   |
| 99%        | 9390.515    | 42690.16 | Kurtosis    | 61.3869    |

```
. return list
```

```
scalars:
```

```

      r(N) = 10065
      r(sum_w) = 11023.22475796938
      r(mean) = 2703.679091031838
      r(Var) = 4154668.930140617
      r(sd) = 2038.300500451446
      r(skewness) = 4.980602030204397
      r(kurtosis) = 61.38689852694022
      r(sum) = 29803262.29386631
      r(min) = 0
      r(max) = 42690.1640625
      r(p1) = 323.3830871582031
      r(p5) = 820.5641479492188
      r(p10) = 1036.760131835938
      r(p25) = 1459.489990234375
      r(p50) = 2276.994873046875
      r(p75) = 3355.30126953125
      r(p90) = 4787.22509765625
      r(p95) = 5946.25048828125
      r(p99) = 9390.5146484375

```

```
. generate PovertyLine = 0.60*r(p50)
```

```
.
. generate poor = (equivHHinc<PovertyLine) if equivHHinc<.
(1308 missing values generated)
```

```
.
. tabulate poor
```

| poor  | Freq.  | Percent | Cum.   |
|-------|--------|---------|--------|
| 0     | 14,607 | 77.41   | 77.41  |
| 1     | 4,262  | 22.59   | 100.00 |
| Total | 18,869 | 100.00  |        |

```
.
. summarize equivHHinc [aweight = rxewght], detail
```

| equivHHinc  |          |          |             |            |
|-------------|----------|----------|-------------|------------|
| Percentiles |          | Smallest |             |            |
| 1%          | 323.3831 | 0        |             |            |
| 5%          | 820.5641 | 0        |             |            |
| 10%         | 1036.76  | 0        | Obs         | 10065      |
| 25%         | 1459.49  | 0        | Sum of Wgt. | 11023.2248 |
| 50%         | 2276.995 |          | Mean        | 2703.679   |
|             |          | Largest  | Std. Dev.   | 2038.301   |
| 75%         | 3355.301 | 34906.02 |             |            |
| 90%         | 4787.225 | 34906.02 | Variance    | 4154669    |
| 95%         | 5946.25  | 34906.02 | Skewness    | 4.980602   |
| 99%         | 9390.515 | 42690.16 | Kurtosis    | 61.3869    |

```
. global PovertyLine = 0.60*r(p50)
```

```
. generate poor2 = (equivHHinc<$PovertyLine) if equivHHinc<.
(1308 missing values generated)
```

```
.
. tabulate poor poor2, missing
```

| poor  | poor2  |       | .     | Total  |
|-------|--------|-------|-------|--------|
|       | 0      | 1     |       |        |
| 0     | 14,607 | 0     | 0     | 14,607 |
| 1     | 0      | 4,262 | 0     | 4,262  |
| .     | 0      | 0     | 1,308 | 1,308  |
| Total | 14,607 | 4,262 | 1,308 | 20,177 |

```

.
. save PovertyWave_r, replace
(note: file PovertyWave_r.dta not found)
file PovertyWave_r.dta saved

.
.
. * Section 5.3.5
. *-----
.
. import excel using "HHtenure2011UKcensus.xls", clear cellrange(A11:E20)

.
. rename B HH_all

. rename D HH_social_rented

. rename E pr_social_rented

.
. generate rregion2=1 if A=="North East"
(9 missing values generated)

. replace rregion2=2 if A=="North West"
(1 real change made)

. replace rregion2=3 if A=="Yorkshire and The Humber"
(1 real change made)

. replace rregion2=4 if A=="East Midlands"
(1 real change made)

. replace rregion2=5 if A=="West Midlands"
(1 real change made)

. replace rregion2=6 if A=="East"
(1 real change made)

. replace rregion2=7 if A=="London"
(1 real change made)

. replace rregion2=8 if A=="South East"
(1 real change made)

. replace rregion2=9 if A=="South West"
(1 real change made)

. replace rregion2=10 if A=="Wales"
(1 real change made)

. label define rregion2 1 "North East" 2 "North West" ///
>                                     3 "Yorkshire and The Humber" ///
>                                     4 "East Midlands" 5 "West Midlands" 6 "East" 7 "London" ///
>                                     8 "South East" 9 "South West" 10 "Wales"

. label value rregion2 rregion2

.
. fre rregion2

```

rregion2

|       |   |                          | Freq. | Percent | Valid | Cum.  |
|-------|---|--------------------------|-------|---------|-------|-------|
| Valid | 1 | North East               | 1     | 10.00   | 10.00 | 10.00 |
|       | 2 | North West               | 1     | 10.00   | 10.00 | 20.00 |
|       | 3 | Yorkshire and The Humber | 1     | 10.00   | 10.00 | 30.00 |
|       | 4 | East Midlands            | 1     | 10.00   | 10.00 | 40.00 |
|       | 5 | West Midlands            | 1     | 10.00   | 10.00 | 50.00 |
|       | 6 | East                     | 1     | 10.00   | 10.00 | 60.00 |
|       | 7 | London                   | 1     | 10.00   | 10.00 | 70.00 |

|       |            |    |        |        |        |
|-------|------------|----|--------|--------|--------|
| 8     | South East | 1  | 10.00  | 10.00  | 80.00  |
| 9     | South West | 1  | 10.00  | 10.00  | 90.00  |
| 10    | Wales      | 1  | 10.00  | 10.00  | 100.00 |
| Total |            | 10 | 100.00 | 100.00 |        |

```

.
. drop A C

. sort rregion2

. save temp, replace
(note: file temp.dta not found)
file temp.dta saved

.

. use PovertyWave_r, clear

. sort rregion2

. merge m:1 rregion2 using temp
(note: variable rregion2 was byte, now float to accommodate using data's values)
(label rregion2 already defined)

```

| Result      | # of obs. |                      |
|-------------|-----------|----------------------|
| not matched | 6,844     |                      |
| from master | 6,844     | ( <u>_merge</u> ==1) |
| from using  | 0         | ( <u>_merge</u> ==2) |
| matched     | 13,333    | ( <u>_merge</u> ==3) |

```

.
. fre rregion2 if _merge==1

```

rregion2 -- government office region

|       |                     | Freq. | Percent | Valid  | Cum.   |
|-------|---------------------|-------|---------|--------|--------|
| Valid | -9 missing or wild  | 136   | 1.99    | 1.99   | 1.99   |
|       | 11 scotland         | 3509  | 51.27   | 51.27  | 53.26  |
|       | 12 northern ireland | 3199  | 46.74   | 46.74  | 100.00 |
|       | Total               | 6844  | 100.00  | 100.00 |        |

```

.
. keep if _merge==3
(6844 observations deleted)

```

```

. drop _merge

```

```

.
. save PovertyWave_r, replace
file PovertyWave_r.dta saved

```

```

.
.
. * Section 5.4
. *-----
.
. use PovertyWave_r, clear

```

```

.
. foreach var in rhgsex numkids numNotEmp femaleHoH rhhsiz {
2.     tabulate `var' poor, row nofreq chi2
3. }

```

| sex - hh grid | poor<br>0 | 1     | Total  |
|---------------|-----------|-------|--------|
| male          | 79.87     | 20.13 | 100.00 |
| female        | 77.35     | 22.65 | 100.00 |

|       |       |       |        |
|-------|-------|-------|--------|
| Total | 78.58 | 21.42 | 100.00 |
|-------|-------|-------|--------|

Pearson chi2(1) = 11.6071 Pr = 0.001

| numkids | poor<br>0 | 1      | Total  |
|---------|-----------|--------|--------|
| 0       | 80.36     | 19.64  | 100.00 |
| 1       | 82.86     | 17.14  | 100.00 |
| 2       | 78.31     | 21.69  | 100.00 |
| 3       | 63.39     | 36.61  | 100.00 |
| 4       | 41.95     | 58.05  | 100.00 |
| 5       | 48.86     | 51.14  | 100.00 |
| 6       | 100.00    | 0.00   | 100.00 |
| 7       | 0.00      | 100.00 | 100.00 |
| Total   | 78.58     | 21.42  | 100.00 |

Pearson chi2(7) = 365.1868 Pr = 0.000

| numNotEmp | poor<br>0 | 1      | Total  |
|-----------|-----------|--------|--------|
| 0         | 95.95     | 4.05   | 100.00 |
| 1         | 81.81     | 18.19  | 100.00 |
| 2         | 77.55     | 22.45  | 100.00 |
| 3         | 67.03     | 32.97  | 100.00 |
| 4         | 57.58     | 42.42  | 100.00 |
| 5         | 21.90     | 78.10  | 100.00 |
| 6         | 24.05     | 75.95  | 100.00 |
| 7         | 40.00     | 60.00  | 100.00 |
| 8         | 0.00      | 100.00 | 100.00 |
| 10        | 100.00    | 0.00   | 100.00 |
| 12        | 100.00    | 0.00   | 100.00 |
| Total     | 78.78     | 21.22  | 100.00 |

Pearson chi2(10) = 1.5e+03 Pr = 0.000

| femaleHoH | poor<br>0 | 1     | Total  |
|-----------|-----------|-------|--------|
| 0         | 82.57     | 17.43 | 100.00 |
| 1         | 66.94     | 33.06 | 100.00 |
| Total     | 78.58     | 21.42 | 100.00 |

Pearson chi2(1) = 340.0191 Pr = 0.000

| number of<br>persons in<br>household | poor<br>0 | 1      | Total  |
|--------------------------------------|-----------|--------|--------|
| 1                                    | 68.76     | 31.24  | 100.00 |
| 2                                    | 80.07     | 19.93  | 100.00 |
| 3                                    | 84.10     | 15.90  | 100.00 |
| 4                                    | 82.79     | 17.21  | 100.00 |
| 5                                    | 71.38     | 28.62  | 100.00 |
| 6                                    | 62.90     | 37.10  | 100.00 |
| 7                                    | 53.85     | 46.15  | 100.00 |
| 8                                    | 50.00     | 50.00  | 100.00 |
| 9                                    | 0.00      | 100.00 | 100.00 |
| 10                                   | 0.00      | 100.00 | 100.00 |
| 14                                   | 100.00    | 0.00   | 100.00 |
| 16                                   | 100.00    | 0.00   | 100.00 |
| Total                                | 78.58     | 21.42  | 100.00 |

Pearson chi2(11) = 407.3110 Pr = 0.000

```
. tabstat poor, by(rregion2) format(%9.2f)
```



Summary for variables: poor  
by categories of: rregion2 (government office region)

| rregion2         | mean |
|------------------|------|
| north east       | 0.20 |
| north west       | 0.24 |
| yorkshire and th | 0.21 |
| east midlands    | 0.29 |
| west midlands    | 0.22 |
| east of england  | 0.21 |
| london           | 0.15 |
| south east       | 0.15 |
| south west       | 0.19 |
| wales            | 0.24 |
| Total            | 0.21 |

```
.
. tabstat pr_social_rented, by(poor) format(%9.2f)
```

Summary for variables: pr\_social\_rented  
by categories of: poor

| poor  | mean  |
|-------|-------|
| 0     | 17.00 |
| 1     | 16.99 |
| Total | 17.00 |

```
.
.
. * Section 5.6
. *-----
.
. use PovertyWave_r, clear

. bysort rhid: keep if _n == 1
(7954 observations deleted)

. duplicates report rhid
```

Duplicates in terms of rhid

| copies | observations | surplus |
|--------|--------------|---------|
| 1      | 5379         | 0       |

```
.
. use PovertyWave_r, clear

. bysort rhid: keep if _n == _N
(7954 observations deleted)

. duplicates report rhid
```

Duplicates in terms of rhid

| copies | observations | surplus |
|--------|--------------|---------|
| 1      | 5379         | 0       |

```
.
. use PovertyWave_r, clear
```

```
. bysort rhid (rage): keep if _n == _N
(7954 observations deleted)
```

```
. duplicates report rhid
```

Duplicates in terms of rhid

```
-----
      copies | observations      surplus
-----+-----
           1 |          5379           0
-----
```

```
.
.
. * Section 5.7.1
. *-----
.
. foreach w in q r {
2.      use `w'hid `w'fihhmn `w'fieqfcb using "$datadir/`w'hhresp", clear
3.      generate equivHHinc = `w'fihhmn/`w'fieqfcb if `w'fihhmn>=0
4.      sort `w'hid
5.      save temp, replace
6.
.      use pid `w'hid `w'xewght using "$datadir/`w'indall", clear
7.      sort `w'hid
8.      merge m:1 `w'hid using temp
9.      drop _merge
10.     summarize equivHHinc [aweight = `w'xewght], detail
11.     global PovertyLine = 0.60*r(p50)
12.     generate `w'poor = (equivHHinc<$PovertyLine) if equivHHinc<.
13.     keep `w'poor pid
14.     sort pid
15.     save PoorWave_`w', replace
16. }
(487 missing values generated)
file temp.dta saved
```

```
Result                                     # of obs.
-----
not matched                                0
matched                                  20,715  (_merge==3)
-----
```

```

equivHHinc
-----
Percentiles      Smallest
1%      262.6667      0
5%      790.5507      0
10%     985.6281      0      Obs      10350
25%     1424.412      0      Sum of Wgt. 10333.1036

50%     2176.722
75%     3262.754      Largest      Mean      2579.894
90%     4586.558      20402.16      Std. Dev. 1794.254
95%     5632.917      23907.1      Variance 3219347
99%     8988.595      26974.85      Skewness 3.156949
Kurtosis 25.85613
(1175 missing values generated)
(note: file PoorWave_q.dta not found)
file PoorWave_q.dta saved
(546 missing values generated)
file temp.dta saved
```

```
Result                                     # of obs.
-----
not matched                                0
matched                                  20,177  (_merge==3)
-----
```

```

equivHHinc
-----
Percentiles      Smallest
```

```

1%      323.3831      0
5%      820.5641      0
10%     1036.76      0      Obs      10065
25%     1459.49      0      Sum of Wgt. 11023.2248

50%     2276.995      Mean      2703.679
                        Largest Std. Dev. 2038.301
75%     3355.301      34906.02
90%     4787.225      34906.02      Variance      4154669
95%     5946.25      34906.02      Skewness      4.980602
99%     9390.515      42690.16      Kurtosis      61.3869
(1308 missing values generated)
(note: file PoorWave_r.dta not found)
file PoorWave_r.dta saved

```

```

.
. use PoorWave_r, clear
. merge 1:1 pid using PoorWave_q

```

| Result      | # of obs. |             |
|-------------|-----------|-------------|
| not matched | 2,416     |             |
| from master | 939       | (_merge==1) |
| from using  | 1,477     | (_merge==2) |
| matched     | 19,238    | (_merge==3) |

```

. keep if _merge==3
(2416 observations deleted)

```

```

. drop _merge

```

```

.
.
. * Section 5.7.2
. *-----
.
. egen poorch=concat(qpoor rpoor) if qpoor<. & rpoor<.
(1302 missing values generated)

```

```

. tabulate poorch

```

| poorch | Freq.  | Percent | Cum.   |
|--------|--------|---------|--------|
| 00     | 12,828 | 71.52   | 71.52  |
| 01     | 1,521  | 8.48    | 80.00  |
| 10     | 1,119  | 6.24    | 86.24  |
| 11     | 2,468  | 13.76   | 100.00 |
| Total  | 17,936 | 100.00  |        |

```

.
.
. * erase all temporary files
. *-----
.
. erase tempIND.dta
. erase tempHH.dta
. erase temp.dta
. erase PoorWave_q.dta
. erase PoorWave_r.dta
. erase PovertyWave_r.dta
. log close
name: <unnamed>
log: C:\My Documents\\Example_Chapter5.log

```

log type: text  
closed on: 30 Jul 2014, 09:49:33

---
