# Supplementary material
Source: publisher site journal article supplement (https://uk.sagepub.com/sites/default/files/upm-binaries/74511_AppendixC_LogFiles.zip)
Supplement: Supplementary file 9 [file 74511_AppendixC_LogFiles.zip]

```
*****
* A Practical Guide to Using Panel Data
* Simonetta Longhi and Alita Nandi
* ISER, University of Essex
* Chapter 9
*****
```

```
-----
name: <unnamed>
log: C:\My Documents\Example_Chapter9.log
log type: text
opened on: 29 Jul 2014, 17:44:08
```

```
.
. * 9.1. Introduction
. *-----
```

```
.
. use "$dir/DataFile", clear
```

```
.
. * 9.2.1. Pooled Estimations
.
```

```
. generate LnW = ln(paygu)
(118881 missing values generated)
```

```
. generate age2 = age^2
(9 missing values generated)
```

```
. recode sex (1 = 0) (2 = 1), gen(Female)
(236902 differences between sex and Female)
```

```
.
. label list rmastat
rmastat:
```

```
-9 missing or wild
-8 inapplicable
-2 refused
-1 not answered
0 child under 16
1 married
2 living as couple
3 widowed
4 divorced
5 separated
6 never married
7 civil partnership
8 dissolved civil part
9 sep from civil part
10 survive from civ par
```

```
. tabulate mastat
```

| marital status       | Freq.   | Percent | Cum.   |
|----------------------|---------|---------|--------|
| child under 16       | 523     | 0.22    | 0.22   |
| married              | 127,836 | 53.50   | 53.72  |
| living as couple     | 25,213  | 10.55   | 64.27  |
| widowed              | 18,304  | 7.66    | 71.93  |
| divorced             | 12,636  | 5.29    | 77.22  |
| separated            | 4,042   | 1.69    | 78.91  |
| never married        | 50,332  | 21.06   | 99.98  |
| civil partnership    | 47      | 0.02    | 100.00 |
| dissolved civil part | 1       | 0.00    | 100.00 |
| sep from civil part  | 2       | 0.00    | 100.00 |
| survive from civ par | 2       | 0.00    | 100.00 |
| 98                   | 4       | 0.00    | 100.00 |
| Total                | 238,942 | 100.00  |        |

```
. generate Married = 1 if mastat == 1 | mastat == 2 | mastat == 7
(85900 missing values generated)
```

```
. replace Married = 0 if (mastat >= 3 & mastat <= 6 ) ///
> | (mastat >= 8 & mastat <= 10)
(85319 real changes made)
```

```
.
. tabulate qfachi, gen(Q)
```

| highest academic<br>qualification | Freq.   | Percent | Cum.   |
|-----------------------------------|---------|---------|--------|
| higher degree                     | 5,279   | 2.34    | 2.34   |
| 1st degree                        | 21,343  | 9.48    | 11.82  |
| hnd,hnc,teaching                  | 14,773  | 6.56    | 18.38  |
| a level                           | 40,771  | 18.10   | 36.48  |
| o level                           | 57,600  | 25.57   | 62.05  |
| cse                               | 11,461  | 5.09    | 67.14  |
| none of these                     | 74,010  | 32.86   | 100.00 |
| Total                             | 225,237 | 100.00  |        |

```
.
. tabulate region, gen(R)
```

| region / metropolitan area | Freq.   | Percent | Cum.   |
|----------------------------|---------|---------|--------|
| inner london               | 5,422   | 2.28    | 2.28   |
| outer london               | 10,168  | 4.28    | 6.56   |
| r. of south east           | 32,392  | 13.63   | 20.18  |
| south west                 | 16,013  | 6.74    | 26.92  |
| east anglia                | 7,419   | 3.12    | 30.04  |
| east midlands              | 14,674  | 6.17    | 36.21  |
| west midlands conurbation  | 6,214   | 2.61    | 38.83  |
| r. of west midlands        | 8,895   | 3.74    | 42.57  |
| greater manchester         | 6,698   | 2.82    | 45.38  |
| merseyside                 | 3,673   | 1.55    | 46.93  |
| r. of north west           | 8,038   | 3.38    | 50.31  |
| south yorkshire            | 4,636   | 1.95    | 52.26  |
| west yorkshire             | 5,783   | 2.43    | 54.69  |
| r. of yorks & humberside   | 5,773   | 2.43    | 57.12  |
| tyne & wear                | 3,916   | 1.65    | 58.77  |
| r. of north                | 6,669   | 2.81    | 61.57  |
| wales                      | 32,012  | 13.47   | 75.04  |
| scotland                   | 36,685  | 15.43   | 90.47  |
| northern ireland           | 22,654  | 9.53    | 100.00 |
| Total                      | 237,734 | 100.00  |        |

```
. * Note that the BHPS has two variables for regions
. * We have included in the dataset the variable region (Chapter 4)
. * while we have used region2 in Chapter 7
. * For the purpose of this analysis either of the two variable is ok
.
. tabulate wave, gen(Y)
```

| wave | Freq.  | Percent | Cum.  |
|------|--------|---------|-------|
| 1    | 10,264 | 4.29    | 4.29  |
| 2    | 9,845  | 4.12    | 8.41  |
| 3    | 9,600  | 4.02    | 12.43 |
| 4    | 9,481  | 3.97    | 16.40 |
| 5    | 9,249  | 3.87    | 20.27 |
| 6    | 9,438  | 3.95    | 24.22 |
| 7    | 11,193 | 4.68    | 28.90 |
| 8    | 10,906 | 4.56    | 33.46 |
| 9    | 15,623 | 6.54    | 40.00 |
| 10   | 15,603 | 6.53    | 46.53 |
| 11   | 18,867 | 7.89    | 54.42 |
| 12   | 16,597 | 6.94    | 61.37 |
| 13   | 16,238 | 6.79    | 68.16 |
| 14   | 15,791 | 6.61    | 74.77 |
| 15   | 15,617 | 6.53    | 81.30 |
| 16   | 15,392 | 6.44    | 87.74 |
| 17   | 14,873 | 6.22    | 93.97 |

|       |         |        |        |
|-------|---------|--------|--------|
| 18    | 14,419  | 6.03   | 100.00 |
| <hr/> |         |        |        |
| Total | 238,996 | 100.00 |        |

```
. regress LnW age age2 Female Married Q1-Q6 R1-R6 R8-R19 Y1-Y17, vce(cluster pid)
```

Linear regression

Number of obs = 118152  
F( 45, 19871) = 445.51  
Prob > F = 0.0000  
R-squared = 0.4225  
Root MSE = .6555

(Std. Err. adjusted for 19872 clusters in pid)

| LnW     | Coef.     | Robust Std. Err. | t      | P> t  | [95% Conf. Interval] |           |
|---------|-----------|------------------|--------|-------|----------------------|-----------|
| age     | .1286478  | .0021357         | 60.24  | 0.000 | .1244617             | .1328339  |
| age2    | -.0014963 | .0000273         | -54.82 | 0.000 | -.0015498            | -.0014428 |
| Female  | -.5954364 | .0091211         | -65.28 | 0.000 | -.6133144            | -.5775583 |
| Married | .0836218  | .0098885         | 8.46   | 0.000 | .0642395             | .1030042  |
| Q1      | .8557859  | .0279069         | 30.67  | 0.000 | .801086              | .9104858  |
| Q2      | .7732293  | .0175421         | 44.08  | 0.000 | .7388454             | .8076133  |
| Q3      | .5802515  | .0199772         | 29.05  | 0.000 | .5410944             | .6194086  |
| Q4      | .3825897  | .0155647         | 24.58  | 0.000 | .3520816             | .4130977  |
| Q5      | .2548843  | .0149192         | 17.08  | 0.000 | .2256414             | .2841273  |
| Q6      | .1472545  | .0230412         | 6.39   | 0.000 | .1020918             | .1924172  |
| R1      | .2970708  | .0396943         | 7.48   | 0.000 | .2192668             | .3748749  |
| R2      | .2263073  | .0353401         | 6.40   | 0.000 | .1570378             | .2955767  |
| R3      | .1021207  | .0293211         | 3.48   | 0.000 | .0446489             | .1595926  |
| R4      | -.0436032 | .0322146         | -1.35  | 0.176 | -.1067466            | .0195402  |
| R5      | -.0055331 | .03947           | -0.14  | 0.889 | -.0828976            | .0718314  |
| R6      | -.0247404 | .0315187         | -0.78  | 0.432 | -.0865196            | .0370388  |
| R8      | -.0279208 | .0351009         | -0.80  | 0.426 | -.0967214            | .0408798  |
| R9      | .0842424  | .0380873         | 2.21   | 0.027 | .0095882             | .1588967  |
| R10     | -.0263422 | .0493077         | -0.53  | 0.593 | -.1229894            | .0703049  |
| R11     | .0316676  | .0374119         | 0.85   | 0.397 | -.0416629            | .104998   |
| R12     | -.0308426 | .0409949         | -0.75  | 0.452 | -.111196             | .0495109  |
| R13     | .0164125  | .0388481         | 0.42   | 0.673 | -.0597331            | .0925581  |
| R14     | -.0463138 | .0395713         | -1.17  | 0.242 | -.1238768            | .0312492  |
| R15     | -.0033512 | .0420943         | -0.08  | 0.937 | -.0858596            | .0791572  |
| R16     | -.029627  | .0373852         | -0.79  | 0.428 | -.1029051            | .0436512  |
| R17     | -.0489442 | .0289624         | -1.69  | 0.091 | -.1057129            | .0078246  |
| R18     | -.0021935 | .028497          | -0.08  | 0.939 | -.0580499            | .053663   |
| R19     | -.0143744 | .0294386         | -0.49  | 0.625 | -.0720765            | .0433277  |
| Y1      | -.5855048 | .012819          | -45.67 | 0.000 | -.6106311            | -.5603784 |
| Y2      | -.5477336 | .0129656         | -42.25 | 0.000 | -.5731472            | -.52232   |
| Y3      | -.5481992 | .0130754         | -41.93 | 0.000 | -.5738282            | -.5225703 |
| Y4      | -.5180352 | .0127153         | -40.74 | 0.000 | -.5429583            | -.493112  |
| Y5      | -.4791176 | .0125175         | -38.28 | 0.000 | -.5036529            | -.4545823 |
| Y6      | -.4516823 | .0121378         | -37.21 | 0.000 | -.4754734            | -.4278912 |
| Y7      | -.420277  | .0115062         | -36.53 | 0.000 | -.4428301            | -.3977239 |
| Y8      | -.3742127 | .0110053         | -34.00 | 0.000 | -.395784             | -.3526414 |
| Y9      | -.3230846 | .0097569         | -33.11 | 0.000 | -.3422089            | -.3039602 |
| Y10     | -.2685679 | .009325          | -28.80 | 0.000 | -.2868457            | -.25029   |
| Y11     | -.2337255 | .0089328         | -26.16 | 0.000 | -.2512345            | -.2162165 |
| Y12     | -.1913069 | .0089027         | -21.49 | 0.000 | -.2087568            | -.1738569 |
| Y13     | -.1667044 | .008593          | -19.40 | 0.000 | -.1835474            | -.1498613 |
| Y14     | -.1338277 | .0081453         | -16.43 | 0.000 | -.1497931            | -.1178622 |
| Y15     | -.0895816 | .0077205         | -11.60 | 0.000 | -.1047144            | -.0744488 |
| Y16     | -.0649495 | .0072949         | -8.90  | 0.000 | -.0792482            | -.0506509 |
| Y17     | -.0349726 | .0062894         | -5.56  | 0.000 | -.0473002            | -.0226449 |
| _cons   | 4.566722  | .0480048         | 95.13  | 0.000 | 4.472628             | 4.660815  |

```
. estimates store R_OLS
```

```
. * 9.2.2. Individual Unobserved Heterogeneity
```

```
. xtset pid wave, yearly
panel variable: pid (unbalanced)
```



```
. estimates store R_FE
```

```
. xtreg LnW age age2 Female Married Q1-Q6 R1-R6 R8-R19 Y1-Y17, re
```

```
Random-effects GLS regression      Number of obs      =    118152
Group variable: pid                Number of groups    =     19872
```

```
R-sq:  within = 0.3482              Obs per group: min =      1
       between = 0.4166              avg      =     5.9
       overall = 0.4136              max      =    18
```

```
corr(u_i, X)  = 0 (assumed)         Wald chi2(45)      =   66766.15
                                           Prob > chi2        =    0.0000
```

| LnW     | Coef.     | Std. Err.                         | z       | P> z  | [95% Conf. Interval] |           |
|---------|-----------|-----------------------------------|---------|-------|----------------------|-----------|
| age     | .131641   | .0011158                          | 117.98  | 0.000 | .1294541             | .133828   |
| age2    | -.001501  | .0000136                          | -110.31 | 0.000 | -.0015276            | -.0014743 |
| Female  | -.5743116 | .0089137                          | -64.43  | 0.000 | -.5917821            | -.5568411 |
| Married | .0592975  | .0050105                          | 11.83   | 0.000 | .0494771             | .0691178  |
| Q1      | .9202418  | .0195094                          | 47.17   | 0.000 | .8820041             | .9584796  |
| Q2      | .9201056  | .0131105                          | 70.18   | 0.000 | .8944095             | .9458016  |
| Q3      | .5776996  | .0153609                          | 37.61   | 0.000 | .5475927             | .6078065  |
| Q4      | .4199272  | .0117058                          | 35.87   | 0.000 | .3969843             | .44287    |
| Q5      | .1487272  | .0113168                          | 13.14   | 0.000 | .1265467             | .1709077  |
| Q6      | .1917453  | .0182883                          | 10.48   | 0.000 | .155901              | .2275896  |
| R1      | .3230331  | .0272785                          | 11.84   | 0.000 | .2695682             | .376498   |
| R2      | .183807   | .0249526                          | 7.37    | 0.000 | .1349009             | .2327132  |
| R3      | .0523071  | .0227156                          | 2.30    | 0.021 | .0077853             | .0968288  |
| R4      | -.0627845 | .0246848                          | -2.54   | 0.011 | -.1111657            | -.0144033 |
| R5      | .0241421  | .028872                           | 0.84    | 0.403 | -.0324459            | .0807301  |
| R6      | -.0546337 | .0248438                          | -2.20   | 0.028 | -.1033267            | -.0059407 |
| R8      | -.0741594 | .024461                           | -3.03   | 0.002 | -.122102             | -.0262167 |
| R9      | .0322476  | .0293488                          | 1.10    | 0.272 | -.025275             | .0897703  |
| R10     | -.0496769 | .0362682                          | -1.37   | 0.171 | -.1207612            | .0214074  |
| R11     | -.0357758 | .0282174                          | -1.27   | 0.205 | -.091081             | .0195294  |
| R12     | -.0766626 | .0328599                          | -2.33   | 0.020 | -.1410668            | -.0122584 |
| R13     | -.0166528 | .0299627                          | -0.56   | 0.578 | -.0753785            | .042073   |
| R14     | -.0376158 | .0295663                          | -1.27   | 0.203 | -.0955648            | .0203331  |
| R15     | -.0313594 | .0345605                          | -0.91   | 0.364 | -.0990967            | .0363779  |
| R16     | -.1207815 | .0300735                          | -4.02   | 0.000 | -.1797245            | -.0618385 |
| R17     | -.1040635 | .0237603                          | -4.38   | 0.000 | -.1506328            | -.0574941 |
| R18     | -.0479837 | .0234768                          | -2.04   | 0.041 | -.0939975            | -.0019699 |
| R19     | -.0445019 | .0248392                          | -1.79   | 0.073 | -.0931858            | .004182   |
| Y1      | -.642964  | .0095854                          | -67.08  | 0.000 | -.661751             | -.624177  |
| Y2      | -.608353  | .0095023                          | -64.02  | 0.000 | -.6269771            | -.5897288 |
| Y3      | -.5972179 | .0093759                          | -63.70  | 0.000 | -.6155943            | -.5788415 |
| Y4      | -.5633628 | .0091774                          | -61.39  | 0.000 | -.5813502            | -.5453754 |
| Y5      | -.5317871 | .0090278                          | -58.91  | 0.000 | -.5494812            | -.514093  |
| Y6      | -.500734  | .0088071                          | -56.86  | 0.000 | -.5179955            | -.4834725 |
| Y7      | -.4598571 | .0084075                          | -54.70  | 0.000 | -.4763355            | -.4433787 |
| Y8      | -.4068173 | .0082774                          | -49.15  | 0.000 | -.4230407            | -.3905939 |
| Y9      | -.354888  | .0075734                          | -46.86  | 0.000 | -.3697316            | -.3400445 |
| Y10     | -.2955625 | .0074517                          | -39.66  | 0.000 | -.3101675            | -.2809575 |
| Y11     | -.2563296 | .0070853                          | -36.18  | 0.000 | -.2702165            | -.2424426 |
| Y12     | -.2251837 | .0071101                          | -31.67  | 0.000 | -.2391191            | -.2112483 |
| Y13     | -.1947262 | .0070562                          | -27.60  | 0.000 | -.2085562            | -.1808962 |
| Y14     | -.153633  | .0070054                          | -21.93  | 0.000 | -.1673634            | -.1399027 |
| Y15     | -.1121079 | .0069274                          | -16.18  | 0.000 | -.1256854            | -.0985304 |
| Y16     | -.0816536 | .0068954                          | -11.84  | 0.000 | -.0951682            | -.0681389 |
| Y17     | -.0383292 | .0068617                          | -5.59   | 0.000 | -.0517779            | -.0248805 |
| _cons   | 4.486087  | .0333283                          | 134.60  | 0.000 | 4.420764             | 4.551409  |
| sigma_u | .57939206 |                                   |         |       |                      |           |
| sigma_e | .39939095 |                                   |         |       |                      |           |
| rho     | .67788679 | (fraction of variance due to u_i) |         |       |                      |           |

```
. estimates store R_REgls
```

```
. xtreg LnW age age2 Female Married Q1-Q6 R1-R6 R8-R19 Y1-Y17, mle
```

Fitting constant-only model:

```
Iteration 0: log likelihood = -116742.99
Iteration 1: log likelihood = -109770.91
Iteration 2: log likelihood = -108636.63
Iteration 3: log likelihood = -108569.75
Iteration 4: log likelihood = -108569.09
Iteration 5: log likelihood = -108569.09
```

Fitting full model:

```
Iteration 0: log likelihood = -82924.503
Iteration 1: log likelihood = -82147.409
Iteration 2: log likelihood = -82133.495
Iteration 3: log likelihood = -82133.464
```

Random-effects ML regression  
Group variable: pid

Number of obs = 118152  
Number of groups = 19872

Random effects u\_i ~ Gaussian

Obs per group: min = 1  
avg = 5.9  
max = 18

Log likelihood = -82133.464  
LR chi2(45) = 52871.26  
Prob > chi2 = 0.0000

| LnW     | Coef.     | Std. Err. | z       | P> z  | [95% Conf. Interval] |           |
|---------|-----------|-----------|---------|-------|----------------------|-----------|
| age     | .1317102  | .0011134  | 118.30  | 0.000 | .1295281             | .1338924  |
| age2    | -.0015021 | .0000136  | -110.53 | 0.000 | -.0015287            | -.0014754 |
| Female  | -.5744593 | .0087992  | -65.29  | 0.000 | -.5917054            | -.5572131 |
| Married | .059763   | .0050119  | 11.92   | 0.000 | .0499399             | .069586   |
| Q1      | .9184231  | .0194128  | 47.31   | 0.000 | .8803748             | .9564715  |
| Q2      | .9180993  | .0130387  | 70.41   | 0.000 | .8925439             | .9436548  |
| Q3      | .5773005  | .0152535  | 37.85   | 0.000 | .5474041             | .6071969  |
| Q4      | .4191413  | .0116211  | 36.07   | 0.000 | .3963644             | .4419182  |
| Q5      | .1504781  | .011246   | 13.38   | 0.000 | .1284364             | .1725199  |
| Q6      | .1915279  | .0181309  | 10.56   | 0.000 | .155992              | .2270638  |
| R1      | .3225755  | .0271457  | 11.88   | 0.000 | .269371              | .37578    |
| R2      | .184399   | .024825   | 7.43    | 0.000 | .1357429             | .233055   |
| R3      | .0526578  | .0225819  | 2.33    | 0.020 | .0083981             | .0969176  |
| R4      | -.0626644 | .0245414  | -2.55   | 0.011 | -.1107646            | -.0145642 |
| R5      | .0237758  | .0287096  | 0.83    | 0.408 | -.032494             | .0800456  |
| R6      | -.0541727 | .024699   | -2.19   | 0.028 | -.1025819            | -.0057635 |
| R8      | -.0736903 | .0243591  | -3.03   | 0.002 | -.1214333            | -.0259473 |
| R9      | .0330614  | .0291706  | 1.13    | 0.257 | -.0241119            | .0902346  |
| R10     | -.0489076 | .0360398  | -1.36   | 0.175 | -.1195443            | .021729   |
| R11     | -.0347786 | .0280571  | -1.24   | 0.215 | -.0897695            | .0202123  |
| R12     | -.0757364 | .0326711  | -2.32   | 0.020 | -.1397706            | -.0117021 |
| R13     | -.0165098 | .0297857  | -0.55   | 0.579 | -.0748886            | .0418691  |
| R14     | -.0377106 | .0294022  | -1.28   | 0.200 | -.0953378            | .0199166  |
| R15     | -.0313821 | .0343467  | -0.91   | 0.361 | -.0987004            | .0359361  |
| R16     | -.1197889 | .0298876  | -4.01   | 0.000 | -.1783674            | -.0612103 |
| R17     | -.1032801 | .0235988  | -4.38   | 0.000 | -.1495329            | -.0570272 |
| R18     | -.0473448 | .0233114  | -2.03   | 0.042 | -.0930342            | -.0016553 |
| R19     | -.0441    | .0246423  | -1.79   | 0.074 | -.092398             | .0041981  |
| Y1      | -.642835  | .009559   | -67.25  | 0.000 | -.6615702            | -.6240997 |
| Y2      | -.6083017 | .0094809  | -64.16  | 0.000 | -.6268838            | -.5897195 |
| Y3      | -.5972574 | .0093589  | -63.82  | 0.000 | -.6156005            | -.5789142 |
| Y4      | -.5634353 | .0091641  | -61.48  | 0.000 | -.5813966            | -.5454739 |
| Y5      | -.5318161 | .0090184  | -58.97  | 0.000 | -.5494918            | -.5141405 |
| Y6      | -.5007482 | .0088005  | -56.90  | 0.000 | -.5179969            | -.4834995 |
| Y7      | -.4598554 | .0084027  | -54.73  | 0.000 | -.4763244            | -.4433865 |
| Y8      | -.406805  | .0082759  | -49.16  | 0.000 | -.4230254            | -.3905845 |
| Y9      | -.3548396 | .0075718  | -46.86  | 0.000 | -.3696801            | -.3399991 |
| Y10     | -.2955327 | .0074532  | -39.65  | 0.000 | -.3101406            | -.2809248 |
| Y11     | -.2563086 | .0070886  | -36.16  | 0.000 | -.2702019            | -.2424153 |
| Y12     | -.2251007 | .0071167  | -31.63  | 0.000 | -.2390491            | -.2111522 |
| Y13     | -.1946462 | .0070652  | -27.55  | 0.000 | -.2084937            | -.1807986 |
| Y14     | -.1535624 | .0070163  | -21.89  | 0.000 | -.1673141            | -.1398107 |
| Y15     | -.1120081 | .0069398  | -16.14  | 0.000 | -.1256098            | -.0984064 |
| Y16     | -.0815579 | .0069088  | -11.80  | 0.000 | -.0950989            | -.0680169 |

|       |           |          |        |       |           |           |
|-------|-----------|----------|--------|-------|-----------|-----------|
| Y17   | -.0382984 | .006876  | -5.57  | 0.000 | -.0517751 | -.0248218 |
| _cons | 4.484729  | .0331138 | 135.43 | 0.000 | 4.419827  | 4.549631  |

---

|          |          |          |  |  |          |          |
|----------|----------|----------|--|--|----------|----------|
| /sigma_u | .5719682 | .0034628 |  |  | .5652213 | .5787957 |
| /sigma_e | .4012448 | .0009103 |  |  | .3994645 | .403033  |
| rho      | .6701854 | .0029402 |  |  | .6644027 | .6759277 |

Likelihood-ratio test of sigma\_u=0: chibar2(01)= 7.1e+04 Prob>=chibar2 = 0.000

. estimates store R\_REmle

```
.
. foreach var of varlist LnW age age2 Married Q1-Q6 R1-R6 R8-R19 Y1-Y17 {
2.     generate D`var' = `var' - L.`var'
3. }
```

(145312 missing values generated)

(36339 missing values generated)

(36339 missing values generated)

(36870 missing values generated)

(48920 missing values generated)

(37935 missing values generated)

. regress DLnW Dage Dage2 DMarried DQ1-DQ6 DR1-DR6 DR8-DR19 DY1-DY17

note: DY1 omitted because of collinearity

|          |            |       |            |                 |        |
|----------|------------|-------|------------|-----------------|--------|
| Source   | SS         | df    | MS         | Number of obs = | 91923  |
| Model    | 387.815299 | 43    | 9.01896043 | F( 43, 91879) = | 67.25  |
| Residual | 12321.2552 | 91879 | .134103062 | Prob > F =      | 0.0000 |
|          |            |       |            | R-squared =     | 0.0305 |
|          |            |       |            | Adj R-squared = | 0.0301 |
| Total    | 12709.0705 | 91922 | .138259291 | Root MSE =      | .3662  |

|      |       |           |   |      |                      |
|------|-------|-----------|---|------|----------------------|
| DLnW | Coef. | Std. Err. | t | P> t | [95% Conf. Interval] |
|------|-------|-----------|---|------|----------------------|

|          |           |           |        |       |           |           |
|----------|-----------|-----------|--------|-------|-----------|-----------|
| Dage     | .1331102  | .0049892  | 26.68  | 0.000 | .1233313  | .142889   |
| Dage2    | -.0017975 | .0000472  | -38.10 | 0.000 | -.00189   | -.001705  |
| DMarried | .0033711  | .006088   | 0.55   | 0.580 | -.0085614 | .0153036  |
| DQ1      | .7137446  | .0416376  | 17.14  | 0.000 | .6321353  | .7953539  |
| DQ2      | .6409457  | .0303156  | 21.14  | 0.000 | .5815273  | .700364   |
| DQ3      | .3733625  | .0323761  | 11.53  | 0.000 | .3099057  | .4368194  |
| DQ4      | .2838695  | .0259466  | 10.94  | 0.000 | .2330144  | .3347245  |
| DQ5      | .0750255  | .0250244  | 3.00   | 0.003 | .0259779  | .124073   |
| DQ6      | .0651361  | .0432938  | 1.50   | 0.132 | -.0197194 | .1499916  |
| DR1      | .1395594  | .0503673  | 2.77   | 0.006 | .0408399  | .2382788  |
| DR2      | .0727132  | .0477255  | 1.52   | 0.128 | -.0208283 | .1662547  |
| DR3      | .0819732  | .0455083  | 1.80   | 0.072 | -.0072227 | .171169   |
| DR4      | -.0846344 | .0478141  | -1.77  | 0.077 | -.1783496 | .0090808  |
| DR5      | .009749   | .0586625  | 0.17   | 0.868 | -.1052289 | .1247269  |
| DR6      | -.0240123 | .0491453  | -0.49  | 0.625 | -.1203367 | .0723121  |
| DR8      | -.0070046 | .0431904  | -0.16  | 0.871 | -.0916573 | .0776481  |
| DR9      | -.1377335 | .0581497  | -2.37  | 0.018 | -.2517063 | -.0237607 |
| DR10     | .0148363  | .0744814  | 0.20   | 0.842 | -.1311465 | .1608191  |
| DR11     | -.1175415 | .0556486  | -2.11  | 0.035 | -.2266121 | -.0084709 |
| DR12     | -.1487156 | .0663633  | -2.24  | 0.025 | -.2787869 | -.0186443 |
| DR13     | -.0024974 | .0583953  | -0.04  | 0.966 | -.1169517 | .1119569  |
| DR14     | .0130233  | .0573066  | 0.23   | 0.820 | -.0992971 | .1253436  |
| DR15     | .0452634  | .0723602  | 0.63   | 0.532 | -.0965619 | .1870886  |
| DR16     | -.0941739 | .0638836  | -1.47  | 0.140 | -.2193851 | .0310372  |
| DR17     | -.0997041 | .0544131  | -1.83  | 0.067 | -.2063532 | .0069451  |
| DR18     | -.0972452 | .059679   | -1.63  | 0.103 | -.2142154 | .019725   |
| DR19     | .2954113  | .3687729  | 0.80   | 0.423 | -.4273798 | 1.018202  |
| DY1      | 0         | (omitted) |        |       |           |           |
| DY2      | .0010837  | .0055945  | 0.19   | 0.846 | -.0098814 | .0120487  |
| DY3      | -.0249957 | .0076651  | -3.26  | 0.001 | -.0400192 | -.0099722 |
| DY4      | -.0178592 | .0089998  | -1.98  | 0.047 | -.0354987 | -.0002198 |
| DY5      | -.0152741 | .0098998  | -1.54  | 0.123 | -.0346776 | .0041293  |
| DY6      | -.0166616 | .0104689  | -1.59  | 0.111 | -.0371806 | .0038574  |
| DY7      | -.0048622 | .0107676  | -0.45  | 0.652 | -.0259665 | .0162422  |
| DY8      | .0063962  | .0108193  | 0.59   | 0.554 | -.0148096 | .027602   |
| DY9      | .0264765  | .0107088  | 2.47   | 0.013 | .0054873  | .0474657  |
| DY10     | .0422829  | .0104481  | 4.05   | 0.000 | .0218048  | .062761   |
| DY11     | .0477717  | .0100706  | 4.74   | 0.000 | .0280334  | .0675099  |
| DY12     | .0406726  | .009622   | 4.23   | 0.000 | .0218137  | .0595316  |
| DY13     | .0305542  | .0090539  | 3.37   | 0.001 | .0128086  | .0482997  |
| DY14     | .0290517  | .0083326  | 3.49   | 0.000 | .01272    | .0453834  |
| DY15     | .0248109  | .0074144  | 3.35   | 0.001 | .0102787  | .0393431  |
| DY16     | .0120924  | .0062442  | 1.94   | 0.053 | -.0001462 | .0243311  |
| DY17     | .0119696  | .004551   | 2.63   | 0.009 | .0030497  | .0208896  |
| _cons    | .0795707  | .0037685  | 21.11  | 0.000 | .0721844  | .0869569  |

. estimates store R\_FD

. \* 9.2.3. Choosing the Right Estimator

. hausman R\_FE R\_REgls

Note: the rank of the differenced variance matrix (43) does not equal the number of coefficients being tested (44); be sure this is what

you expect, or there may be problems computing the test. Examine the output of your estimators for anything unexpected and

possibly consider scaling your variables so that the coefficients are on a similar scale.

|         | ---- Coefficients ---- |                |                     |                             |
|---------|------------------------|----------------|---------------------|-----------------------------|
|         | (b)<br>R_FE            | (B)<br>R_REgls | (b-B)<br>Difference | sqrt(diag(V_b-V_B))<br>S.E. |
| age     | .1043769               | .131641        | -.0272641           | .004898                     |
| age2    | -.0014225              | -.001501       | .0000784            | 8.32e-06                    |
| Married | .0373734               | .0592975       | -.021924            | .0022896                    |
| Q1      | 1.054823               | .9202418       | .1345807            | .0230026                    |
| Q2      | 1.037349               | .9201056       | .1172437            | .0189561                    |
| Q3      | .6134338               | .5776996       | .0357342            | .0210607                    |
| Q4      | .4656101               | .4199272       | .0456829            | .0176035                    |



|     |           |           |           |          |
|-----|-----------|-----------|-----------|----------|
| Q5  | .0375515  | .1487272  | -.1111757 | .0174114 |
| Q6  | .1839919  | .1917453  | -.0077534 | .0294941 |
| R1  | .3573327  | .3230331  | .0342995  | .0277985 |
| R2  | .1641015  | .183807   | -.0197055 | .0261627 |
| R3  | .0430553  | .0523071  | -.0092517 | .0255731 |
| R4  | -.0661992 | -.0627845 | -.0034147 | .0270556 |
| R5  | .0538388  | .0241421  | .0296967  | .0309639 |
| R6  | -.0898597 | -.0546337 | -.035226  | .0276865 |
| R8  | -.1039312 | -.0741594 | -.0297718 | .0212141 |
| R9  | -.0349196 | .0322476  | -.0671672 | .0335144 |
| R10 | -.1301058 | -.0496769 | -.080429  | .0421292 |
| R11 | -.1198608 | -.0357758 | -.0840851 | .0310174 |
| R12 | -.1481722 | -.0766626 | -.0715096 | .0358659 |
| R13 | -.0275654 | -.0166528 | -.0109127 | .0338418 |
| R14 | -.0448888 | -.0376158 | -.007273  | .032267  |
| R15 | -.020225  | -.0313594 | .0111344  | .0409281 |
| R16 | -.1797217 | -.1207815 | -.0589402 | .0356746 |
| R17 | -.1987599 | -.1040635 | -.0946965 | .0331672 |
| R18 | -.0961883 | -.0479837 | -.0482046 | .0377875 |
| R19 | .2378655  | -.0445019 | .2823675  | .2308045 |
| Y1  | -1.009186 | -.642964  | -.3662221 | .0826768 |
| Y2  | -.9493102 | -.608353  | -.3409572 | .0779974 |
| Y3  | -.9138993 | -.5972179 | -.3166814 | .0731831 |
| Y4  | -.8566489 | -.5633628 | -.2932861 | .0682117 |
| Y5  | -.8054709 | -.5317871 | -.2736837 | .0632966 |
| Y6  | -.7548958 | -.500734  | -.2541618 | .0586101 |
| Y7  | -.6938853 | -.4598571 | -.2340282 | .0537333 |
| Y8  | -.6204205 | -.4068173 | -.2136032 | .0489376 |
| Y9  | -.5504062 | -.354888  | -.1955181 | .0443916 |
| Y10 | -.4698368 | -.2955625 | -.1742743 | .0396782 |
| Y11 | -.4067139 | -.2563296 | -.1503844 | .0343682 |
| Y12 | -.356345  | -.2251837 | -.1311613 | .0295023 |
| Y13 | -.3035338 | -.1947262 | -.1088076 | .0243736 |
| Y14 | -.240812  | -.153633  | -.087179  | .0194725 |
| Y15 | -.1790856 | -.1121079 | -.0669777 | .0146073 |
| Y16 | -.1278049 | -.0816536 | -.0461513 | .0098124 |
| Y17 | -.0609691 | -.0383292 | -.0226399 | .0049387 |

-----  
b = consistent under Ho and Ha; obtained from xtreg  
B = inconsistent under Ha, efficient under Ho; obtained from xtreg

Test: Ho: difference in coefficients not systematic

chi2(43) = (b-B)'[(V\_b-V\_B)^(-1)](b-B)  
= 955.43  
Prob>chi2 = 0.0000

```
.
.
. * 9.4. Further Estimators
.
. foreach var of varlist age age2 Married Q1-Q6 R1-R6 R8-R19 Y1-Y17 {
2.     bysort pid: egen M`var' = mean(`var')
3.     }
(1 missing value generated)
(1 missing value generated)
(63 missing values generated)
(4866 missing values generated)
(52 missing values generated)
```

```
. xtreg LnW age age2 Female Married Q1-Q6 R1-R6 R8-R19 Y1-Y17 ///
>      Mage Mage2 MMarried MQ1-MQ6 MR1-MR6 MR8-MR19 MY1-MY17, re
```

```
R-sq:  within = 0.3507          Obs per group: min =      1
        between = 0.4326                avg =      5.9
        overall = 0.4245                max =     18
```

| LnW      | Coef.     | Std. Err. | z      | P> z  | [95% Conf. Interval] |
|----------|-----------|-----------|--------|-------|----------------------|
| age      | .1032705  | .0049623  | 20.81  | 0.000 | .0935446 .1129964    |
| age2     | -.0014314 | .0000157  | -91.18 | 0.000 | -.0014622 -.0014006  |
| Female   | -.5753681 | .008888   | -64.74 | 0.000 | -.5927883 -.557948   |
| Married  | .0374408  | .0054677  | 6.85   | 0.000 | .0267243 .0481573    |
| Q1       | 1.041676  | .0298135  | 34.94  | 0.000 | .9832426 1.100109    |
| Q2       | 1.022393  | .02272    | 45.00  | 0.000 | .9778625 1.066923    |
| Q3       | .6020909  | .0257224  | 23.41  | 0.000 | .5516759 .6525058    |
| Q4       | .4521557  | .0208003  | 21.74  | 0.000 | .4113879 .4929235    |
| Q5       | .0320919  | .0204283  | 1.57   | 0.116 | -.007947 .0721307    |
| Q6       | .1791409  | .0342209  | 5.23   | 0.000 | .1120692 .2462127    |
| R1       | .3599292  | .0385575  | 9.33   | 0.000 | .2843579 .4355006    |
| R2       | .1675731  | .0358235  | 4.68   | 0.000 | .0973604 .2377858    |
| R3       | .0433318  | .0338888  | 1.28   | 0.201 | -.023089 .1097525    |
| R4       | -.064945  | .0362788  | -1.79  | 0.073 | -.1360502 .0061602   |
| R5       | .057362   | .0418818  | 1.37   | 0.171 | -.0247248 .1394487   |
| R6       | -.0834021 | .0368585  | -2.26  | 0.024 | -.1556435 -.0111607  |
| R8       | -.1049773 | .0321456  | -3.27  | 0.001 | -.1679814 -.0419732  |
| R9       | -.0245838 | .0441085  | -0.56  | 0.577 | -.111035 .0618674    |
| R10      | -.1207107 | .0550036  | -2.19  | 0.028 | -.2285158 -.0129057  |
| R11      | -.1218096 | .0415127  | -2.93  | 0.003 | -.2031731 -.0404462  |
| R12      | -.1400972 | .0482604  | -2.90  | 0.004 | -.2346859 -.0455086  |
| R13      | -.0196453 | .044788   | -0.44  | 0.661 | -.1074282 .0681377   |
| R14      | -.0374905 | .0433997  | -0.86  | 0.388 | -.1225524 .0475714   |
| R15      | -.018895  | .0529683  | -0.36  | 0.721 | -.1227109 .084921    |
| R16      | -.1711241 | .0462181  | -3.70  | 0.000 | -.26171 -.0805382    |
| R17      | -.1998358 | .0403675  | -4.95  | 0.000 | -.2789546 -.120717   |
| R18      | -.0961071 | .0440034  | -2.18  | 0.029 | -.1823522 -.009862   |
| R19      | .2946758  | .2207271  | 1.34   | 0.182 | -.1379412 .7272929   |
| Y1       | -1.032076 | .0822263  | -12.55 | 0.000 | -1.193236 -.8709151  |
| Y2       | -.9723991 | .0776267  | -12.53 | 0.000 | -1.124545 -.8202536  |
| Y3       | -.9377657 | .0728941  | -12.86 | 0.000 | -1.080636 -.7948958  |
| Y4       | -.878063  | .0679982  | -12.91 | 0.000 | -1.011337 -.744789   |
| Y5       | -.8245562 | .0631702  | -13.05 | 0.000 | -.9483675 -.7007449  |
| Y6       | -.7730871 | .0585574  | -13.20 | 0.000 | -.8878574 -.6583167  |
| Y7       | -.7092784 | .0537357  | -13.20 | 0.000 | -.8145985 -.6039583  |
| Y8       | -.6345921 | .0490402  | -12.94 | 0.000 | -.7307092 -.538475   |
| Y9       | -.5628877 | .0444984  | -12.65 | 0.000 | -.6501031 -.4756724  |
| Y10      | -.4813004 | .0398928  | -12.06 | 0.000 | -.5594888 -.4031119  |
| Y11      | -.4169403 | .0346746  | -12.02 | 0.000 | -.4849012 -.3489794  |
| Y12      | -.3644081 | .0299893  | -12.15 | 0.000 | -.4231861 -.3056301  |
| Y13      | -.3101202 | .0250778  | -12.37 | 0.000 | -.3592718 -.2609687  |
| Y14      | -.2464287 | .0204577  | -12.05 | 0.000 | -.2865251 -.2063323  |
| Y15      | -.1818486 | .0159891  | -11.37 | 0.000 | -.2131866 -.1505106  |
| Y16      | -.1290248 | .0118717  | -10.87 | 0.000 | -.1522929 -.1057567  |
| Y17      | -.0614513 | .0083867  | -7.33  | 0.000 | -.0778889 -.0450137  |
| Mage     | .0242785  | .0053383  | 4.55   | 0.000 | .0138156 .0347414    |
| Mage2    | -.0000534 | .000028   | -1.91  | 0.056 | -.0001083 .1.47e-06  |
| MMarried | .1330876  | .0135267  | 9.84   | 0.000 | .1065757 .1595995    |

|       |           |          |       |       |           |           |
|-------|-----------|----------|-------|-------|-----------|-----------|
| MQ1   | -.197232  | .0418176 | -4.72 | 0.000 | -.279193  | -.1152711 |
| MQ2   | -.2423658 | .0288866 | -8.39 | 0.000 | -.2989825 | -.1857491 |
| MQ3   | -.0309197 | .0326673 | -0.95 | 0.344 | -.0949465 | .0331071  |
| MQ4   | -.0947991 | .0256821 | -3.69 | 0.000 | -.1451351 | -.044463  |
| MQ5   | .2428248  | .0247197 | 9.82  | 0.000 | .194375   | .2912746  |
| MQ6   | -.0039737 | .0404012 | -0.10 | 0.922 | -.0831586 | .0752112  |
| MR1   | -.0833994 | .0568195 | -1.47 | 0.142 | -.1947636 | .0279648  |
| MR2   | .0968522  | .0517744 | 1.87  | 0.061 | -.0046239 | .1983282  |
| MR3   | .0551221  | .0462965 | 1.19  | 0.234 | -.0356173 | .1458616  |
| MR4   | .0187147  | .0498661 | 0.38  | 0.707 | -.079021  | .1164504  |
| MR5   | -.0401287 | .0582863 | -0.69 | 0.491 | -.1543678 | .0741103  |
| MR6   | .0712318  | .0504843 | 1.41  | 0.158 | -.0277156 | .1701793  |
| MR8   | .0808045  | .0495484 | 1.63  | 0.103 | -.0163087 | .1779176  |
| MR9   | .1174451  | .0598444 | 1.96  | 0.050 | .0001523  | .234738   |
| MR10  | .1198042  | .0736671 | 1.63  | 0.104 | -.0245806 | .264189   |
| MR11  | .1702146  | .0572452 | 2.97  | 0.003 | .0580161  | .2824131  |
| MR12  | .1267789  | .0666927 | 1.90  | 0.057 | -.0039364 | .2574942  |
| MR13  | .0284034  | .0611557 | 0.46  | 0.642 | -.0914596 | .1482665  |
| MR14  | -.0052219 | .0606914 | -0.09 | 0.931 | -.1241747 | .113731   |
| MR15  | -.0079391 | .0710263 | -0.11 | 0.911 | -.1471481 | .1312699  |
| MR16  | .1257831  | .0619263 | 2.03  | 0.042 | .0044097  | .2471565  |
| MR17  | .1795631  | .0514651 | 3.49  | 0.000 | .0786934  | .2804328  |
| MR18  | .1222159  | .0539736 | 2.26  | 0.024 | .0164297  | .2280021  |
| MR19  | -.2526131 | .2231571 | -1.13 | 0.258 | -.689993  | .1847669  |
| MY1   | .7379662  | .0981476 | 7.52  | 0.000 | .5456004  | .9303319  |
| MY2   | .7283766  | .1013752 | 7.18  | 0.000 | .5296849  | .9270684  |
| MY3   | .6854077  | .1033294 | 6.63  | 0.000 | .4828859  | .8879296  |
| MY4   | .4895264  | .0996061 | 4.91  | 0.000 | .294302   | .6847508  |
| MY5   | .5388479  | .1002171 | 5.38  | 0.000 | .3424259  | .7352699  |
| MY6   | .5608501  | .0936498 | 5.99  | 0.000 | .3772998  | .7444004  |
| MY7   | .4301485  | .0844071 | 5.10  | 0.000 | .2647137  | .5955833  |
| MY8   | .4475121  | .0883688 | 5.06  | 0.000 | .2743125  | .6207118  |
| MY9   | .5028144  | .0716887 | 7.01  | 0.000 | .3623072  | .6433216  |
| MY10  | .3710919  | .0735963 | 5.04  | 0.000 | .2268459  | .515338   |
| MY11  | .3412066  | .0641701 | 5.32  | 0.000 | .2154356  | .4669777  |
| MY12  | .4226067  | .0705945 | 5.99  | 0.000 | .284244   | .5609694  |
| MY13  | .3683734  | .0724085 | 5.09  | 0.000 | .2264555  | .5102914  |
| MY14  | .361565   | .0760546 | 4.75  | 0.000 | .2125009  | .5106292  |
| MY15  | .3043497  | .0716977 | 4.24  | 0.000 | .1638248  | .4448747  |
| MY16  | .2413729  | .0724207 | 3.33  | 0.001 | .0994309  | .3833149  |
| MY17  | .0419114  | .0825858 | 0.51  | 0.612 | -.1199537 | .2037765  |
| _cons | 4.267563  | .060562  | 70.47 | 0.000 | 4.148863  | 4.386262  |

---

|         |           |                                   |
|---------|-----------|-----------------------------------|
| sigma_u | .57877845 |                                   |
| sigma_e | .39939095 |                                   |
| rho     | .67742387 | (fraction of variance due to u_i) |

---

```

.
.
.
. * Save the results in a table *
. * See Chapter 14 *
. *****
.
. * Table 9.1
. quietly estout R_OLS R_FE R_FD R_RE*                               ///
>   using "$dir\Wages.out",                                           ///
>   cells(b(star fmt(%9.3f)) se(par fmt(%9.3f)))                     ///
>   style(tab) stats(r2 N, fmt(%9.3f %9.0g))                         ///
>   labels(R2 Observations)) label collabels(, none)                 ///
>   starlevels(+ 0.05 * 0.01)                                         ///
>   postfoot("St.err. in parenthesis; + Significant 5%, * Significant 1%") ///
>   replace

.
. log close
.   name: <unnamed>
.   log: C:\My Documents\Example_Chapter9.log
.   log type: text
.   closed on: 29 Jul 2014, 17:46:37

```

---
