# Supplementary material
Source: publisher site journal article supplement (https://uk.sagepub.com/sites/default/files/upm-binaries/74511_AppendixC_LogFiles.zip)
Supplement: Supplementary file 10 [file 74511_AppendixC_LogFiles.zip]

```
*****
* A Practical Guide to Using Panel Data
* Simonetta Longhi and Alita Nandi
* ISER, University of Essex
* Chapter 6
*****
```

```
-----
name: <unnamed>
log: C:\My Documents\\Example_Chapter6.log
log type: text
opened on: 1 Sep 2014, 15:17:37
```

```
.
.
. * Section 6.2.1
. *-----
.
. use "$mydir1/begoalt", clear
. describe
```

```
Contains data from S:\final/begoalt.dta
obs:      29,266
vars:      10
size:     556,054
```

| variable name | storage<br>type | display<br>format | value<br>label | variable label                       |
|---------------|-----------------|-------------------|----------------|--------------------------------------|
| bhid          | long            | %12.0g            |                | household identification number      |
| bpno          | byte            | %8.0g             |                | ego's person number                  |
| bopno         | byte            | %8.0g             | bopno          | alter's person number                |
| brl           | byte            | %8.0g             | brl            | relationship of bopno to bpno        |
| bsex          | byte            | %8.0g             | bsex           | sex                                  |
| bosex         | byte            | %8.0g             | bosex          | alter's sex                          |
| blwstat       | byte            | %8.0g             | blwstat        | alter's residence at last wave       |
| bnwstat       | byte            | %8.0g             | bnwstat        | alter's residence at next wave       |
| pid           | long            | %12.0g            |                | cross-wave person identifier         |
| bopid         | long            | %12.0g            |                | alter's cross-wave person identifier |

```
Sorted by:
```

```
. label list bsex bosex brl
bsex:
```

```
-9 missing or wild
-8 inapplicable
1 male
2 female
```

```
bosex:
```

```
-9 missing or wild
-8 inapplicable
1 male
2 female
```

```
brl:
```

```
-9 missing hh information
0 undefined
2 lawful spouse
3 live-in partner
4 natural child
5 adopted child
6 foster child
7 step/partner's-child
9 daughter/son-in-law
10 natural brother/sister
11 other brother/sister
12 brother/sister-in-law
13 natural parent
14 other parent
15 mother/father-in-law
16 any grand parent
17 any grand child
18 any cousin
```

```

19 any aunt/uncle
20 any nephew/niece
21 any other relative
22 employee
23 lodger/border
24 unrelated sharer
25 step parent
26 employer
27 landlady/lord
28 half-sibling
29 other child
30 other

```

```

.
. generate long daughter_pid = 0

. replace daughter_pid = bopid if (brel==4 & bosex==2)
(3478 real changes made)

.
. generate long brother_pid = 0

. replace brother_pid = bopid if (brel==10 & bosex==1)
(2678 real changes made)

.
. generate long grandmother_pid = 0

. replace grandmother_pid = bopid if (brel==16 & bosex==2)
(96 real changes made)

.
. generate long grandfather_pid = 0

. replace grandfather_pid = bopid if (brel==16 & bosex==1)
(42 real changes made)

.
. generate long spouse_partner_pid = 0

. replace spouse_partner_pid = bopid if (brel>=2 & brel<=3)
(6521 real changes made)

.
.
. keep if spouse_partner_pid>0
(22745 observations deleted)

. duplicates report pid

```

Duplicates in terms of pid

```

-----
copies | observations      surplus
-----+-----
      1 |           6521          0
-----

```

```

.
. merge 1:1 pid using "$mydir1/bindall"

```

```

Result                                     # of obs.
-----
not matched                               6,630
    from master                             0  (_merge==1)
    from using                             6,630  (_merge==2)

matched                                   6,521  (_merge==3)
-----

```

```

. keep if _merge==3
(6630 observations deleted)

```

```

.
. replace bsppid=. if bsppid==0
(0 real changes made)

. corr bsppid spouse_partner_pid
(obs=6521)

-----+-----
      |   bsppid spouse~d
bsppid |   1.0000
spouse_par~d |   1.0000   1.0000

.
.
.
. * Section 6.3
. *-----
.
. use "$mydir1/bindresp", clear

. keep bhid bpno bhgspn bage bsex bqfachi

. drop if bhgspn==0
(3580 observations deleted)

. sort bhid bpno

. save respondent, replace
file respondent.dta saved

.
. use "$mydir1/bindresp", clear

. keep bhid bpno bhgspn bage bsex bqfachi

. drop if bhgspn==0
(3580 observations deleted)

. drop bpno

. rename bhgspn bpno

. foreach var in bsex bage bqfachi {
2.     rename `var' `var'_partner
3. }

.
. label define bsex_partner 1 "male" 2 "female"

. label value bsex bsex_partner

. label var bsex_partner "sex of spouse or partner"

. label var bage_partner "sage of spouse or partner"

.
. sort bhid bpno

. merge 1:1 bhid bpno using respondent
(label bqfachi already defined)
(label bage already defined)
(label bhgspn already defined)
(label bsex already defined)

```

| Result      | # of obs. |              |
|-------------|-----------|--------------|
| not matched | 434       |              |
| from master | 217       | ( _merge==1) |
| from using  | 217       | ( _merge==2) |
| matched     | 6,048     | ( _merge==3) |

```
. keep if _merge==3
(434 observations deleted)

.
. egen bcoupleID=rowmin(bpno  bhgspn)

. generate bcoupleID_alt=cond(bpno < bhgspn, bpno, bhgspn)

.
. tabulate bcoupleID bcoupleID_alt, miss
```

| bcoupleID | bcoupleID_alt |    |    |    |   | Total |
|-----------|---------------|----|----|----|---|-------|
|           | 1             | 2  | 3  | 4  | 5 |       |
| 1         | 5,912         | 0  | 0  | 0  | 0 | 5,912 |
| 2         | 0             | 84 | 0  | 0  | 0 | 84    |
| 3         | 0             | 0  | 38 | 0  | 0 | 38    |
| 4         | 0             | 0  | 0  | 12 | 0 | 12    |
| 5         | 0             | 0  | 0  | 0  | 2 | 2     |
| Total     | 5,912         | 84 | 38 | 12 | 2 | 6,048 |

```
. bysort bhid bcoupleID: keep if _n==1
(3024 observations deleted)
```

```
. save "$dirresults\matched", replace
file C:\My Documents\matched.dta saved
```

```
.
.
. use "$mydir1/bindresp", clear

. keep bhid bpno bhgspn bage bsex bqfachi

. egen bcoupleID=rowmin(bpno  bhgspn) if bhgspn~=0
(3580 missing values generated)

. label var bcoupleID "couple identifier"

.
. drop if bcoupleID == .
(3580 observations deleted)

.
. bysort bhid bcoupleID: generate bage_partner = cond(_n==2, bage[1], bage[2], .)
(217 missing values generated)

. summarize bhid bpno if bage_partner == .
```

| Variable | Obs | Mean     | Std. Dev. | Min     | Max     |
|----------|-----|----------|-----------|---------|---------|
| bhid     | 217 | 2496899  | 297189.4  | 2000628 | 2988828 |
| bpno     | 217 | 1.612903 | .5989337  | 1       | 5       |

```
.
. foreach var in bsex bqfachi {
. 2. bysort bhid bcoupleID: ///
> generate `var'_partner = cond(_n==2, `var'[1], `var'[2], .)
. 3. }
(217 missing values generated)
(217 missing values generated)

.
. label var bage_partner "age of spouse or partner"

. label value bage_partner bage

.
. label var bsex_partner "sex of spouse or partner"

. label value bsex_partner bsex
```

```

.
. label var bqfachi_partner "highest academic qualification of spouse or partner"
. label value bqfachi_partner bqfachi
.
.
. bysort bhid bcoupleID: keep if _n==1
(3024 observations deleted)
.
.
. * Section 6.4
. *-----
.
. label var bage "Age at date of interview"
.
. scatter bage bage_partner, scheme(slmanual) ///
> saving("$dirresults\age_matching", replace)
(file C:\My Documents\age_matching.gph saved)
.
. scatter bage bage_partner || lfit bage bage_partner, scheme(slmanual) ///
> saving("$dirresults\age_matchin2", replace)
(file C:\My Documents\age_matchin2.gph saved)
.
. correlate bage bage_partner
(obs=3024)

```

|              | bage   | bage_p~r |
|--------------|--------|----------|
| bage         | 1.0000 |          |
| bage_partner | 0.9370 | 1.0000   |

```

.
. tabulate bqfachi bqfachi_partner if bqfachi>0 & bqfachi_partner>0, cell nofreq

```

| highest academic qualification | highest academic qualification of spouse or partner | Total  |
|--------------------------------|-----------------------------------------------------|--------|
|                                | higher de 1st degree hnd,hnc,t a level o level      |        |
| higher degree                  | 0.36 0.29 0.25 0.18 0.29                            | 1.43   |
| 1st degree                     | 0.47 2.79 1.00 0.86 1.36                            | 7.27   |
| hnd,hnc,teaching               | 0.11 0.82 1.00 0.64 1.61                            | 5.59   |
| a level                        | 0.18 1.18 1.00 3.33 4.23                            | 13.94  |
| o level                        | 0.29 1.07 1.72 4.87 8.74                            | 26.26  |
| cse                            | 0.04 0.04 0.18 0.93 1.93                            | 4.94   |
| none of these                  | 0.18 0.36 1.29 3.37 7.85                            | 40.56  |
| Total                          | 1.61 6.56 6.45 14.19 26.01                          | 100.00 |

| highest academic qualification | highest academic qualification of spouse or partner | Total  |
|--------------------------------|-----------------------------------------------------|--------|
|                                | cse none of t                                       |        |
| higher degree                  | 0.04 0.04                                           | 1.43   |
| 1st degree                     | 0.07 0.72                                           | 7.27   |
| hnd,hnc,teaching               | 0.11 1.29                                           | 5.59   |
| a level                        | 0.72 3.30                                           | 13.94  |
| o level                        | 1.97 7.60                                           | 26.26  |
| cse                            | 0.68 1.15                                           | 4.94   |
| none of these                  | 1.07 26.44                                          | 40.56  |
| Total                          | 4.66 40.52                                          | 100.00 |

```

.
. tabulate bsex bsex_partner

```

| sex    | sex of spouse or partner |        | Total |
|--------|--------------------------|--------|-------|
|        | male                     | female |       |
| male   | 4                        | 1,514  | 1,518 |
| female | 1,505                    | 1      | 1,506 |
| Total  | 1,509                    | 1,515  | 3,024 |

```
.
. recode bqfachi (1/3=2 high) (4/6 = 1 low) (7=0 none) (-9/-1=.), gen(edu)
(3021 differences between bqfachi and edu)
```

```
. fre edu
```

```
edu -- RECODE of bqfachi (highest academic qualification )
```

|         |        | Freq. | Percent | Valid  | Cum.   |
|---------|--------|-------|---------|--------|--------|
| Valid   | 0 none | 1294  | 39.93   | 41.45  | 41.45  |
|         | 1 low  | 1392  | 42.95   | 44.59  | 86.03  |
|         | 2 high | 436   | 13.45   | 13.97  | 100.00 |
|         | Total  | 3122  | 96.33   | 100.00 |        |
| Missing | .      | 119   | 3.67    |        |        |
| Total   |        | 3241  | 100.00  |        |        |

```
.
. recode bqfachi_partner (1/3=2 high) (4/6 = 1 low) (7=0 none) (-9/-1=.), ///
> gen(edu_partner)
(2836 differences between bqfachi_partner and edu_partner)
```

```
. fre edu_partner
```

```
edu_partner -- RECODE of bqfachi_partner (highest academic qualification of spouse or partner)
```

|         |        | Freq. | Percent | Valid  | Cum.   |
|---------|--------|-------|---------|--------|--------|
| Valid   | 0 none | 1182  | 36.47   | 40.83  | 40.83  |
|         | 1 low  | 1291  | 39.83   | 44.59  | 85.42  |
|         | 2 high | 422   | 13.02   | 14.58  | 100.00 |
|         | Total  | 2895  | 89.32   | 100.00 |        |
| Missing | .      | 346   | 10.68   |        |        |
| Total   |        | 3241  | 100.00  |        |        |

```
.
. tabulate edu edu_partner, cell nofreq
```

| RECODE of bqfachi (highest academic qualification ) |  | RECODE of bqfachi_partner (highest academic qualification of spouse or partner) |       |       | Total  |
|-----------------------------------------------------|--|---------------------------------------------------------------------------------|-------|-------|--------|
|                                                     |  | none                                                                            | low   | high  |        |
| none                                                |  | 26.44                                                                           | 12.29 | 1.83  | 40.56  |
| low                                                 |  | 12.04                                                                           | 27.41 | 5.70  | 45.15  |
| high                                                |  | 2.04                                                                            | 5.16  | 7.09  | 14.30  |
| Total                                               |  | 40.52                                                                           | 44.86 | 14.62 | 100.00 |

```
.
.
. save "$dirresults\matched2", replace
file C:\My Documents\matched2.dta saved
```

```
.
. erase respondent.dta
```

```
.  
. log close  
    name: <unnamed>  
    log: C:\My Documents\\Example_Chapter6.log  
    log type: text  
closed on: 1 Sep 2014, 15:17:45  
-----
```
