# Supplementary material
Source: publisher site journal article supplement (https://uk.sagepub.com/sites/default/files/upm-binaries/74511_AppendixC_LogFiles.zip)
Supplement: Supplementary file 11 [file 74511_AppendixC_LogFiles.zip]

```
*****
* A Practical Guide to Using Panel Data
* Simonetta Longhi and Alita Nandi
* ISER, University of Essex
* Chapter 13
*****
```

```
-----
name: <unnamed>
log: C:\My Documents\Example_Chapter13.log
log type: text
opened on: 1 Sep 2014, 15:35:07
```

```
.
.
. * Secion 13.1
. *-----
```

```
. use "$datadir/xwavedat", clear
```

```
. keep pid racel doby dobm
```

```
. duplicates report pid
```

```
Duplicates in terms of pid
```

```
-----
copies | observations      surplus
-----+-----
      1 |           43272         0
-----
```

```
. sort pid
```

```
. save temp, replace
(note: file temp.dta not found)
file temp.dta saved
```

```
.
. use "$datadir/bindresp", clear
```

```
. keep pid bsex bdoi bdoim bregion2
```

```
. duplicates report pid
```

```
Duplicates in terms of pid
```

```
-----
copies | observations      surplus
-----+-----
      1 |           9845         0
-----
```

```
. sort pid
```

```
. merge 1:1 pid using temp
```

```
Result                                     # of obs.
-----
not matched                               33,427
  from master                               0  (_merge==1)
  from using                               33,427 (_merge==2)

matched                                   9,845  (_merge==3)
-----
```

```
. keep if _merge==3
(33427 observations deleted)
```

```
. drop _merge
```

```
. save temp, replace
```

file temp.dta saved

```
. use "$datadir/blifemst.dta", clear  
. duplicates report pid
```

Duplicates in terms of pid

| -----       |              |         |
|-------------|--------------|---------|
| copies      | observations | surplus |
| -----+----- |              |         |
| 1           | 1464         | 0       |
| 2           | 2982         | 1491    |
| 3           | 4608         | 3072    |
| 4           | 6212         | 4659    |
| 5           | 5305         | 4244    |
| 6           | 4314         | 3595    |
| 7           | 3094         | 2652    |
| 8           | 2288         | 2002    |
| 9           | 1512         | 1344    |
| 10          | 1130         | 1017    |
| 11          | 572          | 520     |
| 12          | 588          | 539     |
| 13          | 468          | 432     |
| 14          | 322          | 299     |
| 15          | 150          | 140     |
| 16          | 96           | 90      |
| 17          | 68           | 64      |
| 18          | 54           | 51      |
| 20          | 60           | 57      |
| 21          | 42           | 40      |
| 25          | 25           | 24      |
| 26          | 52           | 50      |
| 30          | 30           | 29      |
| 38          | 38           | 37      |
| -----       |              |         |

```
. duplicates report pid bleshno
```

Duplicates in terms of pid bleshno

| -----       |              |         |
|-------------|--------------|---------|
| copies      | observations | surplus |
| -----+----- |              |         |
| 1           | 35474        | 0       |
| -----       |              |         |

```
. describe
```

Contains data from S:\final\blifemst.dta

```
obs:      35,474  
vars:      13  
size:     780,428
```

| -----         |              |                |             |                                          |
|---------------|--------------|----------------|-------------|------------------------------------------|
| variable name | storage type | display format | value label | variable label                           |
| -----         |              |                |             |                                          |
| bhid          | long         | %12.0g         |             | household identification number          |
| bpno          | byte         | %8.0g          |             | person number                            |
| bleshno       | byte         | %8.0g          |             | lifetime employment history event number |
| bleshst       | byte         | %8.0g          | bleshst     | lifetime employment history status       |
| bleshem       | byte         | %8.0g          | bleshem     | month lifetime emp. hist. status changed |
| bleshey       | byte         | %8.0g          | bleshey     | year lifetime emp. history status change |
| bleshne       | byte         | %8.0g          | bleshne     | lifetime emp. history status not ended   |
| bleshsm       | byte         | %8.0g          | bleshsm     | month lifetime emp. hist. status started |
| bleshsy       | byte         | %8.0g          | bleshsy     | year lifetime emp. history status starte |
| bleslen       | int          | %8.0g          | bleslen     | length of emp. history spell (months)    |
| bleshey4      | int          | %8.0g          | bleshey4    | year emp. history status changed: 4 digi |
| bleshsy4      | int          | %8.0g          | bleshsy4    | year emp. history status started: 4 digi |
| pid           | long         | %12.0g         |             | cross-wave person identifier             |
| -----         |              |                |             |                                          |

Sorted by:

```
. summarize
```

| Variable | Obs   | Mean      | Std. Dev. | Min      | Max      |
|----------|-------|-----------|-----------|----------|----------|
| bhid     | 35474 | 2503447   | 289763.2  | 2000024  | 2994534  |
| bpno     | 35474 | 1.598241  | .7876311  | 1        | 10       |
| bleshno  | 35474 | 3.314061  | 2.548213  | 1        | 38       |
| bleshst  | 35474 | 4.031516  | 2.711942  | -9       | 12       |
| bleshem  | 35474 | 3.394402  | 7.780118  | -9       | 16       |
| bleshey  | 35474 | 53.75216  | 38.6545   | -9       | 93       |
| bleshne  | 35474 | -5.711451 | 3.919353  | -9       | 1        |
| bleshsm  | 35474 | 7.120877  | 4.355543  | -9       | 16       |
| bleshsy  | 35474 | 71.7634   | 17.79221  | -9       | 96       |
| bleslen  | 35474 | 88.42411  | 119.0971  | -9       | 830      |
| bleshey4 | 35474 | 1466.406  | 866.0848  | -9       | 1993     |
| bleshsy4 | 35474 | 1965.658  | 113.0562  | -9       | 1996     |
| pid      | 35474 | 1.53e+07  | 3328086   | 1.00e+07 | 2.93e+07 |

```
. sort pid
```

```
. merge m:1 pid using temp
```

| Result      | # of obs.          |
|-------------|--------------------|
| not matched | 819                |
| from master | 0 (_merge==1)      |
| from using  | 819 (_merge==2)    |
| matched     | 35,474 (_merge==3) |

```
. keep if _merge==3
(819 observations deleted)
```

```
.
. fre racel
```

```
racel -- ethnic group membership (long version)
```

|       |                           | Freq. | Percent | Valid  | Cum.   |
|-------|---------------------------|-------|---------|--------|--------|
| Valid | -8 inapplicable           | 14463 | 40.77   | 40.77  | 40.77  |
|       | 1 white british           | 16537 | 46.62   | 46.62  | 87.39  |
|       | 2 white irish             | 268   | 0.76    | 0.76   | 88.14  |
|       | 3 white welsh             | 889   | 2.51    | 2.51   | 90.65  |
|       | 4 white scottish          | 1593  | 4.49    | 4.49   | 95.14  |
|       | 5 other white b'ground    | 1071  | 3.02    | 3.02   | 98.16  |
|       | 6 mix w & b caribbean     | 35    | 0.10    | 0.10   | 98.26  |
|       | 7 mixed w & b african     | 19    | 0.05    | 0.05   | 98.31  |
|       | 8 mix white and asian     | 11    | 0.03    | 0.03   | 98.34  |
|       | 9 other mixed b'ground    | 21    | 0.06    | 0.06   | 98.40  |
|       | 10 asian/brit indian      | 222   | 0.63    | 0.63   | 99.03  |
|       | 11 asian/brit pakistani   | 38    | 0.11    | 0.11   | 99.13  |
|       | 12 asian/brit bangladeshi | 7     | 0.02    | 0.02   | 99.15  |
|       | 13 other asian b'ground   | 35    | 0.10    | 0.10   | 99.25  |
|       | 14 black/brit caribbean   | 66    | 0.19    | 0.19   | 99.44  |
|       | 15 black/brit african     | 17    | 0.05    | 0.05   | 99.49  |
|       | 16 other black b'ground   | 13    | 0.04    | 0.04   | 99.52  |
|       | 17 chinese                | 36    | 0.10    | 0.10   | 99.63  |
|       | 18 any other              | 133   | 0.37    | 0.37   | 100.00 |
|       | Total                     | 35474 | 100.00  | 100.00 |        |

```
. recode racel 1/5=1 6/18=0 -9/-1=., gen(white)
(18937 differences between racel and white)
```

```
. label var white "ethnic group"
```

```
. label define white 1 "white" 0 "non-white"
```

```
. label values white white
```

```
. tabulate racel white, m
```

| ethnic group<br>membership (long<br>version) | non-white | white  | .      | Total  |
|----------------------------------------------|-----------|--------|--------|--------|
| inapplicable                                 | 0         | 0      | 14,463 | 14,463 |
| white british                                | 0         | 16,537 | 0      | 16,537 |
| white irish                                  | 0         | 268    | 0      | 268    |
| white welsh                                  | 0         | 889    | 0      | 889    |
| white scottish                               | 0         | 1,593  | 0      | 1,593  |
| other white b'ground                         | 0         | 1,071  | 0      | 1,071  |
| mix w & b caribbean                          | 35        | 0      | 0      | 35     |
| mixed w & b african                          | 19        | 0      | 0      | 19     |
| mix white and asian                          | 11        | 0      | 0      | 11     |
| other mixed b'ground                         | 21        | 0      | 0      | 21     |
| asian/brit indian                            | 222       | 0      | 0      | 222    |
| asian/brit pakistani                         | 38        | 0      | 0      | 38     |
| asian/brit bangladesh                        | 7         | 0      | 0      | 7      |
| other asian b'ground                         | 35        | 0      | 0      | 35     |
| black/brit caribbean                         | 66        | 0      | 0      | 66     |
| black/brit african                           | 17        | 0      | 0      | 17     |
| other black b'ground                         | 13        | 0      | 0      | 13     |
| chinese                                      | 36        | 0      | 0      | 36     |
| any other                                    | 133       | 0      | 0      | 133    |
| Total                                        | 653       | 20,358 | 14,463 | 35,474 |

```
.  
. fre bsex
```

```
bsex -- sex
```

|       |          | Freq. | Percent | Valid  | Cum.   |
|-------|----------|-------|---------|--------|--------|
| Valid | 1 male   | 13909 | 39.21   | 39.21  | 39.21  |
|       | 2 female | 21565 | 60.79   | 60.79  | 100.00 |
|       | Total    | 35474 | 100.00  | 100.00 |        |

```
. recode bsex 1=0 2=1 -9/-1=., gen(female)  
(35474 differences between bsex and female)
```

```
. label var female "gender"
```

```
. label define female 1 "female" 0 "male"
```

```
. label values female female
```

```
. tabulate bsex female, m
```

| sex    | gender<br>male | female | Total  |
|--------|----------------|--------|--------|
| male   | 13,909         | 0      | 13,909 |
| female | 0              | 21,565 | 21,565 |
| Total  | 13,909         | 21,565 | 35,474 |

```
.  
. generate london=bregion2==7  
. generate north=inlist(bregion2,1,2,3)  
. generate midlands=inlist(bregion2,4,5)  
. generate stheast=inlist(bregion2,6,8,9)  
. generate wales=bregion2==10
```

```

. generate scotland=bregion2==11

. foreach v in london north midlands stheast wales scotland {
2.     replace `v'=. if bregion2<0
3.     tabulate bregion2 `v', missing
4.     label var `v' "region of residence: `v'"
5. }
(246 real changes made, 246 to missing)

```

| government office<br>region | london |       | .   | Total  |
|-----------------------------|--------|-------|-----|--------|
|                             | 0      | 1     |     |        |
| missing                     | 0      | 0     | 246 | 246    |
| north east                  | 1,764  | 0     | 0   | 1,764  |
| north west                  | 4,535  | 0     | 0   | 4,535  |
| yorkshire & humber          | 3,541  | 0     | 0   | 3,541  |
| east midlands               | 2,652  | 0     | 0   | 2,652  |
| west midlands               | 2,994  | 0     | 0   | 2,994  |
| east of england             | 2,927  | 0     | 0   | 2,927  |
| london                      | 0      | 3,485 | 0   | 3,485  |
| south east                  | 4,745  | 0     | 0   | 4,745  |
| south west                  | 3,317  | 0     | 0   | 3,317  |
| wales                       | 1,939  | 0     | 0   | 1,939  |
| scotland                    | 3,329  | 0     | 0   | 3,329  |
| Total                       | 31,743 | 3,485 | 246 | 35,474 |

(246 real changes made, 246 to missing)

| government office<br>region | north  |       | .   | Total  |
|-----------------------------|--------|-------|-----|--------|
|                             | 0      | 1     |     |        |
| missing                     | 0      | 0     | 246 | 246    |
| north east                  | 0      | 1,764 | 0   | 1,764  |
| north west                  | 0      | 4,535 | 0   | 4,535  |
| yorkshire & humber          | 0      | 3,541 | 0   | 3,541  |
| east midlands               | 2,652  | 0     | 0   | 2,652  |
| west midlands               | 2,994  | 0     | 0   | 2,994  |
| east of england             | 2,927  | 0     | 0   | 2,927  |
| london                      | 3,485  | 0     | 0   | 3,485  |
| south east                  | 4,745  | 0     | 0   | 4,745  |
| south west                  | 3,317  | 0     | 0   | 3,317  |
| wales                       | 1,939  | 0     | 0   | 1,939  |
| scotland                    | 3,329  | 0     | 0   | 3,329  |
| Total                       | 25,388 | 9,840 | 246 | 35,474 |

(246 real changes made, 246 to missing)

| government office<br>region | midlands |       | .   | Total  |
|-----------------------------|----------|-------|-----|--------|
|                             | 0        | 1     |     |        |
| missing                     | 0        | 0     | 246 | 246    |
| north east                  | 1,764    | 0     | 0   | 1,764  |
| north west                  | 4,535    | 0     | 0   | 4,535  |
| yorkshire & humber          | 3,541    | 0     | 0   | 3,541  |
| east midlands               | 0        | 2,652 | 0   | 2,652  |
| west midlands               | 0        | 2,994 | 0   | 2,994  |
| east of england             | 2,927    | 0     | 0   | 2,927  |
| london                      | 3,485    | 0     | 0   | 3,485  |
| south east                  | 4,745    | 0     | 0   | 4,745  |
| south west                  | 3,317    | 0     | 0   | 3,317  |
| wales                       | 1,939    | 0     | 0   | 1,939  |
| scotland                    | 3,329    | 0     | 0   | 3,329  |
| Total                       | 29,582   | 5,646 | 246 | 35,474 |

(246 real changes made, 246 to missing)

| government office<br>region | stheast |   | . | Total |
|-----------------------------|---------|---|---|-------|
|                             | 0       | 1 |   |       |

|                    |        |        |     |        |
|--------------------|--------|--------|-----|--------|
| missing            | 0      | 0      | 246 | 246    |
| north east         | 1,764  | 0      | 0   | 1,764  |
| north west         | 4,535  | 0      | 0   | 4,535  |
| yorkshire & humber | 3,541  | 0      | 0   | 3,541  |
| east midlands      | 2,652  | 0      | 0   | 2,652  |
| west midlands      | 2,994  | 0      | 0   | 2,994  |
| east of england    | 0      | 2,927  | 0   | 2,927  |
| london             | 3,485  | 0      | 0   | 3,485  |
| south east         | 0      | 4,745  | 0   | 4,745  |
| south west         | 0      | 3,317  | 0   | 3,317  |
| wales              | 1,939  | 0      | 0   | 1,939  |
| scotland           | 3,329  | 0      | 0   | 3,329  |
| Total              | 24,239 | 10,989 | 246 | 35,474 |

(246 real changes made, 246 to missing)

|                          |        |         |     |        |
|--------------------------|--------|---------|-----|--------|
| government office region | 0      | wales 1 | .   | Total  |
| missing                  | 0      | 0       | 246 | 246    |
| north east               | 1,764  | 0       | 0   | 1,764  |
| north west               | 4,535  | 0       | 0   | 4,535  |
| yorkshire & humber       | 3,541  | 0       | 0   | 3,541  |
| east midlands            | 2,652  | 0       | 0   | 2,652  |
| west midlands            | 2,994  | 0       | 0   | 2,994  |
| east of england          | 2,927  | 0       | 0   | 2,927  |
| london                   | 3,485  | 0       | 0   | 3,485  |
| south east               | 4,745  | 0       | 0   | 4,745  |
| south west               | 3,317  | 0       | 0   | 3,317  |
| wales                    | 0      | 1,939   | 0   | 1,939  |
| scotland                 | 3,329  | 0       | 0   | 3,329  |
| Total                    | 33,289 | 1,939   | 246 | 35,474 |

(246 real changes made, 246 to missing)

|                          |        |            |     |        |
|--------------------------|--------|------------|-----|--------|
| government office region | 0      | scotland 1 | .   | Total  |
| missing                  | 0      | 0          | 246 | 246    |
| north east               | 1,764  | 0          | 0   | 1,764  |
| north west               | 4,535  | 0          | 0   | 4,535  |
| yorkshire & humber       | 3,541  | 0          | 0   | 3,541  |
| east midlands            | 2,652  | 0          | 0   | 2,652  |
| west midlands            | 2,994  | 0          | 0   | 2,994  |
| east of england          | 2,927  | 0          | 0   | 2,927  |
| london                   | 3,485  | 0          | 0   | 3,485  |
| south east               | 4,745  | 0          | 0   | 4,745  |
| south west               | 3,317  | 0          | 0   | 3,317  |
| wales                    | 1,939  | 0          | 0   | 1,939  |
| scotland                 | 0      | 3,329      | 0   | 3,329  |
| Total                    | 31,899 | 3,329      | 246 | 35,474 |

```
.
. rename bleshsy4 start_year
. rename bleshtm start_month
. rename bleshey4 end_year
. rename bleshem end_month
. rename bleshno spellno
. rename bleshst activity_status
. rename bleshne spell_ongoing
. rename bdoiyear intv_year
```

```

. rename bdoim      intv_month

.
. label copy bleshsy4 start_year
. label copy bleshsm  start_month
. label copy bleshey4 end_year
. label copy bleshem  end_month
. label copy bleshst  activity_status
. label copy bleshne  spell_ongoing
. label copy bdoi_y  intv_year
. label copy bdoim  intv_month

.
. foreach v in start_year start_month end_year end_month activity_status ///
>     spell_ongoing intv_year intv_month {
  2.         lab val `v' `v'
  3. }

. drop bleshey bleshsy bhid bpno _merge bleslen

. describe

```

Contains data from S:\final\blifemst.dta

```

obs:      35,474
vars:      23
size:     1,667,278

```

| variable name   | storage type | display format | value label     | variable label                           |
|-----------------|--------------|----------------|-----------------|------------------------------------------|
| spellno         | byte         | %8.0g          |                 | lifetime employment history event number |
| activity_status | byte         | %23.0g         | activity_status | lifetime employment history status       |
| end_month       | byte         | %15.0g         | end_month       | month lifetime emp. hist. status changed |
| spell_ongoing   | byte         | %15.0g         | spell_ongoing   | lifetime emp. history status not ended   |
| start_month     | byte         | %15.0g         | start_month     | month lifetime emp. hist. status started |
| end_year        | int          | %23.0g         | end_year        | year emp. history status changed: 4 digi |
| start_year      | int          | %23.0g         | start_year      | year emp. history status started: 4 digi |
| pid             | long         | %12.0g         |                 | cross-wave person identifier             |
| intv_month      | byte         | %15.0g         | intv_month      | date of interview: month                 |
| intv_year       | byte         | %15.0g         | intv_year       | date of interview: year                  |
| bsex            | byte         | %8.0g          | bsex            | sex                                      |
| bregion2        | byte         | %8.0g          | bregion2        | government office region                 |
| dobm            | byte         | %8.0g          | dobm            | month of birth                           |
| doby            | int          | %8.0g          | doby            | year of birth                            |
| racel           | byte         | %8.0g          | racel           | ethnic group membership (long version)   |
| white           | byte         | %9.0g          | white           | ethnic group                             |
| female          | byte         | %9.0g          | female          | gender                                   |
| london          | float        | %9.0g          |                 | region of residence: london              |
| north           | float        | %9.0g          |                 | region of residence: north               |
| midlands        | float        | %9.0g          |                 | region of residence: midlands            |
| stheast         | float        | %9.0g          |                 | region of residence: stheast             |
| wales           | float        | %9.0g          |                 | region of residence: wales               |
| scotland        | float        | %9.0g          |                 | region of residence: scotland            |

Sorted by:

Note: dataset has changed since last saved

```

. summarize

```

| Variable     | Obs   | Mean      | Std. Dev. | Min      | Max      |
|--------------|-------|-----------|-----------|----------|----------|
| spellno      | 35474 | 3.314061  | 2.548213  | 1        | 38       |
| activity_s~s | 35474 | 4.031516  | 2.711942  | -9       | 12       |
| end_month    | 35474 | 3.394402  | 7.780118  | -9       | 16       |
| spell_ongo~g | 35474 | -5.711451 | 3.919353  | -9       | 1        |
| start_month  | 35474 | 7.120877  | 4.355543  | -9       | 16       |
| end_year     | 35474 | 1466.406  | 866.0848  | -9       | 1993     |
| start_year   | 35474 | 1965.658  | 113.0562  | -9       | 1996     |
| pid          | 35474 | 1.53e+07  | 3328086   | 1.00e+07 | 2.93e+07 |
| intv_month   | 35474 | 9.543328  | 1.361254  | 1        | 12       |
| intv_year    | 35474 | 92.02534  | .1571654  | 92       | 93       |
| bsex         | 35474 | 1.60791   | .4882235  | 1        | 2        |
| bregion2     | 35474 | 5.936742  | 3.289755  | -9       | 11       |
| dobm         | 35474 | 6.459069  | 3.391969  | 1        | 12       |
| doby         | 35474 | 1944.427  | 25.18917  | -9       | 1976     |
| racel        | 35474 | -2.143739 | 5.181514  | -8       | 18       |
| white        | 21011 | .968921   | .1735353  | 0        | 1        |
| female       | 35474 | .60791    | .4882235  | 0        | 1        |
| london       | 35228 | .098927   | .2985682  | 0        | 1        |
| north        | 35228 | .2793233  | .448673   | 0        | 1        |
| midlands     | 35228 | .1602702  | .3668617  | 0        | 1        |
| stheast      | 35228 | .3119394  | .4632918  | 0        | 1        |
| wales        | 35228 | .0550414  | .2280644  | 0        | 1        |
| scotland     | 35228 | .0944987  | .2925254  | 0        | 1        |

```
.
. sort pid spellno
```

```
. save duration, replace
file duration.dta saved
```

```
.
. replace intv_year=intv_year+1900
intv_year was byte now int
(35474 real changes made)
```

```
.
. replace end_month=intv_month if spell_ongoing==1
(9021 real changes made)
```

```
. replace end_year=intv_year if spell_ongoing==1
(9021 real changes made)
```

```
.
. foreach v in start end {
2.     replace `v'_month = 1 if `v'_month==13 & `v'_year<. & `v'_year>0
3.     replace `v'_month = 4 if `v'_month==14 & `v'_year<. & `v'_year>0
4.     replace `v'_month = 7 if `v'_month==15 & `v'_year<. & `v'_year>0
5.     replace `v'_month = 10 if `v'_month==16 & `v'_year<. & `v'_year>0
6.     replace `v'_month = 6 if `v'_month== -1 & `v'_year<. & `v'_year>0
7. }
(772 real changes made)
(1005 real changes made)
(1660 real changes made)
(808 real changes made)
(2208 real changes made)
(736 real changes made)
(907 real changes made)
(1410 real changes made)
(794 real changes made)
(1750 real changes made)
```

```
.
. fre activity_status
```

```
activity_status -- lifetime employment history status
```

|  | Freq. | Percent | Valid | Cum. |
|--|-------|---------|-------|------|
|--|-------|---------|-------|------|



|       |                         |       |        |        |        |
|-------|-------------------------|-------|--------|--------|--------|
| Valid | -9 missing or wild      | 8     | 0.02   | 0.02   | 0.02   |
|       | -2 refused              | 1     | 0.00   | 0.00   | 0.03   |
|       | -1 can't remember       | 1     | 0.00   | 0.00   | 0.03   |
|       | 1 self-employed         | 1555  | 4.38   | 4.38   | 4.41   |
|       | 2 f/t paid employment   | 14397 | 40.58  | 40.58  | 45.00  |
|       | 3 p/t paid employment   | 4451  | 12.55  | 12.55  | 57.54  |
|       | 4 unemployed            | 4252  | 11.99  | 11.99  | 69.53  |
|       | 5 retired               | 1568  | 4.42   | 4.42   | 73.95  |
|       | 6 maternity leave       | 678   | 1.91   | 1.91   | 75.86  |
|       | 7 family care           | 5053  | 14.24  | 14.24  | 90.11  |
|       | 8 ft studt, school      | 829   | 2.34   | 2.34   | 92.44  |
|       | 9 lt sick, disabl       | 512   | 1.44   | 1.44   | 93.89  |
|       | 10 gvt trng scheme      | 681   | 1.92   | 1.92   | 95.81  |
|       | 11 national/war service | 806   | 2.27   | 2.27   | 98.08  |
|       | 12 something else       | 682   | 1.92   | 1.92   | 100.00 |
|       | Total                   | 35474 | 100.00 | 100.00 |        |

```
. generate unempdur=((end_year-start_year)*12) + ///
> (end_month-start_month) if activity_status==4 ///
> & start_year>0 & end_year>0 & start_month>0 & end_month>0 ///
> & start_year<. & end_year<. & start_month<. & end_month<.
(31242 missing values generated)
```

```
.
. generate censored=1 if spell_ongoing==1
(26453 missing values generated)
```

```
. replace censored=0 if spell_ongoing== -8
(26448 real changes made)
```

```
.
. tabulate unempdur if unempdur<0
```

| unempdur | Freq. | Percent | Cum.   |
|----------|-------|---------|--------|
| -9       | 11    | 24.44   | 24.44  |
| -6       | 18    | 40.00   | 64.44  |
| -5       | 4     | 8.89    | 73.33  |
| -4       | 1     | 2.22    | 75.56  |
| -3       | 2     | 4.44    | 80.00  |
| -2       | 4     | 8.89    | 88.89  |
| -1       | 5     | 11.11   | 100.00 |
| Total    | 45    | 100.00  |        |

```
.
. * browse pid spellno activity_status unempdur activity_status start_year ///
> start_month end_year end_month if unempdur<0
.
. fre activity_status if unempdur==.
```

activity\_status -- lifetime employment history status

|       |                         | Freq. | Percent | Valid  | Cum.   |
|-------|-------------------------|-------|---------|--------|--------|
| Valid | -9 missing or wild      | 8     | 0.03    | 0.03   | 0.03   |
|       | -2 refused              | 1     | 0.00    | 0.00   | 0.03   |
|       | -1 can't remember       | 1     | 0.00    | 0.00   | 0.03   |
|       | 1 self-employed         | 1555  | 4.98    | 4.98   | 5.01   |
|       | 2 f/t paid employment   | 14397 | 46.08   | 46.08  | 51.09  |
|       | 3 p/t paid employment   | 4451  | 14.25   | 14.25  | 65.34  |
|       | 4 unemployed            | 20    | 0.06    | 0.06   | 65.40  |
|       | 5 retired               | 1568  | 5.02    | 5.02   | 70.42  |
|       | 6 maternity leave       | 678   | 2.17    | 2.17   | 72.59  |
|       | 7 family care           | 5053  | 16.17   | 16.17  | 88.77  |
|       | 8 ft studt, school      | 829   | 2.65    | 2.65   | 91.42  |
|       | 9 lt sick, disabl       | 512   | 1.64    | 1.64   | 93.06  |
|       | 10 gvt trng scheme      | 681   | 2.18    | 2.18   | 95.24  |
|       | 11 national/war service | 806   | 2.58    | 2.58   | 97.82  |
|       | 12 something else       | 682   | 2.18    | 2.18   | 100.00 |
|       | Total                   | 31242 | 100.00  | 100.00 |        |

```

. drop if unempdur<0
(45 observations deleted)

. drop if unempdur==.
(31242 observations deleted)

. keep if activity_status==4
(0 observations deleted)

. bysort pid (spellno): keep if _n==1
(1500 observations deleted)

. list pid spellno unempdur activity_status censored in 1/10, sepby(pid)

```

|     | pid      | spellno | unempdur | activity~s | censored |
|-----|----------|---------|----------|------------|----------|
| 1.  | 10004491 | 2       | 22       | unemployed | 1        |
| 2.  | 10004521 | 2       | 19       | unemployed | 1        |
| 3.  | 10016813 | 3       | 5        | unemployed | 0        |
| 4.  | 10017968 | 2       | 3        | unemployed | 0        |
| 5.  | 10020179 | 2       | 12       | unemployed | 0        |
| 6.  | 10020233 | 3       | 2        | unemployed | 0        |
| 7.  | 10024646 | 2       | 24       | unemployed | 0        |
| 8.  | 10028005 | 2       | 12       | unemployed | 0        |
| 9.  | 10029133 | 3       | 3        | unemployed | 0        |
| 10. | 10040366 | 2       | 4        | unemployed | 0        |

```

. duplicates report pid

```

Duplicates in terms of pid

| copies | observations | surplus |
|--------|--------------|---------|
| 1      | 2687         | 0       |

```

. generate age=(start_year-doby)+((start_month-dobm)*12) ///
> if start_year>=0 & doby>=0 & start_month>=0 & dobm>=0 ///
> & start_year<. & doby<. & start_month<. & dobm<.

```

```

. save duration_continuous, replace
file duration_continuous.dta saved

```

```

. expand unempdur
(88 zero counts ignored; observations not deleted)
(33475 observations created)

```

```

. bysort pid: generate monthid=_n

```

```

. generate spellended=0

```

```

. bysort pid (monthid): replace spellended =1 if _n==_N & censored==0
(2403 real changes made)

```

```

.
. save duration_discrete, replace
file duration_discrete.dta saved

.
. erase temp.dta

.
.
. * Secion 13.2.1
. *-----
.
. use duration_continuous, clear

. stset unempdur, failure(censored==0)

      failure event:  censored == 0
obs. time interval:  (0, unempdur]
exit on or before:  failure

-----
      2687  total observations
           88  observations end on or before enter()
-----
      2599  observations remaining, representing
      2335  failures in single-record/single-failure data
      36074 total analysis time at risk and under observation
                                at risk from t =          0
                                earliest observed entry t =      0
                                last observed exit t =         504

. st
-> stset unempdur, failure(censored==0)

      failure event:  censored == 0
obs. time interval:  (0, unempdur]
exit on or before:  failure

.
. * Secion 13.2.2
. *-----
.
. sts list

      failure _d:  censored == 0
analysis time _t:  unempdur


```

| Time | Beg.<br>Total | Fail | Net<br>Lost | Survivor<br>Function | Std.<br>Error | [95% Conf. Int.] |
|------|---------------|------|-------------|----------------------|---------------|------------------|
| 1    | 2599          | 211  | 16          | 0.9188               | 0.0054        | 0.9076 0.9287    |
| 2    | 2372          | 326  | 32          | 0.7925               | 0.0080        | 0.7764 0.8077    |
| 3    | 2014          | 320  | 17          | 0.6666               | 0.0093        | 0.6480 0.6845    |
| 4    | 1677          | 183  | 13          | 0.5939               | 0.0097        | 0.5745 0.6126    |
| 5    | 1481          | 109  | 12          | 0.5502               | 0.0099        | 0.5306 0.5693    |
| 6    | 1360          | 155  | 10          | 0.4875               | 0.0099        | 0.4678 0.5068    |
| 7    | 1195          | 87   | 8           | 0.4520               | 0.0099        | 0.4324 0.4713    |
| 8    | 1100          | 79   | 8           | 0.4195               | 0.0099        | 0.4001 0.4388    |
| 9    | 1013          | 77   | 9           | 0.3876               | 0.0098        | 0.3685 0.4067    |
| 10   | 927           | 48   | 5           | 0.3676               | 0.0097        | 0.3486 0.3865    |
| 11   | 874           | 40   | 10          | 0.3507               | 0.0096        | 0.3320 0.3695    |
| 12   | 824           | 164  | 8           | 0.2809               | 0.0091        | 0.2632 0.2989    |
| 13   | 652           | 27   | 4           | 0.2693               | 0.0090        | 0.2518 0.2870    |
| 14   | 621           | 33   | 3           | 0.2550               | 0.0089        | 0.2378 0.2725    |
| 15   | 585           | 39   | 4           | 0.2380               | 0.0087        | 0.2212 0.2552    |
| 16   | 542           | 25   | 5           | 0.2270               | 0.0085        | 0.2105 0.2439    |
| 17   | 512           | 19   | 4           | 0.2186               | 0.0084        | 0.2023 0.2353    |
| 18   | 489           | 33   | 3           | 0.2038               | 0.0083        | 0.1879 0.2202    |
| 19   | 453           | 14   | 2           | 0.1975               | 0.0082        | 0.1818 0.2138    |
| 20   | 437           | 18   | 2           | 0.1894               | 0.0081        | 0.1739 0.2054    |
| 21   | 417           | 17   | 6           | 0.1817               | 0.0079        | 0.1664 0.1975    |
| 22   | 394           | 14   | 5           | 0.1752               | 0.0078        | 0.1601 0.1909    |

|     |     |    |   |        |        |        |        |
|-----|-----|----|---|--------|--------|--------|--------|
| 23  | 375 | 16 | 0 | 0.1677 | 0.0077 | 0.1529 | 0.1832 |
| 24  | 359 | 41 | 2 | 0.1486 | 0.0074 | 0.1344 | 0.1634 |
| 25  | 316 | 8  | 4 | 0.1448 | 0.0073 | 0.1308 | 0.1595 |
| 26  | 304 | 7  | 0 | 0.1415 | 0.0073 | 0.1276 | 0.1561 |
| 27  | 297 | 8  | 2 | 0.1377 | 0.0072 | 0.1239 | 0.1521 |
| 28  | 287 | 4  | 3 | 0.1358 | 0.0072 | 0.1221 | 0.1502 |
| 29  | 280 | 10 | 2 | 0.1309 | 0.0071 | 0.1174 | 0.1451 |
| 30  | 268 | 14 | 0 | 0.1241 | 0.0069 | 0.1109 | 0.1380 |
| 31  | 254 | 6  | 4 | 0.1211 | 0.0069 | 0.1081 | 0.1350 |
| 32  | 244 | 8  | 0 | 0.1172 | 0.0068 | 0.1043 | 0.1309 |
| 33  | 236 | 7  | 3 | 0.1137 | 0.0067 | 0.1010 | 0.1273 |
| 34  | 226 | 6  | 2 | 0.1107 | 0.0066 | 0.0981 | 0.1241 |
| 35  | 218 | 3  | 2 | 0.1092 | 0.0066 | 0.0966 | 0.1225 |
| 36  | 213 | 15 | 2 | 0.1015 | 0.0064 | 0.0893 | 0.1145 |
| 37  | 196 | 4  | 0 | 0.0994 | 0.0064 | 0.0873 | 0.1124 |
| 38  | 192 | 6  | 2 | 0.0963 | 0.0063 | 0.0844 | 0.1091 |
| 39  | 184 | 4  | 5 | 0.0942 | 0.0063 | 0.0824 | 0.1069 |
| 40  | 175 | 5  | 0 | 0.0915 | 0.0062 | 0.0798 | 0.1041 |
| 41  | 170 | 2  | 0 | 0.0904 | 0.0062 | 0.0788 | 0.1030 |
| 43  | 168 | 3  | 0 | 0.0888 | 0.0061 | 0.0773 | 0.1013 |
| 44  | 165 | 4  | 0 | 0.0867 | 0.0061 | 0.0752 | 0.0991 |
| 45  | 161 | 3  | 1 | 0.0850 | 0.0060 | 0.0737 | 0.0974 |
| 46  | 157 | 0  | 1 | 0.0850 | 0.0060 | 0.0737 | 0.0974 |
| 47  | 156 | 6  | 1 | 0.0818 | 0.0059 | 0.0706 | 0.0939 |
| 48  | 149 | 10 | 0 | 0.0763 | 0.0058 | 0.0654 | 0.0882 |
| 49  | 139 | 3  | 0 | 0.0746 | 0.0057 | 0.0639 | 0.0864 |
| 50  | 136 | 2  | 1 | 0.0735 | 0.0057 | 0.0629 | 0.0853 |
| 51  | 133 | 4  | 1 | 0.0713 | 0.0057 | 0.0608 | 0.0829 |
| 52  | 128 | 2  | 0 | 0.0702 | 0.0056 | 0.0597 | 0.0818 |
| 53  | 126 | 3  | 0 | 0.0685 | 0.0056 | 0.0582 | 0.0800 |
| 54  | 123 | 3  | 1 | 0.0669 | 0.0055 | 0.0566 | 0.0782 |
| 55  | 119 | 1  | 0 | 0.0663 | 0.0055 | 0.0561 | 0.0776 |
| 56  | 118 | 2  | 0 | 0.0652 | 0.0055 | 0.0550 | 0.0764 |
| 57  | 116 | 2  | 0 | 0.0641 | 0.0054 | 0.0540 | 0.0753 |
| 59  | 114 | 3  | 0 | 0.0624 | 0.0054 | 0.0524 | 0.0735 |
| 60  | 111 | 8  | 0 | 0.0579 | 0.0052 | 0.0482 | 0.0687 |
| 61  | 103 | 1  | 0 | 0.0573 | 0.0052 | 0.0477 | 0.0681 |
| 62  | 102 | 2  | 0 | 0.0562 | 0.0051 | 0.0467 | 0.0669 |
| 63  | 100 | 1  | 0 | 0.0556 | 0.0051 | 0.0462 | 0.0663 |
| 64  | 99  | 2  | 2 | 0.0545 | 0.0051 | 0.0451 | 0.0651 |
| 65  | 95  | 2  | 0 | 0.0534 | 0.0050 | 0.0441 | 0.0639 |
| 66  | 93  | 2  | 0 | 0.0522 | 0.0050 | 0.0430 | 0.0626 |
| 67  | 91  | 1  | 1 | 0.0516 | 0.0050 | 0.0425 | 0.0620 |
| 68  | 89  | 1  | 2 | 0.0511 | 0.0050 | 0.0420 | 0.0614 |
| 69  | 86  | 0  | 1 | 0.0511 | 0.0050 | 0.0420 | 0.0614 |
| 72  | 85  | 1  | 1 | 0.0505 | 0.0049 | 0.0414 | 0.0607 |
| 73  | 83  | 0  | 2 | 0.0505 | 0.0049 | 0.0414 | 0.0607 |
| 74  | 81  | 3  | 0 | 0.0486 | 0.0049 | 0.0397 | 0.0588 |
| 75  | 78  | 0  | 1 | 0.0486 | 0.0049 | 0.0397 | 0.0588 |
| 76  | 77  | 1  | 1 | 0.0480 | 0.0048 | 0.0391 | 0.0581 |
| 77  | 75  | 1  | 0 | 0.0473 | 0.0048 | 0.0385 | 0.0574 |
| 79  | 74  | 1  | 1 | 0.0467 | 0.0048 | 0.0379 | 0.0567 |
| 80  | 72  | 0  | 2 | 0.0467 | 0.0048 | 0.0379 | 0.0567 |
| 81  | 70  | 2  | 0 | 0.0453 | 0.0048 | 0.0367 | 0.0553 |
| 82  | 68  | 1  | 0 | 0.0447 | 0.0047 | 0.0361 | 0.0546 |
| 83  | 67  | 1  | 1 | 0.0440 | 0.0047 | 0.0354 | 0.0539 |
| 84  | 65  | 1  | 1 | 0.0433 | 0.0047 | 0.0348 | 0.0532 |
| 85  | 63  | 1  | 0 | 0.0426 | 0.0047 | 0.0342 | 0.0525 |
| 86  | 62  | 2  | 0 | 0.0413 | 0.0046 | 0.0329 | 0.0510 |
| 87  | 60  | 1  | 0 | 0.0406 | 0.0046 | 0.0323 | 0.0503 |
| 88  | 59  | 1  | 0 | 0.0399 | 0.0046 | 0.0316 | 0.0495 |
| 89  | 58  | 0  | 1 | 0.0399 | 0.0046 | 0.0316 | 0.0495 |
| 90  | 57  | 1  | 1 | 0.0392 | 0.0045 | 0.0310 | 0.0488 |
| 91  | 55  | 2  | 0 | 0.0378 | 0.0045 | 0.0297 | 0.0473 |
| 93  | 53  | 1  | 0 | 0.0371 | 0.0044 | 0.0290 | 0.0465 |
| 95  | 52  | 1  | 0 | 0.0363 | 0.0044 | 0.0284 | 0.0457 |
| 96  | 51  | 2  | 1 | 0.0349 | 0.0044 | 0.0271 | 0.0442 |
| 98  | 48  | 1  | 0 | 0.0342 | 0.0043 | 0.0264 | 0.0434 |
| 100 | 47  | 1  | 0 | 0.0335 | 0.0043 | 0.0258 | 0.0427 |
| 101 | 46  | 0  | 1 | 0.0335 | 0.0043 | 0.0258 | 0.0427 |
| 103 | 45  | 1  | 0 | 0.0327 | 0.0043 | 0.0251 | 0.0419 |
| 104 | 44  | 1  | 0 | 0.0320 | 0.0042 | 0.0244 | 0.0411 |
| 105 | 43  | 2  | 1 | 0.0305 | 0.0042 | 0.0231 | 0.0395 |

|     |    |   |   |        |        |        |        |
|-----|----|---|---|--------|--------|--------|--------|
| 106 | 40 | 1 | 1 | 0.0297 | 0.0041 | 0.0224 | 0.0386 |
| 108 | 38 | 2 | 0 | 0.0282 | 0.0041 | 0.0210 | 0.0369 |
| 110 | 36 | 1 | 0 | 0.0274 | 0.0040 | 0.0203 | 0.0361 |
| 111 | 35 | 1 | 0 | 0.0266 | 0.0040 | 0.0196 | 0.0353 |
| 114 | 34 | 1 | 1 | 0.0258 | 0.0039 | 0.0189 | 0.0344 |
| 118 | 32 | 0 | 1 | 0.0258 | 0.0039 | 0.0189 | 0.0344 |
| 121 | 31 | 0 | 1 | 0.0258 | 0.0039 | 0.0189 | 0.0344 |
| 122 | 30 | 0 | 1 | 0.0258 | 0.0039 | 0.0189 | 0.0344 |
| 123 | 29 | 0 | 1 | 0.0258 | 0.0039 | 0.0189 | 0.0344 |
| 126 | 28 | 2 | 1 | 0.0240 | 0.0039 | 0.0172 | 0.0325 |
| 128 | 25 | 1 | 0 | 0.0230 | 0.0038 | 0.0164 | 0.0315 |
| 129 | 24 | 0 | 1 | 0.0230 | 0.0038 | 0.0164 | 0.0315 |
| 133 | 23 | 0 | 2 | 0.0230 | 0.0038 | 0.0164 | 0.0315 |
| 139 | 21 | 0 | 1 | 0.0230 | 0.0038 | 0.0164 | 0.0315 |
| 144 | 20 | 1 | 0 | 0.0219 | 0.0038 | 0.0153 | 0.0303 |
| 147 | 19 | 1 | 0 | 0.0207 | 0.0038 | 0.0142 | 0.0291 |
| 149 | 18 | 1 | 1 | 0.0196 | 0.0037 | 0.0132 | 0.0280 |
| 159 | 16 | 0 | 1 | 0.0196 | 0.0037 | 0.0132 | 0.0280 |
| 160 | 15 | 0 | 1 | 0.0196 | 0.0037 | 0.0132 | 0.0280 |
| 161 | 14 | 0 | 1 | 0.0196 | 0.0037 | 0.0132 | 0.0280 |
| 163 | 13 | 1 | 0 | 0.0181 | 0.0037 | 0.0118 | 0.0266 |
| 175 | 12 | 1 | 0 | 0.0166 | 0.0037 | 0.0104 | 0.0251 |
| 183 | 11 | 0 | 1 | 0.0166 | 0.0037 | 0.0104 | 0.0251 |
| 198 | 10 | 1 | 0 | 0.0149 | 0.0037 | 0.0089 | 0.0236 |
| 248 | 9  | 1 | 0 | 0.0132 | 0.0036 | 0.0075 | 0.0220 |
| 255 | 8  | 1 | 0 | 0.0116 | 0.0035 | 0.0061 | 0.0203 |
| 279 | 7  | 1 | 0 | 0.0099 | 0.0034 | 0.0048 | 0.0185 |
| 301 | 6  | 1 | 0 | 0.0083 | 0.0032 | 0.0036 | 0.0167 |
| 304 | 5  | 0 | 1 | 0.0083 | 0.0032 | 0.0036 | 0.0167 |
| 371 | 4  | 1 | 0 | 0.0062 | 0.0030 | 0.0022 | 0.0147 |
| 397 | 3  | 0 | 1 | 0.0062 | 0.0030 | 0.0022 | 0.0147 |
| 408 | 2  | 1 | 0 | 0.0031 | 0.0027 | 0.0004 | 0.0133 |
| 504 | 1  | 1 | 0 | 0.0000 | .      | .      | .      |

```
. sts graph
```

```
    failure _d: censored == 0
analysis time _t: unempdur
```

```
. sts graph, saving(surv1, replace) scheme(s2mono)
```

```
    failure _d: censored == 0
analysis time _t: unempdur
(file surv1.gph saved)
```

```
. sts graph, failure saving(faill1, replace) scheme(s2mono)
```

```
    failure _d: censored == 0
analysis time _t: unempdur
(file faill1.gph saved)
```

```
. sts graph, cumhaz saving(cumhaz1, replace) scheme(s2mono)
```

```
    failure _d: censored == 0
analysis time _t: unempdur
(file cumhaz1.gph saved)
```

```
. sts graph, hazard saving(haz1, replace) scheme(s2mono)
```

```
    failure _d: censored == 0
analysis time _t: unempdur
(file haz1.gph saved)
```

```
.
. ltable unempdur
```

| Interval | Beg.<br>Total | Deaths | Lost | Survival | Std.<br>Error | [95% Conf. Int.] |        |        |
|----------|---------------|--------|------|----------|---------------|------------------|--------|--------|
| 0        | 1             | 2687   | 88   | 0        | 0.9672        | 0.0034           | 0.9598 | 0.9733 |
| 1        | 2             | 2599   | 227  | 0        | 0.8828        | 0.0062           | 0.8700 | 0.8944 |
| 2        | 3             | 2372   | 358  | 0        | 0.7495        | 0.0084           | 0.7327 | 0.7655 |

|    |    |      |     |   |        |        |        |        |
|----|----|------|-----|---|--------|--------|--------|--------|
| 3  | 4  | 2014 | 337 | 0 | 0.6241 | 0.0093 | 0.6055 | 0.6421 |
| 4  | 5  | 1677 | 196 | 0 | 0.5512 | 0.0096 | 0.5322 | 0.5698 |
| 5  | 6  | 1481 | 121 | 0 | 0.5061 | 0.0096 | 0.4871 | 0.5249 |
| 6  | 7  | 1360 | 165 | 0 | 0.4447 | 0.0096 | 0.4259 | 0.4634 |
| 7  | 8  | 1195 | 95  | 0 | 0.4094 | 0.0095 | 0.3907 | 0.4279 |
| 8  | 9  | 1100 | 87  | 0 | 0.3770 | 0.0093 | 0.3587 | 0.3953 |
| 9  | 10 | 1013 | 86  | 0 | 0.3450 | 0.0092 | 0.3271 | 0.3630 |
| 10 | 11 | 927  | 53  | 0 | 0.3253 | 0.0090 | 0.3076 | 0.3430 |
| 11 | 12 | 874  | 50  | 0 | 0.3067 | 0.0089 | 0.2893 | 0.3242 |
| 12 | 13 | 824  | 172 | 0 | 0.2426 | 0.0083 | 0.2266 | 0.2590 |
| 13 | 14 | 652  | 31  | 0 | 0.2311 | 0.0081 | 0.2154 | 0.2472 |
| 14 | 15 | 621  | 36  | 0 | 0.2177 | 0.0080 | 0.2023 | 0.2335 |
| 15 | 16 | 585  | 43  | 0 | 0.2017 | 0.0077 | 0.1868 | 0.2171 |
| 16 | 17 | 542  | 30  | 0 | 0.1905 | 0.0076 | 0.1759 | 0.2056 |
| 17 | 18 | 512  | 23  | 0 | 0.1820 | 0.0074 | 0.1676 | 0.1968 |
| 18 | 19 | 489  | 36  | 0 | 0.1686 | 0.0072 | 0.1547 | 0.1830 |
| 19 | 20 | 453  | 16  | 0 | 0.1626 | 0.0071 | 0.1490 | 0.1769 |
| 20 | 21 | 437  | 20  | 0 | 0.1552 | 0.0070 | 0.1418 | 0.1692 |
| 21 | 22 | 417  | 23  | 0 | 0.1466 | 0.0068 | 0.1336 | 0.1603 |
| 22 | 23 | 394  | 19  | 0 | 0.1396 | 0.0067 | 0.1268 | 0.1530 |
| 23 | 24 | 375  | 16  | 0 | 0.1336 | 0.0066 | 0.1211 | 0.1468 |
| 24 | 25 | 359  | 43  | 0 | 0.1176 | 0.0062 | 0.1058 | 0.1301 |
| 25 | 26 | 316  | 12  | 0 | 0.1131 | 0.0061 | 0.1015 | 0.1255 |
| 26 | 27 | 304  | 7   | 0 | 0.1105 | 0.0060 | 0.0990 | 0.1227 |
| 27 | 28 | 297  | 10  | 0 | 0.1068 | 0.0060 | 0.0955 | 0.1188 |
| 28 | 29 | 287  | 7   | 0 | 0.1042 | 0.0059 | 0.0930 | 0.1161 |
| 29 | 30 | 280  | 12  | 0 | 0.0997 | 0.0058 | 0.0888 | 0.1114 |
| 30 | 31 | 268  | 14  | 0 | 0.0945 | 0.0056 | 0.0838 | 0.1060 |
| 31 | 32 | 254  | 10  | 0 | 0.0908 | 0.0055 | 0.0803 | 0.1020 |
| 32 | 33 | 244  | 8   | 0 | 0.0878 | 0.0055 | 0.0775 | 0.0989 |
| 33 | 34 | 236  | 10  | 0 | 0.0841 | 0.0054 | 0.0740 | 0.0950 |
| 34 | 35 | 226  | 8   | 0 | 0.0811 | 0.0053 | 0.0712 | 0.0918 |
| 35 | 36 | 218  | 5   | 0 | 0.0793 | 0.0052 | 0.0695 | 0.0899 |
| 36 | 37 | 213  | 17  | 0 | 0.0729 | 0.0050 | 0.0635 | 0.0832 |
| 37 | 38 | 196  | 4   | 0 | 0.0715 | 0.0050 | 0.0621 | 0.0816 |
| 38 | 39 | 192  | 8   | 0 | 0.0685 | 0.0049 | 0.0593 | 0.0784 |
| 39 | 40 | 184  | 9   | 0 | 0.0651 | 0.0048 | 0.0562 | 0.0749 |
| 40 | 41 | 175  | 5   | 0 | 0.0633 | 0.0047 | 0.0545 | 0.0729 |
| 41 | 42 | 170  | 2   | 0 | 0.0625 | 0.0047 | 0.0538 | 0.0721 |
| 43 | 44 | 168  | 3   | 0 | 0.0614 | 0.0046 | 0.0528 | 0.0709 |
| 44 | 45 | 165  | 4   | 0 | 0.0599 | 0.0046 | 0.0514 | 0.0693 |
| 45 | 46 | 161  | 4   | 0 | 0.0584 | 0.0045 | 0.0500 | 0.0677 |
| 46 | 47 | 157  | 1   | 0 | 0.0581 | 0.0045 | 0.0496 | 0.0673 |
| 47 | 48 | 156  | 7   | 0 | 0.0555 | 0.0044 | 0.0472 | 0.0645 |
| 48 | 49 | 149  | 10  | 0 | 0.0517 | 0.0043 | 0.0438 | 0.0606 |
| 49 | 50 | 139  | 3   | 0 | 0.0506 | 0.0042 | 0.0428 | 0.0594 |
| 50 | 51 | 136  | 3   | 0 | 0.0495 | 0.0042 | 0.0417 | 0.0582 |
| 51 | 52 | 133  | 5   | 0 | 0.0476 | 0.0041 | 0.0400 | 0.0562 |
| 52 | 53 | 128  | 2   | 0 | 0.0469 | 0.0041 | 0.0394 | 0.0553 |
| 53 | 54 | 126  | 3   | 0 | 0.0458 | 0.0040 | 0.0383 | 0.0541 |
| 54 | 55 | 123  | 4   | 0 | 0.0443 | 0.0040 | 0.0370 | 0.0525 |
| 55 | 56 | 119  | 1   | 0 | 0.0439 | 0.0040 | 0.0366 | 0.0521 |
| 56 | 57 | 118  | 2   | 0 | 0.0432 | 0.0039 | 0.0359 | 0.0513 |
| 57 | 58 | 116  | 2   | 0 | 0.0424 | 0.0039 | 0.0353 | 0.0505 |
| 59 | 60 | 114  | 3   | 0 | 0.0413 | 0.0038 | 0.0342 | 0.0493 |
| 60 | 61 | 111  | 8   | 0 | 0.0383 | 0.0037 | 0.0315 | 0.0461 |
| 61 | 62 | 103  | 1   | 0 | 0.0380 | 0.0037 | 0.0312 | 0.0457 |
| 62 | 63 | 102  | 2   | 0 | 0.0372 | 0.0037 | 0.0305 | 0.0449 |
| 63 | 64 | 100  | 1   | 0 | 0.0368 | 0.0036 | 0.0302 | 0.0445 |
| 64 | 65 | 99   | 4   | 0 | 0.0354 | 0.0036 | 0.0288 | 0.0428 |
| 65 | 66 | 95   | 2   | 0 | 0.0346 | 0.0035 | 0.0282 | 0.0420 |
| 66 | 67 | 93   | 2   | 0 | 0.0339 | 0.0035 | 0.0275 | 0.0412 |
| 67 | 68 | 91   | 2   | 0 | 0.0331 | 0.0035 | 0.0268 | 0.0404 |
| 68 | 69 | 89   | 3   | 0 | 0.0320 | 0.0034 | 0.0258 | 0.0392 |
| 69 | 70 | 86   | 1   | 0 | 0.0316 | 0.0034 | 0.0255 | 0.0388 |
| 72 | 73 | 85   | 2   | 0 | 0.0309 | 0.0033 | 0.0248 | 0.0379 |
| 73 | 74 | 83   | 2   | 0 | 0.0301 | 0.0033 | 0.0242 | 0.0371 |
| 74 | 75 | 81   | 3   | 0 | 0.0290 | 0.0032 | 0.0232 | 0.0359 |
| 75 | 76 | 78   | 1   | 0 | 0.0287 | 0.0032 | 0.0228 | 0.0355 |
| 76 | 77 | 77   | 2   | 0 | 0.0279 | 0.0032 | 0.0222 | 0.0347 |
| 77 | 78 | 75   | 1   | 0 | 0.0275 | 0.0032 | 0.0218 | 0.0342 |
| 79 | 80 | 74   | 2   | 0 | 0.0268 | 0.0031 | 0.0212 | 0.0334 |
| 80 | 81 | 72   | 2   | 0 | 0.0261 | 0.0031 | 0.0205 | 0.0326 |

|     |     |    |   |   |        |        |        |        |
|-----|-----|----|---|---|--------|--------|--------|--------|
| 81  | 82  | 70 | 2 | 0 | 0.0253 | 0.0030 | 0.0199 | 0.0318 |
| 82  | 83  | 68 | 1 | 0 | 0.0249 | 0.0030 | 0.0195 | 0.0314 |
| 83  | 84  | 67 | 2 | 0 | 0.0242 | 0.0030 | 0.0189 | 0.0305 |
| 84  | 85  | 65 | 2 | 0 | 0.0234 | 0.0029 | 0.0182 | 0.0297 |
| 85  | 86  | 63 | 1 | 0 | 0.0231 | 0.0029 | 0.0179 | 0.0293 |
| 86  | 87  | 62 | 2 | 0 | 0.0223 | 0.0029 | 0.0172 | 0.0284 |
| 87  | 88  | 60 | 1 | 0 | 0.0220 | 0.0028 | 0.0169 | 0.0280 |
| 88  | 89  | 59 | 1 | 0 | 0.0216 | 0.0028 | 0.0166 | 0.0276 |
| 89  | 90  | 58 | 1 | 0 | 0.0212 | 0.0028 | 0.0163 | 0.0272 |
| 90  | 91  | 57 | 2 | 0 | 0.0205 | 0.0027 | 0.0156 | 0.0264 |
| 91  | 92  | 55 | 2 | 0 | 0.0197 | 0.0027 | 0.0150 | 0.0255 |
| 93  | 94  | 53 | 1 | 0 | 0.0194 | 0.0027 | 0.0146 | 0.0251 |
| 95  | 96  | 52 | 1 | 0 | 0.0190 | 0.0026 | 0.0143 | 0.0247 |
| 96  | 97  | 51 | 3 | 0 | 0.0179 | 0.0026 | 0.0134 | 0.0234 |
| 98  | 99  | 48 | 1 | 0 | 0.0175 | 0.0025 | 0.0130 | 0.0230 |
| 100 | 101 | 47 | 1 | 0 | 0.0171 | 0.0025 | 0.0127 | 0.0226 |
| 101 | 102 | 46 | 1 | 0 | 0.0167 | 0.0025 | 0.0124 | 0.0222 |
| 103 | 104 | 45 | 1 | 0 | 0.0164 | 0.0024 | 0.0121 | 0.0217 |
| 104 | 105 | 44 | 1 | 0 | 0.0160 | 0.0024 | 0.0118 | 0.0213 |
| 105 | 106 | 43 | 3 | 0 | 0.0149 | 0.0023 | 0.0108 | 0.0200 |
| 106 | 107 | 40 | 2 | 0 | 0.0141 | 0.0023 | 0.0102 | 0.0192 |
| 108 | 109 | 38 | 2 | 0 | 0.0134 | 0.0022 | 0.0096 | 0.0183 |
| 110 | 111 | 36 | 1 | 0 | 0.0130 | 0.0022 | 0.0093 | 0.0179 |
| 111 | 112 | 35 | 1 | 0 | 0.0127 | 0.0022 | 0.0089 | 0.0175 |
| 114 | 115 | 34 | 2 | 0 | 0.0119 | 0.0021 | 0.0083 | 0.0166 |
| 118 | 119 | 32 | 1 | 0 | 0.0115 | 0.0021 | 0.0080 | 0.0162 |
| 121 | 122 | 31 | 1 | 0 | 0.0112 | 0.0020 | 0.0077 | 0.0157 |
| 122 | 123 | 30 | 1 | 0 | 0.0108 | 0.0020 | 0.0074 | 0.0153 |
| 123 | 124 | 29 | 1 | 0 | 0.0104 | 0.0020 | 0.0071 | 0.0148 |
| 126 | 127 | 28 | 3 | 0 | 0.0093 | 0.0019 | 0.0062 | 0.0135 |
| 128 | 129 | 25 | 1 | 0 | 0.0089 | 0.0018 | 0.0059 | 0.0131 |
| 129 | 130 | 24 | 1 | 0 | 0.0086 | 0.0018 | 0.0056 | 0.0126 |
| 133 | 134 | 23 | 2 | 0 | 0.0078 | 0.0017 | 0.0050 | 0.0118 |
| 139 | 140 | 21 | 1 | 0 | 0.0074 | 0.0017 | 0.0047 | 0.0113 |
| 144 | 145 | 20 | 1 | 0 | 0.0071 | 0.0016 | 0.0044 | 0.0109 |
| 147 | 148 | 19 | 1 | 0 | 0.0067 | 0.0016 | 0.0041 | 0.0104 |
| 149 | 150 | 18 | 2 | 0 | 0.0060 | 0.0015 | 0.0036 | 0.0095 |
| 159 | 160 | 16 | 1 | 0 | 0.0056 | 0.0014 | 0.0033 | 0.0090 |
| 160 | 161 | 15 | 1 | 0 | 0.0052 | 0.0014 | 0.0030 | 0.0086 |
| 161 | 162 | 14 | 1 | 0 | 0.0048 | 0.0013 | 0.0027 | 0.0081 |
| 163 | 164 | 13 | 1 | 0 | 0.0045 | 0.0013 | 0.0025 | 0.0076 |
| 175 | 176 | 12 | 1 | 0 | 0.0041 | 0.0012 | 0.0022 | 0.0072 |
| 183 | 184 | 11 | 1 | 0 | 0.0037 | 0.0012 | 0.0019 | 0.0067 |
| 198 | 199 | 10 | 1 | 0 | 0.0033 | 0.0011 | 0.0017 | 0.0062 |
| 248 | 249 | 9  | 1 | 0 | 0.0030 | 0.0011 | 0.0014 | 0.0057 |
| 255 | 256 | 8  | 1 | 0 | 0.0026 | 0.0010 | 0.0012 | 0.0052 |
| 279 | 280 | 7  | 1 | 0 | 0.0022 | 0.0009 | 0.0010 | 0.0047 |
| 301 | 302 | 6  | 1 | 0 | 0.0019 | 0.0008 | 0.0007 | 0.0042 |
| 304 | 305 | 5  | 1 | 0 | 0.0015 | 0.0007 | 0.0005 | 0.0037 |
| 371 | 372 | 4  | 1 | 0 | 0.0011 | 0.0006 | 0.0003 | 0.0032 |
| 397 | 398 | 3  | 1 | 0 | 0.0007 | 0.0005 | 0.0002 | 0.0026 |
| 408 | 409 | 2  | 1 | 0 | 0.0004 | 0.0004 | 0.0000 | 0.0021 |
| 504 | 505 | 1  | 1 | 0 | 0.0000 | .      | .      | .      |

```

.
. * Secion 13.2.3
. *-----
.
. streg age female white north midlands stheast wales scotland, ///
>      distribution(weibull)

      failure _d:  censored == 0
      analysis time _t:  unempdur

Fitting constant-only model:

Iteration 0:  log likelihood = -2578.099
Iteration 1:  log likelihood = -2499.6539
Iteration 2:  log likelihood = -2499.6204
Iteration 3:  log likelihood = -2499.6204

Fitting full model:

```

```

Iteration 0: log likelihood = -2499.6204
Iteration 1: log likelihood = -2481.1111
Iteration 2: log likelihood = -2480.9469
Iteration 3: log likelihood = -2480.9468

```

Weibull regression -- log relative-hazard form

```

No. of subjects =      1518      Number of obs   =      1518
No. of failures =      1391
Time at risk    =      18355

Log likelihood   =   -2480.9468      LR chi2(8)      =      37.35
                                      Prob > chi2      =      0.0000

```

| _t       | Haz. Ratio | Std. Err. | z      | P> z  | [95% Conf. Interval] |           |
|----------|------------|-----------|--------|-------|----------------------|-----------|
| age      | .9992463   | .0004714  | -1.60  | 0.110 | .9983227             | 1.000171  |
| female   | .9967321   | .0545715  | -0.06  | 0.952 | .8953128             | 1.10964   |
| white    | 1.413103   | .2031441  | 2.41   | 0.016 | 1.066123             | 1.873011  |
| north    | .7468838   | .0775322  | -2.81  | 0.005 | .6093852             | .9154069  |
| midlands | .7286552   | .0809123  | -2.85  | 0.004 | .5861407             | .9058207  |
| stheast  | 1.03511    | .1062957  | 0.34   | 0.737 | .8464013             | 1.265892  |
| wales    | .8521687   | .119173   | -1.14  | 0.253 | .6478699             | 1.120891  |
| scotland | .9809616   | .1208389  | -0.16  | 0.876 | .7705441             | 1.248839  |
| _cons    | .1137205   | .018722   | -13.21 | 0.000 | .0823576             | .1570268  |
| /ln_p    | -.1969252  | .0187625  | -10.50 | 0.000 | -.233699             | -.1601514 |
| p        | .8212521   | .0154087  |        |       | .7916001             | .8520148  |
| 1/p      | 1.217653   | .0228462  |        |       | 1.173689             | 1.263264  |

```

. stcurve, hazard saving(haz2, replace)
(file haz2.gph saved)

.
. stcurve, at1(female=1) at2(female=0) cumhaz saving(cumhaz3, replace) ///
> scheme(s2mono)
(file cumhaz3.gph saved)

. stcurve, at1(female=1) at2(female=0) survival saving(surv3, replace) ///
> scheme(s2mono)
(file surv3.gph saved)

. stcurve, at1(female=1) at2(female=0) hazard saving(haz3, replace) ///
> scheme(s2mono)
(file haz3.gph saved)

.
. stcurve, at1(white=1) at2(white=0) cumhaz saving(cumhaz4, replace) ///
> scheme(s2mono)
(file cumhaz4.gph saved)

. stcurve, at1(white=1) at2(white=0) survival saving(surv4, replace) ///
> scheme(s2mono)
(file surv4.gph saved)

. stcurve, at1(white=1) at2(white=0) hazard saving(haz4, replace) scheme(s2mono)
(file haz4.gph saved)

.
. predict predHaz, hazard
(1169 missing values generated)

. predict survMd, median time
(1169 missing values generated)

.
. list unempdur _t survMd if female==1 & age==30 & white==1

```

```

+-----+
| unempdur _t survMd |

```



|       |    |    |          |
|-------|----|----|----------|
| 321.  | 36 | 36 | 5.867148 |
| 338.  | 5  | 5  | 5.867148 |
| 762.  | 1  | 1  | 5.867148 |
| 1773. | 5  | 5  | 8.729897 |
| 2048. | 10 | 10 | 8.729897 |
| 2083. | 4  | 4  | 8.729897 |
| 2502. | 5  | 5  | 5.867148 |

```
. list unempdur _t survMd if female==1 & age==30 & white==1 & north==1
```

|       |    |    |          |
|-------|----|----|----------|
| 1773. | 5  | 5  | 8.729897 |
| 2048. | 10 | 10 | 8.729897 |
| 2083. | 4  | 4  | 8.729897 |

```
. list unempdur _t survMd if female==1 & age==30 & white==1 & stheast==1
```

|       |    |    |          |
|-------|----|----|----------|
| 321.  | 36 | 36 | 5.867148 |
| 338.  | 5  | 5  | 5.867148 |
| 762.  | 1  | 1  | 5.867148 |
| 2502. | 5  | 5  | 5.867148 |

```
. summarize survMd if female==1 & age==30 & white==1
```

| Variable | Obs | Mean    | Std. Dev. | Min      | Max      |
|----------|-----|---------|-----------|----------|----------|
| survMd   | 7   | 7.09404 | 1.530204  | 5.867148 | 8.729897 |

```
. list unempdur _t survMd if female==0 & age==30 & white==1
```

|       |    |    |          |
|-------|----|----|----------|
| 434.  | 3  | 3  | 5.84381  |
| 1074. | 9  | 9  | 8.960757 |
| 1079. | 7  | 7  | 8.960757 |
| 1264. | 21 | 21 | 8.960757 |
| 1673. | 2  | 2  | 8.695171 |
| 1677. | 1  | 1  | 8.695171 |
| 2251. | 1  | 1  | 6.238917 |
| 2473. | 4  | 4  | 6.238917 |

```
. summarize survMd if female==0 & age==30 & white==1
```

| Variable | Obs | Mean     | Std. Dev. | Min     | Max      |
|----------|-----|----------|-----------|---------|----------|
| survMd   | 8   | 7.824282 | 1.431316  | 5.84381 | 8.960757 |

```
. * Secion 13.2.4
```

```
. streg age female white, distribution(weibull) frailty(gamma)
```

```
    failure _d:  censored == 0
analysis time _t:  unempdur
```

Fitting Weibull model:

Fitting constant-only model:

```
Iteration 0: log likelihood = -2370.9808
Iteration 1: log likelihood = -2287.0636
Iteration 2: log likelihood = -2277.0558
Iteration 3: log likelihood = -2276.8787
Iteration 4: log likelihood = -2276.8785
```

Fitting full model:

```
Iteration 0: log likelihood = -2365.1358
Iteration 1: log likelihood = -2278.6773
Iteration 2: log likelihood = -2276.0481
Iteration 3: log likelihood = -2276.0266
Iteration 4: log likelihood = -2276.0266
```

Weibull regression -- log relative-hazard form  
Gamma frailty

```
No. of subjects = 1530 Number of obs = 1530
No. of failures = 1402
Time at risk = 18503
Log likelihood = -2276.0266 LR chi2(3) = 1.70
Prob > chi2 = 0.6361
```

| _t      | Haz. Ratio | Std. Err. | z      | P> z  | [95% Conf. Interval] |          |
|---------|------------|-----------|--------|-------|----------------------|----------|
| age     | .9999022   | .0012408  | -0.08  | 0.937 | .9974733             | 1.002337 |
| female  | 1.112312   | .1474802  | 0.80   | 0.422 | .8577618             | 1.442402 |
| white   | 1.421474   | .4703961  | 1.06   | 0.288 | .7431189             | 2.719066 |
| _cons   | .0262451   | .0092419  | -10.34 | 0.000 | .0131615             | .0523347 |
| /ln_p   | .8643937   | .0660156  | 13.09  | 0.000 | .7350054             | .993782  |
| /ln_the | .9727421   | .1088915  | 8.93   | 0.000 | .7593187             | 1.186166 |
| p       | 2.373567   | .1566925  |        |       | 2.085493             | 2.701432 |
| 1/p     | .4213069   | .0278128  |        |       | .3701741             | .4795029 |
| theta   | 2.645188   | .2880385  |        |       | 2.13682              | 3.274501 |

Likelihood-ratio test of theta=0: chibar2(01) = 484.86 Prob>=chibar2 = 0.000

```
. streg age female white north midlands stheast wales scotland, ///
> distribution(weibull) frailty(gamma)

failure _d: censored == 0
analysis time _t: unempdur
```

Fitting Weibull model:

Fitting constant-only model:

```
Iteration 0: log likelihood = -2350.9182
Iteration 1: log likelihood = -2266.9769
Iteration 2: log likelihood = -2257.5748
Iteration 3: log likelihood = -2257.5218
Iteration 4: log likelihood = -2257.5218
```

Fitting full model:

```
Iteration 0: log likelihood = -2338.1931
Iteration 1: log likelihood = -2252.4494
Iteration 2: log likelihood = -2249.6643
Iteration 3: log likelihood = -2249.625
Iteration 4: log likelihood = -2249.625
```

Weibull regression -- log relative-hazard form  
Gamma frailty

```
No. of subjects = 1518 Number of obs = 1518
```

```

No. of failures =      1391
Time at risk   =      18355

Log likelihood =      -2249.625

LR chi2(8) =      15.79
Prob > chi2 =      0.0454

```

| _t       | Haz. Ratio | Std. Err. | z     | P> z  | [95% Conf. Interval] |          |
|----------|------------|-----------|-------|-------|----------------------|----------|
| age      | .9997252   | .0012321  | -0.22 | 0.824 | .9973132             | 1.002143 |
| female   | 1.105371   | .145839   | 0.76  | 0.448 | .8535                | 1.431571 |
| white    | 1.425484   | .4656287  | 1.09  | 0.278 | .7514857             | 2.703983 |
| north    | .778096    | .1831065  | -1.07 | 0.286 | .4905948             | 1.23408  |
| midlands | .6871682   | .1760256  | -1.46 | 0.143 | .4159284             | 1.135292 |
| stheast  | 1.267106   | .2987059  | 1.00  | 0.315 | .7982733             | 2.011287 |
| wales    | .7596392   | .258767   | -0.81 | 0.420 | .389628              | 1.481032 |
| scotland | 1.175706   | .3433751  | 0.55  | 0.579 | .6632819             | 2.084009 |
| _cons    | .0277925   | .0107252  | -9.28 | 0.000 | .0130451             | .0592118 |
| /ln_p    | .8590572   | .0661397  | 12.99 | 0.000 | .7294257             | .9886887 |
| /ln_the  | .9524716   | .1101693  | 8.65  | 0.000 | .7365437             | 1.1684   |
| p        | 2.360934   | .1561515  |       |       | 2.073889             | 2.687708 |
| 1/p      | .4235612   | .0280142  |       |       | .3720643             | .4821858 |
| theta    | 2.592108   | .2855709  |       |       | 2.088704             | 3.21684  |

```

Likelihood-ratio test of theta=0: chibar2(01) = 462.64 Prob>=chibar2 = 0.000

```

```

.
.
. * Secion 13.2.5
. *-----
.
. sts generate baselinesurv1=s
.
. stcox, estimate

      failure _d: censored == 0
      analysis time _t: unempdur

```

```

Iteration 0: log likelihood = -16304.351
Refining estimates:
Iteration 0: log likelihood = -16304.351

```

```

Cox regression -- Breslow method for ties

```

```

No. of subjects =      2599
No. of failures =      2335
Time at risk   =      36074

Log likelihood =      -16304.351

Number of obs =      2599

LR chi2(0) =      0.00
Prob > chi2 =      .

```

| _t | Haz. Ratio | Std. Err. | z | P> z | [95% Conf. Interval] |  |
|----|------------|-----------|---|------|----------------------|--|
|----|------------|-----------|---|------|----------------------|--|

```

. predict baselinesurv2, basesurv
(88 missing values generated)

```

```

. list baselinesurv1 baselinesurv2 in 1/10

```

|    | baselin~1 | baseli~2 |
|----|-----------|----------|
| 1. | .17521803 | .175218  |
| 2. | .19753083 | .1975308 |
| 3. | .55016064 | .5501606 |
| 4. | .66661169 | .6666117 |
| 5. | .28092439 | .2809244 |
| 6. | .79253598 | .792536  |
| 7. | .14858489 | .1485849 |
| 8. | .28092439 | .2809244 |
| 9. | .66661169 | .6666117 |

```

10. | .59386874   .5938687 |
    +-----+

.
. stcox age female white north midlands stheast wales scotland, ///
>      basesurv(baseline1)

      failure _d:  censored == 0
      analysis time _t:  unempdur

Iteration 0:   log likelihood = -8958.1018
Iteration 1:   log likelihood = -8948.9096
Iteration 2:   log likelihood = -8948.8935
Iteration 3:   log likelihood = -8948.8935
Refining estimates:
Iteration 0:   log likelihood = -8948.8935

Cox regression -- Breslow method for ties

No. of subjects =          1518                Number of obs   =          1518
No. of failures =          1391
Time at risk    =          18355

LR chi2(8)      =          18.42
Prob > chi2     =          0.0183
Log likelihood   =   -8948.8935

-----+-----
      _t | Haz. Ratio   Std. Err.      z    P>|z|     [95% Conf. Interval]
-----+-----
      age |   .999646   .0004755    -0.74   0.457     .9987146   1.000578
    female |   1.055755   .0577613     0.99   0.321     .9484036   1.175258
      white |   1.28588    .1839285     1.76   0.079     .9715095   1.701978
      north |   .8401644   .086903    -1.68   0.092     .6859929   1.028985
midlands   |   .8131374   .0898658    -1.87   0.061     .6547739   1.009803
    stheast |   1.042128   .10702     0.40   0.688     .852134   1.274483
      wales |   .9025372   .1260886    -0.73   0.463     .6863542   1.186812
    scotland |   .9852311   .1213103    -0.12   0.904     .7739818   1.254139
-----+-----

. stcox age white north midlands stheast wales scotland, basesurv(baseline2) ///
>      strata(female) nolog

      failure _d:  censored == 0
      analysis time _t:  unempdur

Stratified Cox regr. -- Breslow method for ties

No. of subjects =          1518                Number of obs   =          1518
No. of failures =          1391
Time at risk    =          18355

LR chi2(7)      =          17.21
Prob > chi2     =          0.0161
Log likelihood   =   -8005.3278

-----+-----
      _t | Haz. Ratio   Std. Err.      z    P>|z|     [95% Conf. Interval]
-----+-----
      age |   .9996126   .0004765    -0.81   0.416     .9986793   1.000547
      white |   1.29252    .1854231     1.79   0.074     .9757194   1.71218
      north |   .836367    .0865662    -1.73   0.084     .6828028   1.024468
midlands   |   .8118454   .0897863    -1.88   0.059     .6536336   1.008352
    stheast |   1.038813   .106732     0.37   0.711     .84934    1.270555
      wales |   .8994849   .1257549    -0.76   0.449     .683895   1.183037
    scotland |   .9792639   .1206687    -0.17   0.865     .7691505   1.246775
-----+-----
                                             Stratified by female

.
. label var _t "time"

. twoway line baseline2 _t if female==1 & e(sample) & _t<30, sort || ///
>      line baseline2 _t if female==0 & e(sample) & _t<30, sort || ///
>      line baseline1 _t if female!=. & e(sample) & _t<30, sort ///
>      legend(label(1 women) label(2 men) label(3 all)) scheme(s2mono)

```

```

.
.
. * Section 13.3
. *-----
.
. use duration_discrete, clear

.
. generate logdur=log(monthid)

. logit spellended logdur age female white north midlands ///
>      stheast wales scotland

Iteration 0:   log likelihood = -5008.4638
Iteration 1:   log likelihood = -4783.3483
Iteration 2:   log likelihood = -4768.2073
Iteration 3:   log likelihood =  -4768.17
Iteration 4:   log likelihood =  -4768.17

Logistic regression               Number of obs   =       18396
                                LR chi2(9)        =       480.59
                                Prob > chi2        =       0.0000
Log likelihood =  -4768.17        Pseudo R2      =       0.0480

```

| spellended | Coef.     | Std. Err. | z      | P> z  | [95% Conf. Interval] |           |
|------------|-----------|-----------|--------|-------|----------------------|-----------|
| logdur     | -.4249297 | .0219809  | -19.33 | 0.000 | -.4680115            | -.3818479 |
| age        | -.0006812 | .0004948  | -1.38  | 0.169 | -.001651             | .0002885  |
| female     | .0192601  | .0570202  | 0.34   | 0.736 | -.0924975            | .1310177  |
| white      | .3245344  | .1490394  | 2.18   | 0.029 | .0324225             | .6166463  |
| north      | -.2124501 | .1086396  | -1.96  | 0.051 | -.4253797            | .0004795  |
| midlands   | -.2639251 | .1161745  | -2.27  | 0.023 | -.491623             | -.0362273 |
| stheast    | .055605   | .1081671  | 0.51   | 0.607 | -.1563987            | .2676087  |
| wales      | -.1276934 | .1467027  | -0.87  | 0.384 | -.4152254            | .1598385  |
| scotland   | -.0027928 | .1296715  | -0.02  | 0.983 | -.2569442            | .2513586  |
| _cons      | -1.78081  | .169664   | -10.50 | 0.000 | -2.113345            | -1.448274 |

```

. margins, dydx(*)

Average marginal effects               Number of obs   =       18396
Model VCE      : OIM

Expression      : Pr(spellended), predict()
dy/dx w.r.t.    : logdur age female white north midlands stheast wales scotland

```

|          | Delta-method |           | z      | P> z  | [95% Conf. Interval] |           |
|----------|--------------|-----------|--------|-------|----------------------|-----------|
|          | dy/dx        | Std. Err. |        |       |                      |           |
| logdur   | -.0295023    | .0015999  | -18.44 | 0.000 | -.032638             | -.0263667 |
| age      | -.0000473    | .0000344  | -1.38  | 0.169 | -.0001146            | .00002    |
| female   | .0013372     | .0039588  | 0.34   | 0.736 | -.006422             | .0090964  |
| white    | .022532      | .0103541  | 2.18   | 0.030 | .0022384             | .0428256  |
| north    | -.0147501    | .0075463  | -1.95  | 0.051 | -.0295406            | .0000404  |
| midlands | -.018324     | .0080711  | -2.27  | 0.023 | -.0341431            | -.0025049 |
| stheast  | .0038606     | .0075101  | 0.51   | 0.607 | -.0108589            | .0185801  |
| wales    | -.0088656    | .0101862  | -0.87  | 0.384 | -.0288302            | .011099   |
| scotland | -.0001939    | .0090029  | -0.02  | 0.983 | -.0178393            | .0174515  |

```

.
.
. logit spellended c.logdur##i.female age white north midlands ///
>      stheast wales scotland

Iteration 0:   log likelihood = -5008.4638
Iteration 1:   log likelihood = -4783.2964
Iteration 2:   log likelihood = -4767.4626
Iteration 3:   log likelihood = -4767.4221
Iteration 4:   log likelihood = -4767.4221

Logistic regression               Number of obs   =       18396

```

```

Log likelihood = -4767.4221
LR chi2(10)      = 482.08
Prob > chi2      = 0.0000
Pseudo R2       = 0.0481

```

| spellended      | Coef.     | Std. Err. | z      | P> z  | [95% Conf. Interval] |           |
|-----------------|-----------|-----------|--------|-------|----------------------|-----------|
| logdur          | -.3992704 | .0303012  | -13.18 | 0.000 | -.4586598            | -.3398811 |
| female          |           |           |        |       |                      |           |
| female          | .1128758  | .0953895  | 1.18   | 0.237 | -.0740842            | .2998357  |
| female#c.logdur |           |           |        |       |                      |           |
| female          | -.0537299 | .0439818  | -1.22  | 0.222 | -.1399326            | .0324729  |
| age             | -.0007182 | .0004958  | -1.45  | 0.147 | -.0016899            | .0002535  |
| white           | .3371017  | .1493745  | 2.26   | 0.024 | .044333              | .6298704  |
| north           | -.2130891 | .1086314  | -1.96  | 0.050 | -.4260027            | -.0001754 |
| midlands        | -.2583377 | .1162399  | -2.22  | 0.026 | -.4861636            | -.0305117 |
| stheast         | .0565901  | .1081531  | 0.52   | 0.601 | -.1553862            | .2685663  |
| wales           | -.1243186 | .1467364  | -0.85  | 0.397 | -.4119167            | .1632794  |
| scotland        | -.005786  | .1296824  | -0.04  | 0.964 | -.2599589            | .2483869  |
| _cons           | -1.836906 | .1759215  | -10.44 | 0.000 | -2.181706            | -1.492106 |

```
. margins, dydx(*)
```

```

Average marginal effects      Number of obs   =    18396
Model VCE      : OIM

```

```

Expression      : Pr(spellended), predict()
dy/dx w.r.t.    : logdur 1.female age white north midlands stheast wales scotland

```

|          | Delta-method |           |        |       |                      |           |
|----------|--------------|-----------|--------|-------|----------------------|-----------|
|          | dy/dx        | Std. Err. | z      | P> z  | [95% Conf. Interval] |           |
| logdur   | -.0293117    | .0016086  | -18.22 | 0.000 | -.0324645            | -.0261589 |
| female   |              |           |        |       |                      |           |
| female   | .0013125     | .00397    | 0.33   | 0.741 | -.0064684            | .0090935  |
| age      | -.0000499    | .0000344  | -1.45  | 0.148 | -.0001173            | .0000176  |
| white    | .0234038     | .0103776  | 2.26   | 0.024 | .0030641             | .0437434  |
| north    | -.014794     | .0075455  | -1.96  | 0.050 | -.0295829            | -5.11e-06 |
| midlands | -.0179355    | .0080751  | -2.22  | 0.026 | -.0337624            | -.0021085 |
| stheast  | .0039288     | .0075089  | 0.52   | 0.601 | -.0107883            | .018646   |
| wales    | -.008631     | .0101882  | -0.85  | 0.397 | -.0285994            | .0113374  |
| scotland | -.0004017    | .0090034  | -0.04  | 0.964 | -.018048             | .0172446  |

Note: dy/dx for factor levels is the discrete change from the base level.

```

.
. xtset pid monthid
      panel variable:  pid (unbalanced)
      time variable:  monthid, 1 to 504
                delta:  1 unit

. xtlogit spellended logdur age female white north midlands ///
>          stheast wales scotland, re

```

Fitting comparison model:

```

Iteration 0:  log likelihood = -5008.4638
Iteration 1:  log likelihood = -4783.3483
Iteration 2:  log likelihood = -4768.2073
Iteration 3:  log likelihood = -4768.17
Iteration 4:  log likelihood = -4768.17

```

Fitting full model:

```

tau = 0.0    log likelihood = -4768.17
tau = 0.1    log likelihood = -4764.963
tau = 0.2    log likelihood = -4774.2245

```

```

Iteration 0: log likelihood = -4764.963
Iteration 1: log likelihood = -4749.0396
Iteration 2: log likelihood = -4733.5687
Iteration 3: log likelihood = -4729.4795
Iteration 4: log likelihood = -4729.399
Iteration 5: log likelihood = -4727.1244
Iteration 6: log likelihood = -4726.7637
Iteration 7: log likelihood = -4726.5519
Iteration 8: log likelihood = -4726.2948
Iteration 9: log likelihood = -4726.231
Iteration 10: log likelihood = -4726.0179
Iteration 11: log likelihood = -4725.9597
Iteration 12: log likelihood = -4725.9597 (backed up)
Iteration 13: log likelihood = -4725.9578
Iteration 14: log likelihood = -4725.9576

Random-effects logistic regression      Number of obs      =      18396
Group variable: pid                    Number of groups   =      1559

Random effects u_i ~ Gaussian          Obs per group: min =          1
                                      avg =         11.8
                                      max =         397

Integration method: mvaghermite        Integration points =         12

Log likelihood = -4725.9576            Wald chi2(9)       =         34.17
                                      Prob > chi2         =         0.0001

```

| spellended | Coef.     | Std. Err. | z     | P> z  | [95% Conf. Interval] |           |
|------------|-----------|-----------|-------|-------|----------------------|-----------|
| logdur     | 1.858135  | .3299491  | 5.63  | 0.000 | 1.211447             | 2.504824  |
| age        | -.0014969 | .0017551  | -0.85 | 0.394 | -.0049369            | .0019431  |
| female     | .1235313  | .1944873  | 0.64  | 0.525 | -.2576568            | .5047194  |
| white      | .9025535  | .5003579  | 1.80  | 0.071 | -.07813              | 1.883237  |
| north      | -.4843737 | .3663224  | -1.32 | 0.186 | -1.202352            | .2336049  |
| midlands   | -.7634782 | .3961922  | -1.93 | 0.054 | -1.540001            | .0130443  |
| stheast    | .3085841  | .3642315  | 0.85  | 0.397 | -.4052966            | 1.022465  |
| wales      | -.4189843 | .5029236  | -0.83 | 0.405 | -1.404696            | .566728   |
| scotland   | .0875062  | .4382564  | 0.20  | 0.842 | -.7714605            | .946473   |
| _cons      | -5.121941 | .7868293  | -6.51 | 0.000 | -6.664098            | -3.579784 |
| /lnsig2u   | 2.477658  | .2565855  |       |       | 1.974759             | 2.980556  |
| sigma_u    | 3.451569  | .4428114  |       |       | 2.684192             | 4.43833   |
| rho        | .7836068  | .0435085  |       |       | .6865226             | .8568916  |

Likelihood-ratio test of rho=0: chibar2(01) = 84.42 Prob >= chibar2 = 0.000

. margins, dydx(\*) predict(pu0)

```

Average marginal effects      Number of obs      =      18396
Model VCE      : OIM

```

```

Expression      : Pr(spellended=1 assuming u_i=0), predict(pu0)
dy/dx w.r.t.    : logdur age female white north midlands stheast wales scotland

```

|          | Delta-method |           |       |       |                      |           |
|----------|--------------|-----------|-------|-------|----------------------|-----------|
|          | dy/dx        | Std. Err. | z     | P> z  | [95% Conf. Interval] |           |
| logdur   | .2264818     | .0108952  | 20.79 | 0.000 | .2051277             | .247836   |
| age      | -.0001825    | .0002126  | -0.86 | 0.391 | -.0005992            | .0002343  |
| female   | .0150568     | .0236406  | 0.64  | 0.524 | -.0312779            | .0613915  |
| white    | .1100092     | .0593027  | 1.86  | 0.064 | -.0062219            | .2262402  |
| north    | -.0590387    | .0443257  | -1.33 | 0.183 | -.1459154            | .0278381  |
| midlands | -.0930578    | .0472956  | -1.97 | 0.049 | -.1857554            | -.0003602 |
| stheast  | .0376123     | .0440445  | 0.85  | 0.393 | -.0487134            | .1239379  |
| wales    | -.0510686    | .0611621  | -0.83 | 0.404 | -.1709441            | .0688069  |
| scotland | .0106658     | .05337    | 0.20  | 0.842 | -.0939374            | .1152691  |

```
.  
.  
. clear  
  
. log close  
    name: <unnamed>  
    log: C:\My Documents\Example_Chapter13.log  
    log type: text  
closed on: 1 Sep 2014, 15:37:04  
-----
```
